# Supplementary material for: Cu(i) catalysis for selective condensation/bicycloaromatization of two different arylalkynes: direct and general construction of functionalized C–N axial biaryl compounds
Source: Royal Society of Chemistry journal article supplement (doi:10.1039/d1sc03865f), 2021-12-13
Supplement: d1sc03865f1.pdf [file d1sc03865f1.pdf]

## **Cu(I) Catalysis for Selective Condensation/Bicycloaromatization of Two Different Arylalkynes: Direct and General Construction of Functionalized C–N Axial Biaryl Compounds**

Qian Shang,<sup>a</sup> Haifang Tang,<sup>a</sup> Yongping Liu,<sup>c</sup> MingMing Yin,<sup>c</sup> Lebin Su,<sup>a</sup> Shimin Xie,<sup>a</sup> Lixin Liu,<sup>a</sup> Wen Yang,<sup>a</sup> Yi Chen,<sup>c</sup> Jianyu Dong,<sup>\*,b</sup> Yongbo Zhou,<sup>\*,a</sup> and Shuang-Feng Yin<sup>a</sup>

<sup>a</sup>Advanced Catalytic Engineering Research Center of the Ministry of Education, College of Chemistry and Chemical Engineering, Hunan University, Changsha 410082, China

<sup>b</sup>Department of Educational Science, Hunan First Normal University, Changsha 410205, China

<sup>c</sup>School of Medicine, Hunan University of Chinese Medicine, Changsha, 410208, China

E-mail: [zhouyb@hnu.edu.cn](mailto:zhouyb@hnu.edu.cn)

[djyustc@hotmail.com](mailto:djyustc@hotmail.com)

### **Tables of Contents**

|                                                                                                         |             |
|---------------------------------------------------------------------------------------------------------|-------------|
| <b>1. General Information.....</b>                                                                      | <b>S2</b>   |
| <b>2. Possible Products from <i>o</i>-Amino Arylkyne 1a and/or <i>o</i>-Carbonyl Arylalkyne 1b.....</b> | <b>S2</b>   |
| <b>3. General Experimental Procedure.....</b>                                                           | <b>S5</b>   |
| <b>4. Investigations of the Reaction Mechanism.....</b>                                                 | <b>S47</b>  |
| <b>5. Asymmetric Synthesis.....</b>                                                                     | <b>S80</b>  |
| <b>6. MTT assay .....</b>                                                                               | <b>S86</b>  |
| <b>7. X-ray Crystallographic Data of 15c.....</b>                                                       | <b>S88</b>  |
| <b>8. Preparation of Substrates.....</b>                                                                | <b>S90</b>  |
| <b>9. Characterization Data for the Products.....</b>                                                   | <b>S97</b>  |
| <b>10. Copies of <sup>1</sup>H, <sup>13</sup>C and <sup>19</sup>C NMR Spectra of the Products .....</b> | <b>S132</b> |
| <b>11. References.....</b>                                                                              | <b>S237</b> |

## 1. General Information

### 1.1 Materials and Instruments

Except noted otherwise, all reactions were carried out in Schlenk tubes under N<sub>2</sub> atmosphere. Reagents and solvents were obtained from commercial sources (Energy Chemical, Aladdin, Alfa Aesar, Sigma-Aldrich, and J&K Scientific) and used without further purification. The <sup>1</sup>H, <sup>13</sup>C and <sup>19</sup>F NMR spectra were recorded on a Bruker ADVANCE III spectrometer at 400 MHz, 101 MHz, and 376 MHz respectively, and chemical shifts were reported in parts per million (ppm). Flash column chromatography was performed using silica gel of 300–400 μm. The GC-MS results were recorded on a GC-MS QP 2010 equipment, GC analysis was performed on GC 2014 plus. The electron ionization (EI) method was used for HRMS measurement, and the mass analyzer type is TOF for EI. The single-crystal X-ray diffraction was recorded on Bruker D8 QUEST. The conversion of starting materials was monitored by thin layer chromatography (TLC) using silica gel plates (silica gel 60 F254 0.25 mm), and components were visualized by observation under UV light (254 and 365 nm). The enantiomeric excesses were determined by chiral HPLC using a Shimadzu Prominence LC-20A instrument with a Daicel Chiralcel OD-H column.

### 1.2 Cell Culture and Western Blot Analysis

BV-2 microglia cell line was grown in Dulbecco's modified Eagle's medium (DMEM) (PAN Biotech, Aidenbach, DE) supplemented with 10% (v/v) fetal calf serum (FCS), 2 mM L-glutamine, 100 mg streptomycin, and 100 U penicillin (GIBCO, Gran Island, NY, USA). The cells were cultured in Petri dishes at 37 °C with 5% CO<sub>2</sub> and saturated humidity. Cell viability was determined by the CCK-8 assay (Dojindo Molecular Technologies, Shanghai, China). The viability was assessed before each experiment as part of standard protocol and cell counting. We proceeded with the experiment if the cell viability was ≥ 95% in both cultivation conditions. Cellular extracts were prepared in RIPA lysis buffer supplemented with protease inhibitor. Proteins were separated by sodium dodecyl sulfate polyacrylamide gel electrophoresis (SDS-PAGE) and blotted onto a PVDF Western blotting membrane (GE Healthcare Limited, Amersham, UK).

## 2. Possible Products from *o*-Amino Arylkyne 1a and/or *o*-Carbonyl Arylalkyne 1b

*As described in the main text, diverse types of reactions of both *o*-amino and *o*-carbonyl arylalkynes could occur.* *o*-Amino arylalkynes easily occur a series of reactions, such as hydration, intramolecular cyclization and dimerization, which produce amino aryl ketones,<sup>1</sup> indoles,<sup>2</sup> 2-(2-aminophenyl)quinoline,<sup>3</sup> etc. More types of reactions could also take place for *o*-carbonyl arylalkynes, producing diketone,<sup>4</sup> triketone,<sup>5</sup> 1-indanones,<sup>6</sup>

indenones,<sup>7</sup> 1-naphthols,<sup>6</sup> chalocones,<sup>8</sup> 1*H*-isochromene,<sup>9</sup> and chrysene,<sup>10</sup> etc. polymerizations of the two alkynes also could be occur.

Many possible products of the reactions of *o*-amino arylalkyne **1a** and/or *o*-carbonyl arylalkyne **1b** could be figured out. Simple possible products (except polymerization products) are as follows:

Scheme S1. Possible products from *o*-amino arylkynes **1a** and/or *o*-carbonyl arylkynes **1b**

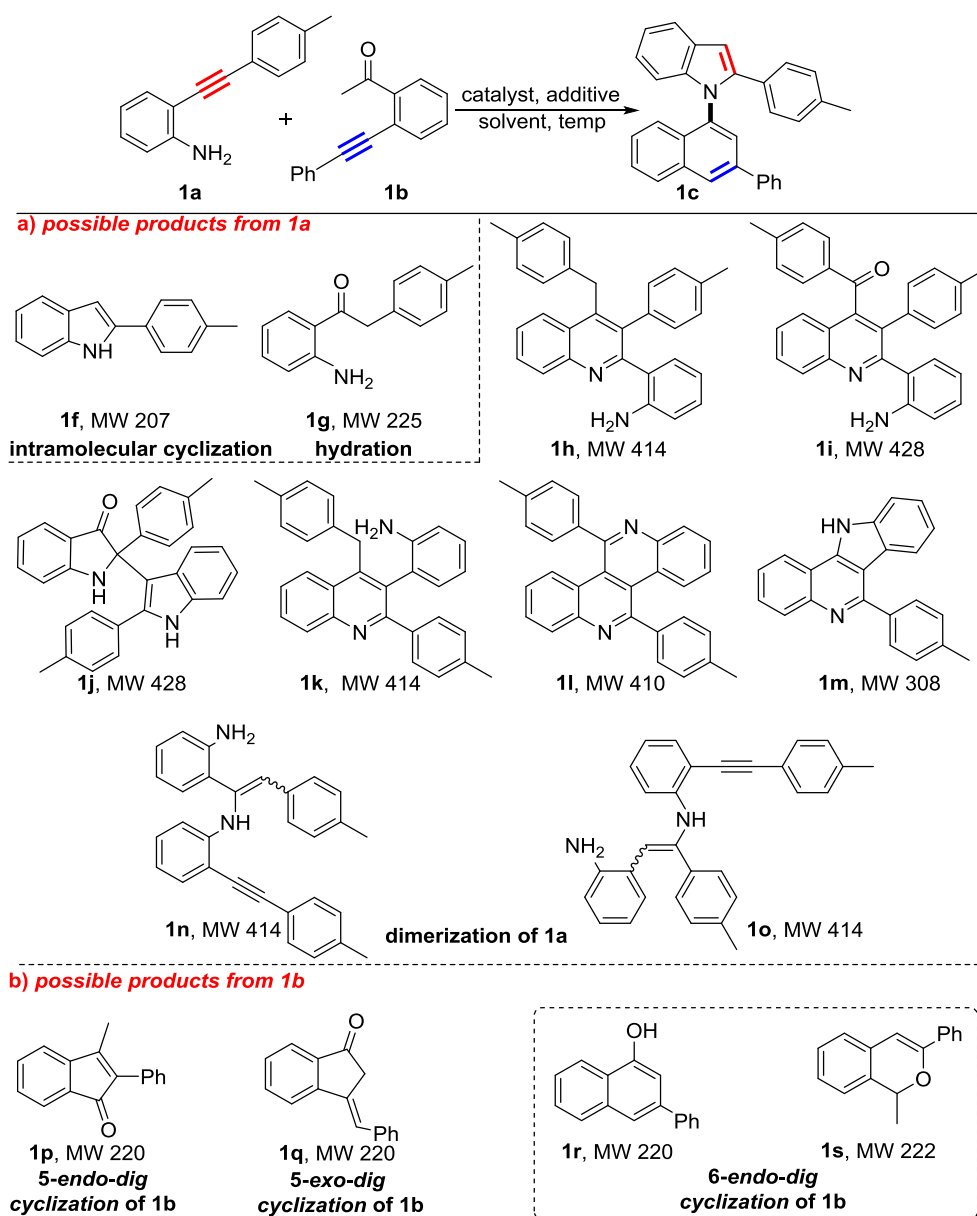

**b) possible products from 1b--continued**

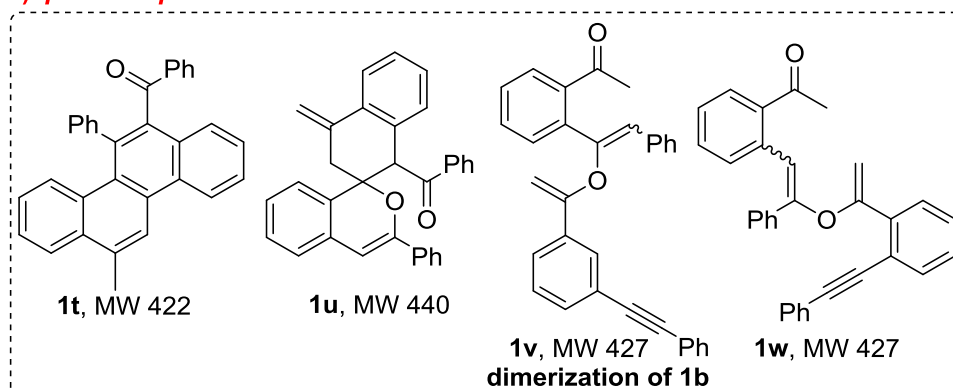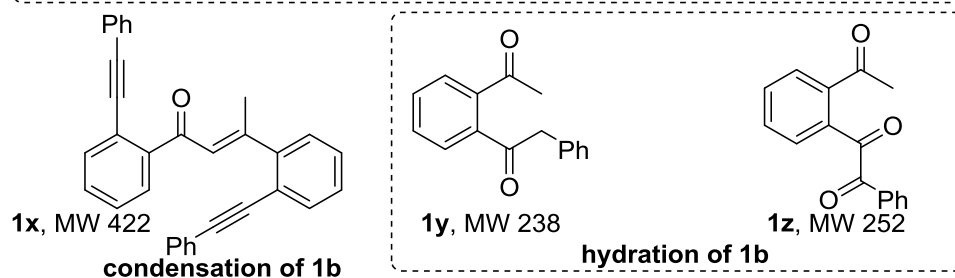

**c) possible cross products from 1a and 1b**

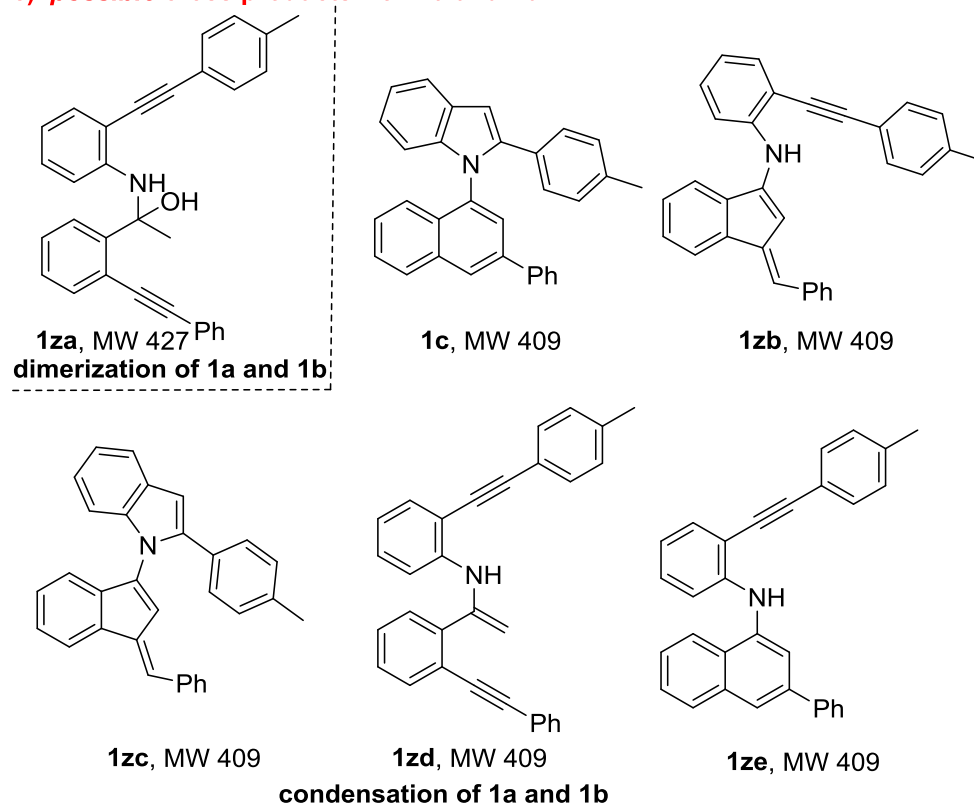

### 3. General Experimental Procedure

#### 3.1. Optimization of the Reaction Conditions

Table S1. Catalyst Screening

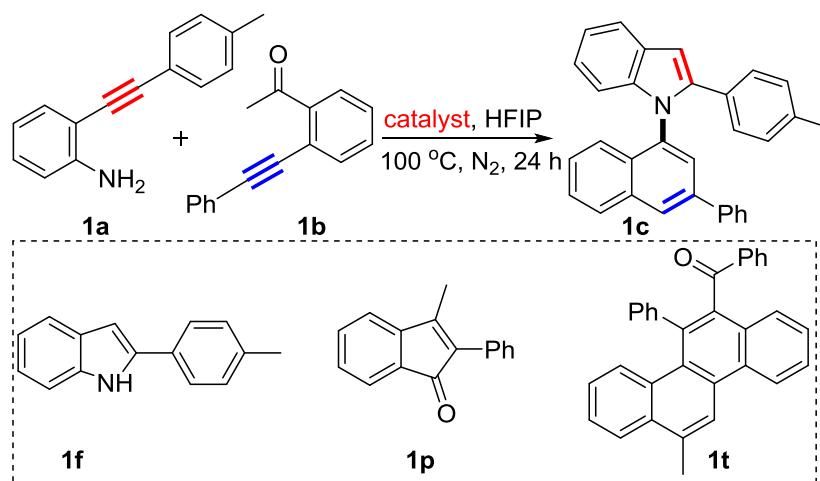

| entry          | catalyst             | conversion [%] <sup>b</sup> |               | yield [%] <sup>b</sup> |           |              |              |
|----------------|----------------------|-----------------------------|---------------|------------------------|-----------|--------------|--------------|
|                |                      | 1a                          | 1b            | 1c                     | 1f        | 1p           | 1t           |
| 1              | CuCl                 | >99                         | >99           | 64                     | 16        | trace        | trace        |
| 2              | CuBr                 | >99                         | >99           | 70                     | 21        | trace        | trace        |
| 3              | CuOAc                | >99                         | >99           | 79                     | 12        | trace        | trace        |
| 4              | <b>CuI</b>           | <b>&gt;99</b>               | <b>&gt;99</b> | <b>86</b>              | <b>11</b> | <b>trace</b> | <b>trace</b> |
| 5              | CuCl <sub>2</sub>    | >99                         | >99           | 8                      | 77        | trace        | trace        |
| 6              | Cu(OAc) <sub>2</sub> | >99                         | >99           | 10                     | 32        | trace        | trace        |
| 7              | Pd(OAc) <sub>2</sub> | >99                         | >99           | 7                      | 45        | trace        | trace        |
| 8 <sup>c</sup> | Pd(OAc) <sub>2</sub> | >50                         | >99           | trace                  | 48        | trace        | 5            |
| 9              | PdCl <sub>2</sub>    | >99                         | >99           | 6                      | 56        | trace        | trace        |
| 10             | Cu                   | >99                         | >90           | 38                     | 20        | trace        | trace        |
| 11             | Fe                   | >99                         | >85           | 27                     | 25        | trace        | 5            |
| 12             | Mg                   | >99                         | >80           | 20                     | 25        | trace        | 7            |
| 13             | FeCl <sub>3</sub>    | >99                         | >70           | trace                  | 40        | trace        | 4            |
| 14             | ZnBr <sub>2</sub>    | >99                         | >99           | 26                     | 19        | trace        | trace        |
| 15             | AgOAc                | >99                         | >80           | 4                      | 49        | trace        | 8            |

|    |                      |     |     |    |    |       |       |
|----|----------------------|-----|-----|----|----|-------|-------|
| 16 | NiSO <sub>4</sub>    | >99 | >80 | 21 | 36 | trace | 4     |
| 17 | MnCO <sub>3</sub>    | >99 | >85 | 11 | 50 | trace | trace |
| 18 | Co(OAc) <sub>2</sub> | >99 | >75 | 8  | 52 | trace | 5     |

<sup>a</sup>Reactions: **1a** (0.05 mmol), **1b** (0.05 mmol), Catalyst (10 mol %), in HFIP (0.5 mL) at 100 °C under N<sub>2</sub> for 24 h.

<sup>b</sup>GC yield using dodecane as an internal standard.

<sup>c</sup>DMF as Solvent.

Notes: Many byproducts have been detected, and different **catalysts** gave different types and selectivities of products (Figures S1-S9). The byproducts of the intramolecular cyclization product (**1f**) of **1a**, intramolecular cyclization (**1p**) of **1b**, dimerization (**1t**) of **1b** were selected to be shown in Table S1.

#### Selected GC and/or GC-MS charts of the reactions catalyzed by different catalysts.

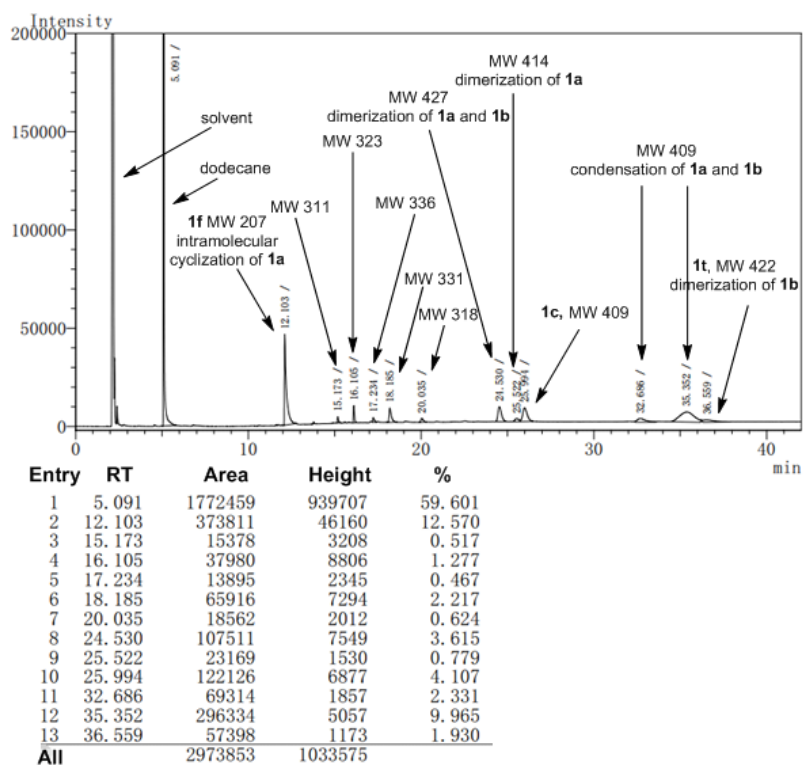

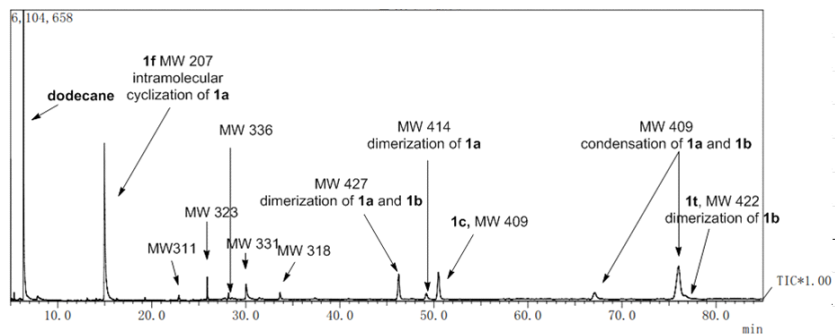

Figure S1. The GC and GC-MS charts of the crude reaction mixture by PdCl<sub>2</sub> catalysis (Table S1, entry 9)

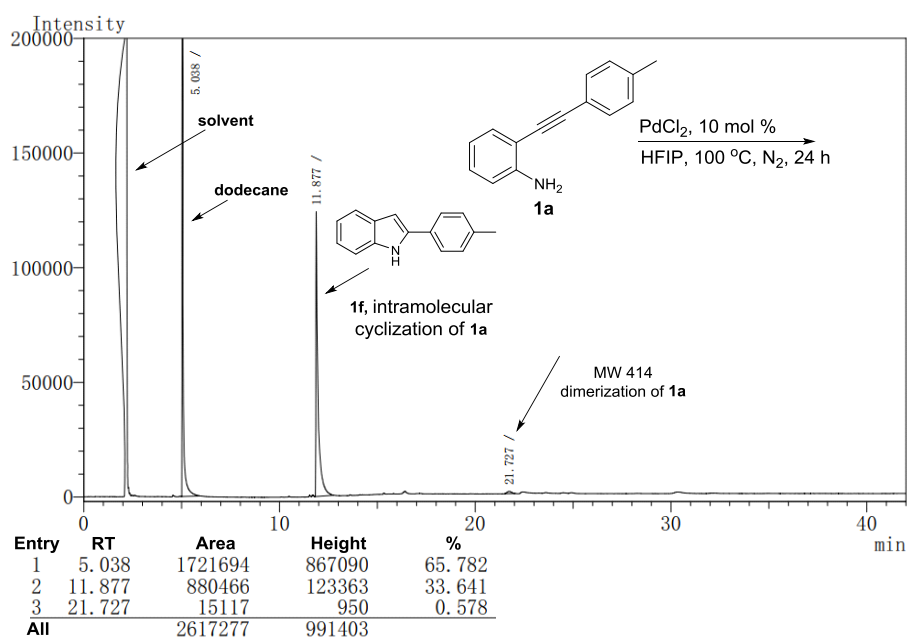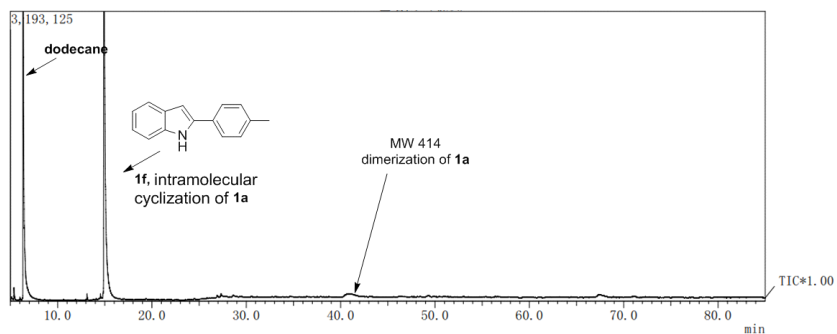

Figure S2. The GC and GC-MS charts of the crude reaction mixture of 1a by PdCl<sub>2</sub> catalysis

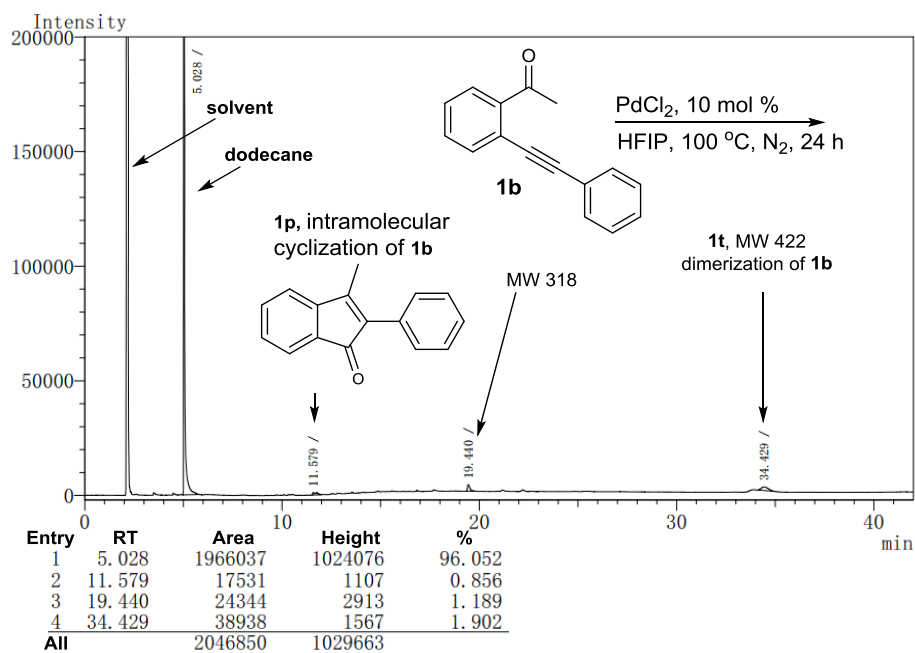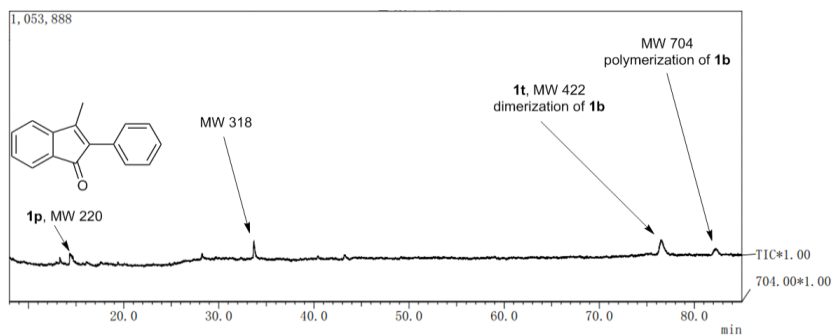

Figure S3. The GC and GC-MS charts of the crude reaction mixture of **1b** by PdCl<sub>2</sub> catalysis



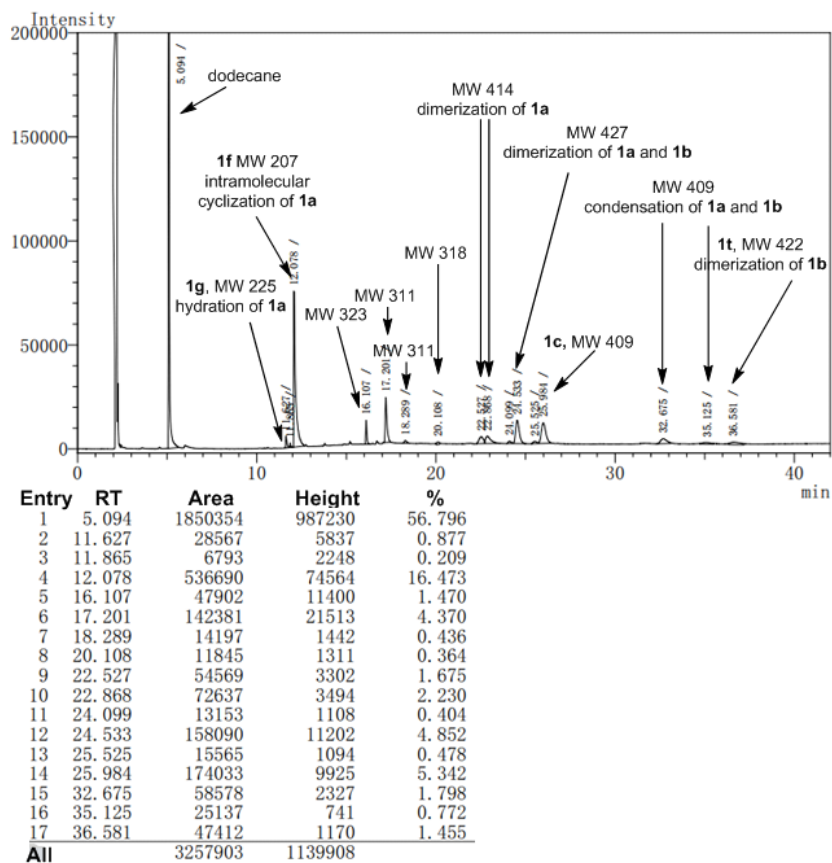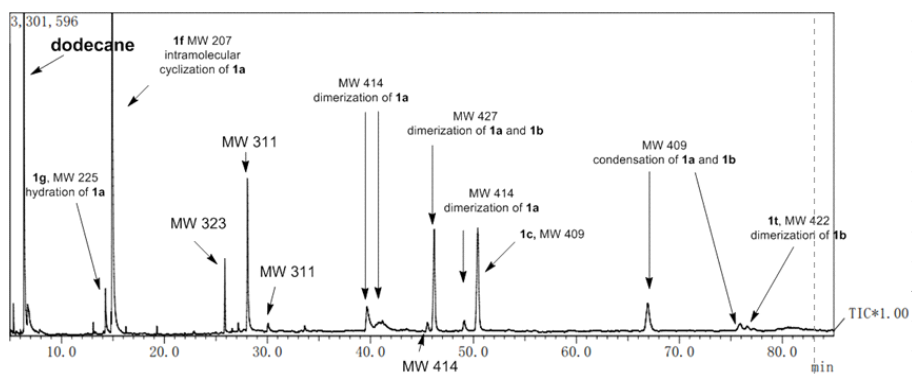

Figure S4. The GC and GC-MS charts of the crude reaction mixture by  $\text{CuCl}_2$  catalysis (Table S1, entry 5)

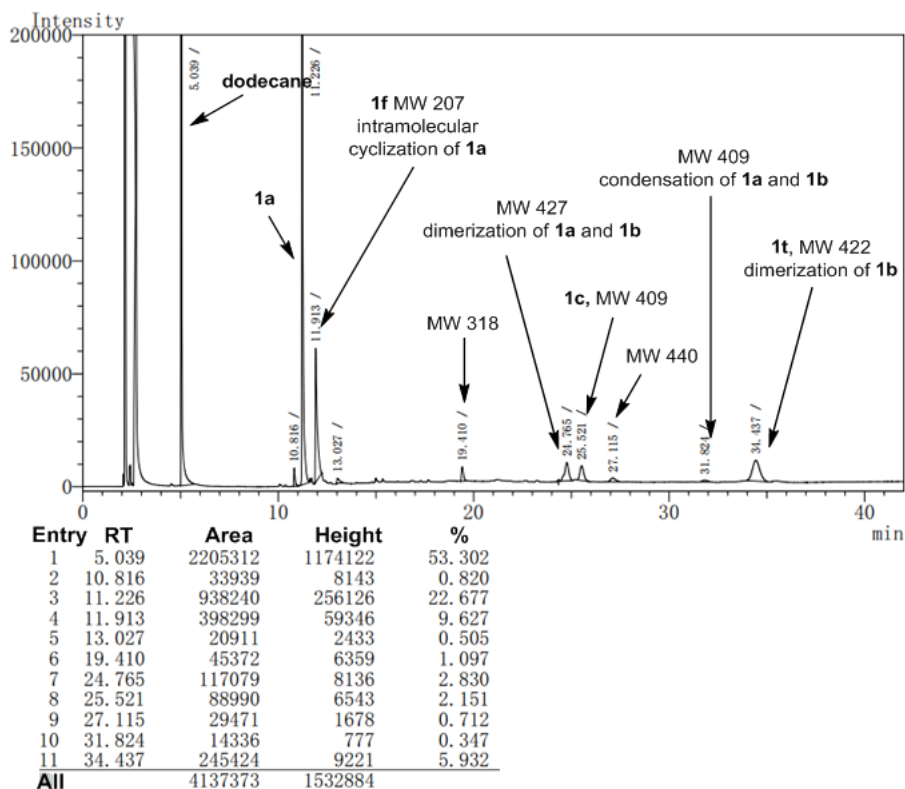

Figure S5. The GC chart of the crude reaction mixture by Pd(OAc)<sub>2</sub> catalysis in DMF (Table S1, entry 8)

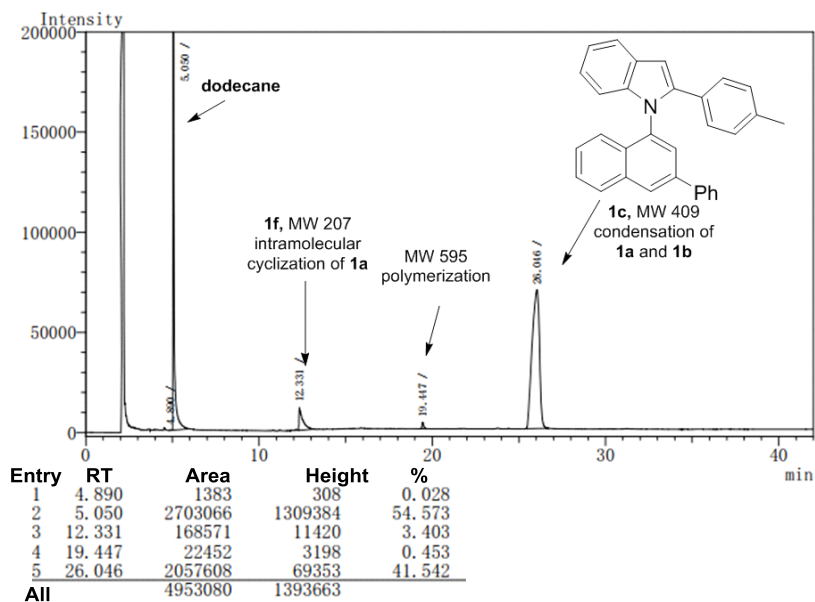

Figure S6. The GC chart of the crude reaction mixture by CuCl catalysis (Table S1, entry 1)

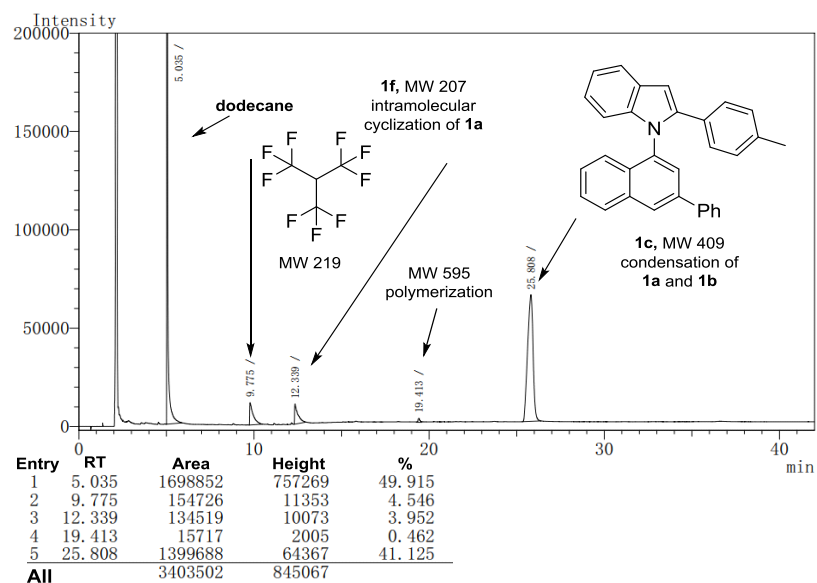

Figure S7. The GC chart of the crude reaction mixture by CuBr catalysis (Table S1, entry 2)

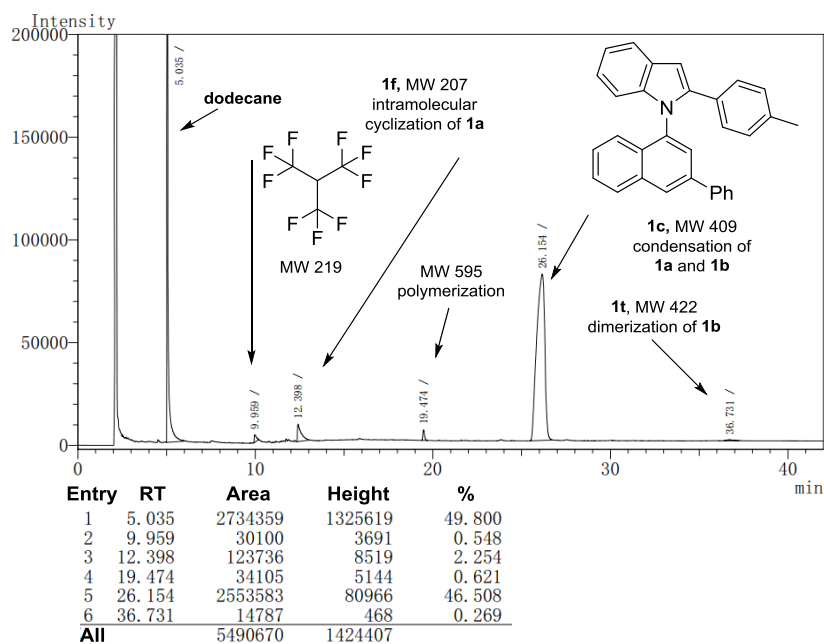

Figure S8. The GC chart of the crude reaction mixture by CuOAc catalysis (Table S1, entry 3)

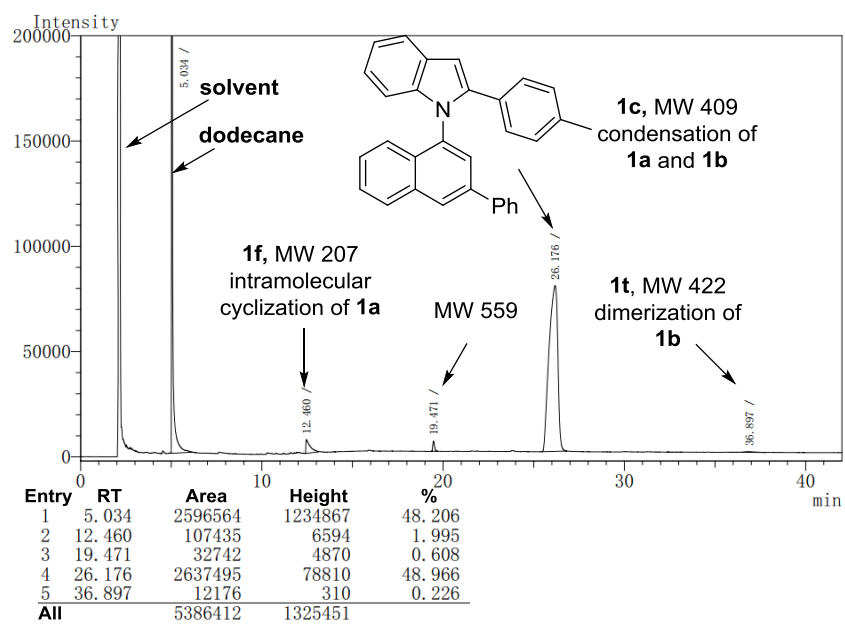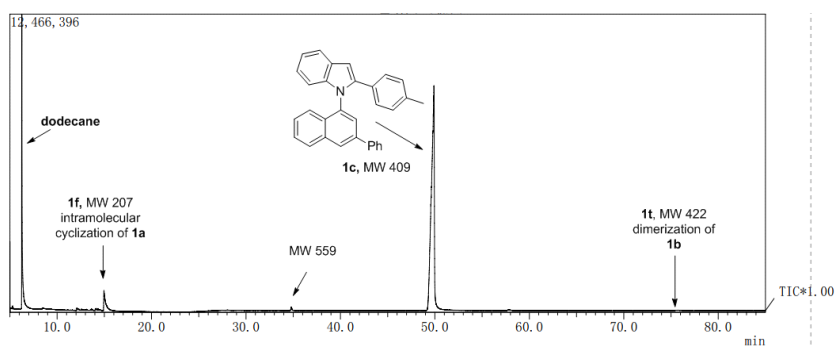

**Figure S9.** The GC chart of the crude reaction mixture by CuI catalysis (Table S1, entry 4)

**Table S2. Solvent Screening**

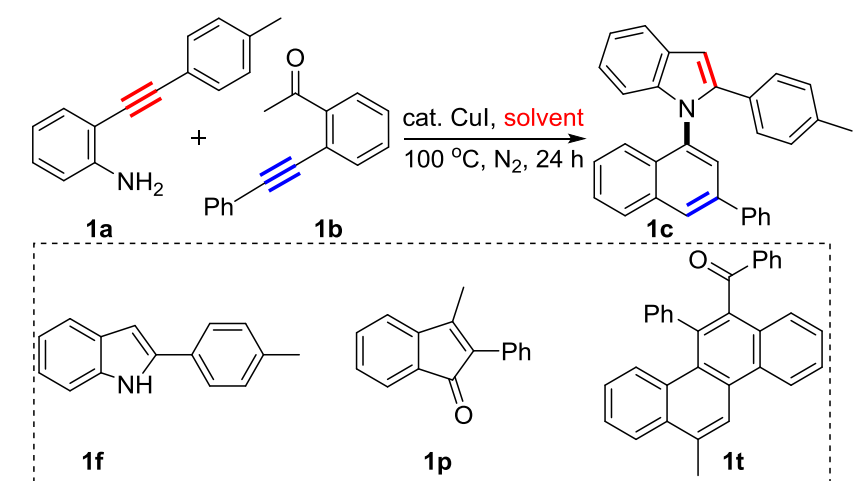

| entry | solvent  | conversion [%] <sup>b</sup> |     | yield [%] <sup>b</sup> |    |       |       |
|-------|----------|-----------------------------|-----|------------------------|----|-------|-------|
|       |          | 1a                          | 1b  | 1c                     | 1f | 1p    | 1t    |
| 1     | HFIP     | >99                         | >99 | 86                     | 11 | trace | trace |
| 2     | TFE      | >99                         | >99 | 60                     | 19 | trace | trace |
| 3     | TFP      | >84                         | >99 | trace                  | 30 | trace | 11    |
| 4     | TFB      | >90                         | >99 | 5                      | 32 | trace | 14    |
| 5     | PFTB     | >99                         | >99 | 66                     | 23 | trace | trace |
| 6     | MeOH     | >50                         | >99 | 10                     | 23 | trace | 5     |
| 7     | EtOH     | >76                         | >99 | 4                      | 38 | trace | 11    |
| 8     | Propanol | >65                         | >99 | trace                  | 35 | trace | 6     |
| 9     | IPA      | >83                         | >99 | 10                     | 40 | trace | 7     |
| 10    | TBA      | >80                         | >99 | 8                      | 38 | trace | trace |
| 11    | Toluene  | >50                         | >30 | trace                  | 47 | trace | trace |
| 12    | THF      | >73                         | >37 | 10                     | 38 | trace | trace |
| 13    | DMF      | >99                         | >99 | trace                  | 55 | trace | 8     |
| 14    | DCM      | >60                         | >99 | 19                     | 33 | trace | trace |

<sup>a</sup>Reactions: **1a** (0.05 mmol), **1b** (0.05 mmol), CuI (10 mol %), in Solvent (0.5 mL) at 100 °C under N<sub>2</sub> for 24 h.

<sup>b</sup>GC yield using dodecane as an internal standard.

<sup>c</sup>TFE (2,2,2-Trifluoroethanol); TFP (3,3,3-Trifluoro-1-propanol); TFB (4,4,4-Trifluorobutanol); PFTB (Perfluoro-tert-butyl Alcohol); IPA(iso-Propyl alcohol); TBA (Tert- butyl alcohol).

Notes: Many byproducts have been detected, and different solvents gave different types and selectivities of products (Figures S10-S12). The products of the intramolecular cyclization product (**1f**) of **1a**, intramolecular cyclization (**1p**) of **1b**, dimerization (**1t**) of **1b** were selected to be shown in Table S2.

### Selected GC and/or GC-MS charts of the reactions in different solvents

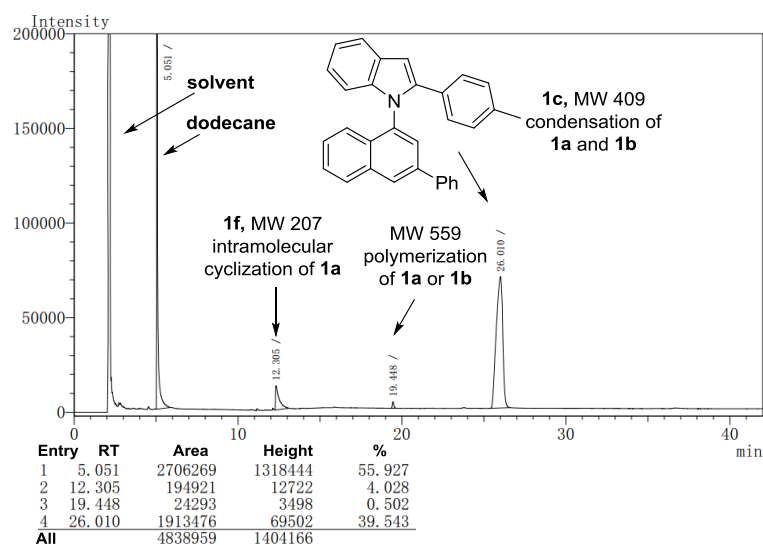

Figure S10. The GC chart of the crude reaction mixture in TFE (Table S2, entry 2)

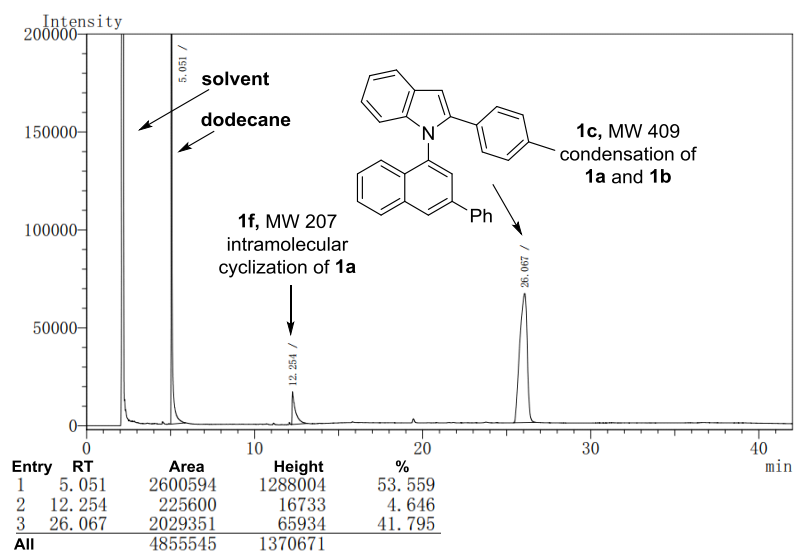

Figure S11. The GC chart of the crude reaction mixture in PFTB (Table S2, entry 5)

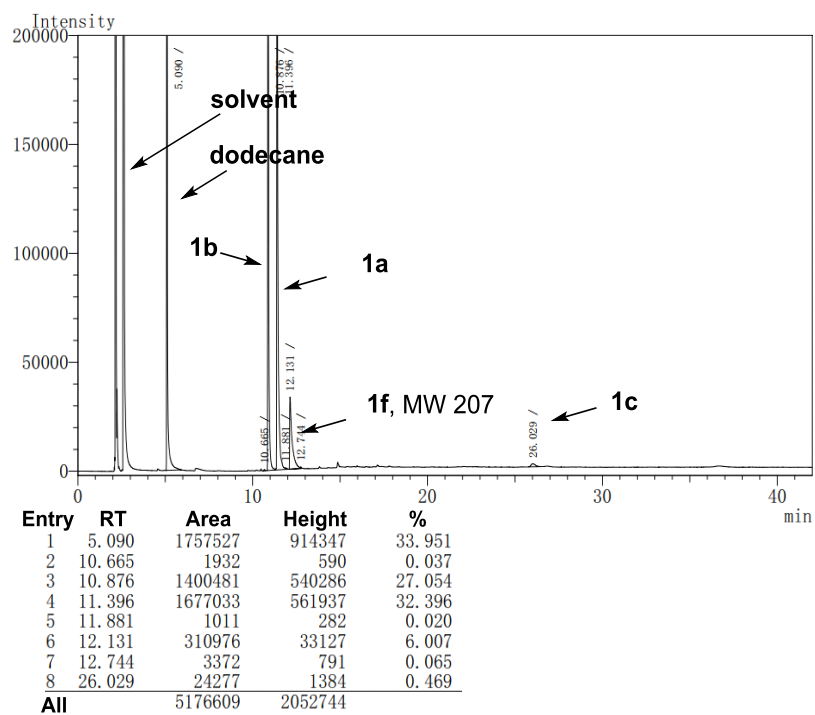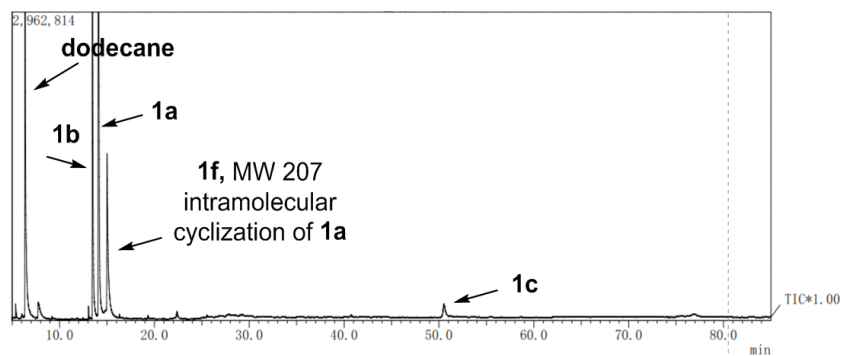

Figure S12. The GC and GC-MS charts of the crude reaction mixture in Toluene (Table S2, entry 11)

**Table S3. Temperature Screening**

| Entry    | T(°C)      | conversion [%] <sup>b</sup> |           | yield [%] <sup>b</sup> |           |           |           |
|----------|------------|-----------------------------|-----------|------------------------|-----------|-----------|-----------|
|          |            | <b>1a</b>                   | <b>1b</b> | <b>1c</b>              | <b>1f</b> | <b>1p</b> | <b>1t</b> |
| <b>1</b> | <b>100</b> | >99                         | >99       | <b>86</b>              | <b>11</b> | trace     | trace     |
| 2        | 60         | >76                         | >99       | 53                     | trace     | trace     | trace     |
| 3        | 80         | >99                         | >99       | 75                     | 15        | trace     | trace     |
| 4        | 120        | >99                         | >99       | 82                     | 17        | trace     | trace     |
| 5        | 140        | >99                         | >99       | 78                     | 20        | trace     | trace     |

<sup>a</sup>Reactions: **1a** (0.05 mmol), **1b** (0.05 mmol), CuI (10 mol %), in HFIP (0.5 mL) at 100 °C under N<sub>2</sub> for 24 h.

<sup>b</sup>GC yield using tridecane as an internal standard.

*Notes: Different temperatures gave different selectivities of the product (Figures S13-14). The products of the intramolecular cyclization product (**1f**) of **1a**, intramolecular cyclization (**1p**) of **1b**, dimerization (**1t**) of **1b** were selected to be shown in Table S3.*



Selected GC charts of the reactions at different temperatures

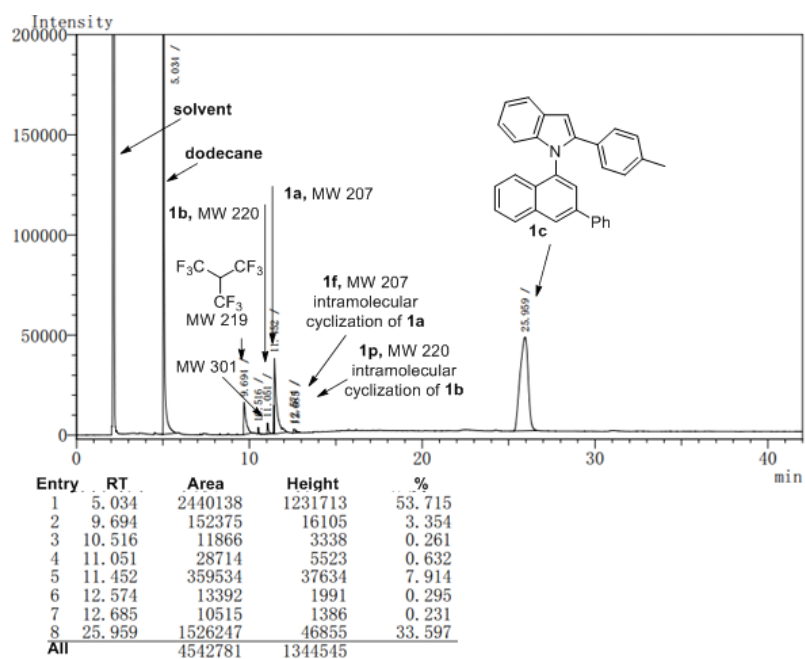

Figure S13. The GC chart of the crude reaction mixture at 60 °C (Table S3, entry 2)

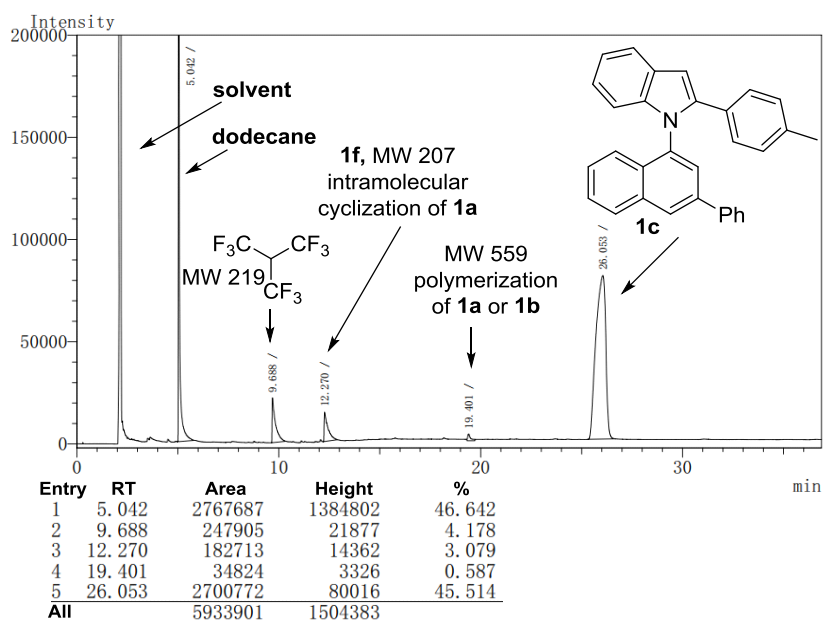

Figure S14. The GC chart of the crude reaction mixture at 120 °C (Table S3, entry 4)

**Table S4. Ligand Screening**

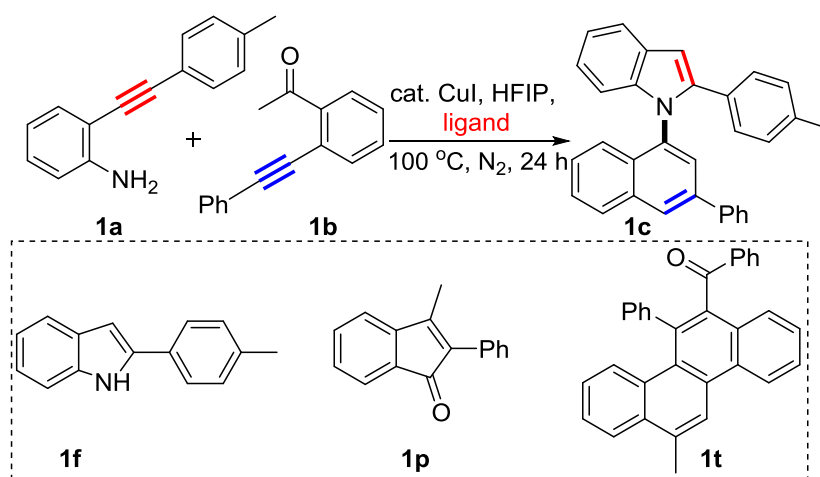

| Entry | Ligand | conversion [%] <sup>b</sup> |           | yield [%] <sup>b</sup> |           |           |           |
|-------|--------|-----------------------------|-----------|------------------------|-----------|-----------|-----------|
|       |        | <b>1a</b>                   | <b>1b</b> | <b>1c</b>              | <b>1f</b> | <b>1p</b> | <b>1t</b> |
| 1     | /      | >99                         | >99       | 86                     | 11        | trace     | trace     |
| 2     | PHEN   | >92                         | >99       | 74                     | 16        | trace     | trace     |
| 3     | MEDA   | >99                         | >99       | 78                     | 18        | trace     | trace     |
| 4     | DPPF   | >99                         | >99       | 79                     | 20        | trace     | trace     |
| 5     | BINAP  | >99                         | >99       | 83                     | 14        | trace     | trace     |

<sup>a</sup>Reactions: **1a** (0.05 mmol), **1b** (0.05 mmol), CuI (10 mol %), in HFIP (0.5 mL) at 100 °C under N<sub>2</sub> for 24 h.

<sup>b</sup>GC yield using tridecane as an internal standard.

*Notes: Additions of the ligands did not improve the yield of the desired products.*

**Table S5. Additive Screening**

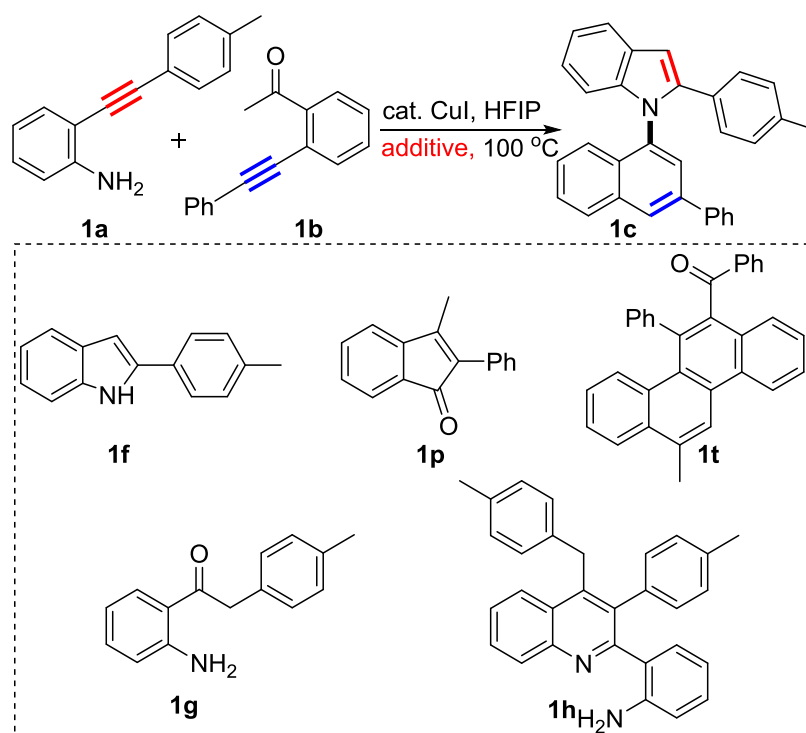

| Entry          | Additive                            | Conversion [%] <sup>b</sup> |               | yield [%] <sup>b</sup> |           |              |           |           |           |
|----------------|-------------------------------------|-----------------------------|---------------|------------------------|-----------|--------------|-----------|-----------|-----------|
|                |                                     | <b>1a</b>                   | <b>1b</b>     | <b>1c</b>              | <b>1f</b> | <b>1p</b>    | <b>1t</b> | <b>1g</b> | <b>1h</b> |
| 1              | /                                   | >99                         | >99           | 86                     | 11        | trace        | trace     | nd        | nd        |
| 2              | TsOH                                | >99                         | >99           | trace                  | 31        | trace        | 5         | 27        | 10        |
| 3              | HOAc                                | >99                         | >99           | trace                  | 25        | trace        | trace     | 15        | trace     |
| 4              | Na <sub>2</sub> CO <sub>3</sub>     | >99                         | >99           | 84                     | 11        | trace        | trace     | nd        | nd        |
| 5              | K <sub>3</sub> PO <sub>4</sub>      | >99                         | >99           | 87                     | 9         | trace        | trace     | nd        | nd        |
| 6              | <i>t</i> -BuOK                      | >99                         | >99           | 88                     | 7         | trace        | trace     | nd        | nd        |
| 7              | <b>Cs<sub>2</sub>CO<sub>3</sub></b> | <b>&gt;99</b>               | <b>&gt;99</b> | <b>91</b>              | <b>5</b>  | <b>trace</b> | <b>nd</b> | <b>nd</b> | <b>nd</b> |
| 8 <sup>c</sup> | Cs <sub>2</sub> CO <sub>3</sub>     | >99                         | >99           | 88                     | 8         | trace        | nd        | nd        | nd        |
| 9 <sup>d</sup> | Cs <sub>2</sub> CO <sub>3</sub>     | >99                         | >99           | 92                     | 6         | trace        | trace     | nd        | nd        |

<sup>a</sup>Reactions: **1a** (0.05 mmol), **1b** (0.05 mmol), CuI (10 mol %), additive (2.0 equiv) in HFIP (0.5 mL) at 100 °C

under N<sub>2</sub> for 24 h. <sup>b</sup>Conversion and GC yield using dodecane as an internal standard. <sup>c</sup>additive (1.0 equiv).

<sup>d</sup>additive (3.0 equiv).

Notes: Many byproducts have been detected, and different additives gave different types and selectivities of products (Figures S15-S16). The byproducts of the intramolecular cyclization product (**1f**) of **1a**, intramolecular cyclization (**1p**) of **1b**, dimerization (**1t**) of **1b** were selected to be shown in Table S5.

### Selected GC and GC-MS charts of the reaction in the presence of different additives

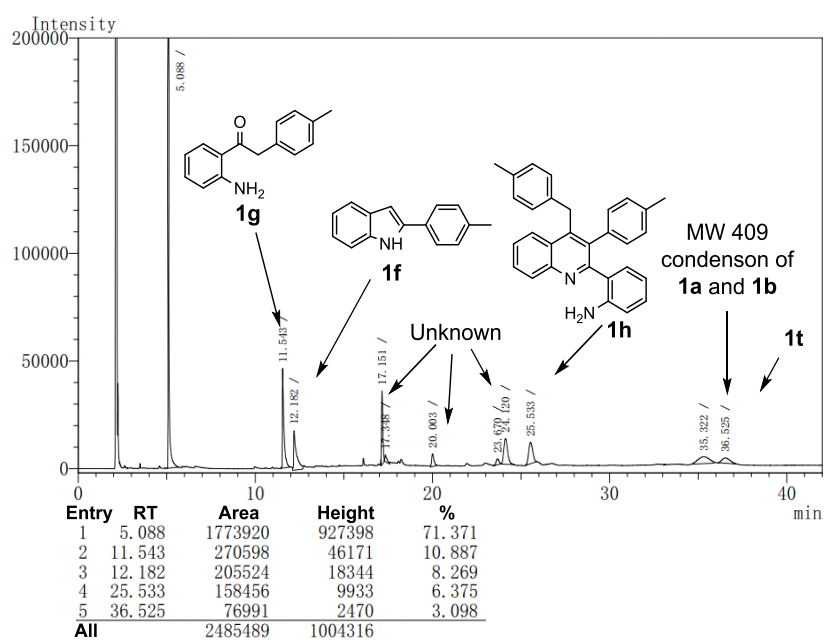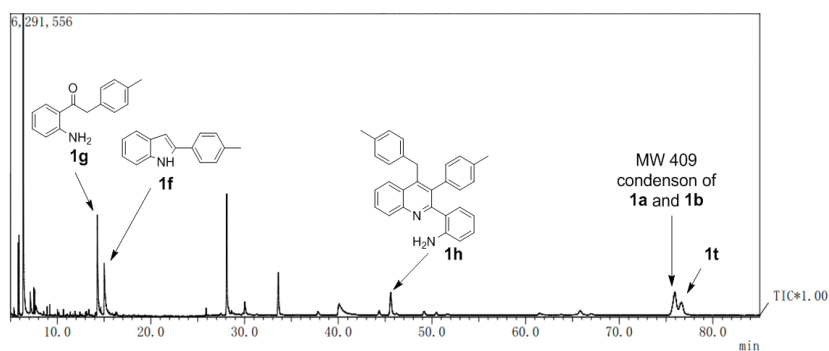

Figure S15. The GC and GC-MS charts of the crude reaction mixture in the presence of TsOH (Table S5, entry 2)

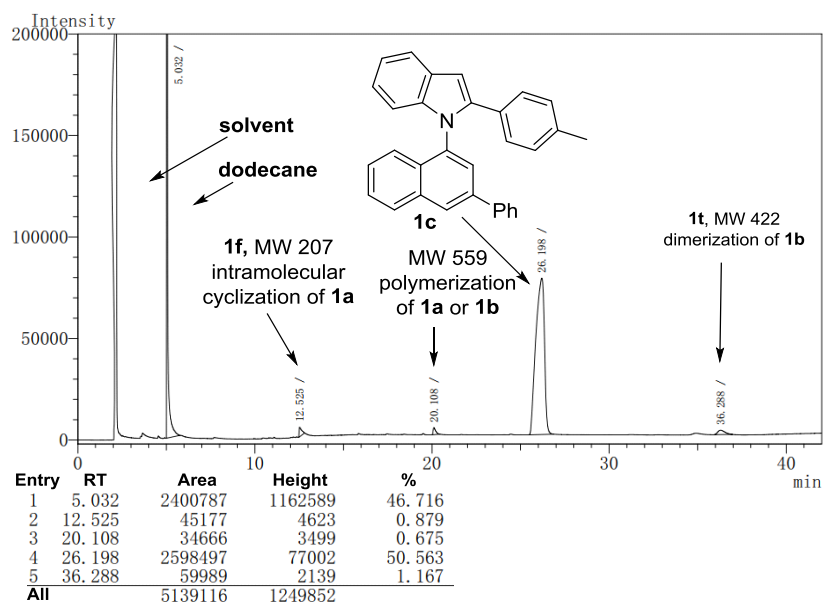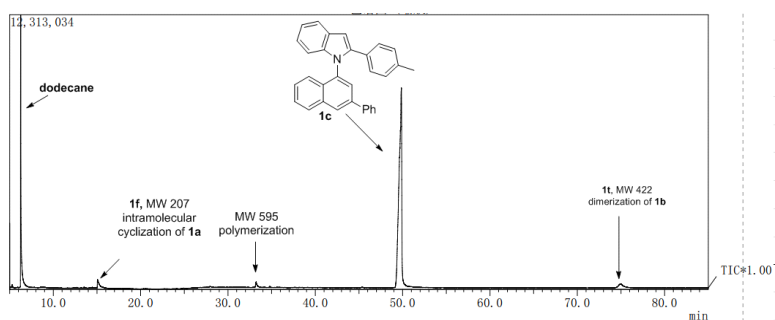

**Figure S16.** The GC and GC-MS charts of the crude reaction mixture in the presence of (2.0 equiv)  $\text{Cs}_2\text{CO}_3$  as additive (Table S5, entry 7)

**Table S6. Ratio of 1a and 1b Screening**

| Entry | 1a<br>(mmol) | 1b<br>(mmol) | conversion [%] <sup>b</sup> |     | yield [%] <sup>b</sup> |    |       |    |
|-------|--------------|--------------|-----------------------------|-----|------------------------|----|-------|----|
|       |              |              | 1a                          | 1b  | 1c                     | 1f | 1p    | 1t |
| 1     | 0.12         | 0.10         | >99                         | >99 | 85                     | 10 | trace | nd |
| 2     | 0.10         | 0.10         | >99                         | >99 | 91                     | 5  | trace | nd |
| 3     | 0.10         | 0.11         | >99                         | >99 | 92                     | 7  | trace | nd |
| 4     | 0.10         | 0.12         | >99                         | >99 | 94                     | 5  | 2     | nd |
| 5     | 0.10         | 0.13         | >99                         | >99 | 91                     | 7  | 6     | nd |

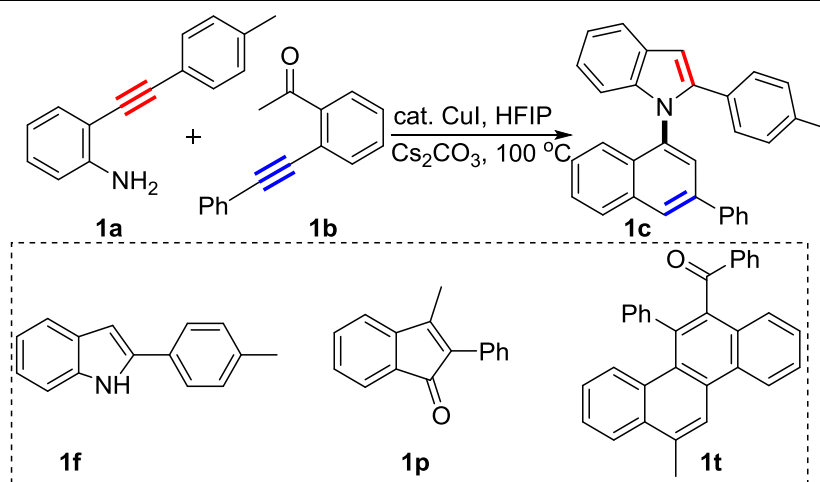

<sup>a</sup>Reactions: **1a**, **1b**, catalyst (10 mol %), Cs<sub>2</sub>CO<sub>3</sub>(2.0 equiv) in HFIP (0.5 mL) at 100 °C under N<sub>2</sub> for 24 h.

<sup>b</sup>Conversion and GC yield using dodecane as an internal standard.

*Notes: The different ratio of **1a** and **1b** gave different selectivities of products. The byproducts of the intramolecular cyclization product (**1f**) of **1a**, intramolecular cyclization (**1p**) of **1b**, dimerization (**1t**) of **1b** were selected to be shown in Table S6.*

**Scheme S2. The optimal reaction conditions**

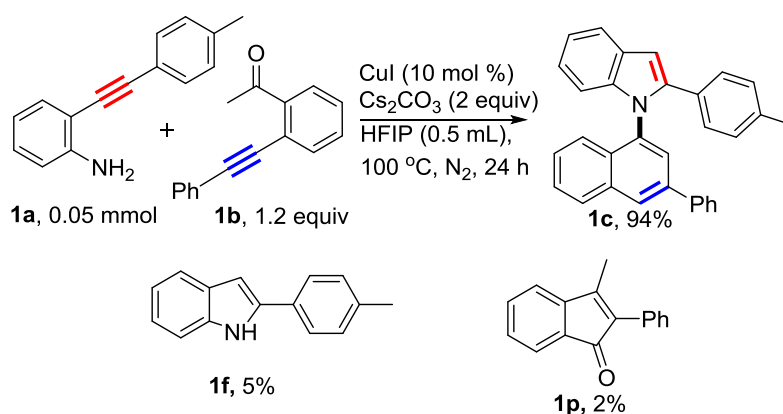

*Optimal reaction conditions: treatment with 2-(p-tolylethynyl)aniline (1a, 0.05 mmol) and 2'-phenylethynylacetophenone (1b, 1.2 equiv) in the presence of CuI (10 mol %), and Cs<sub>2</sub>CO<sub>3</sub> (2 equiv) in 1,1,1,3,3,3-hexafluoropropan-2-ol (HFIP) (0.5 mL) at 100 °C for 24 h.*

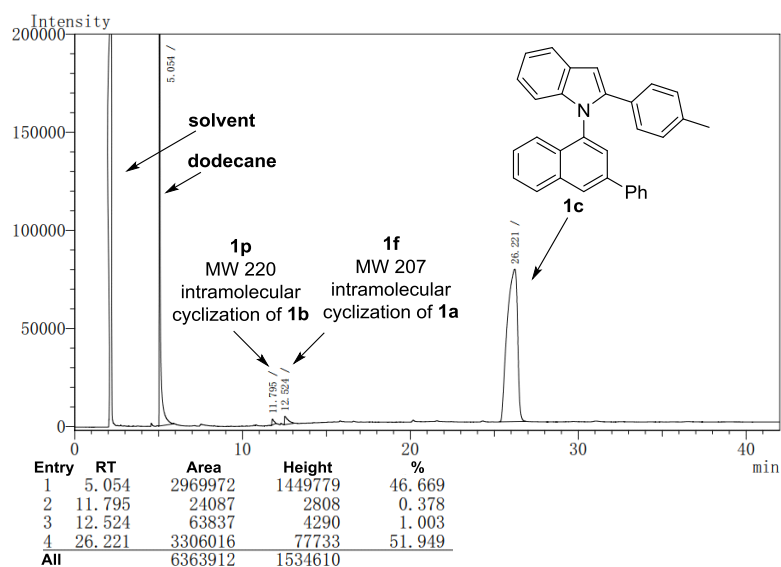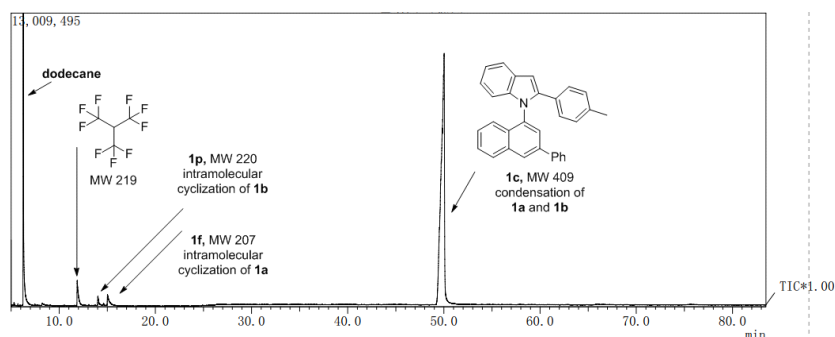

**Figure S17. The GC and GC-MS charts of the crude reaction mixture under the optimal reaction conditions**

(Table S6, entry 4)

### 3.2. GC, GC-MS Charts and NMR Spectrum of 1a, 1b, and Byproducts

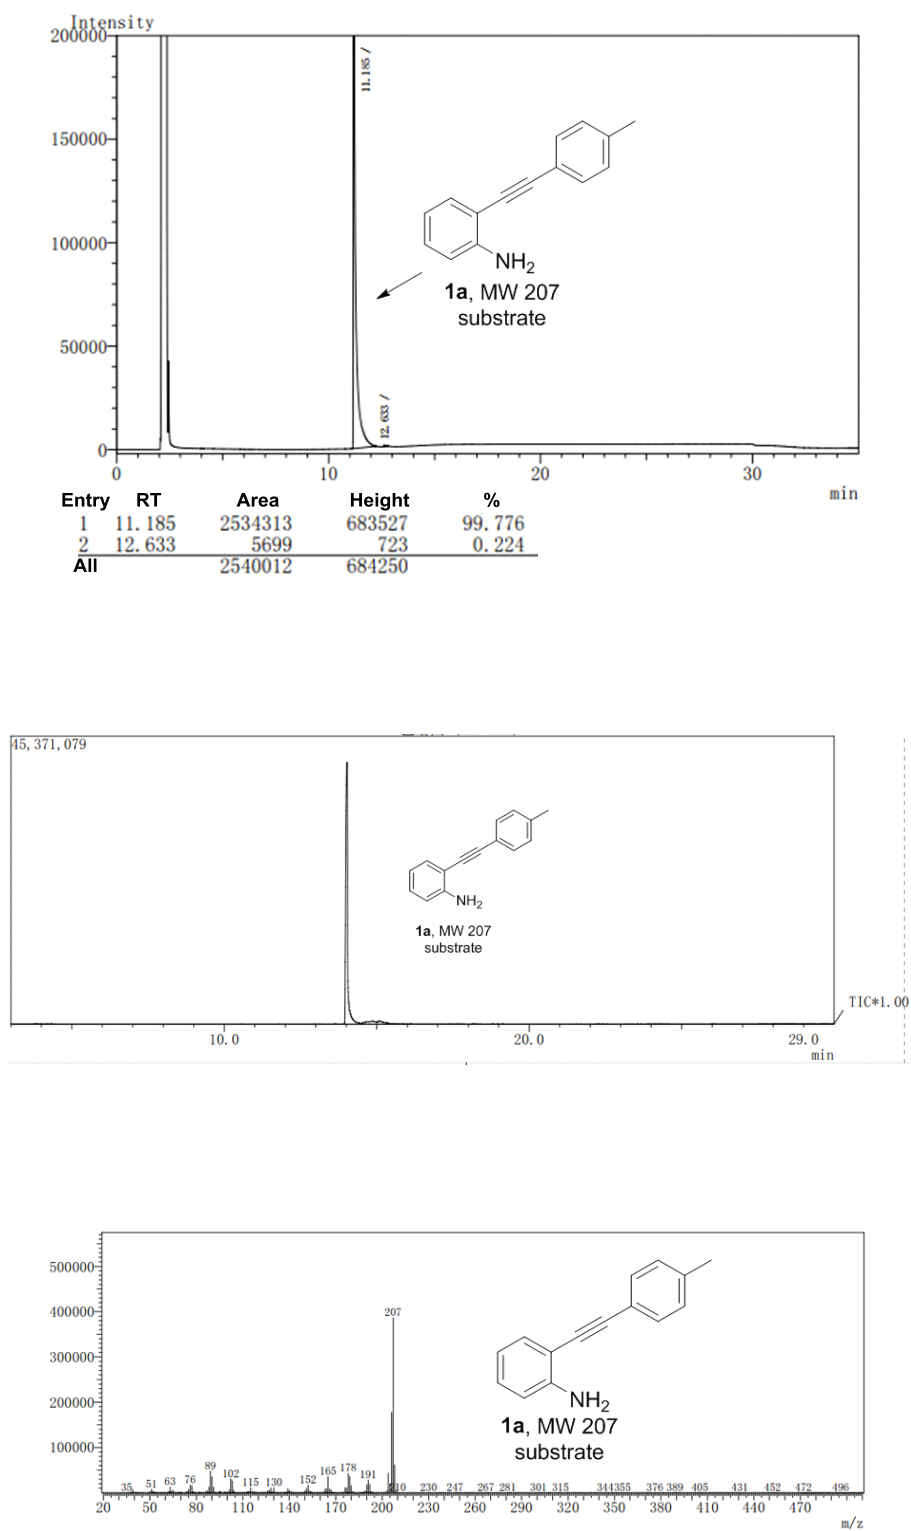

Figure S18. The GC and GC-MS charts 1a.



2-(p-tolyethynyl)aniline (**1a**)

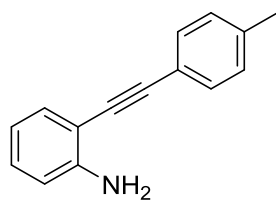

$^1\text{H NMR}$  (400 MHz,  $\text{CDCl}_3$ )  $\delta$  7.39 (dd,  $J = 25.4, 7.2$  Hz, 3H), 7.14 (dd,  $J = 14.5, 7.4$  Hz, 3H), 6.71 (t,  $J = 7.2$  Hz, 2H), 4.26 (s, 2H), 2.37 (s, 3H).

$^1\text{H NMR}$  Spectrum of **1a**

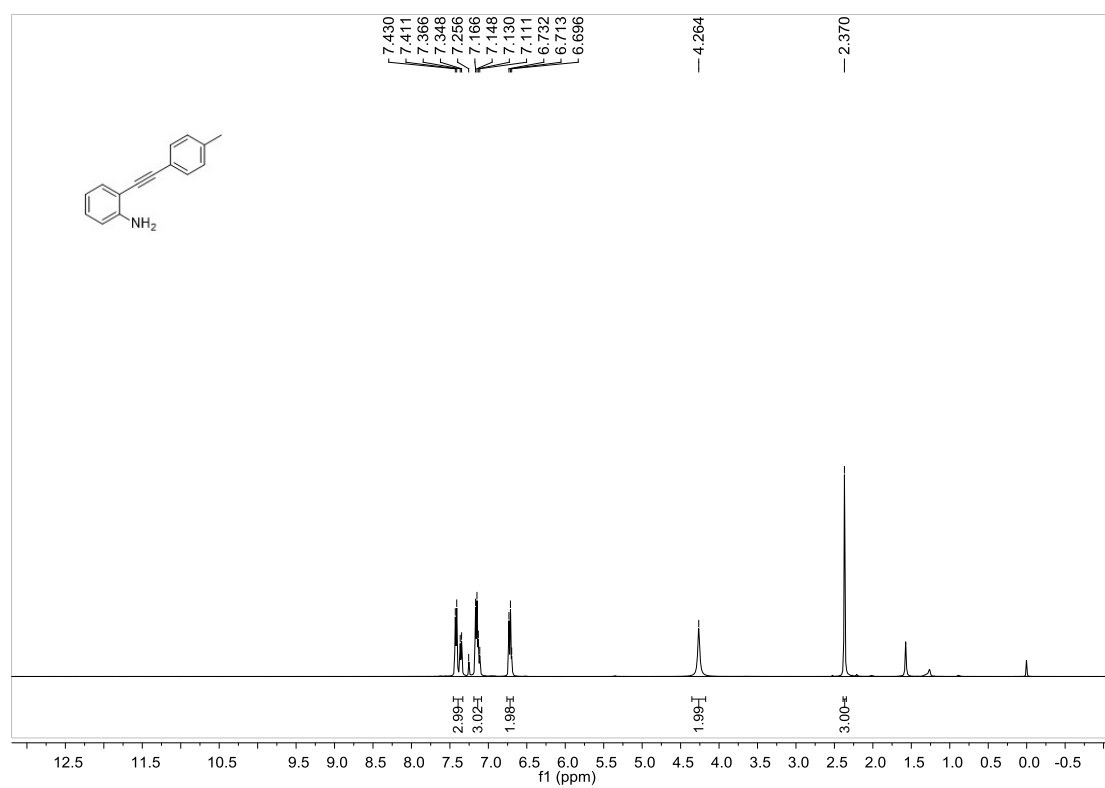

Figure S19. The  $^1\text{H}$  and  $^{13}\text{C}$  NMR Spectrum of **1a**.

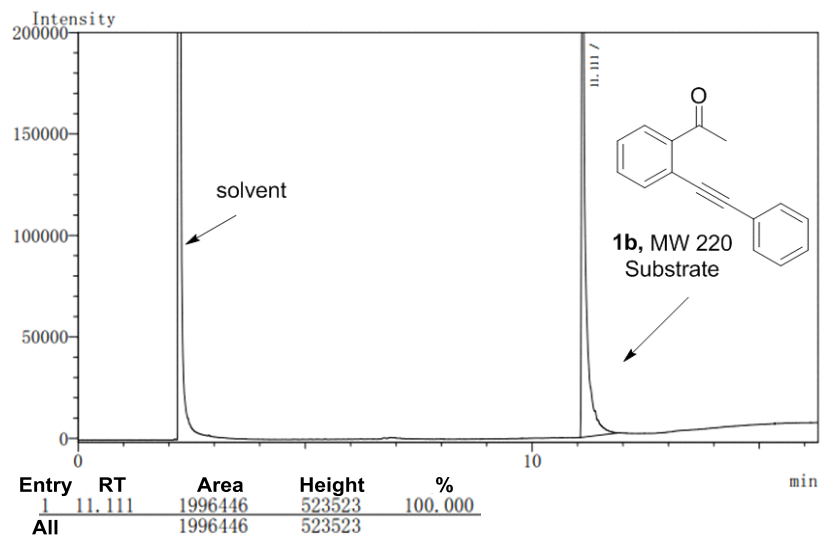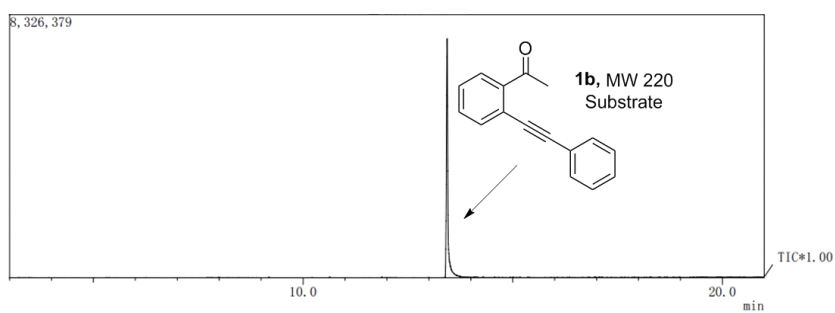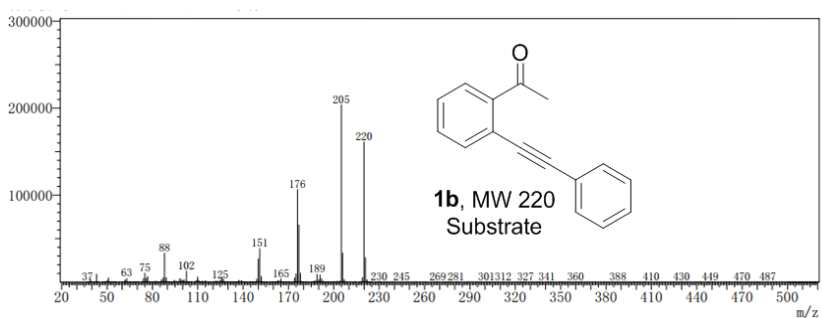

Figure S20. The GC and GC-MS charts of 1b.

1-(2-(phenylethynyl)phenyl)ethan-1-one (**1b**)

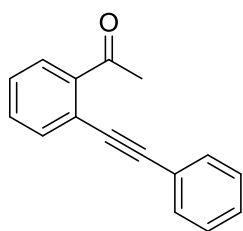

$^1\text{H NMR}$  (400 MHz,  $\text{CDCl}_3$ )  $\delta$  7.75 (dd,  $J = 7.8, 1.0$  Hz, 1H), 7.63 (dd,  $J = 7.7, 0.8$  Hz, 1H), 7.57 – 7.52 (m, 2H), 7.47 (td,  $J = 7.5, 1.2$  Hz, 1H), 7.43–7.34 (m, 4H), 2.79 (s, 3H).

$^1\text{H NMR}$  Spectrum of **1b**

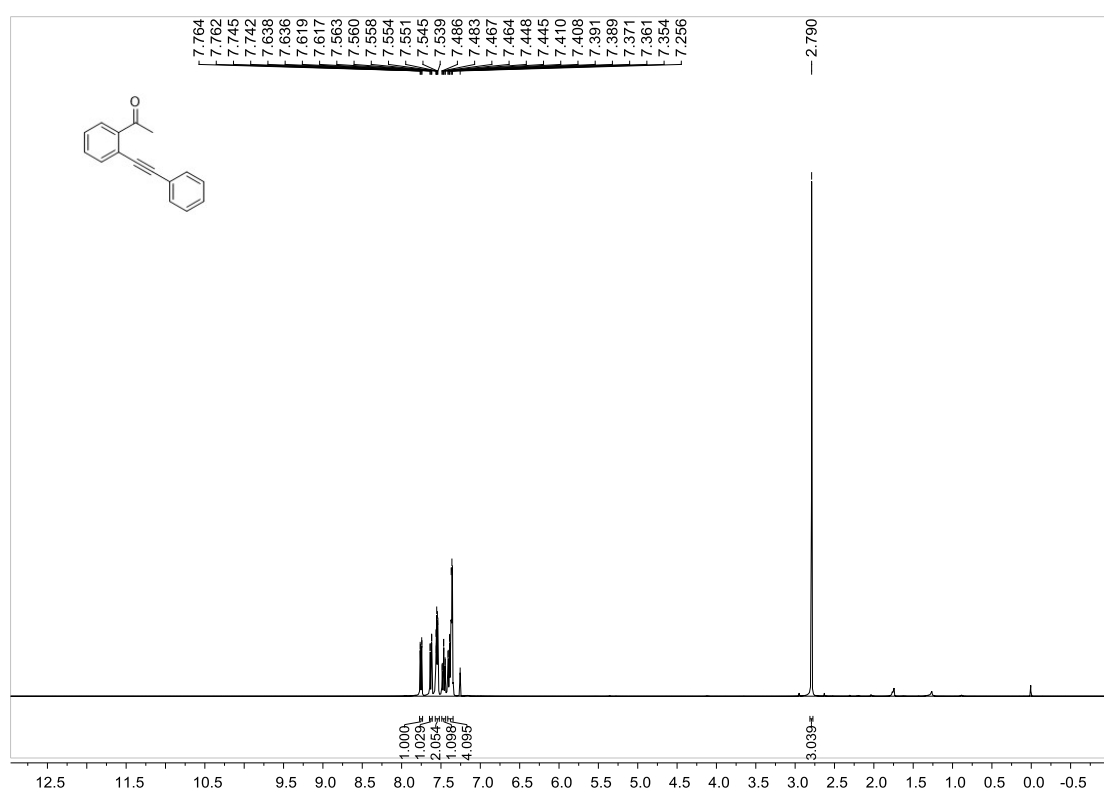

Figure S21. The  $^1\text{H}$  and  $^{13}\text{C}$  NMR Spectrum of **1b**.

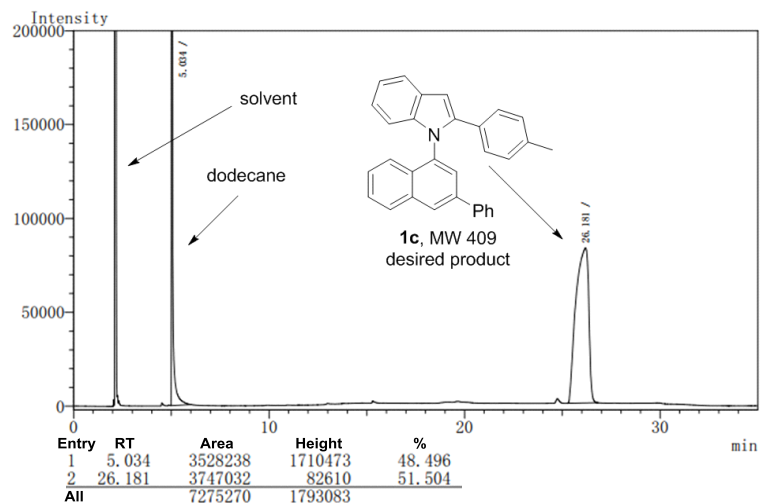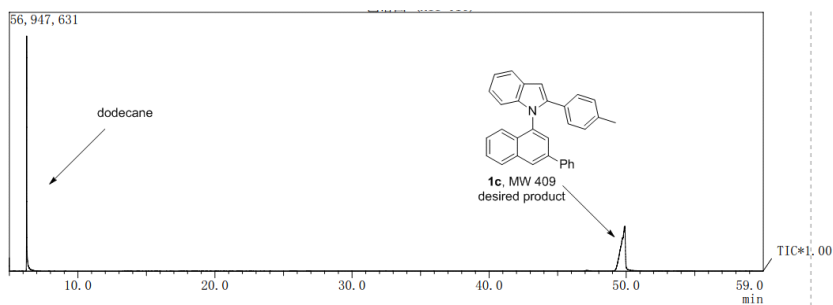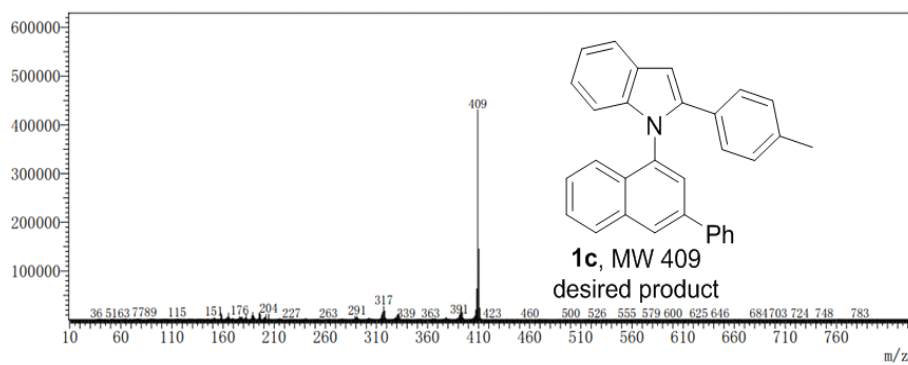

Figure S22. The GC and GC-MS charts of 1c

### 1-(3-phenylnaphthalen-1-yl)-2-(p-tolyl)-1H-indole (1c)

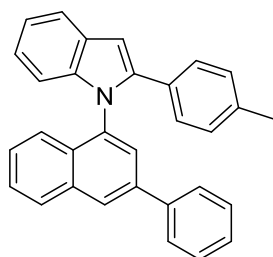

The title compound was prepared according to the general procedure and purified by column chromatography on silica gel and eluted with petroleum ether/dichloromethane (10/1) to afford a white powder in 94% yield (76.9 mg). mp 192–193 °C. <sup>1</sup>H NMR (400 MHz, CDCl<sub>3</sub>) δ 8.19 (s, 1H), 8.04 (d, *J* = 8.2 Hz, 1H), 7.83 (d, *J* = 7.8 Hz, 1H), 7.75–7.71 (m, 1H), 7.68 (d, *J* = 7.5 Hz, 2H), 7.57 (t, *J* = 7.5 Hz, 1H), 7.51 (t, *J* = 7.9 Hz, 3H), 7.42 (t, *J* = 7.4 Hz, 2H), 7.30–7.21 (m, 3H), 7.16 (t, *J* = 7.6 Hz, 1H), 7.01–6.94 (m, 4H), 2.26 (s, 3H). <sup>13</sup>C NMR (101 MHz, CDCl<sub>3</sub>) δ 142.2, 140.1, 139.9, 138.2, 137.1, 135.9, 134.5, 130.4, 129.5, 128.9, 128.8, 128.5, 128.3, 128.0, 127.6, 127.2, 127.0, 126.9, 126.7, 126.0, 123.5, 122.0, 120.5, 120.3, 111.1, 102.8, 21.0. HRMS (EI) *m/z*: [M]<sup>+</sup> calcd for C<sub>31</sub>H<sub>23</sub>N 409.1830; found 409.1828.

### <sup>1</sup>H NMR Spectrum of 1c

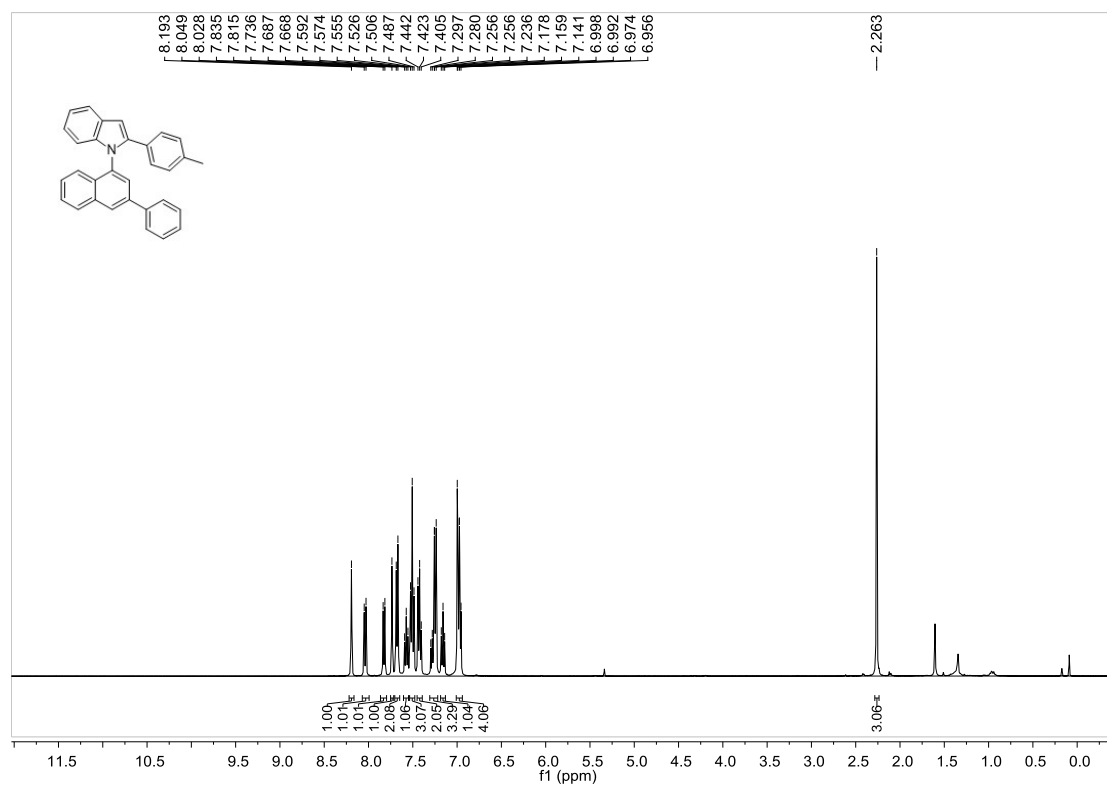

### <sup>13</sup>C NMR Spectrum of **1c**

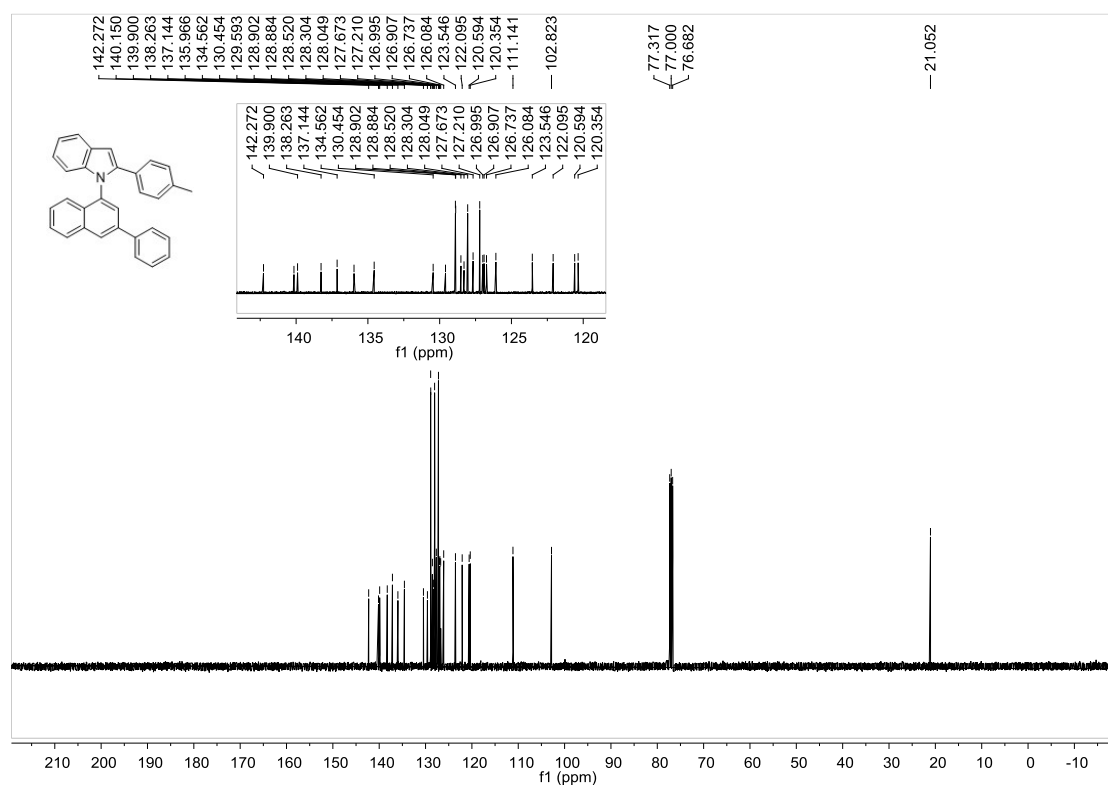

Figure S23. The <sup>1</sup>H and <sup>13</sup>C NMR Spectrum of **1c**

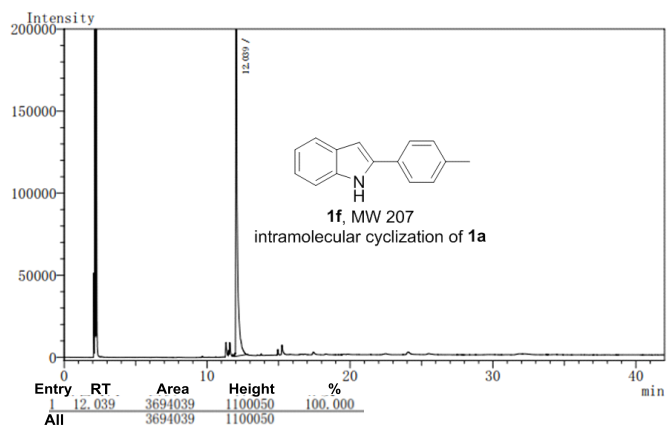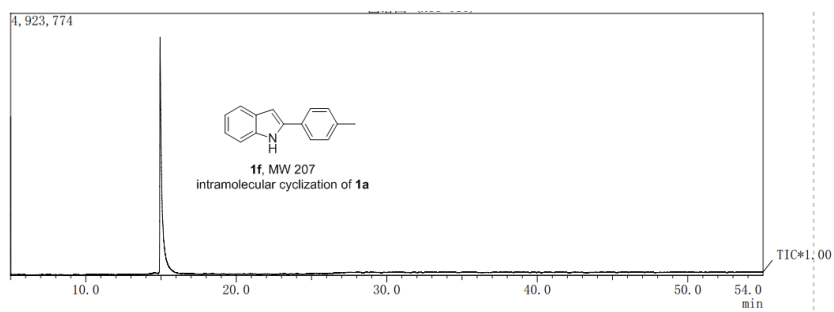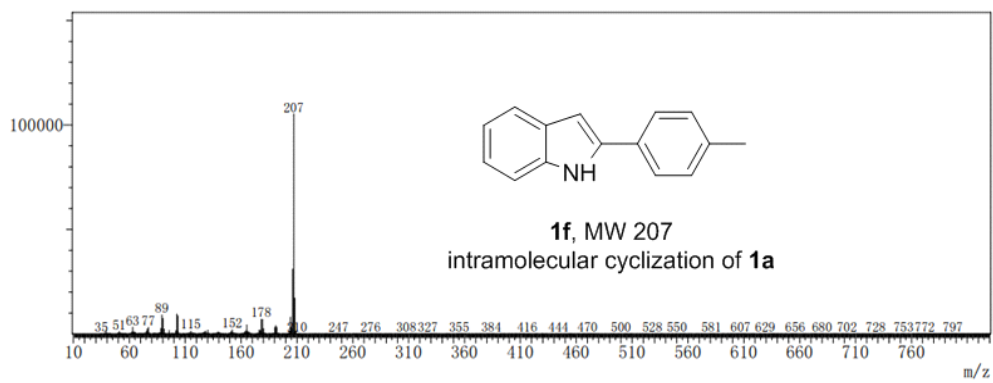

Figure S24. The GC and GC-MS charts of 1f

## 2-(p-tolyl)-1H-indole (**1f**)

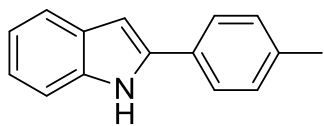

$^1\text{H NMR}$  (400 MHz,  $\text{CDCl}_3$ )  $\delta$  8.32 (s, 1H), 7.64 (d,  $J = 7.7$  Hz, 1H), 7.57 (d,  $J = 7.4$  Hz, 2H), 7.39 (d,  $J = 7.9$  Hz, 1H), 7.29–7.24 (m, 2H), 7.20 (t,  $J = 7.4$  Hz, 1H), 7.14 (t,  $J = 7.3$  Hz, 1H), 6.80 (s, 1H), 2.41 (s, 3H).  $^{13}\text{C NMR}$  (101 MHz,  $\text{CDCl}_3$ )  $\delta$  138.0, 137.6, 136.6, 129.6, 129.5, 129.3, 125.0, 122.0, 120.4, 120.1, 110.7, 99.3, 21.2.

## $^1\text{H NMR}$ Spectrum of **1f**

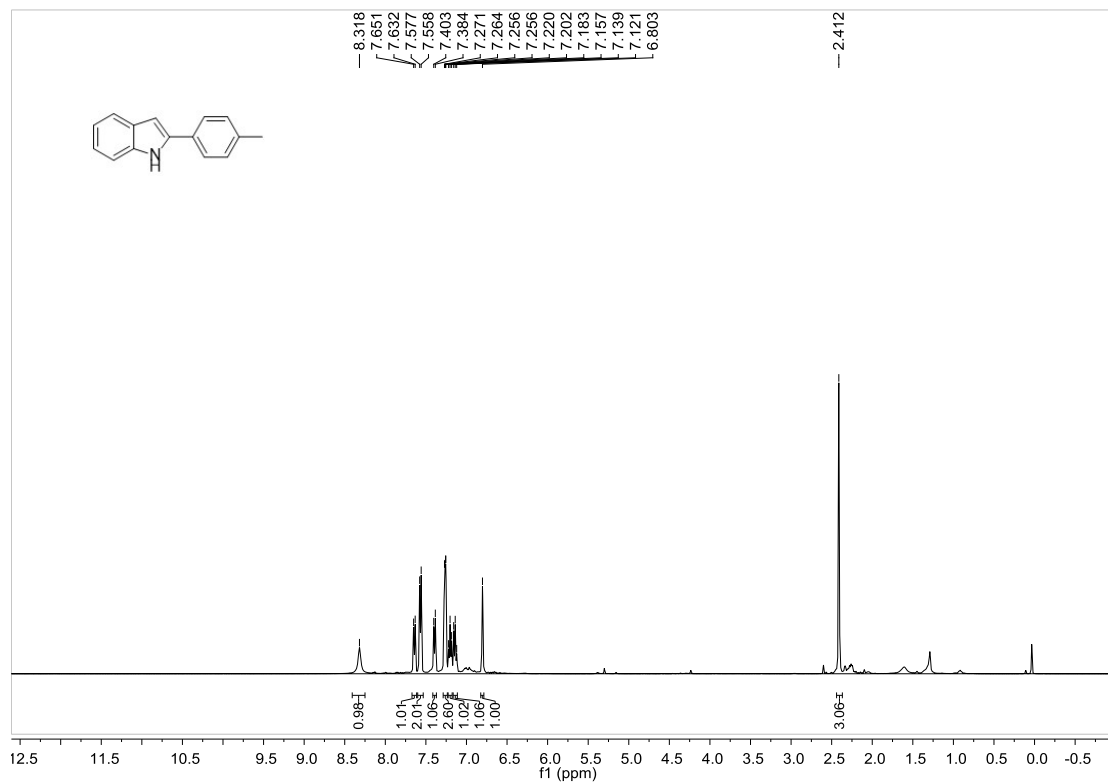



<sup>13</sup>C NMR Spectrum of **1f**

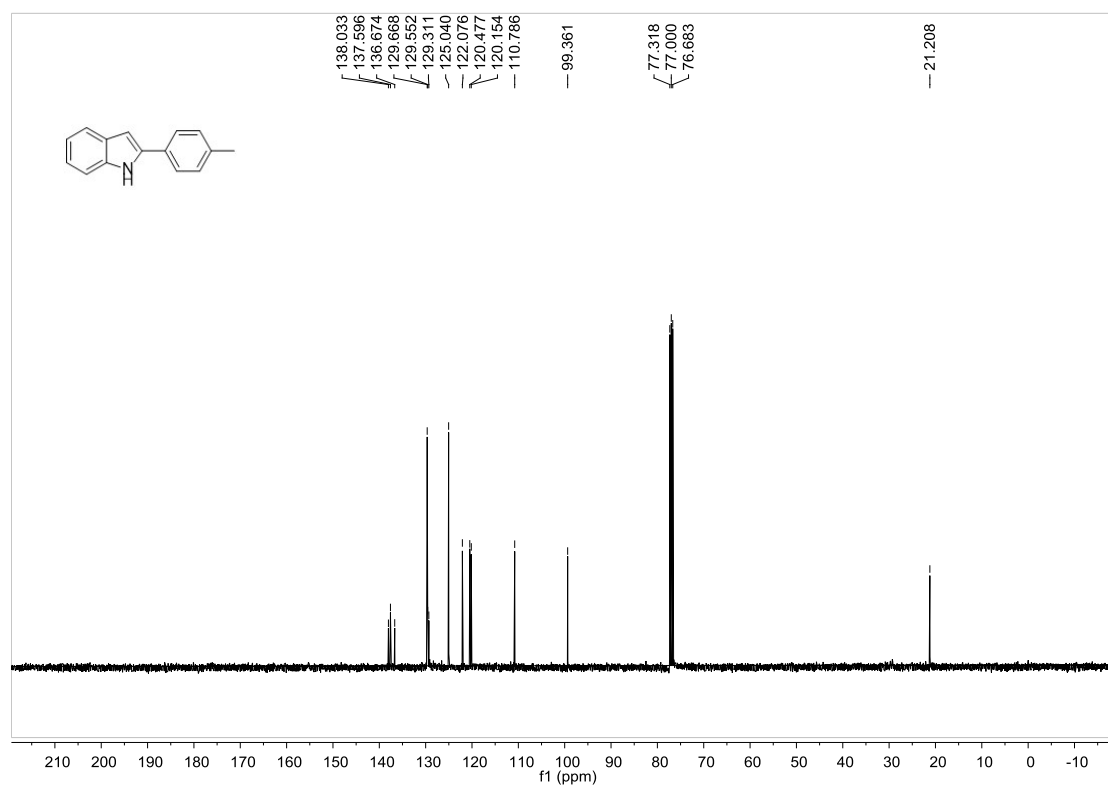

Figure S25. The <sup>1</sup>H and <sup>13</sup>C NMR Spectrum of **1f**

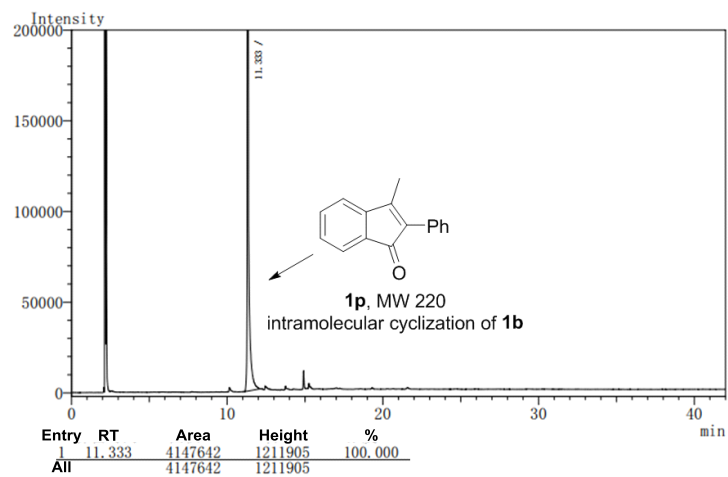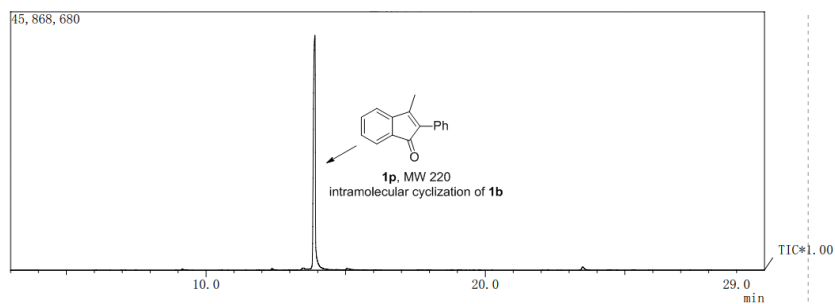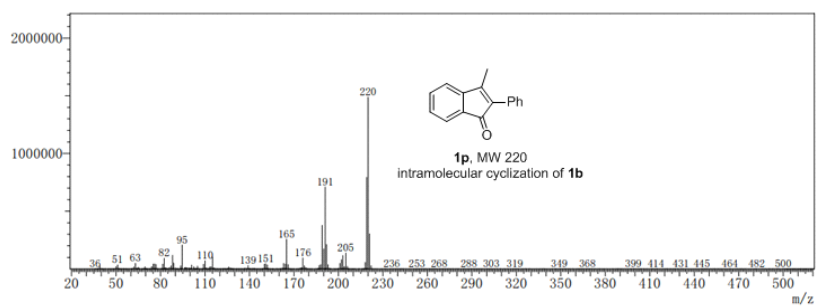

Figure S26. The GC and GC-MS charts of 1p

### 3-methyl-2-phenyl-1H-inden-1-one (**1p**)<sup>15</sup>

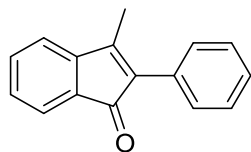

The title compound was prepared according to the procedure (Table S6, entry 5, six parallel experiments were conducted) and purified by column chromatography on silica gel and eluted with petroleum ether/dichloromethane (10/1) to afford a sticky yellow liquid. <sup>1</sup>H NMR (400 MHz, CDCl<sub>3</sub>) δ 7.47 (d, *J* = 7.0 Hz, 1H), 7.44–7.36 (m, 5H), 7.35–7.30 (m, 1H), 7.27–7.20 (m, 1H), 7.14 (d, *J* = 7.1 Hz, 1H), 2.30 (s, 3H). <sup>13</sup>C NMR (101 MHz, CDCl<sub>3</sub>) δ 196.3, 154.6, 145.8, 133.5, 133.4, 131.1, 130.3, 129.5, 128.8, 128.2, 127.6, 122.0, 119.3, 12.5.

### <sup>1</sup>H NMR Spectrum of **1p**

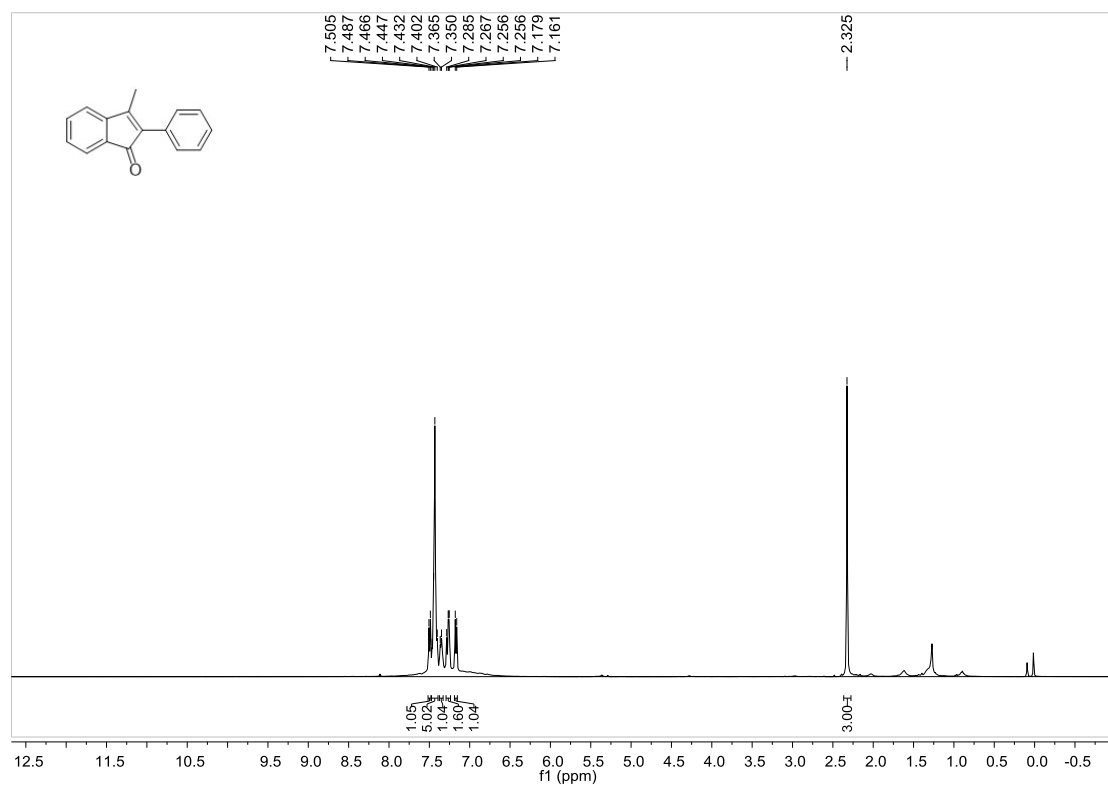

<sup>13</sup>C NMR Spectrum of **1p**

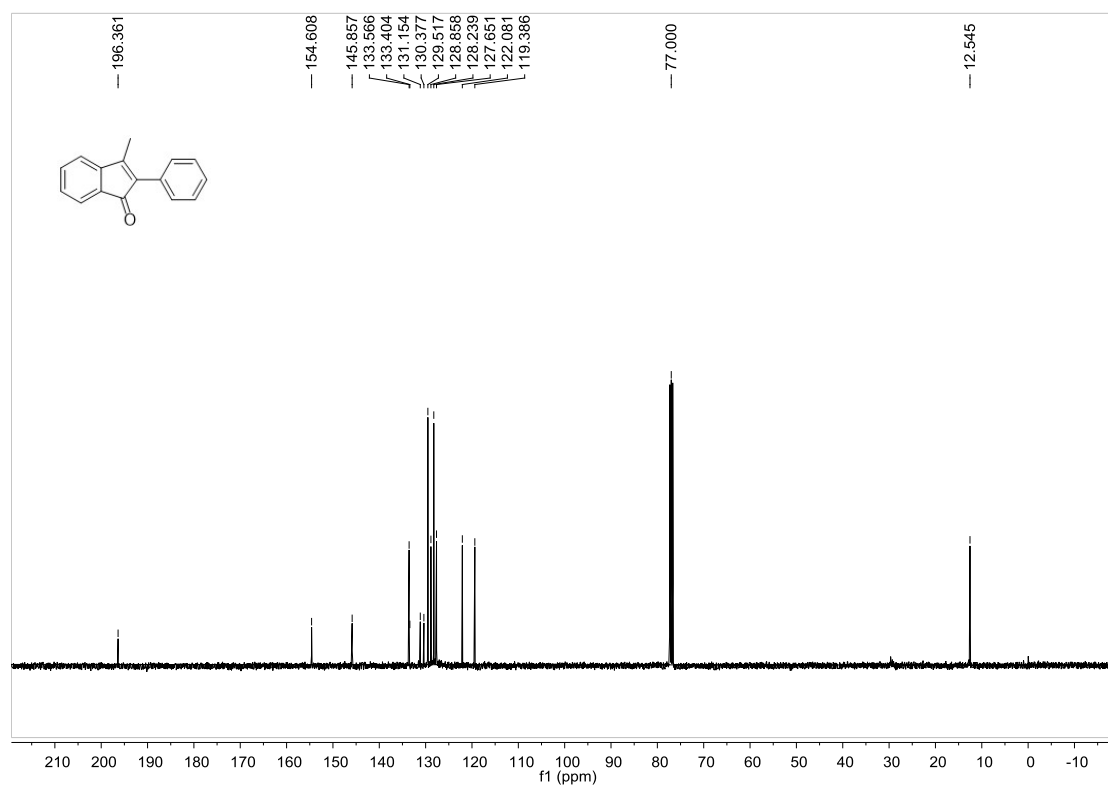

Figure S27. The <sup>1</sup>H and <sup>13</sup>C NMR Spectrum of **1p**

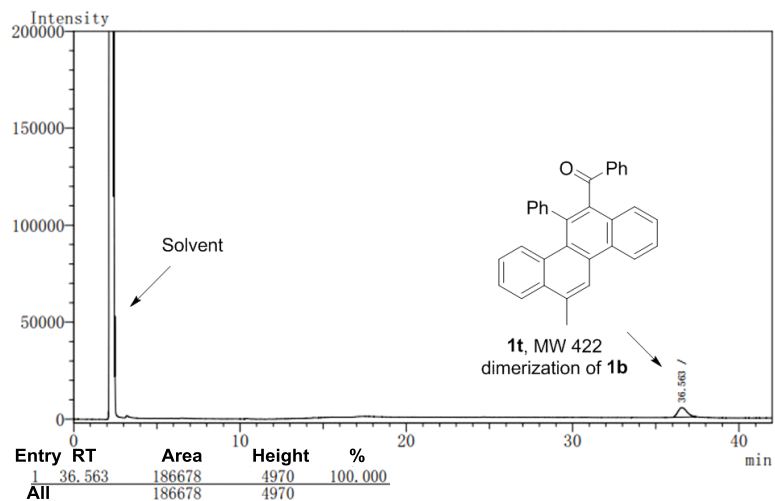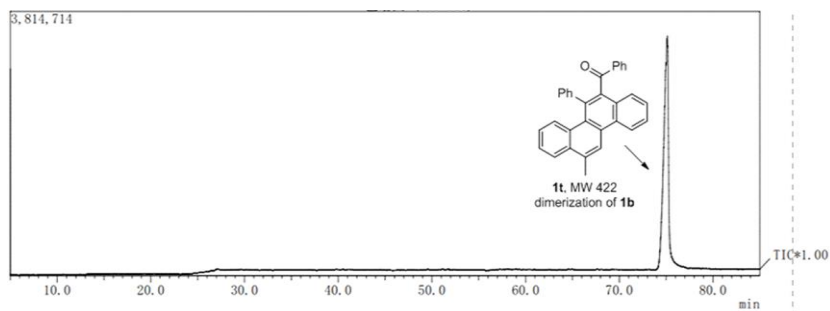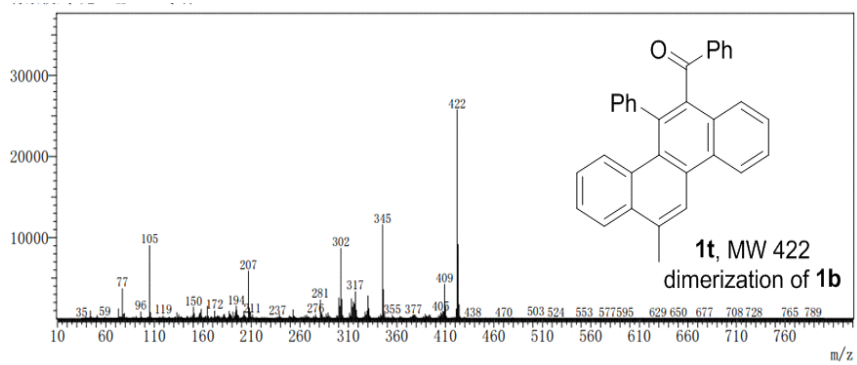

Figure S28. The GC and GC-MS charts of 1t

### (12-methyl-5-phenylchrysen-6-yl)(phenyl)methanone (**1t**)

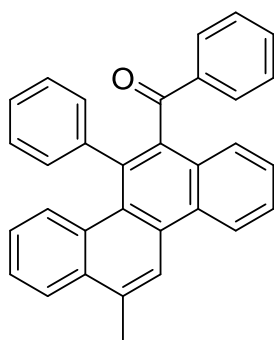

The title compound was prepared according to the procedure (Table S2, entry 4, six parallel experiments were conducted) and purified by column chromatography on silica gel and eluted with petroleum ether/dichloromethane (20/1) to afford a white solid.  $^1\text{H}$  NMR (400 MHz,  $\text{CDCl}_3$ )  $\delta$  8.89 (d,  $J = 8.5$  Hz, 1H), 8.68 (s, 1H), 8.10 (d,  $J = 8.2$  Hz, 1H), 7.78 (d,  $J = 8.2$  Hz, 1H), 7.76–7.70 (m, 2H), 7.65 (d,  $J = 7.5$  Hz, 1H), 7.58–7.52 (m, 1H), 7.51–7.44 (m, 3H), 7.47 (td,  $J = 8.6, 1.1$  Hz, 3H), 7.42 (t,  $J = 7.6$  Hz, 1H), 7.35 (t,  $J = 7.4$  Hz, 1H), 7.21–7.13 (m, 3H), 7.09–7.03 (m, 1H), 6.93 (t,  $J = 7.5$  Hz, 1H), 6.77 (d,  $J = 7.7$  Hz, 1H), 2.93 (s, 3H).  $^{13}\text{C}$  NMR (101 MHz,  $\text{CDCl}_3$ )  $\delta$  200.0, 141.4, 137.9, 137.0, 134.8, 134.5, 133.1, 132.8, 131.4, 131.0, 130.3, 130.0, 129.3, 129.2, 129.0, 128.7, 128.7, 128.1, 128.0, 127.2, 127.2, 126.9, 126.0, 125.9, 125.8, 124.5, 124.1, 123.5, 121.4, 20.6.

### $^1\text{H}$ NMR Spectrum of **1t**

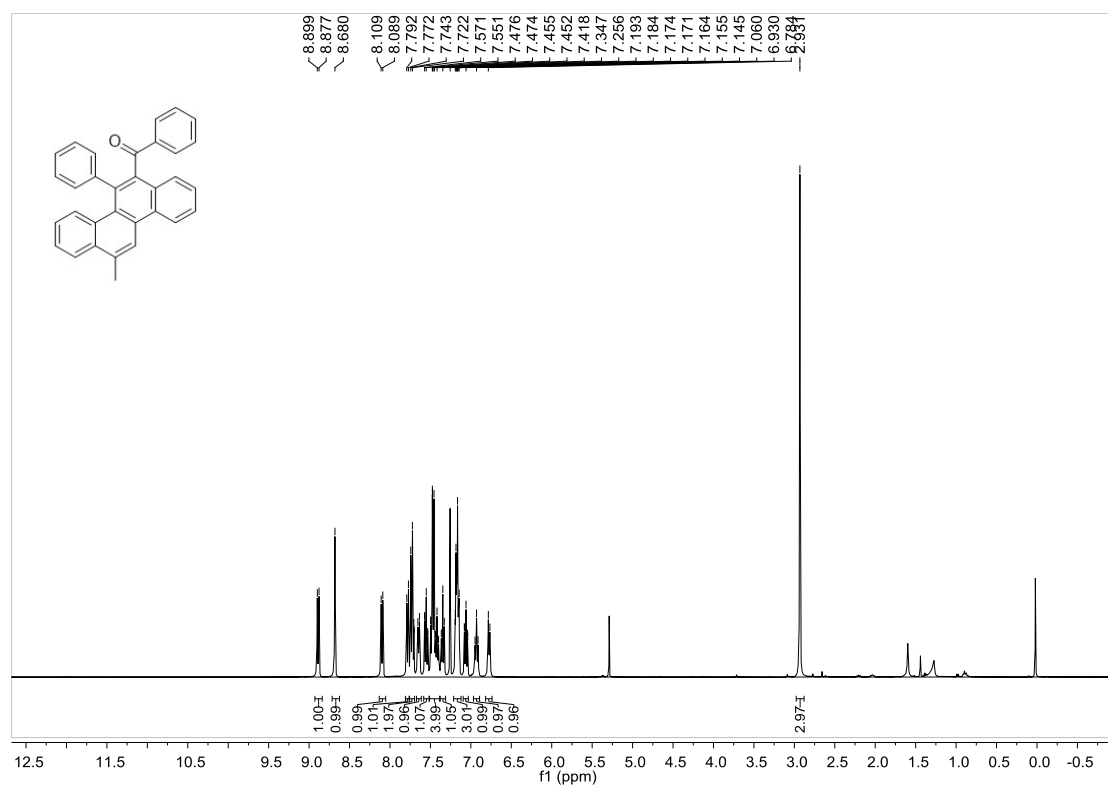

<sup>13</sup>C NMR Spectrum of **1t**

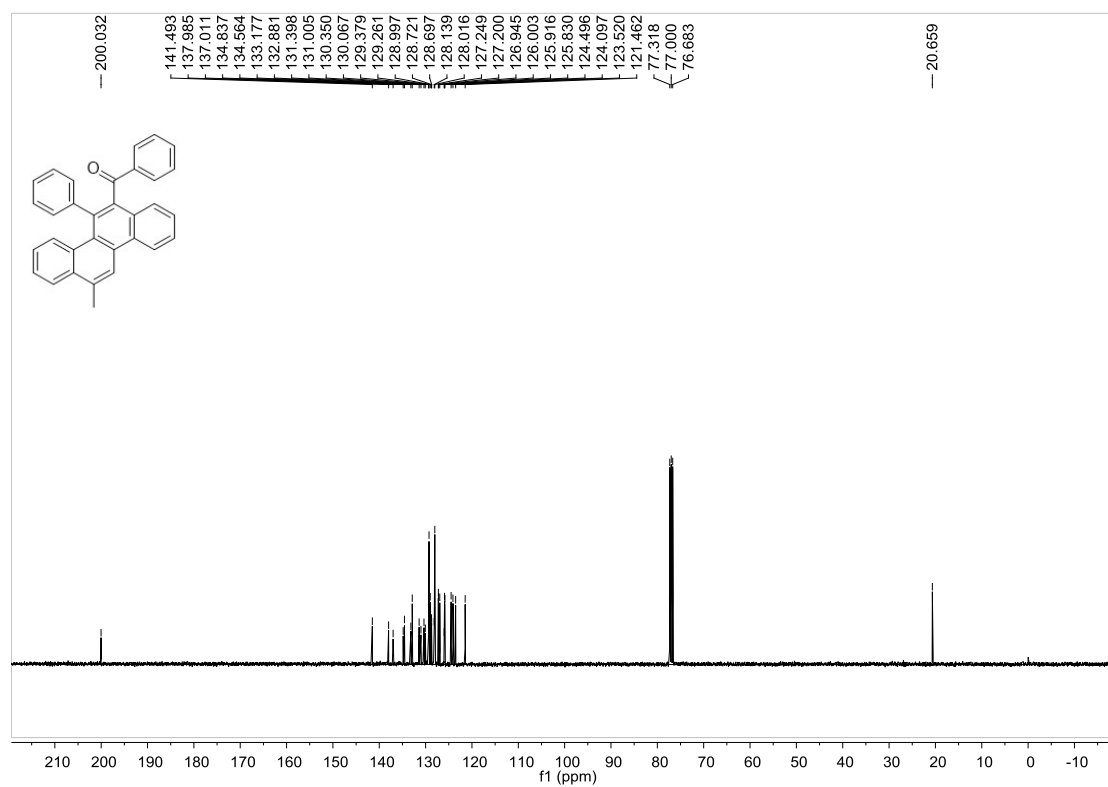

Figure S29. The <sup>1</sup>H and <sup>13</sup>C NMR Spectrum of **1t**

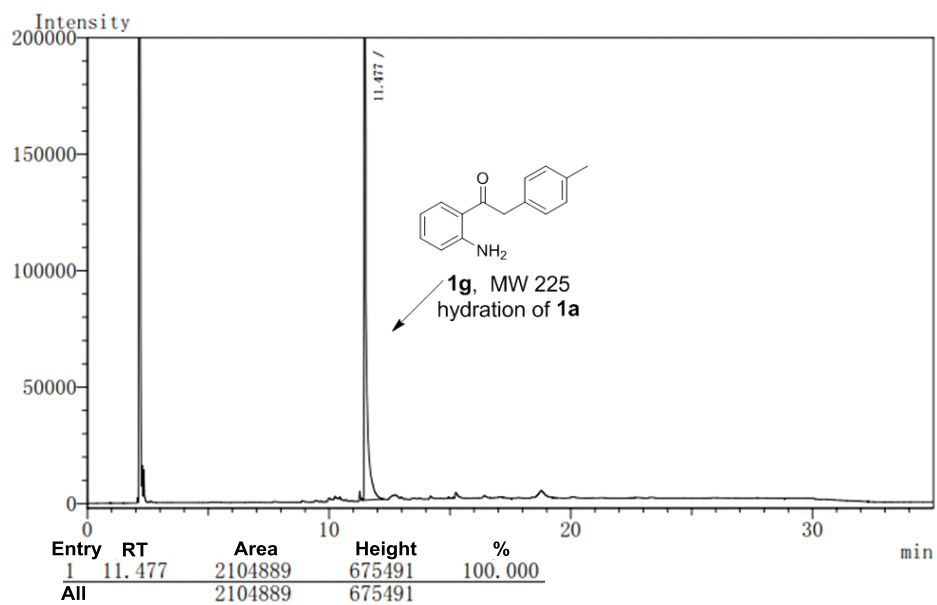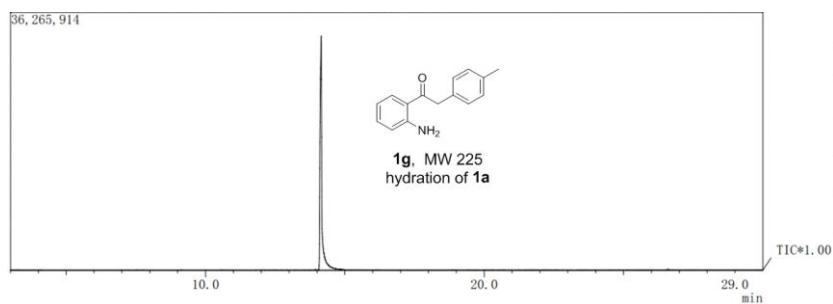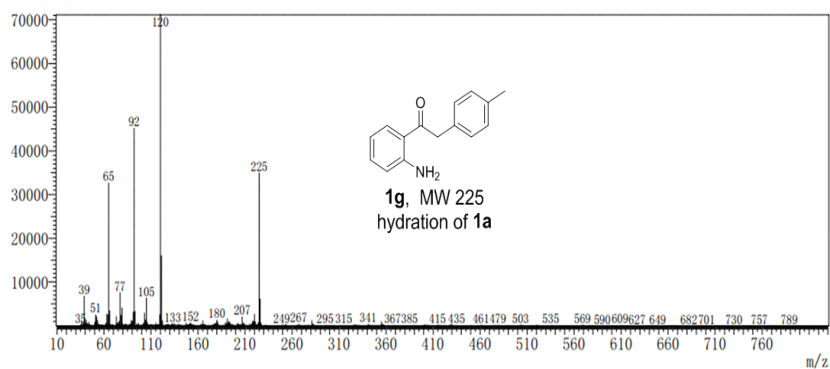

Figure S30. The GC and GC-MS charts of **1g**



**1-(2-aminophenyl)-2-(p-tolyl)ethan-1-one (**1g**)<sup>16</sup>**

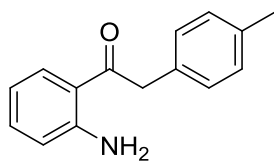

The title compound was prepared according to the procedure (Table S5, entry 2) and purified by column chromatography on silica gel and eluted with petroleum ether/dichloromethane(10/1) to afford a white solid. <sup>1</sup>H NMR (400 MHz, CDCl<sub>3</sub>) δ

7.84 (d, *J* = 8.1 Hz, 1H), 7.28–7.22 (m, 1H), 7.14 (s, 4H), 6.69–6.57 (m, 2H), 6.28 (s, 2H), 4.22 (s, 2H), 2.33 (s, 3H).

<sup>13</sup>C NMR (101 MHz, CDCl<sub>3</sub>) δ 200.1, 150.8, 136.2, 134.3, 132.2, 131.5, 129.2, 129.2, 117.5, 117.3, 115.7, 45.6,

21.0. HRMS (EI) *m/z*: [M]<sup>+</sup> calcd for C<sub>15</sub>H<sub>15</sub>NO 225.1154.

**<sup>1</sup>H NMR Spectrum of **1g****

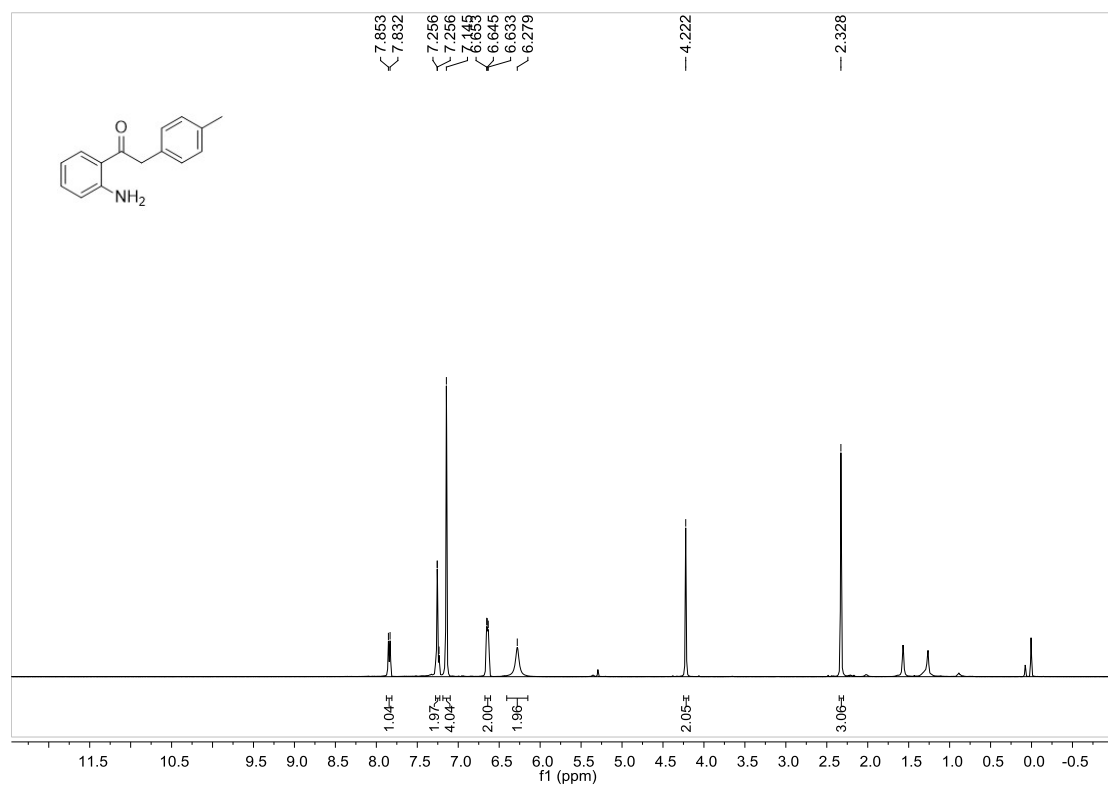

<sup>13</sup>C NMR Spectrum of **1g**

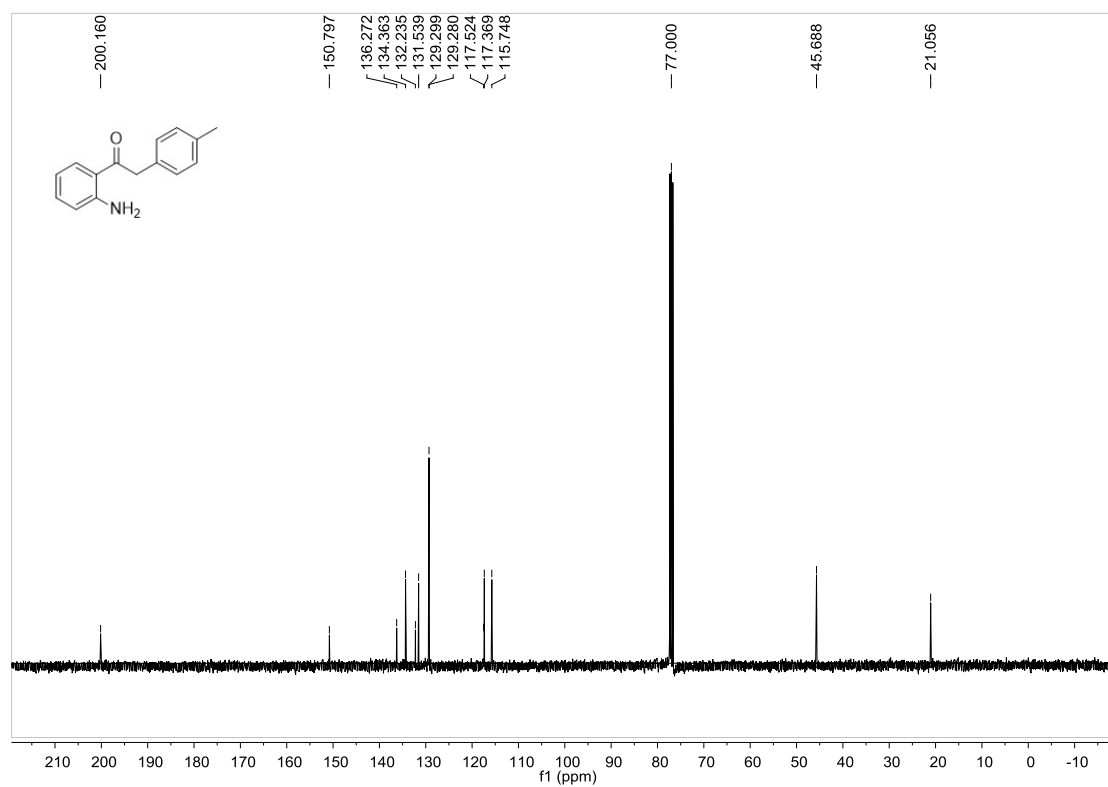

Figure S31. The <sup>1</sup>H and <sup>13</sup>C NMR Spectrum of **1g**

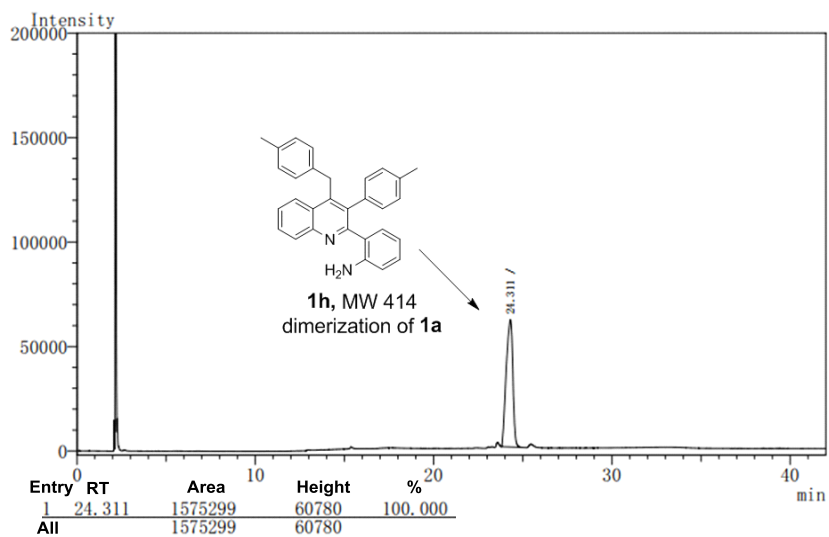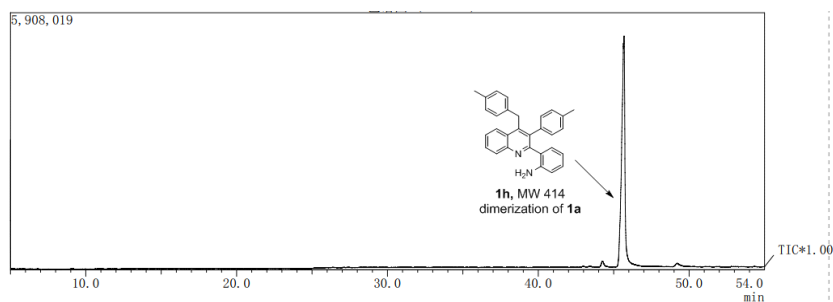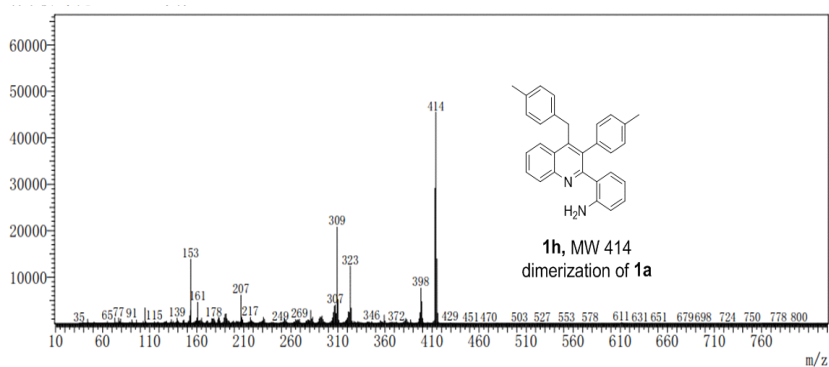

Figure S32. The GC and GC-MS charts of **1h**

2-(4-(4-methylbenzyl)-3-(p-tolyl)quinolin-2-yl)aniline (**1h**)<sup>3</sup>

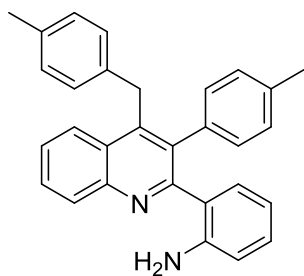

The title compound was prepared according to the procedure of Table S5, entry 2 (six parallel experiments were conducted), and purified by column chromatography on silica gel and eluted with petroleum ether/dichloromethane(10/1) to afford a light yellow solid, mp 200-201 °C. <sup>1</sup>H NMR (400 MHz, CDCl<sub>3</sub>) δ 8.19 (d, *J* = 8.4 Hz, 1H), 7.96 (d, *J* = 8.4 Hz, 1H),

7.69 (t, *J* = 7.5 Hz, 1H), 7.48 (t, *J* = 7.5 Hz, 1H), 7.09–6.97 (m, 7H), 6.94 (d, *J* = 7.4 Hz, 2H), 6.80 (d, *J* = 7.5 Hz, 1H), 6.71 (d, *J* = 8.0 Hz, 1H), 6.48 (t, *J* = 7.4 Hz, 1H), 4.39 (s, 2H), 4.29 (s, 2H), 2.30 (d, *J* = 12.8 Hz, 6H). <sup>13</sup>C NMR (101 MHz, CDCl<sub>3</sub>) δ 158.7, 146.8, 144.8, 144.6, 137.0, 136.5, 135.8, 135.3, 135.1, 131.1, 129.8, 129.6, 129.1, 128.9, 128.4, 128.4, 127.9, 126.7, 126.6, 126.2, 125.2, 117.5, 116.2, 35.1, 21.1, 20.8.

### <sup>1</sup>H NMR Spectrum of **1h**

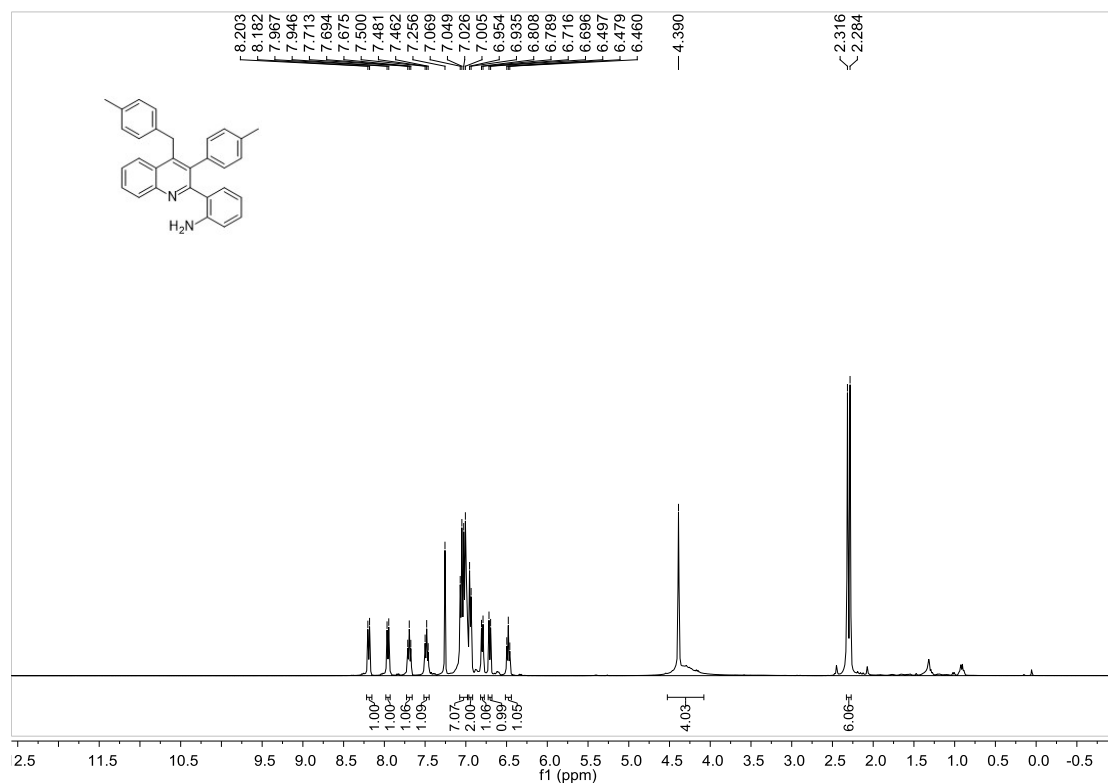

### <sup>13</sup>C NMR Spectrum of **1h**

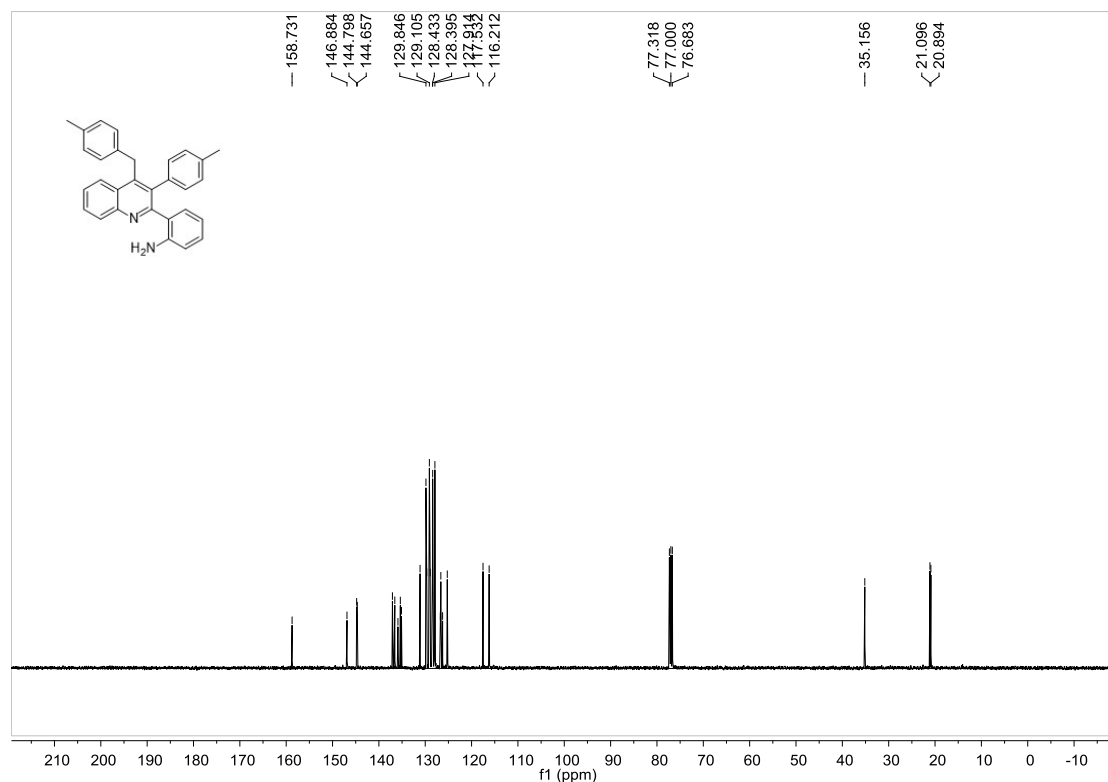

Figure S33. The <sup>1</sup>H and <sup>13</sup>C NMR Spectrum of 1h

### 3.3. General Procedure for the Synthesis of C–N Axial Biaryl Compounds

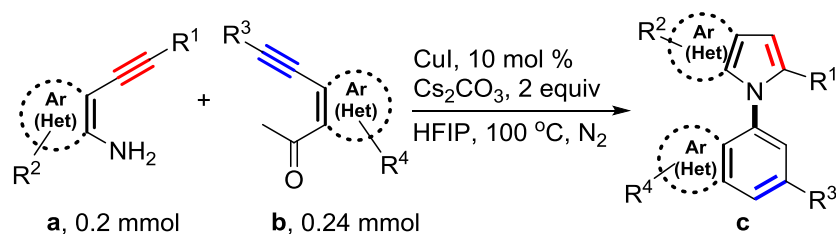

A Schlenk tube of 25 mL equipped with a magnetic stir bar was charged with CuI (3.8 mg, 0.02 mmol, 10 mol %), Cs<sub>2</sub>CO<sub>3</sub> (130 mg, 0.4 mmol, 2.0 equiv) in HFIP (1.0 mL); then, *o*-amino arylkyne **a** (0.2 mmol), and *o*-carbonyl arylalkyne **b** (0.24 mmol, 1.2 equiv) were added. The reaction mixture was stirred (800 r/min in IKA RCT basic) at 100 °C for 24 h under N<sub>2</sub>. After completion of the reaction, the reaction mixture was cooled to room temperature. The crude product was purified by flash column chromatography on silica gel to give the desired C–N axial biaryl compounds.

### 3.4. Gram-scale Synthesis

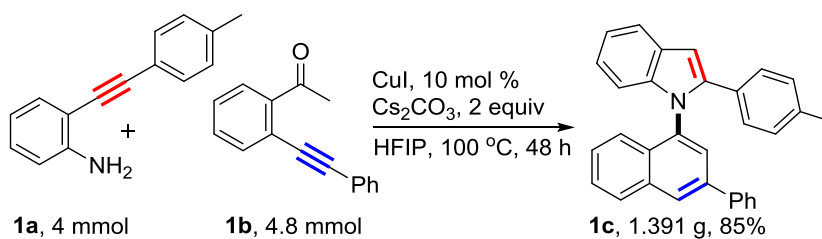

A Schlenk tube of 100 mL equipped with a magnetic stir bar was charged with CuI (0.4 mmol, 10 mol %), Cs<sub>2</sub>CO<sub>3</sub> (8 mmol, 2.0 equiv) in HFIP (20 mL); then, 2-(*p*-tolylethynyl)aniline **1a** (4.0 mmol) and 2-phenylethynylacetophenone **1b** (4.8 mmol, 1.2 equiv) were added. The reaction mixture was heated at 100°C for 48 h under N<sub>2</sub>. After completion of the reaction, the reaction mixture was cooled to room temperature. The solvent was evaporated under the reduced pressure and the residue was purified by column chromatography on silica gel and eluted with petroleum ether/ethyl acetate (20/1) to afford the desired 2-phenyl-1-(3-phenylnaphthalen-1-yl)-1H-indole **1c** in 85% yield (1.391 g).

## 4. Investigations of the Reaction Mechanism

### 4.1 Control Experiments

Scheme S3. Investigations of the cyclization of **1a** and **1b**

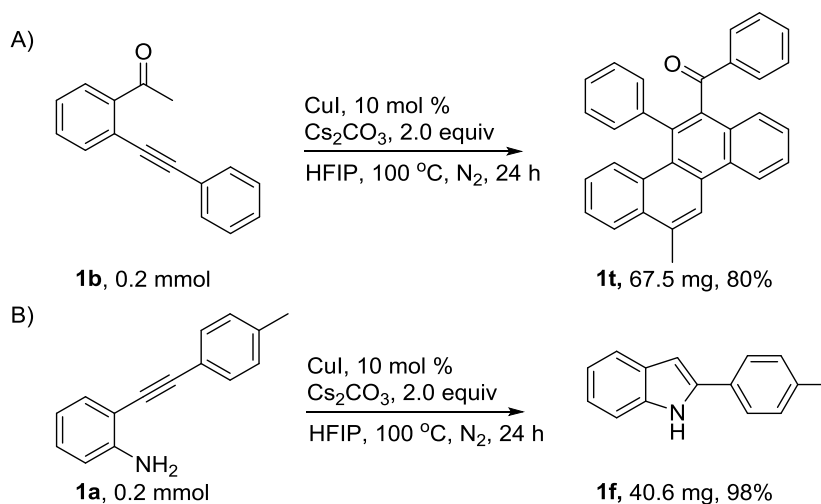

A) A schlenk tube of 25 mL equipped with a magnetic stir bar was charged with CuI (3.8 mg, 0.02 mmol, 10 mol %), Cs<sub>2</sub>CO<sub>3</sub> (130 mg, 0.4 mmol, 2.0 equiv) in HFIP (1.0 mL); then, *ortho*-alkynylacetophenone (**1b**, 0.2 mmol) was added. The reaction mixture was stirred (800 r/min in IKA RCT basic) at 100 °C for 24 h under N<sub>2</sub>. After completion of the reaction, the reaction mixture was cooled to room temperature. The solvent was evaporated under the reduced pressure and the residue was purified by column chromatography on silica gel and eluted with petroleum ether/ethyl acetate (20/1) to afford the (12-methyl-5-phenylchrysen-6-yl)(phenyl)methanone<sup>10</sup> in 80% yield (**1t**, 67.5 mg) as a off-white powder. <sup>1</sup>H NMR (400 MHz, CDCl<sub>3</sub>) δ 8.89 (d, *J* = 8.5 Hz, 1H), 8.68 (s, 1H), 8.10 (d, *J* = 8.2 Hz, 1H), 7.78 (d, *J* = 8.2 Hz, 1H), 7.76–7.70 (m, 2H), 7.65 (d, *J* = 7.5 Hz, 1H), 7.58–7.52 (m, 1H), 7.51–7.44 (m, 3H), 7.47 (td, *J* = 8.6, 1.1 Hz, 3H), 7.42 (t, *J* = 7.6 Hz, 1H), 7.35 (t, *J* = 7.4 Hz, 1H), 7.21–7.13 (m, 3H), 7.09–7.03 (m, 1H), 6.93 (t, *J* = 7.5 Hz, 1H), 6.77 (d, *J* = 7.7 Hz, 1H), 2.93 (s, 3H). <sup>13</sup>C NMR (101 MHz, CDCl<sub>3</sub>) δ 200.0, 141.4, 137.9, 137.0, 134.8, 134.5, 133.1, 132.8, 131.4, 131.0, 130.3, 130.0, 129.3, 129.2, 129.0, 128.7, 128.7, 128.1, 128.0, 127.2, 127.2, 126.9, 126.0, 125.9, 125.8, 124.5, 124.1, 123.5, 121.4, 20.6.

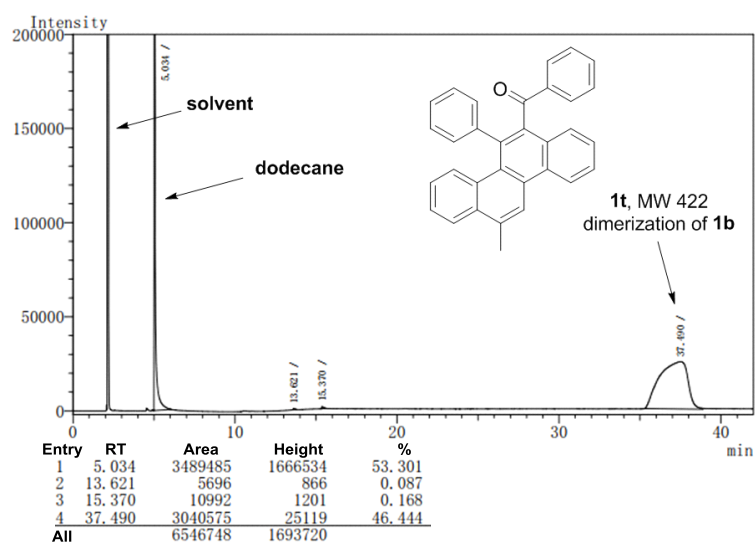

**Figure S34.** The GC chart of the crude reaction mixture of A.

B) A Schlenk tube of 25 mL equipped with a magnetic stir bar was charged with CuI (3.8 mg, 0.02 mmol, 10 mol %), Cs<sub>2</sub>CO<sub>3</sub> (130 mg, 0.4 mmol, 2.0 equiv) in HFIP (1.0 mL); then, 2-(*p*-tolylethynyl)aniline (**1a**, 0.2 mmol) was added. The reaction mixture was stirred (800 r/min in IKA RCT basic) at 100 °C for 24 h under N<sub>2</sub>. After completion of the reaction, the reaction mixture was cooled to room temperature. The solvent was evaporated under the reduced pressure and the residue was purified by column chromatography on silica gel and eluted with petroleum ether/ethyl acetate (20/1) to afford the 2-(*p*-tolyl)-1H-indole<sup>2</sup> in 98% yield (**1f**, 40.6 mg) as a off-white powder. <sup>1</sup>H NMR (400 MHz, CDCl<sub>3</sub>) δ 8.32 (s, 1H), 7.64 (d, *J* = 7.7 Hz, 1H), 7.57 (d, *J* = 7.4 Hz, 2H), 7.39 (d, *J* = 7.9 Hz, 1H), 7.29–7.24 (m, 2H), 7.20 (t, *J* = 7.4 Hz, 1H), 7.14 (t, *J* = 7.3 Hz, 1H), 6.80 (s, 1H), 2.41 (s, 3H). <sup>13</sup>C NMR (101 MHz, CDCl<sub>3</sub>) δ 138.0, 137.6, 136.6, 129.6, 129.5, 129.3, 125.0, 122.0, 120.4, 120.1, 110.7, 99.3, 21.2.

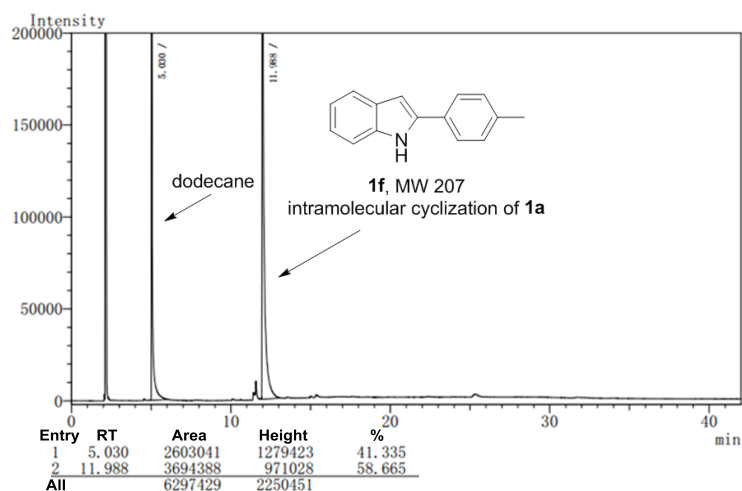

**Figure S35.** The GC chart of the crude reaction mixture of B



**Scheme S4. Investigations of the condensation reaction of amines and ketones**

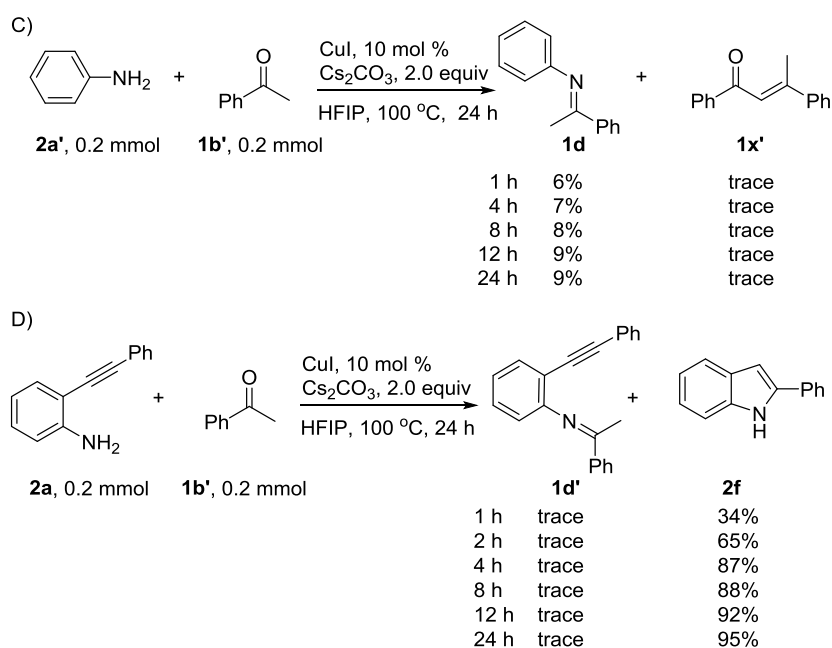

C) A Schlenk tube of 25 mL equipped with a magnetic stir bar was charged with CuI (3.8 mg, 0.02 mmol, 10 mol %), Cs<sub>2</sub>CO<sub>3</sub> (130 mg, 0.4 mmol, 2.0 equiv) in HFIP (1.0 mL); then, anilines (**2a'**, 0.2 mmol) and acetophenone (**1b'**, 0.24 mmol, 1.2 equiv) were added. The reaction mixture was stirred (800 r/min in IKA RCT basic) at 100 °C for 1 h, 2 h, 4 h, 8 h, 12 h, and 24 h under N<sub>2</sub>.

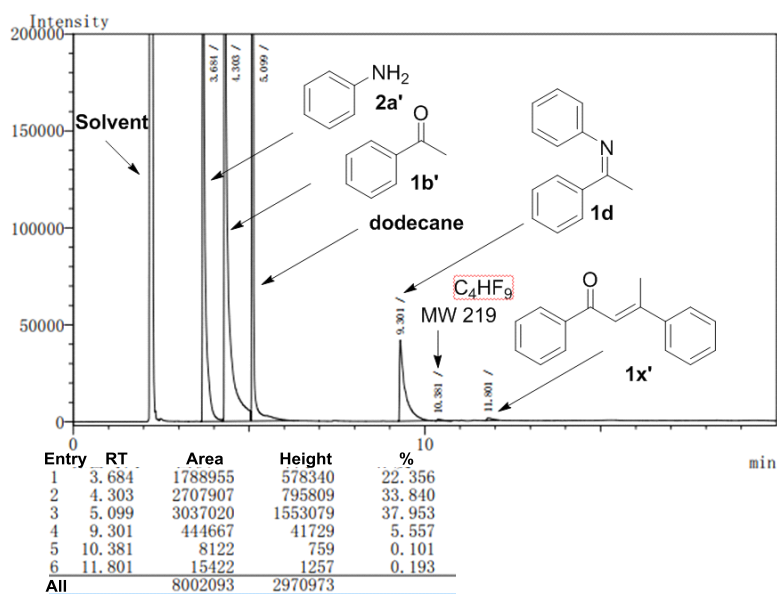

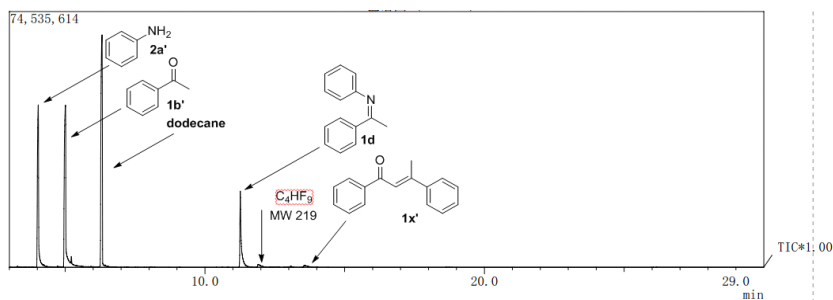

Figure S36. The GC and GC-MS charts of the crude reaction mixture of C for 24 h

D) A Schlenk tube of 25 mL equipped with a magnetic stir bar was charged with CuI (3.8 mg, 0.02 mmol, 10 mol %), Cs<sub>2</sub>CO<sub>3</sub> (130 mg, 0.4 mmol, 2.0 equiv) in HFIP (1.0 mL); then, *ortho*-alkynylanilines (**2a**, 0.2 mmol) and acetophenone (**1b'**, 0.24 mmol, 1.2 equiv) were added. The reaction mixture was stirred (800 r/min in IKA RCT basic) at 100 °C for 1 h, 2 h, 4 h, 8 h, 12 h, and 24 h under N<sub>2</sub>.

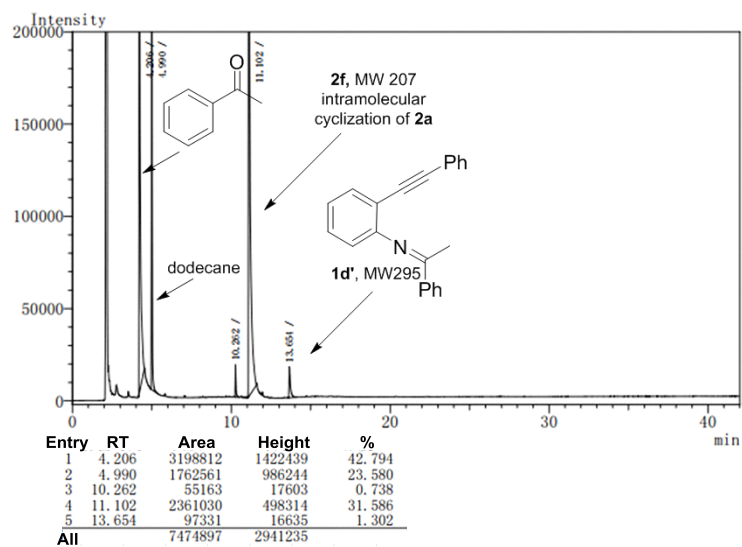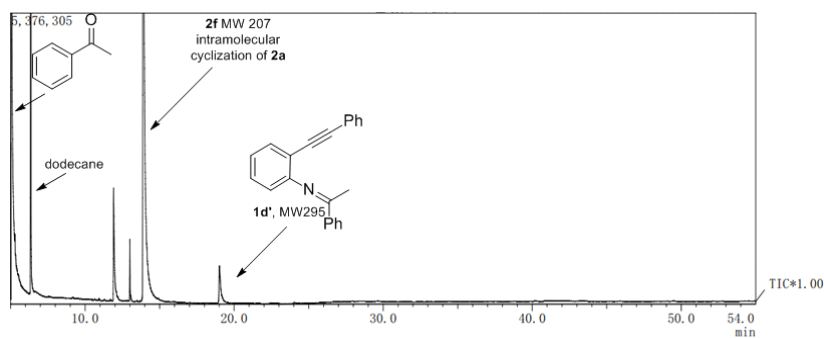

Figure S37. The GC and GC-MS charts of the crude reaction mixture of D for 24 h

**Scheme S5. Investigations of the cyclization sequence**

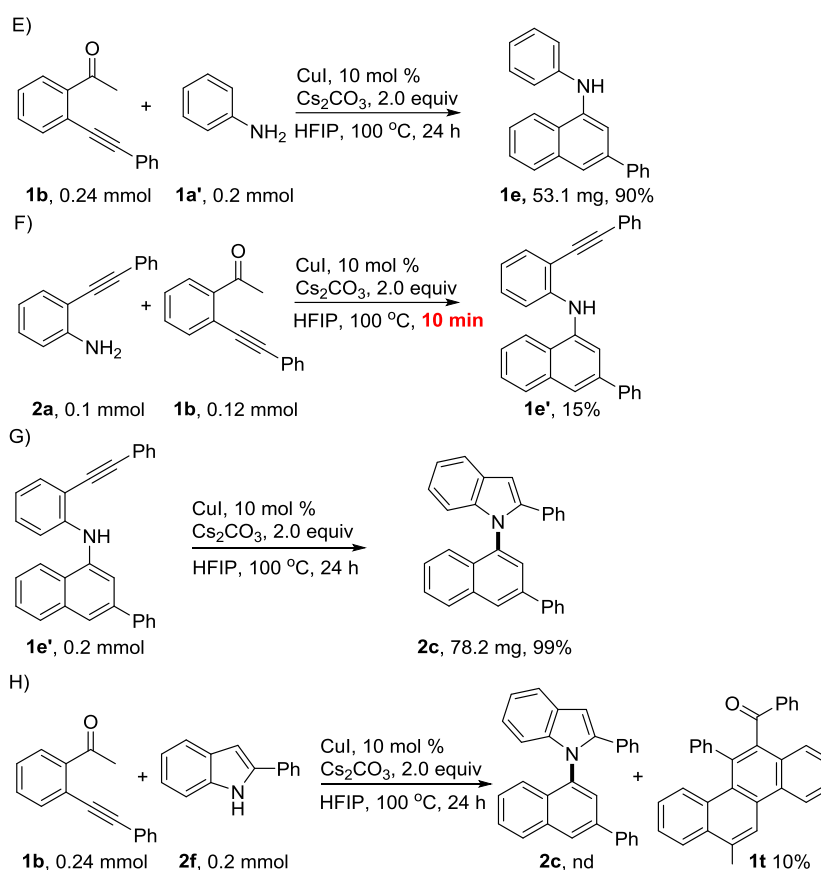

E) A Schlenk tube of 25 mL equipped with a magnetic stir bar was charged with CuI (3.8 mg, 0.02 mmol, 10 mol %), Cs<sub>2</sub>CO<sub>3</sub> (130 mg, 0.4 mmol, 2.0 equiv) in HFIP (1.0 mL); then, aniline (**1a'**, 0.2 mmol), and *ortho*-alkynylacetophenone (**1b**, 0.24 mmol, 1.2 equiv) were added. The reaction mixture was stirred (800 r/min in IKA RCT basic) at 100 °C for 24 h under N<sub>2</sub>. After completion of the reaction, the reaction mixture was cooled to room temperature. The crude product was purified by flash column chromatography on silica gel to give the desired N,3-diphenyl-1-naphthylamine<sup>11</sup> in 90% yield (**1e**, 53.1 mg). <sup>1</sup>H NMR (400 MHz, CDCl<sub>3</sub>) δ 8.06 (d, *J* = 8.3 Hz, 1H), 7.96 (d, *J* = 8.1 Hz, 1H), 7.83–7.81 (m, 1H), 7.73 (d, *J* = 7.2 Hz, 3H), 7.60–7.54 (m, 1H), 7.51 (t, *J* = 7.7 Hz, 3H), 7.42 (t, *J* = 7.3 Hz, 1H), 7.34 (t, *J* = 7.8 Hz, 2H), 7.11 (d, *J* = 7.8 Hz, 2H), 7.00 (t, *J* = 7.3 Hz, 1H), 6.02 (s, 1H). <sup>13</sup>C NMR (101 MHz, CDCl<sub>3</sub>) δ 144.5, 140.9, 139.2, 138.8, 134.9, 129.3, 128.8, 128.7, 127.3, 127.2, 126.7, 126.5, 125.6, 121.6, 120.7, 120.5, 117.4, 115.1.

F) A Schlenk tube of 25 mL equipped with a magnetic stir bar was charged with CuI (1.9 mg, 0.01 mmol, 10 mol %), Cs<sub>2</sub>CO<sub>3</sub> (66 mg, 0.2 mmol, 2.0 equiv) in HFIP (1.0 mL); then, (0.1 mmol), and 2'-phenylethynylacetophenone **1b** (0.12 mmol, 1.2 equiv) were added. The reaction mixture was stirred (800 r/min in

IKA RCT basic) at 100 °C for 10min under N<sub>2</sub>. After completion of the reaction, the reaction mixture was cooled to room temperature. The crude product was purified by flash column chromatography on silica gel to give the desired **1e'** in 15% yield (29.6 mg from five parallel experiments). mp 165-167 °C. A white solid. <sup>1</sup>H NMR (400 MHz, CDCl<sub>3</sub>) δ 8.11 (d, *J* = 8.3 Hz, 1H), 7.96 (d, *J* = 7.9 Hz, 1H), 7.89 (s, 1H), 7.83 (s, 1H), 7.73 (d, *J* = 7.6 Hz, 2H), 7.58–7.44 (m, 7H), 7.42-7.33 (m, 4H), 7.17 (t, *J* = 7.7 Hz, 1H), 7.04 (d, *J* = 8.3 Hz, 1H), 6.91 (s, 1H), 6.84 (t, *J* = 7.4 Hz, 1H). <sup>13</sup>C NMR (101 MHz, CDCl<sub>3</sub>) δ 146.3, 140.8, 138.8, 137.8, 135.0, 132., 131.5, 129.6, 128.8, 128.4, 128.0, 127.5, 127.3, 126.6, 126.1, 123.0, 122.2, 121.9, 118.8, 118.4, 113.5, 109.6, 95.8, 85.7. HRMS (EI) *m/z*: [M]<sup>+</sup> calcd for C<sub>30</sub>H<sub>20</sub>N 395.1674; found 395.1671.

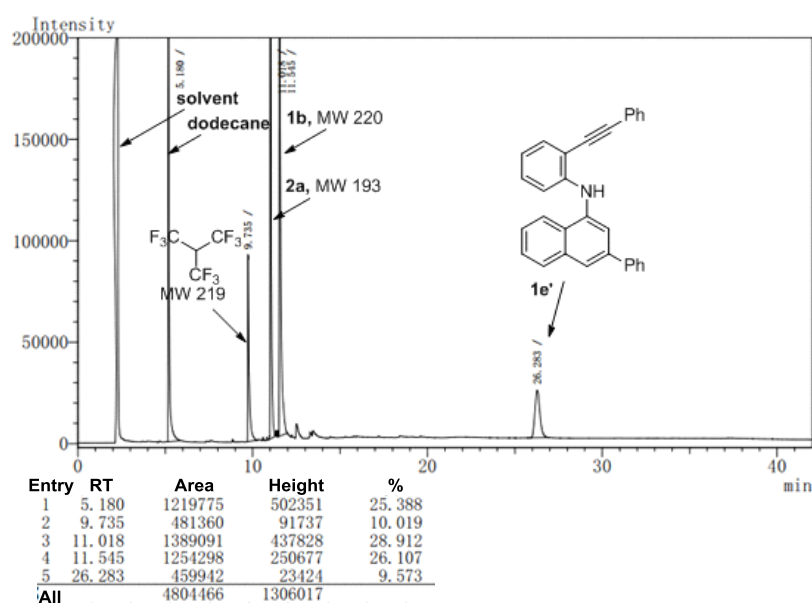

Figure S38. The GC and GC-MS charts of the crude reaction mixture of F for 10 min

G) A Schlenk tube of 25 mL equipped with a magnetic stir bar was charged with CuI (3.8 mg, 0.02 mmol, 10 mol %), Cs<sub>2</sub>CO<sub>3</sub> (130 mg, 0.4 mmol, 2.0 equiv) in HFIP (1.0 mL); then, 3-phenyl-N-(2-(phenylethynyl)phenyl)naphthalen-1-amine (**1e'**, 0.2 mmol) was added. The reaction mixture was stirred (800 r/min in IKA RCT basic) at 100 °C for 24 h under N<sub>2</sub>. After completion of the reaction, the reaction mixture was cooled to room temperature. The crude product was purified by flash column chromatography on silica gel to give the desired product **2e** in 99% yield (78.2 mg).

H) A Schlenk tube of 25 mL equipped with a magnetic stir bar was charged with CuI (3.8 mg, 0.02 mmol, 10 mol %), Cs<sub>2</sub>CO<sub>3</sub> (130 mg, 0.4 mmol, 2.0 equiv) in HFIP (1.0 mL); then, 2-phenyl indoles (**2f**, 0.2 mmol), and *ortho*-

alkynylacetophenone (**1b**, 0.24 mmol, 1.2 equiv) were added. The reaction mixture was stirred (800 r/min in IKA RCT basic) at 100 °C for 24 h under N<sub>2</sub>.

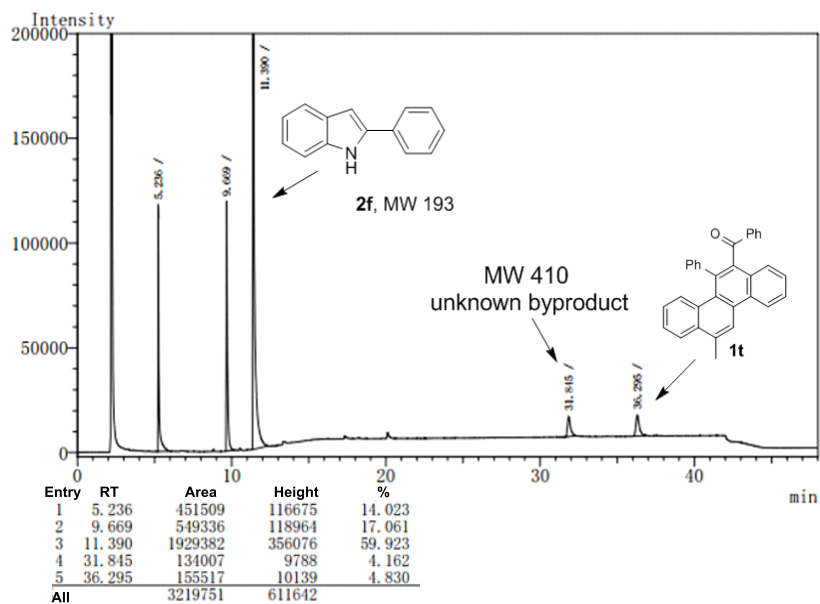

Figure S39. The GC and GC-MS charts of the crude reaction mixture of H

**Scheme S6. The synthesis of 3-phenyl-N-(2-(phenylethynyl)phenyl)naphthalen-1-amine (1e')**

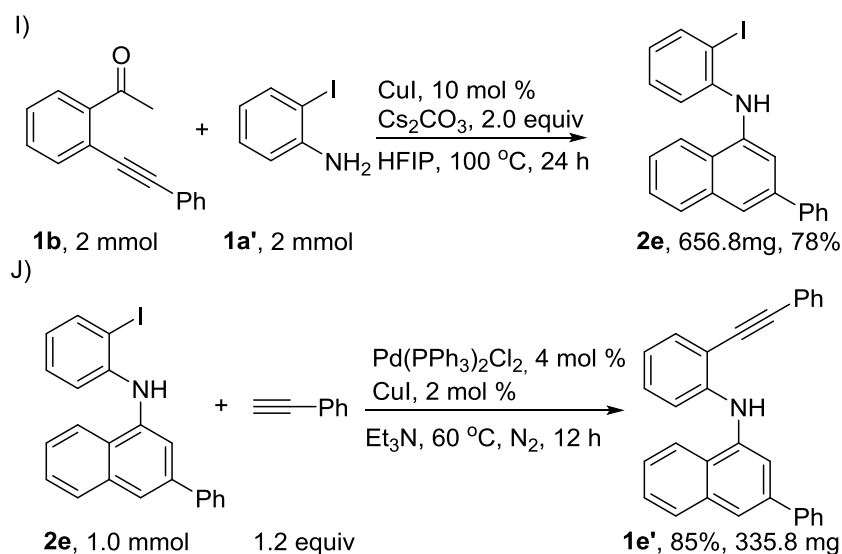

I) A Schlenk tube of 25 mL equipped with a magnetic stir bar was charged with CuI (38 mg, 0.2 mmol, 10 mol %), Cs<sub>2</sub>CO<sub>3</sub> (1.3 g, 4 mmol, 2.0 equiv) in HFIP (10 mL); then, *o*-Iodoaniline (**1a'**, 2 mmol), and *ortho*-alkynylacetophenone (**1b**, 2 mmol) were added. The reaction mixture was stirred (800 r/min in IKA RCT basic) at 100 °C for 24 h under N<sub>2</sub>. After completion of the reaction, the reaction mixture was cooled to room temperature. The crude product was purified by flash column chromatography on silica gel to give the desired N-(2-iodophenyl)-3-phenyl-naphthalen-1-amine in 78% yield (**2e**, 656.8 mg). Light yellow solid; mp 114–117 °C; <sup>1</sup>H NMR (400 MHz, CDCl<sub>3</sub>) δ 8.03 (d, *J* = 7.4 Hz, 1H), 7.96 (d, *J* = 7.9 Hz, 1H), 7.90 (s, 1H), 7.86–7.78 (m, 1H), 7.75–7.65 (m, 3H), 7.62–7.42 (m, 4H), 7.42–7.35 (m, 1H), 7.15 (t, *J* = 7.6 Hz, 1H), 6.92 (d, *J* = 8.2 Hz, 1H), 6.68–6.52 (m, 1H), 6.33 (s, 1H). <sup>13</sup>C NMR (101 MHz, CDCl<sub>3</sub>) δ 145.3, 140.6, 139.3, 138.8, 138.1, 135.0, 129.1, 128.8, 128.8, 127.9, 127.5, 127.3, 126.7, 126.1, 122.4, 122.1, 121.2, 118.7, 115.4, 87.4. HRMS (EI) *m/z*: [M]<sup>+</sup> calcd for C<sub>30</sub>H<sub>20</sub>FN 421.0327; found 421.0325.

J) To a 25 mL Schlenk tube charged with N-(2-iodophenyl)-3-phenyl-naphthalen-1-amin (**2e**, 1.0 mmol, 1.0 equiv), Pd(PPh<sub>3</sub>)<sub>2</sub>Cl<sub>2</sub> (0.04 mmol, 2 mol %), and CuI (0.08 mmol, 4 mol %) in degassed Et<sub>3</sub>N (8 mL) was added aryl alkynes (1.2 mmol, 1.2 equiv), and the resulting solution was stirred at 60 °C for 12 h. Upon completion, the solvent was removed under reduced pressure, and the residue was extracted with EtOAc (3 x 5 mL). The combined organic layer was dried over Na<sub>2</sub>SO<sub>4</sub> and concentrated. The residue was purified by a silica gel flash chromatography (petroleum ether/dichloromethane = 10/1) to afford a white powder in 85% yield (335.8 mg).

## 4.2 Deuterium Labeling Experiments

Scheme S7. The deuterium labeling experiments (Eq. K and Eq. L)

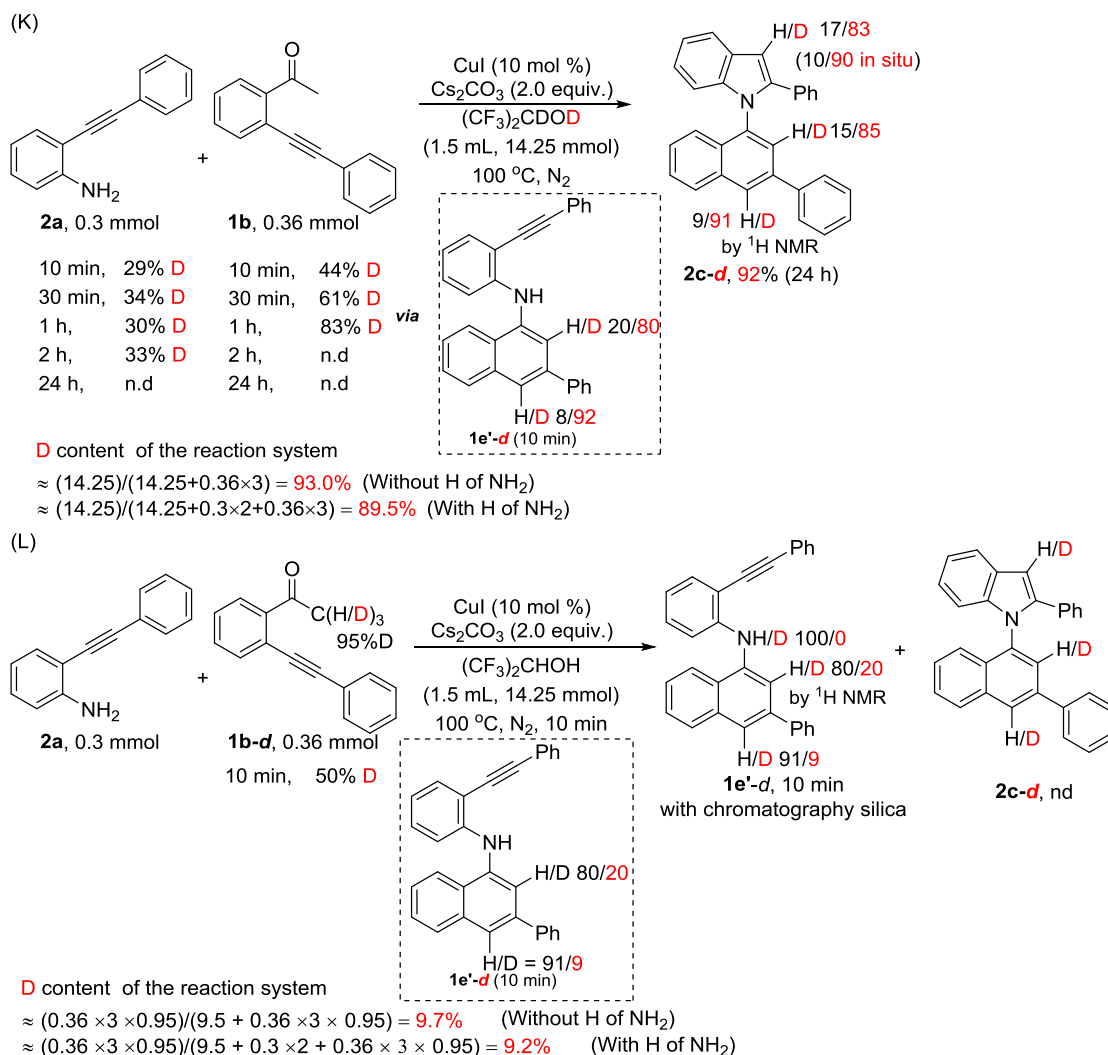

**Note:** Deuterium content of the “reaction system: deuterium content of the total H and D that could be exchanged.

**2a** and **1b** cannot be detected at 4 h by GC and <sup>1</sup>H NMR.

K) A Schlenk tube of 25 mL equipped with a magnetic stir bar was charged with CuI (5.7 mg, 0.03 mmol, 10 mol %), Cs<sub>2</sub>CO<sub>3</sub> (195 mg, 0.6 mmol, 2.0 equiv.) in HFIP-*d*<sub>2</sub> (1.5 mL, 14.25 mmol, >98% D), then, 2-(phenylethynyl)aniline **2a** (57.9 mg, 0.3 mmol), and 2'-phenylethynylacetophenone **1b** (79.2 mg, 0.36 mmol, 1.2 equiv.) were added. The reaction mixture was stirred (800 r/min in IKA RCT basic) at 100 °C under N<sub>2</sub>, and was extracted 100 ul for monitoring by <sup>1</sup>H NMR at 10 min, 30 min, 1 h, 2 h, and 24 h, respectively. In addition, the reaction mixture of 10 min and 24 h were extracted additional 200 ul for isolating the deuteration intermediate **1e'**-**d** and desired deuteration product **2c-d** with flash column chromatography on silica gel.

The parallel experiment was conducted with 24 h, after completion of the reaction, the reaction mixture was cooled to room temperature, the crude product was purified by flash column chromatography on silica gel to give the desired **2c-d** in 92% yield (109.0 mg).

L) A Schlenk tube of 25 mL equipped with a magnetic stir bar was charged with CuI (5.7 mg, 0.03 mmol, 10 mol %), Cs<sub>2</sub>CO<sub>3</sub> (195 mg, 0.6 mmol, 2.0 equiv.) in HFIP (1.5 mL, 14.25 mmol.), then, 2-(phenylethynyl)aniline **2a** (57.9 mg, 0.3 mmol), and 2'-phenylethynylacetophenone **1b-d** (79.2 mg, 0.36 mmol, 1.2 equiv., 95% D) were added. The reaction mixture was stirred (800 r/min in IKA RCT basic) at 100 °C under N<sub>2</sub>, and was extracted 100 ul for monitoring by <sup>1</sup>H NMR at 10 min. In addition, the reaction mixture of 10 min was extracted additional 200 ul for isolating the deuteration intermediate **1e'-d** with flash column chromatography on silica gel.



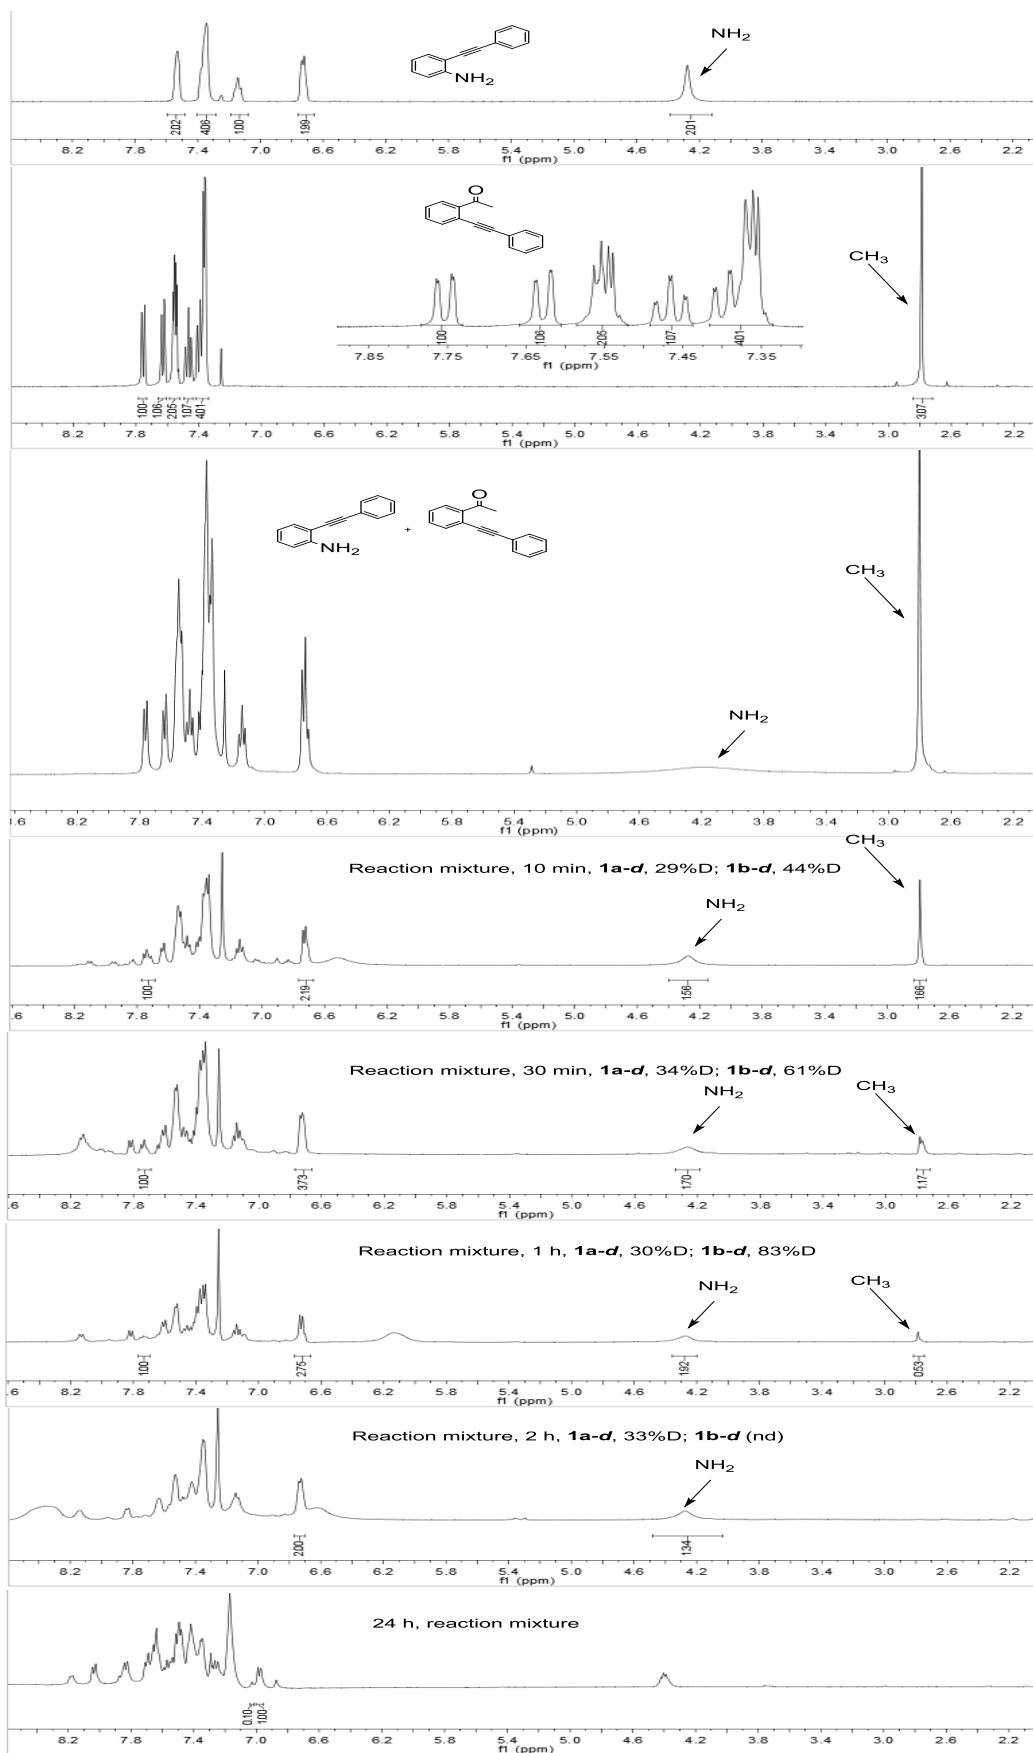

Figure S40.  $^1\text{H}$  NMR Spectrum of Eq. (K) at 10 min, 30 min, 1 h, 2 h, and 24 h.

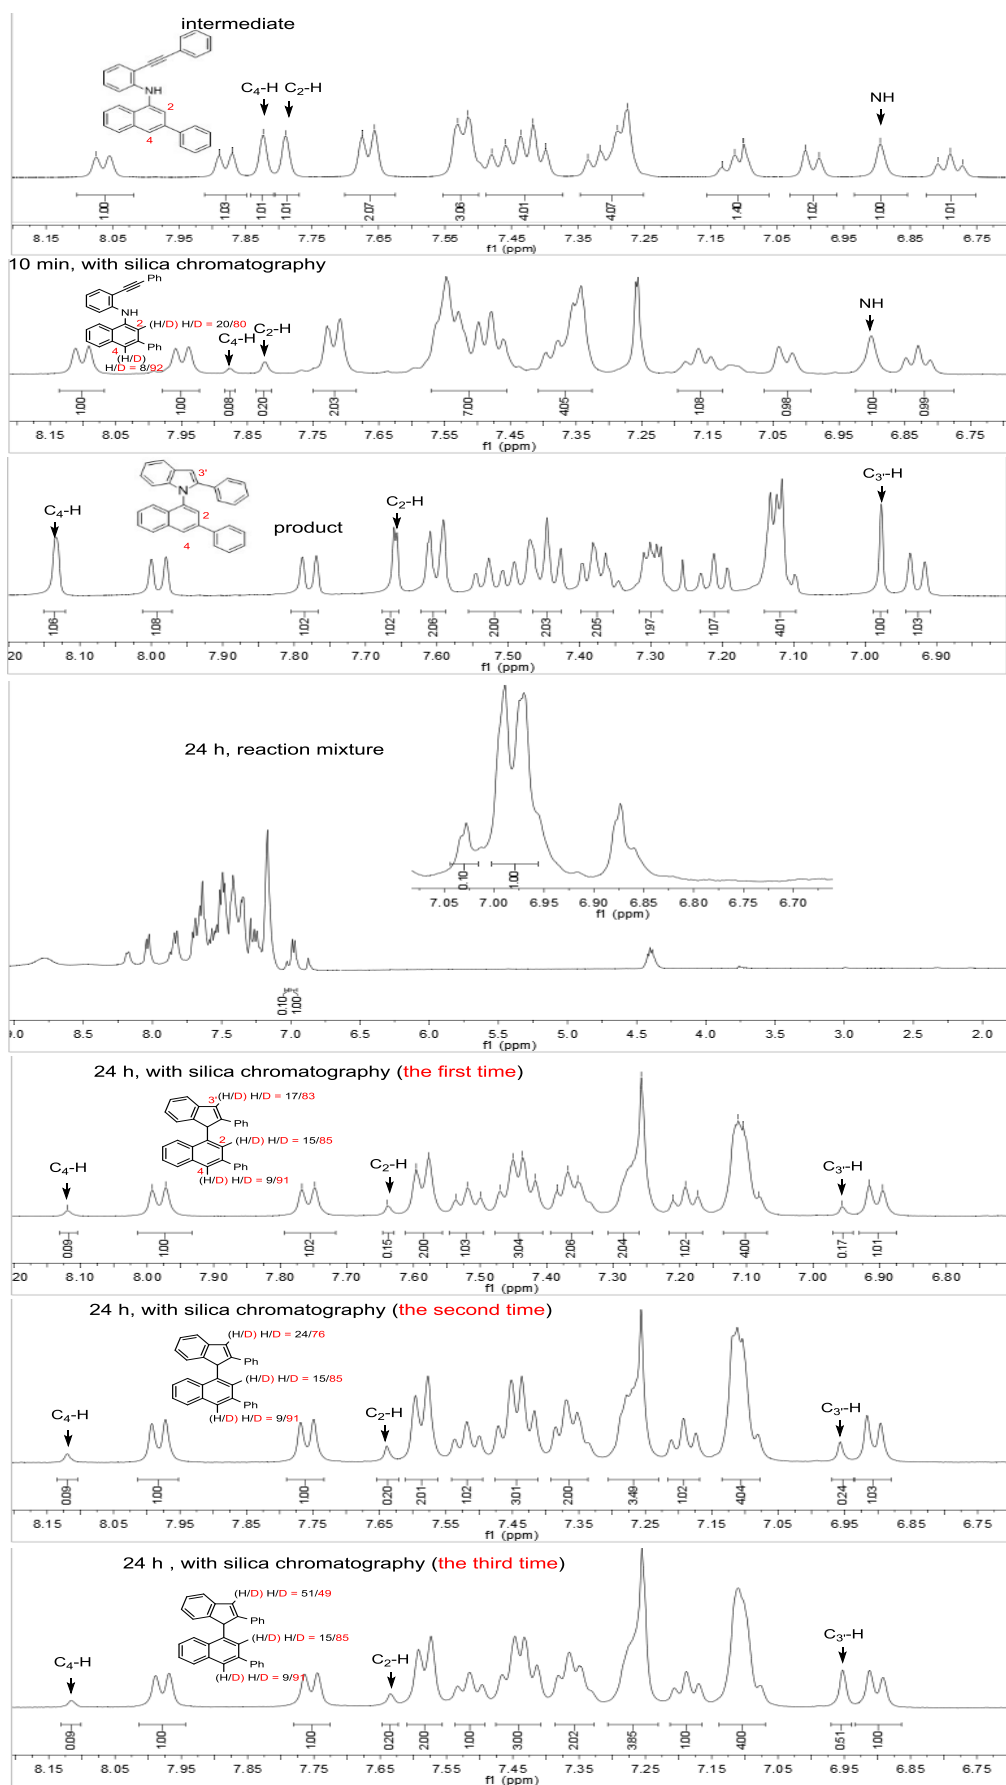

**Figure S41.** The  $^1H$  NMR spectrum of Eq. (K) with silica chromatography at 10 min and 24 h.

**3-Phenyl-N-(2-(phenylethynyl)phenyl)naphthalen-1-amine (1e'-d, Eq. K, 10 min, with silica**

**chromatography)**

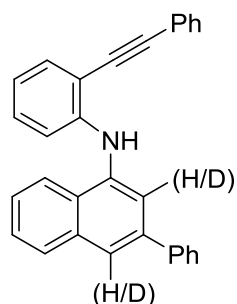

$^1\text{H NMR}$  (400 MHz,  $\text{CDCl}_3$ )  $\delta$  8.10 (d,  $J = 8.0$  Hz, 1H), 7.95 (d,  $J = 8.0$  Hz, 1H), **7.88 (s, 0.08H)**, **7.82 (s, 0.20H)**, 7.72 (d,  $J = 8.0$  Hz, 2H), 7.58–7.43 (m, 7H), 7.41–7.32 (m, 4H), 7.16 (t,  $J = 7.7$  Hz, 1H), 7.03 (d,  $J = 8.2$  Hz, 1H), 6.90 (s, 1H), 6.83 (t,  $J = 7.4$  Hz, 1H).

$^1\text{H NMR}$  Spectrum of **1e'-d** (Eq. K, 10 min, with silica chromatography)

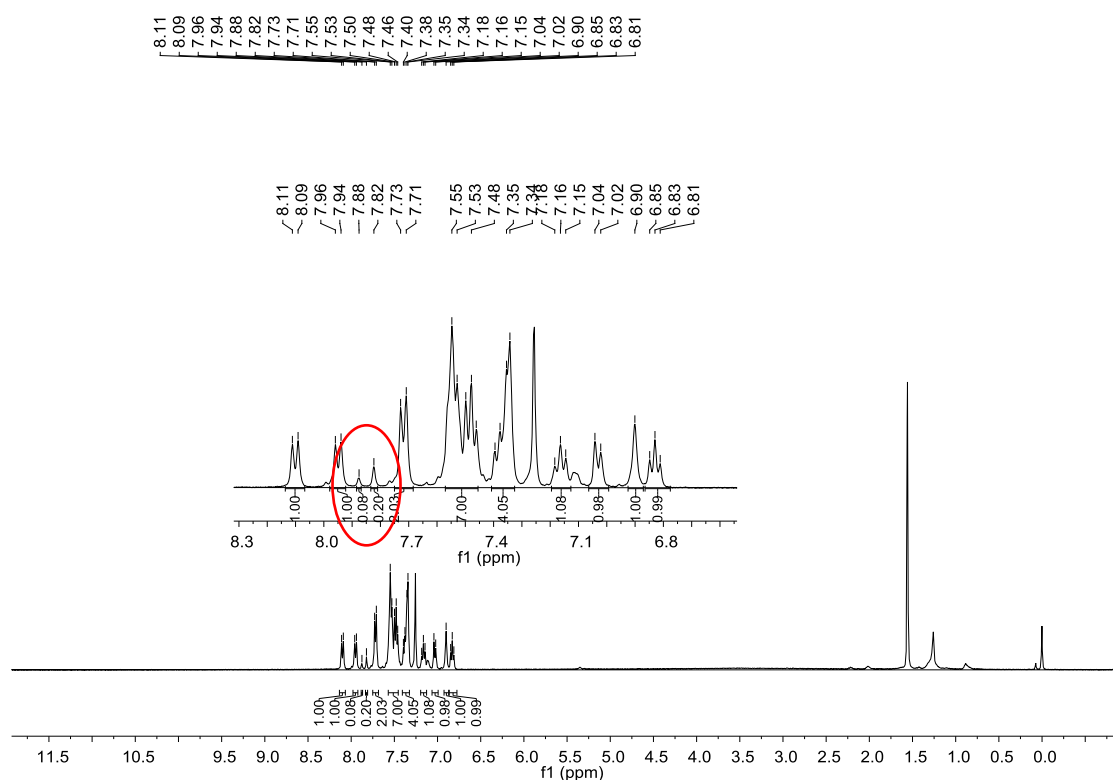

**2-phenyl-1-(3-phenylnaphthalen-1-yl)-1H-indole (2c-d, Eq. K, 24 h, with silica chromatography first time)**

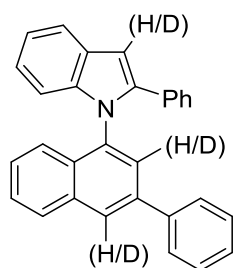

$^1\text{H NMR}$  (400 MHz,  $\text{CDCl}_3$ )  $\delta$  **8.12 (s, 0.09H)**, 7.98 (d,  $J = 8.1$  Hz, 1H), 7.76 (d,  $J = 7.7$  Hz, 1H), **7.64 (s, 0.15H)**, 7.58 (d,  $J = 7.6$  Hz, 2H), 7.52 (t,  $J = 7.4$  Hz, 1H), 7.44 (dd,  $J = 13.3, 7.7$  Hz, 3H), 7.39–7.33 (m, 2H), 7.26 (s, 2H), 7.19 (t,  $J = 7.4$  Hz, 1H), 7.15–7.07 (m, 4H), **6.95 (s, 0.17H)**, 6.90 (d,  $J = 8.0$  Hz, 1H).

<sup>1</sup>H NMR Spectrum of **2c-d** (Eq. K, 24 h, with silica chromatography first time)

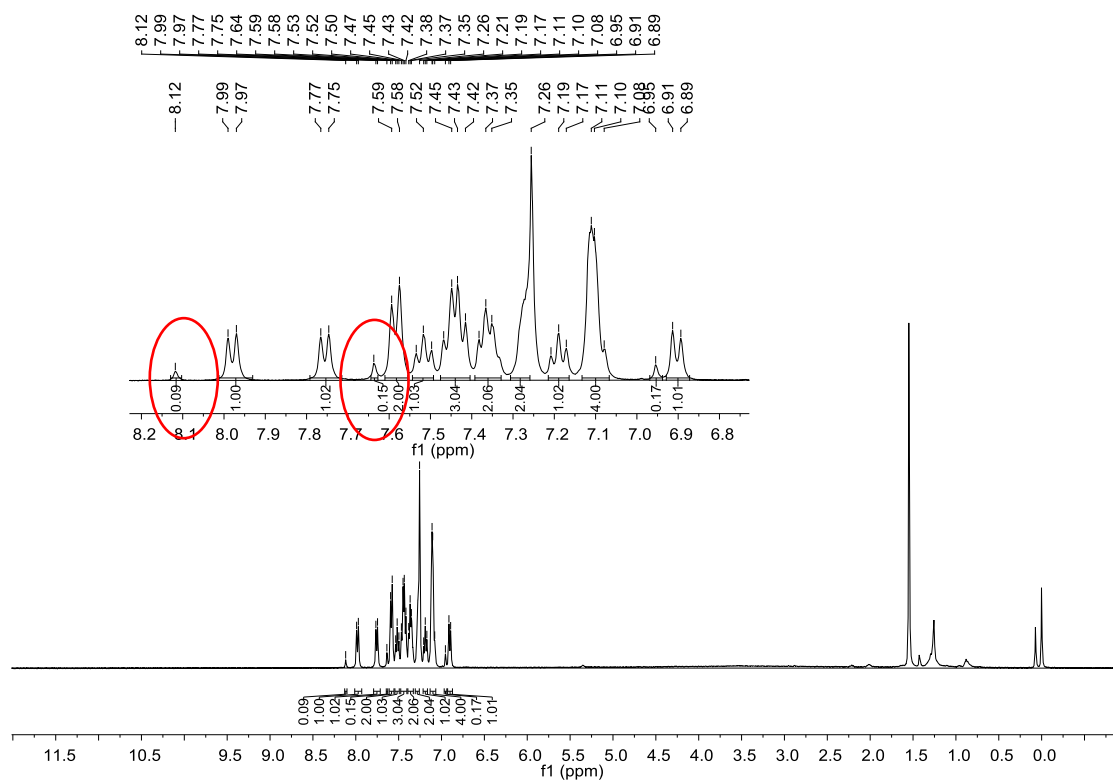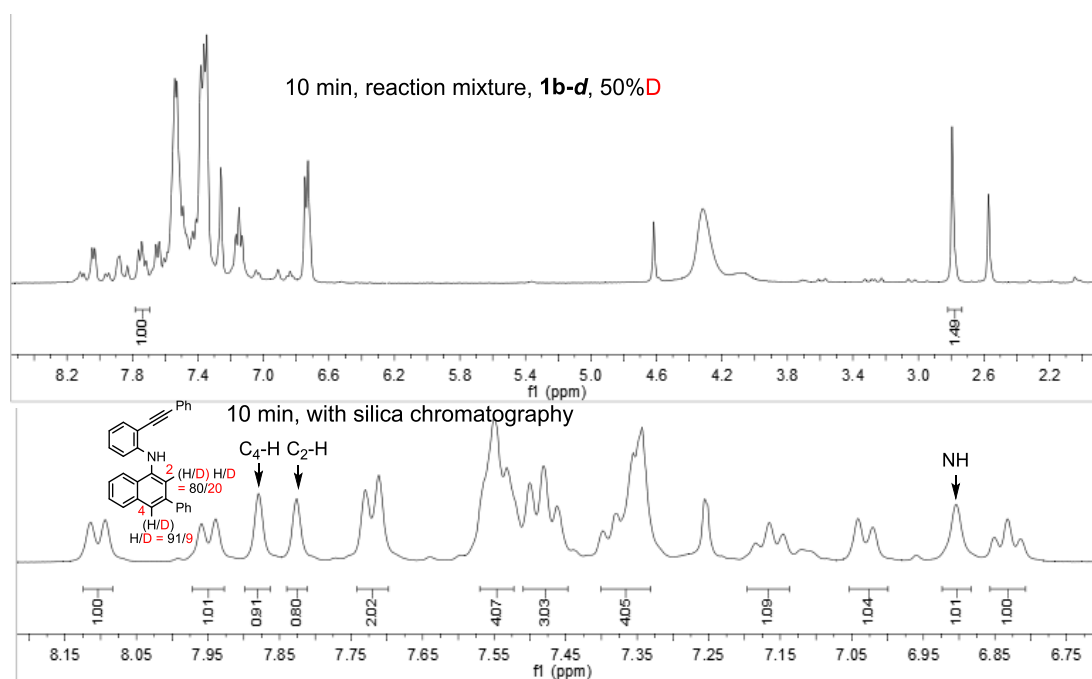

**Figure S42.** The <sup>1</sup>H NMR spectrum of reaction mixture and with silica chromatography of Eq. (L) at 10 min.

**3-Phenyl-N-(2-(phenylethynyl)phenyl)naphthalen-1-amine (1e'-d, Eq. L, 10 min, with silica chromatography)**

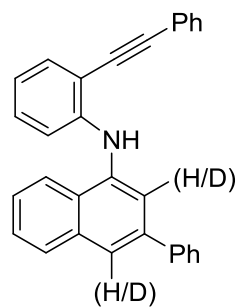

$^1\text{H NMR}$  (400 MHz,  $\text{CDCl}_3$ )  $\delta$  8.11 (d,  $J = 8.2$  Hz, 1H), 7.95 (d,  $J = 7.9$  Hz, 1H), **7.88 (s, 0.91H), 7.83 (s, 0.80H)**, 7.73 (d,  $J = 7.4$  Hz, 2H), 7.58–7.53 (m, 4H), 7.52–7.45 (m, 3H), 7.41–7.35 (m, 4H), 7.17 (t,  $J = 7.7$  Hz, 1H), 7.04 (d,  $J = 8.3$  Hz, 1H), 6.91 (s, 1H), 6.84 (t,  $J = 7.4$  Hz, 1H).

$^1\text{H NMR}$  Spectrum of **1e'-d** (Eq. L, 10 min, with silica chromatography)

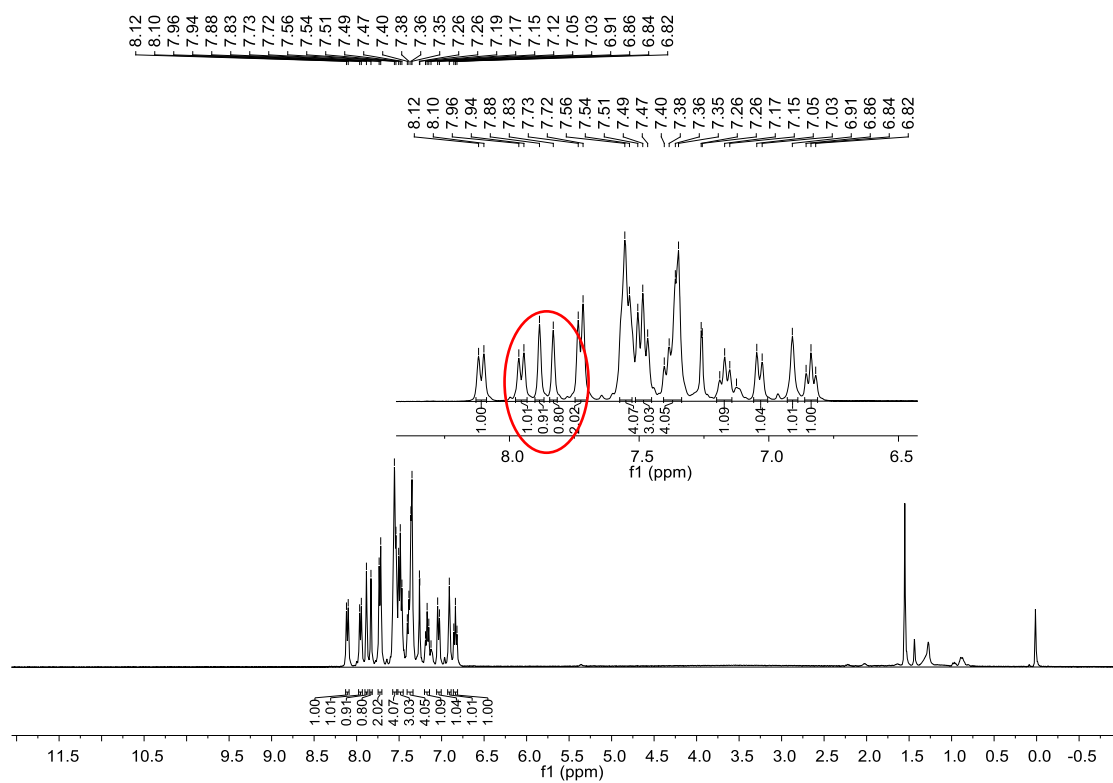

**Scheme S8. Deuterium labeling experiments (Eq. M-Q)**

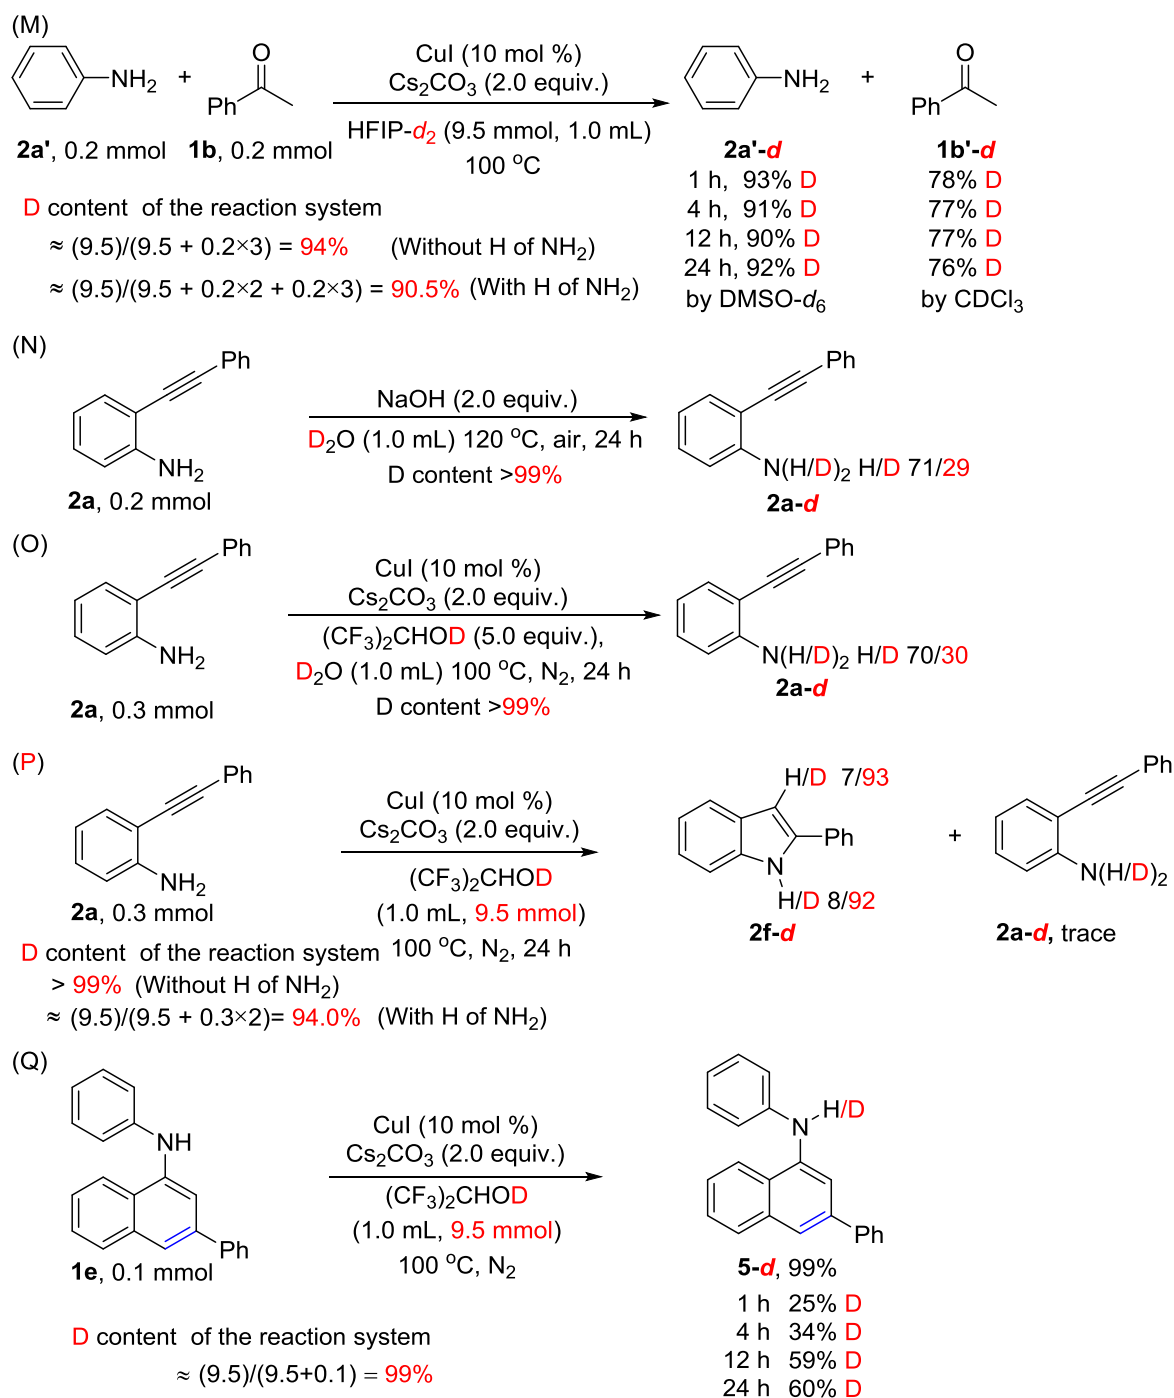

M) A Schlenk tube of 25 mL equipped with a magnetic stir bar was charged with CuI (3.8 mg, 0.02 mmol, 10 mol%), Cs<sub>2</sub>CO<sub>3</sub> (132 mg, 0.4 mmol, 2.0 equiv.) in HFIP-*d*<sub>2</sub> (7.5 mmol), then, anilines **2a'** (0.2 mmol), and acetophenone **1b'** (0.2 mmol) were added. The reaction mixture was stirred (800 r/min in IKA RCT basic) at 100 °C under N<sub>2</sub>, and was extracted 100 ul to monitor by <sup>1</sup>H NMR at 0 h, 1 h, 4 h, 12 h, and 24 h respectively.

We can observed the change about methyl of **1b'-d** in CDCl<sub>3</sub>, but the NH<sub>2</sub> of **2a'-d** cannot be identified, as supplementary, <sup>1</sup>H NMR in DMSO-*d*<sub>6</sub> gave the change of NH<sub>2</sub> of **2a'-d**.

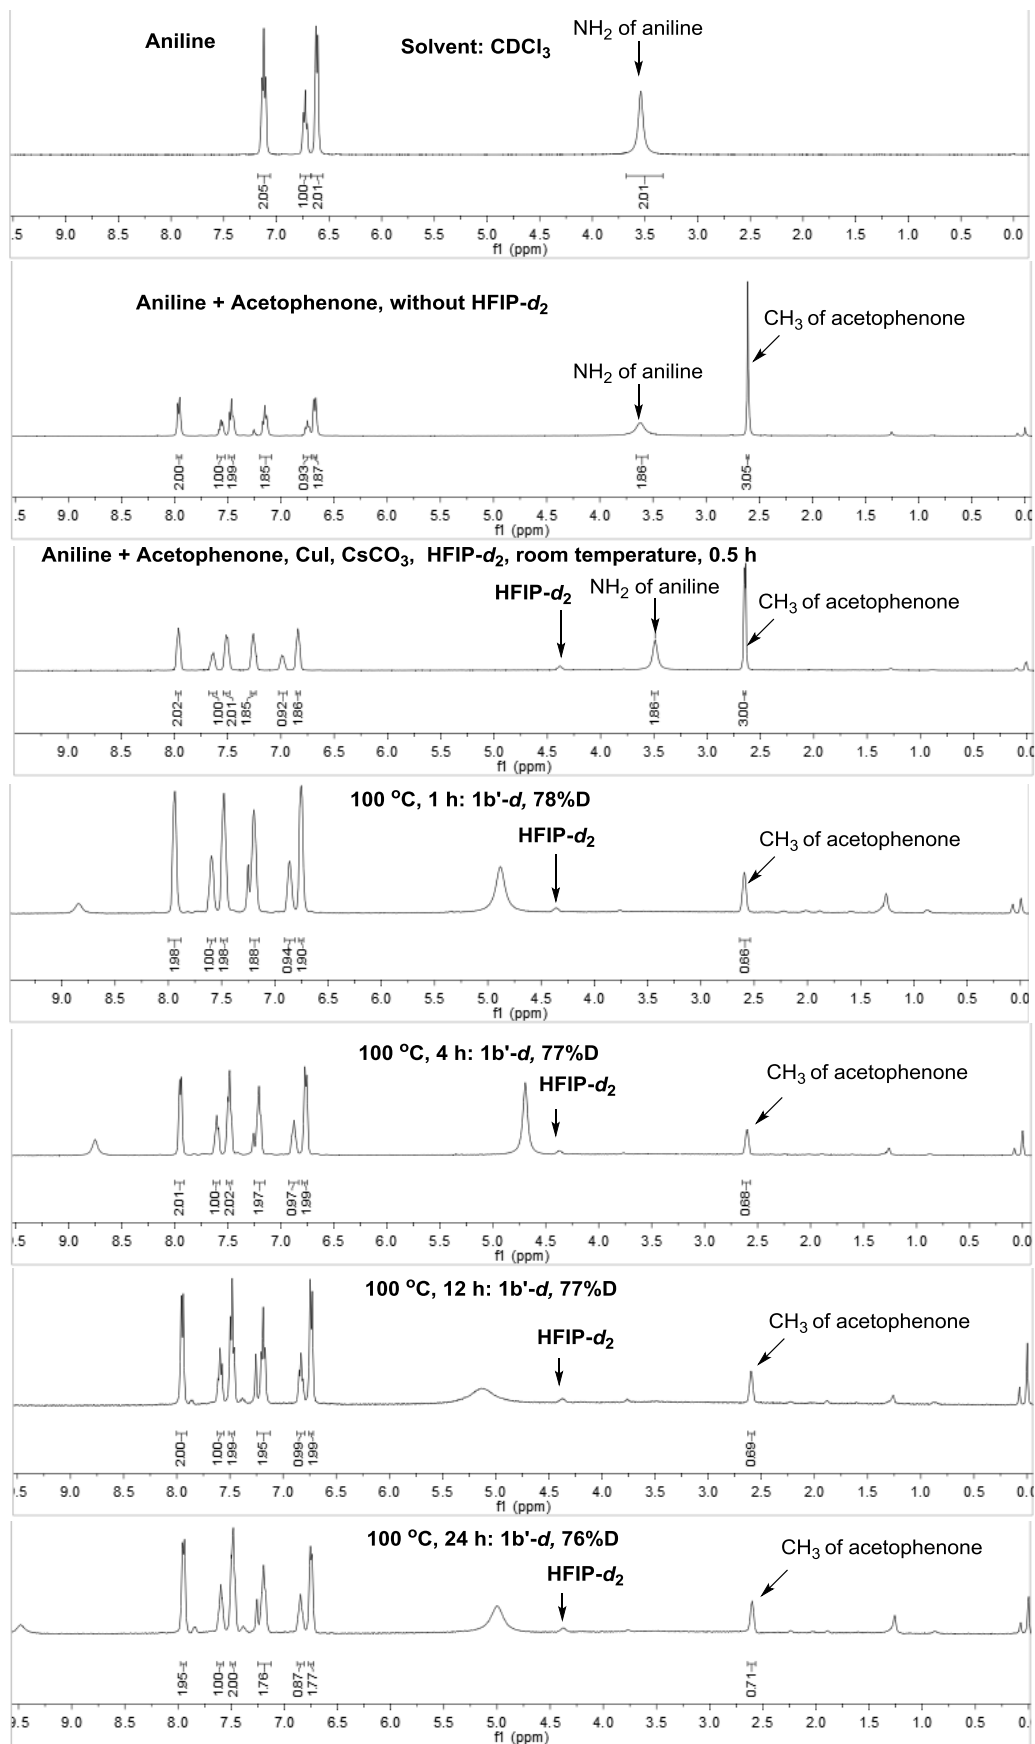

Figure 42. The  $^1\text{H}$ NMR Spectrum of Eq. (M) in  $\text{CDCl}_3$

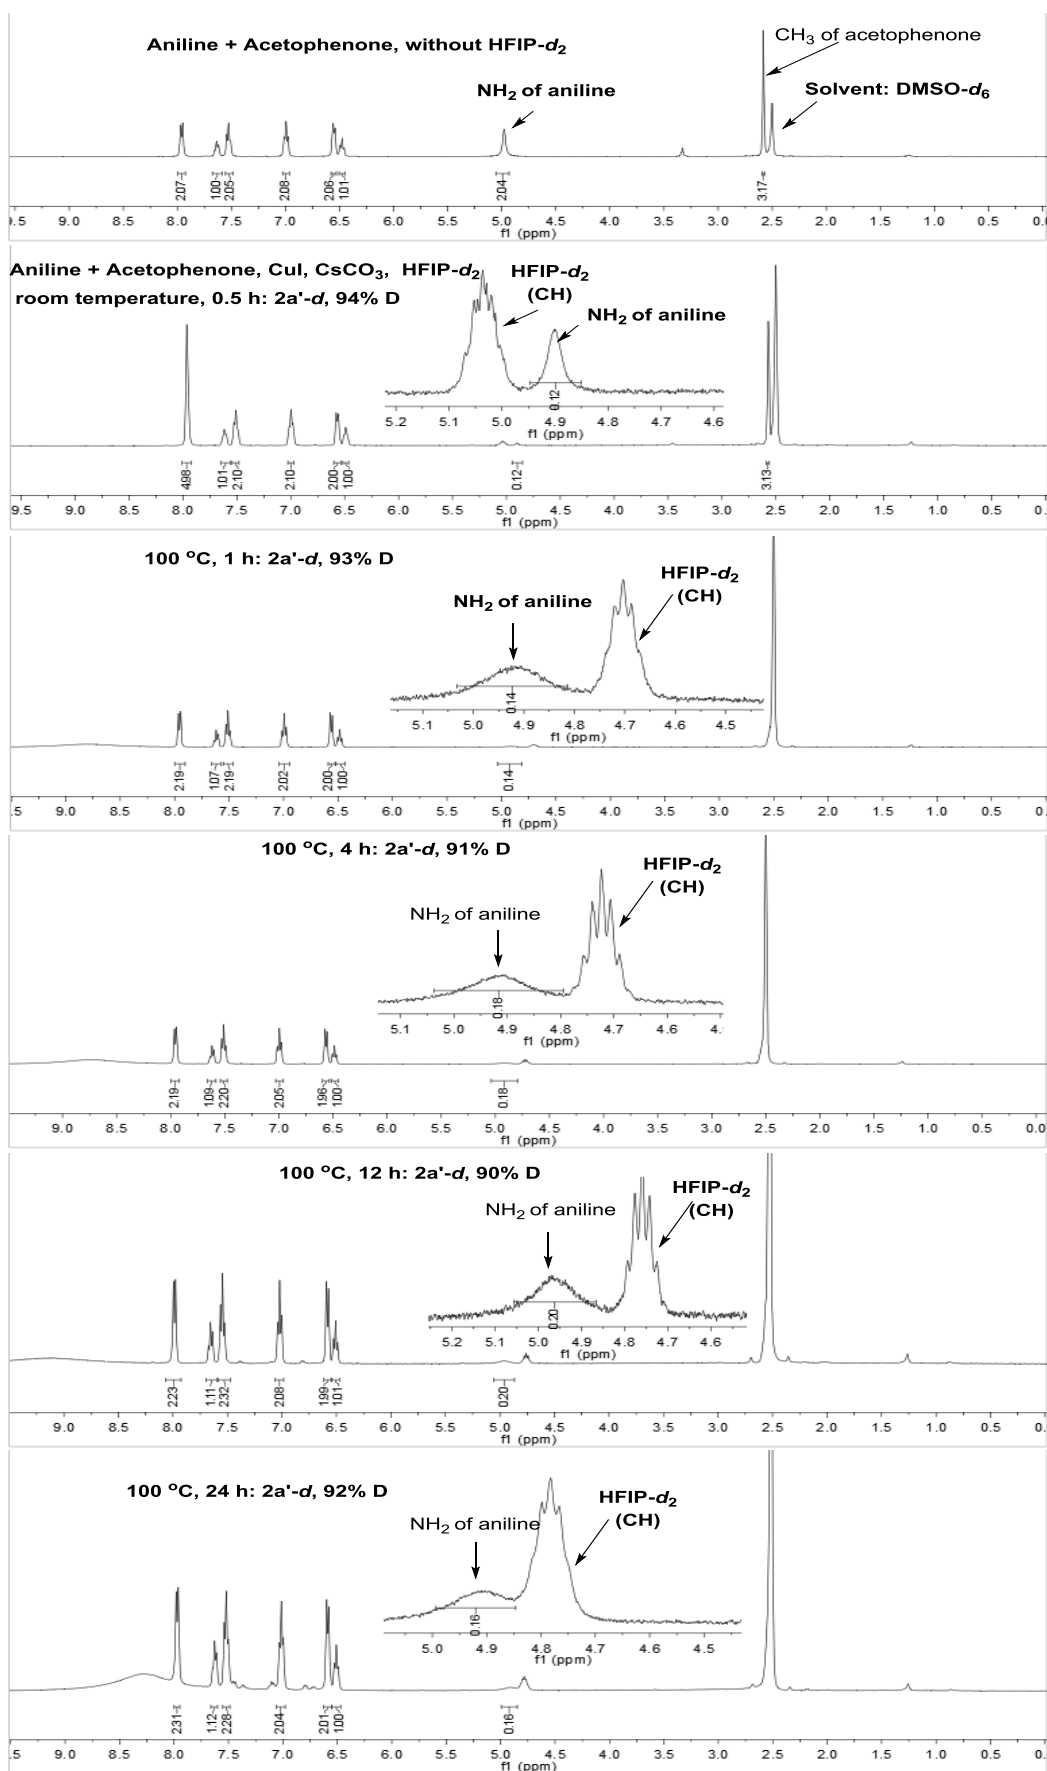

Figure S43. The  $^1\text{H}$ NMR Spectrum of Eq. (M) in DMSO- $d_6$



N) A Schlenk tube of 25 mL equipped with a magnetic stir bar was charged with D<sub>2</sub>O (1.0 mL), then, 2-(phenylethynyl)aniline **2a** (0.2 mmol) and NaOH (2.0 equiv.) were added. The reaction mixture was stirred (800 r/min in IKA RCT basic) at 100 °C under N<sub>2</sub>. After completion of the reaction, the reaction mixture was cooled to room temperature. The crude product was extracted by CDCl<sub>3</sub>, for identifying by <sup>1</sup>H NMR directly without column chromatography.

**2-(phenylethynyl)aniline (2a-d)** (Eq. N)

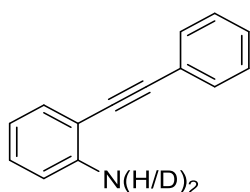

<sup>1</sup>H NMR (400 MHz, CDCl<sub>3</sub>) δ 7.58–7.49 (m, 2H), 7.42–7.30 (m, 4H), 7.15 (t, *J* = 7.6 Hz, 1H), 6.74 (d, *J* = 6.8 Hz, 2H), 4.28 (s, 1.42H).

<sup>1</sup>H NMR Spectrum of **2a-d** (Eq. N, 29% D)

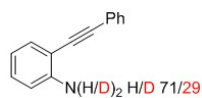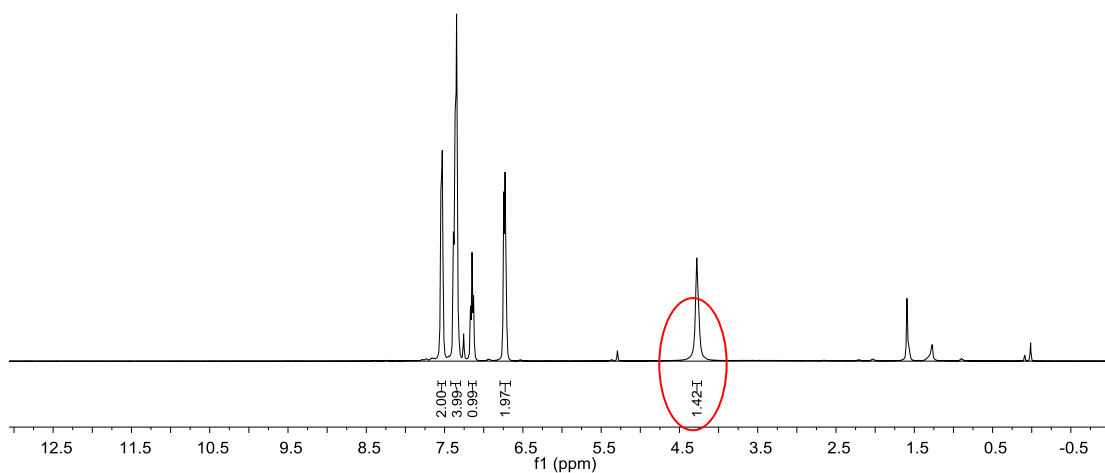

O) A Schlenk tube of 25 mL equipped with a magnetic stir bar was charged with CuI (5.7 mg, 0.03 mmol, 10 mol %), Cs<sub>2</sub>CO<sub>3</sub> (195 mg, 0.6 mmol, 2.0 equiv.), HFIP-OD (1.5 mmol, 5.0 equiv.) in D<sub>2</sub>O (1.0 mL), then, 2-(phenylethynyl)aniline **2a** (0.3 mmol) was added. The reaction mixture was stirred (800 r/min in IKA RCT basic) at 100 °C for 24 h under N<sub>2</sub>. After completion of the reaction, the reaction mixture was cooled to room temperature. The crude product was extracted by CDCl<sub>3</sub>, for identifying by <sup>1</sup>HNMR directly without column chromatography.

**2-(phenylethynyl)aniline (2a-d)** (Eq. O)

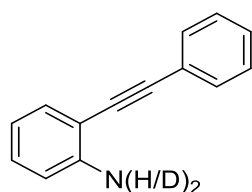

<sup>1</sup>H NMR (400 MHz, CDCl<sub>3</sub>) δ 7.58–7.50 (m, 2H), 7.41–7.31 (m, 4H), 7.15 (t, *J* = 7.7 Hz, 1H), 6.77–6.69 (m, 2H), 4.28 (s, **1.40H**).

<sup>1</sup>H NMR Spectrum of **2a-d** (Eq. O, 30% D)

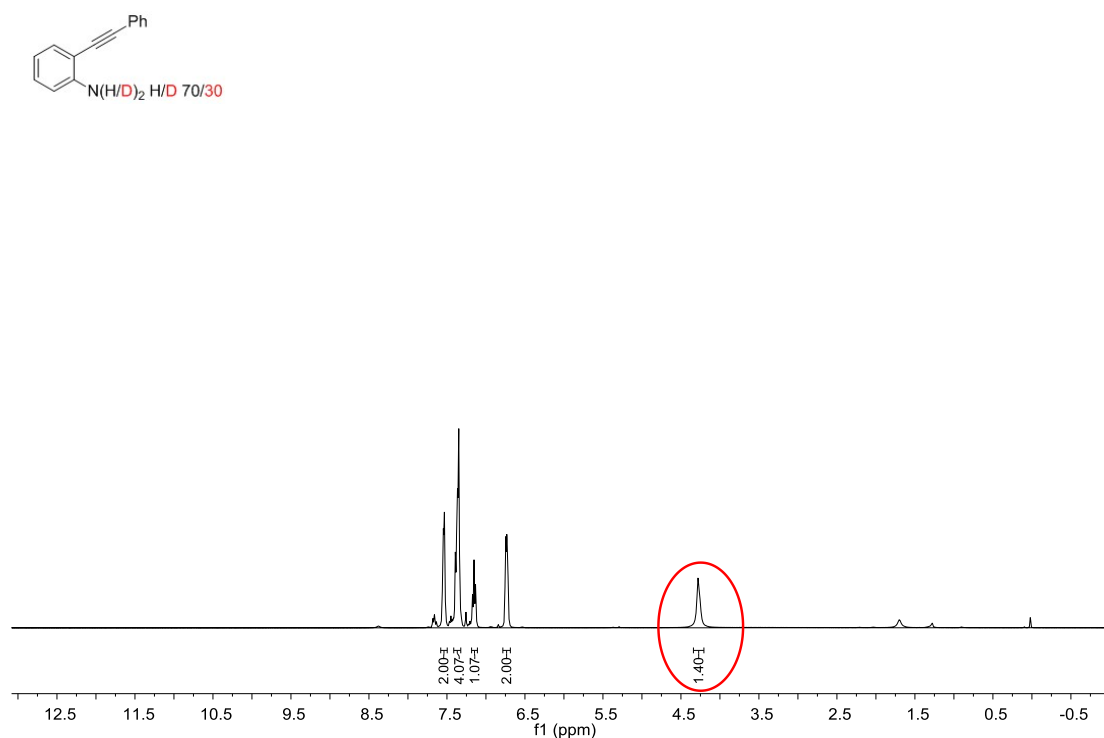

P) A Schlenk tube of 25 mL equipped with a magnetic stir bar was charged with CuI (5.7 mg, 0.03 mmol, 10 mol %), Cs<sub>2</sub>CO<sub>3</sub> (195 mg, 0.6 mmol, 2.0 equiv.) in HFIP-OD (1.0 mL, 9.5 mmol), then, 2-(phenylethynyl)aniline **2a** (0.3 mmol) was added. The reaction mixture was stirred (800 r/min in IKA RCT basic) at 100 °C for 24 h under N<sub>2</sub>. After completion of the reaction, the reaction mixture was cooled to room temperature, the solvent was removed under reduced pressure, and the residue was extracted with CDCl<sub>3</sub>, for identifying by <sup>1</sup>HNMR directly without column chromatography.

### 2-phenyl-1H-indole (**2f-d**) (Eq. P)

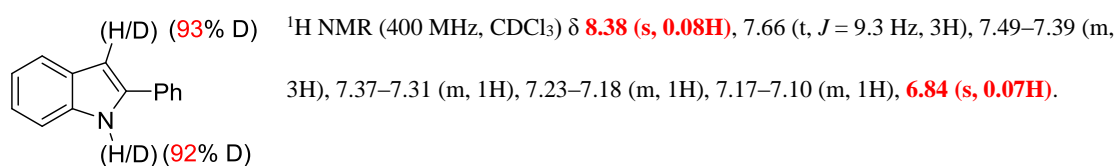

### <sup>1</sup>H NMR Spectrum of **2f-d** (Eq. P)

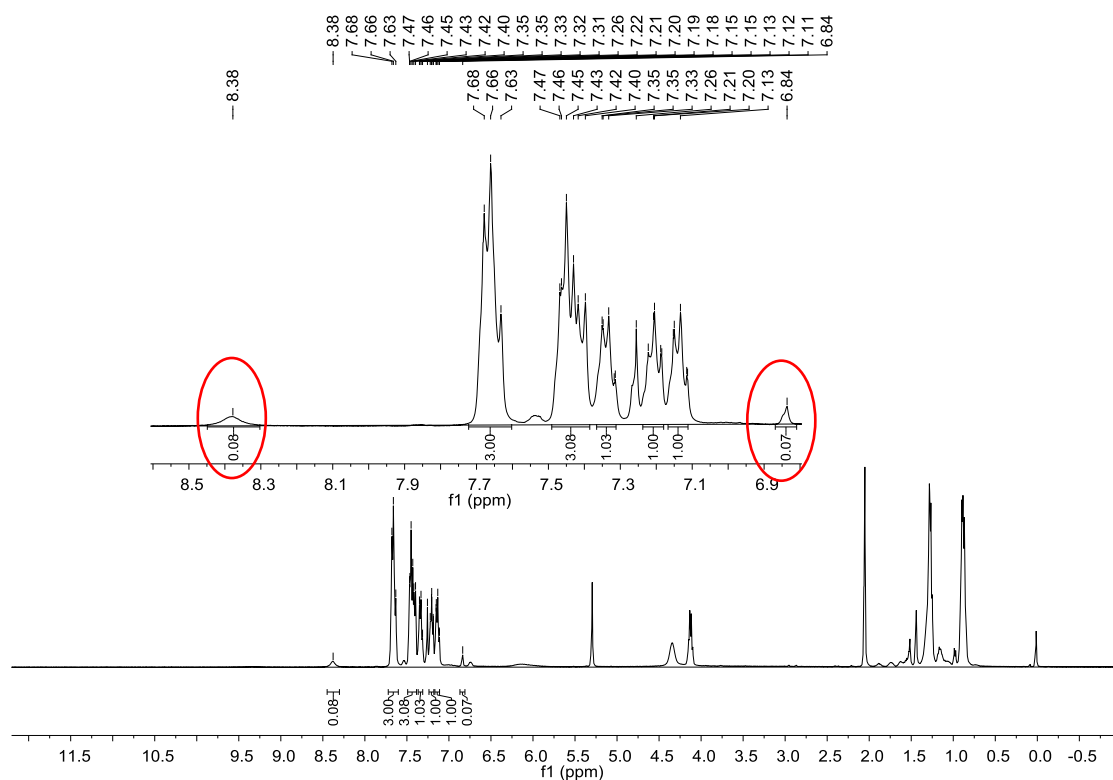

Q) A Schlenk tube of 25 mL equipped with a magnetic stir bar was charged with CuI (1.9 mg, 0.01 mmol, 10 mol %), Cs<sub>2</sub>CO<sub>3</sub> (66 mg, 0.2 mmol, 2.0 equiv.) in HFIP-OD (1.0 mL, 9.5 mmol), then, **1e** (0.1 mmol) was added. The reaction mixture was stirred (800 r/min in IKA RCT basic) at 100 °C under N<sub>2</sub>, the reaction mixture was extracted 100 ul to monitor by <sup>1</sup>H NMR at 1 h, 4 h, 12 h, and 24 h respectively, the solvent was removed under reduced pressure, and the residue was extracted with CDCl<sub>3</sub>, for identifying by <sup>1</sup>H NMR directly without column chromatography.

**N,3-diphenylnaphthalen-1-amine (5-d, 1 h, Eq. Q)**

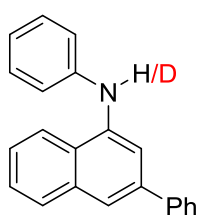

<sup>1</sup>H NMR (400 MHz, CDCl<sub>3</sub>) δ 8.02 (d, *J* = 8.2 Hz, 1H), 7.92 (d, *J* = 8.1 Hz, 1H), 7.77 (s, 1H), 7.67 (d, *J* = 7.6 Hz, 3H), 7.56–7.40 (m, 4H), 7.38–7.32 (m, 1H), 7.29 (d, *J* = 7.5 Hz, 2H), 7.07 (d, *J* = 7.8 Hz, 2H), 6.93 (t, *J* = 6.7 Hz, 1H), **6.02 (s, 0.75H)**.

**N,3-diphenylnaphthalen-1-amine (5-d, 4 h, Eq. Q)**

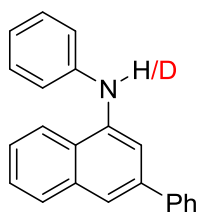

<sup>1</sup>H NMR (400 MHz, CDCl<sub>3</sub>) δ 8.03 (d, *J* = 8.2 Hz, 1H), 7.93 (d, *J* = 7.9 Hz, 1H), 7.78 (s, 1H), 7.69 (d, *J* = 7.7 Hz, 3H), 7.57–7.43 (m, 4H), 7.37 (t, *J* = 7.1 Hz, 1H), 7.30 (t, *J* = 7.5 Hz, 2H), 7.08 (d, *J* = 7.9 Hz, 2H), 6.95 (t, *J* = 7.1 Hz, 1H), **6.02 (s, 0.66H)**.

**N,3-diphenylnaphthalen-1-amine (5-d, 12 h, Eq. Q)**

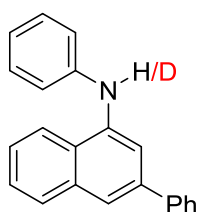

<sup>1</sup>H NMR (400 MHz, CDCl<sub>3</sub>) δ 7.99 (d, *J* = 7.5 Hz, 1H), 7.89 (d, *J* = 7.1 Hz, 1H), 7.74 (s, 1H), 7.64 (s, 3H), 7.53–7.39 (m, 4H), 7.33 (s, 1H), 7.30–7.18 (m, 4H), 7.04 (d, *J* = 7.2 Hz, 2H), 6.91 (s, 1H), **5.98 (s, 0.41H)**.

**N,3-diphenylnaphthalen-1-amine (5-d, 24 h, Eq. Q)**

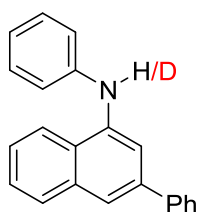

<sup>1</sup>H NMR (400 MHz, CDCl<sub>3</sub>) δ 8.03 (d, *J* = 8.1 Hz, 1H), 7.92 (d, *J* = 7.8 Hz, 1H), 7.78 (s, 1H), 7.68 (d, *J* = 7.5 Hz, 3H), 7.56–7.42 (m, 4H), 7.37 (t, *J* = 7.1 Hz, 1H), 7.28 (dd, *J* = 14.0, 6.6 Hz, 2H), 7.07 (d, *J* = 7.6 Hz, 2H), 6.95 (t, *J* = 7.1 Hz, 1H), **6.00 (s, 0.40H)**.

<sup>1</sup>H NMR Spectrum of **5-d** (1 h, Eq. Q)

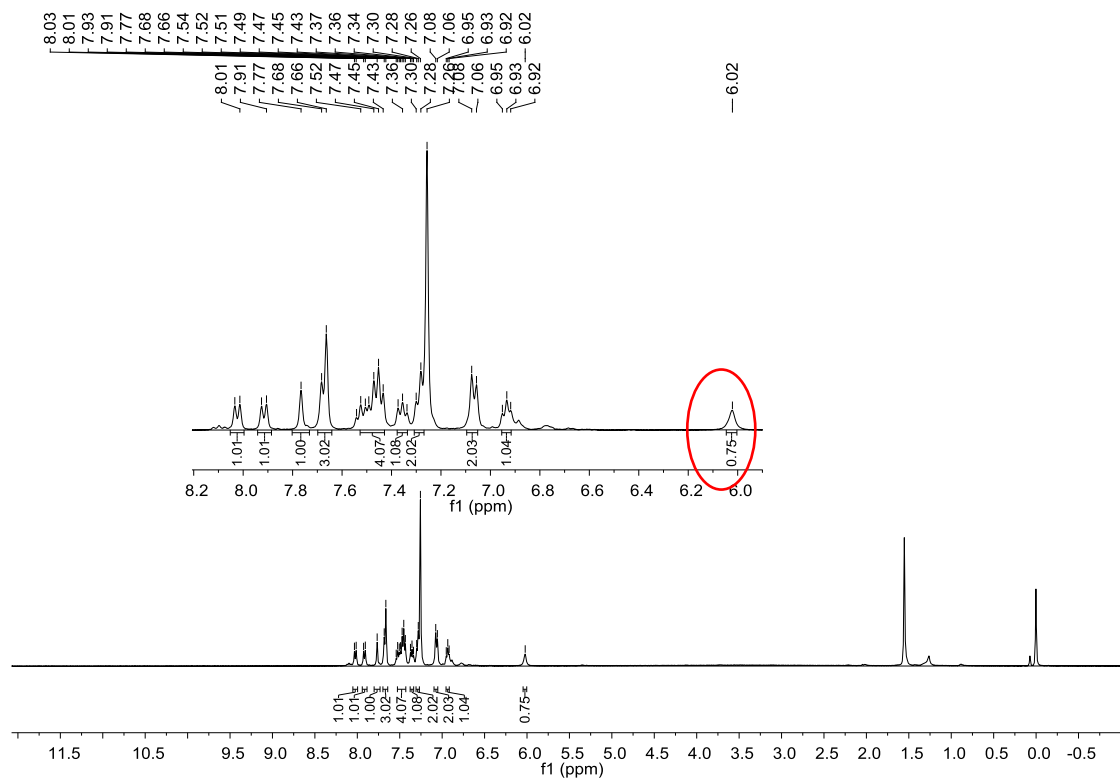

<sup>1</sup>H NMR Spectrum of **5-d** (4 h, Eq. Q)

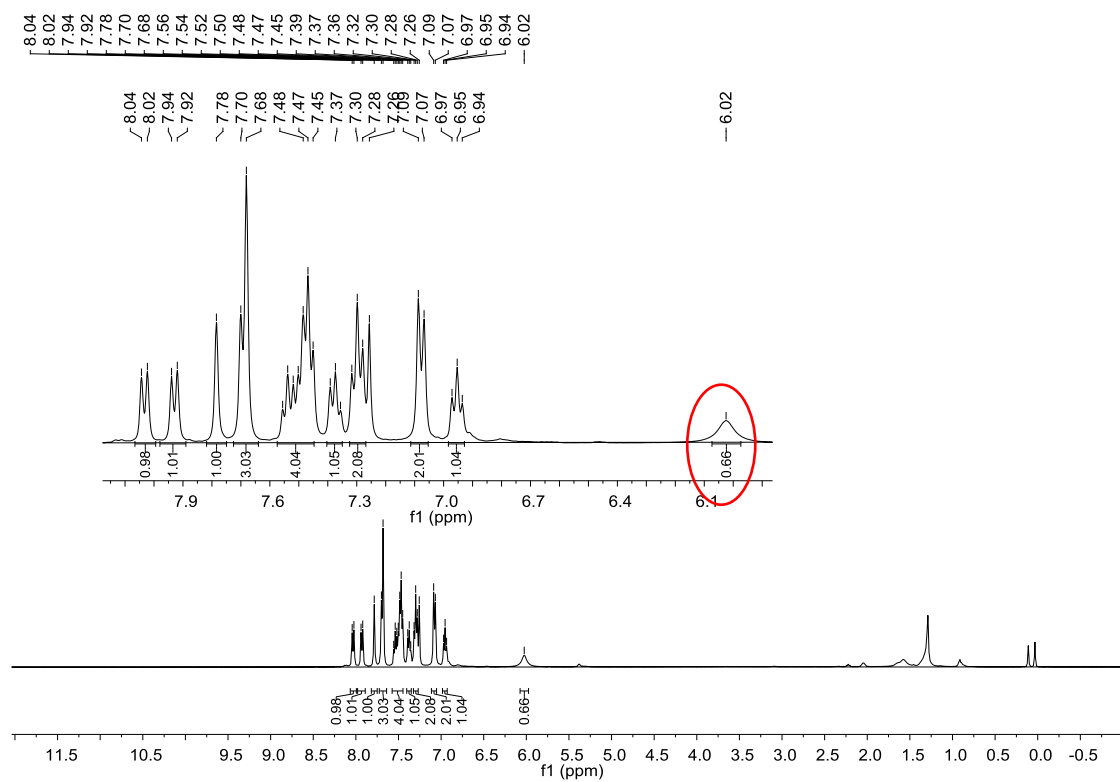

<sup>1</sup>H NMR Spectrum of **5-d** (12 h, Eq. Q)

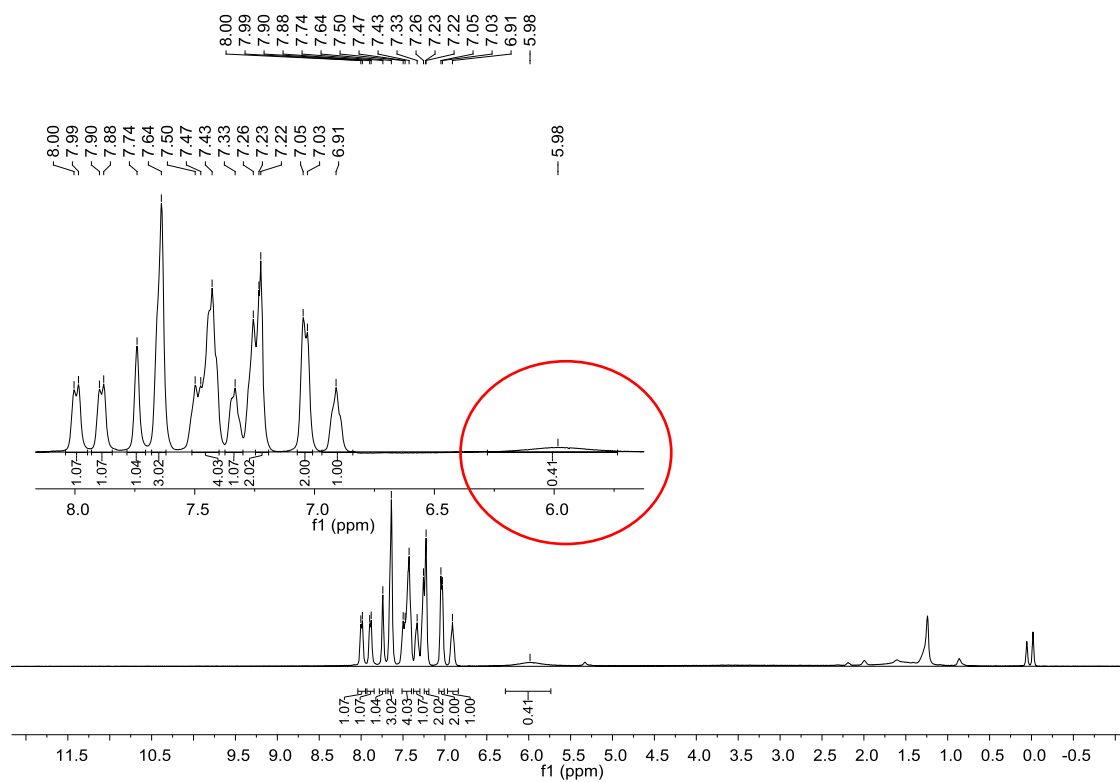

<sup>1</sup>H NMR Spectrum of **5-d** (24 h, Eq. Q)

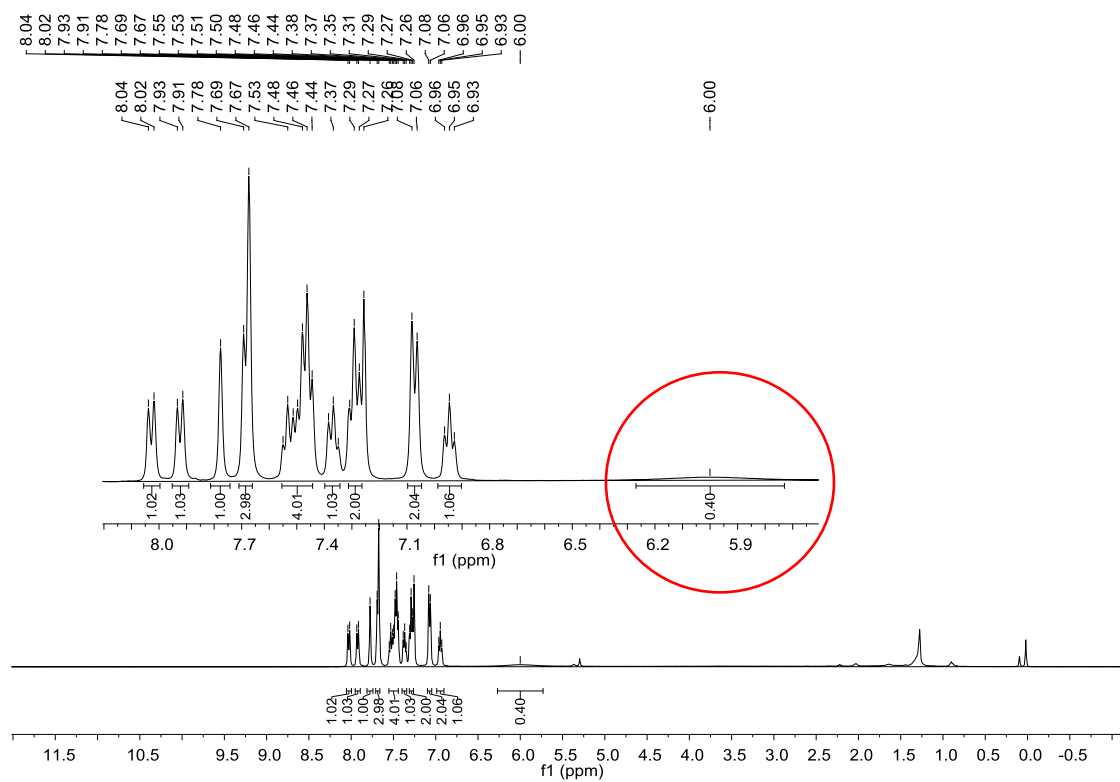

**Scheme S9. Deuterium labeling experiments (Eq. R)**

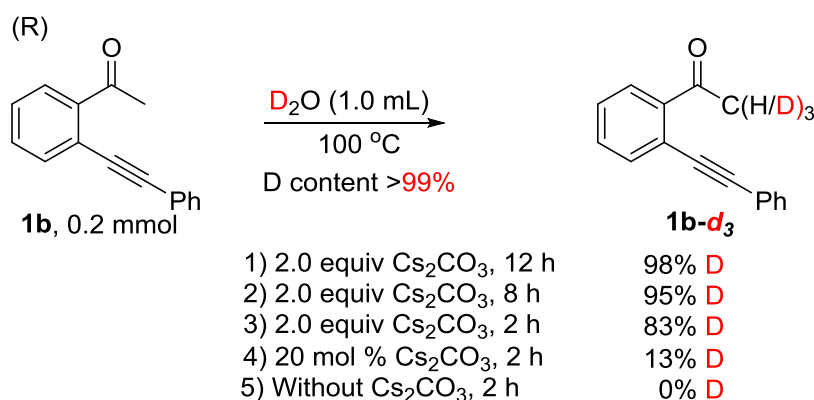

The reactions of **1b** in D<sub>2</sub>O under 2 equiv Cs<sub>2</sub>CO<sub>3</sub>, could give the **1b-d<sub>3</sub>** with 98% deuteration of the methyl group, however, D<sub>2</sub>O did not react with **1b** in absence of Cs<sub>2</sub>CO<sub>3</sub>, which indicated that the base could facilitate the keto-enol tautomerization. The above results illustrated that the reaction proceeded via keto-enol tautomerization, dehydration, and hydrolysis.

R) A Schlenk tube of 25 mL equipped with a magnetic stir bar was charged with D<sub>2</sub>O (1.0 mL); then, 2'-phenylethynylacetophenone **1b** (0.2 mmol) was added. The reaction mixture was stirred (800 r/min in IKA RCT basic) at 100 °C under N<sub>2</sub>. After completion of the reaction, the reaction mixture was cooled to room temperature. The crude product was purified by flash column chromatography on silica gel to give the desired **1b-d<sub>3</sub>**.

**2'-phenylethynylacetophenone (1b-d<sub>3</sub>)**

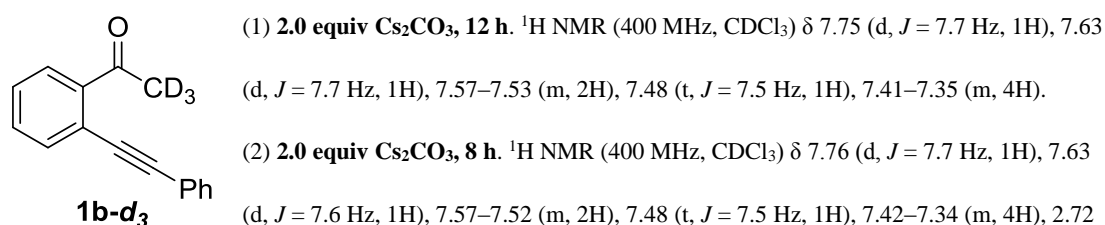

(S, 0.15H).

(3) **2.0 equiv Cs<sub>2</sub>CO<sub>3</sub>, 4 h.** <sup>1</sup>H NMR (400 MHz, CDCl<sub>3</sub>) δ 7.76 (d, *J* = 7.6 Hz, 1H), 7.63 (d, *J* = 7.5 Hz, 1H), 7.57–7.52 (m, 2H), 7.47 (t, *J* = 7.3 Hz, 1H), 7.42–7.34 (m, 4H), 2.81–2.72 (m, 0.5H).

(4) **20 mol % Cs<sub>2</sub>CO<sub>3</sub>, 2 h.** <sup>1</sup>H NMR (400 MHz, CDCl<sub>3</sub>) δ 7.76 (d, *J* = 7.3 Hz, 1H), 7.63 (d, *J* = 7.2 Hz, 1H), 7.57–7.52 (m, 2H), 7.48 (t, *J* = 6.8 Hz, 1H), 7.43–7.33 (m, 4H), 2.80 (s, 2.60H).

(5) **Without Cs<sub>2</sub>CO<sub>3</sub>, 2 h.** <sup>1</sup>H NMR (400 MHz, CDCl<sub>3</sub>) δ 7.75 (d, *J* = 7.3 Hz, 1H), (d, *J* = 7.2 Hz, 1H), 7.57–7.53 (m, 2H), 7.47 (t, *J* = 6.8 Hz, 1H), 7.41–7.35 (m, 4H), 2.79 (s, 3H).

**Scheme S10. The deuterium labeling experiments (Eq. S-V)**

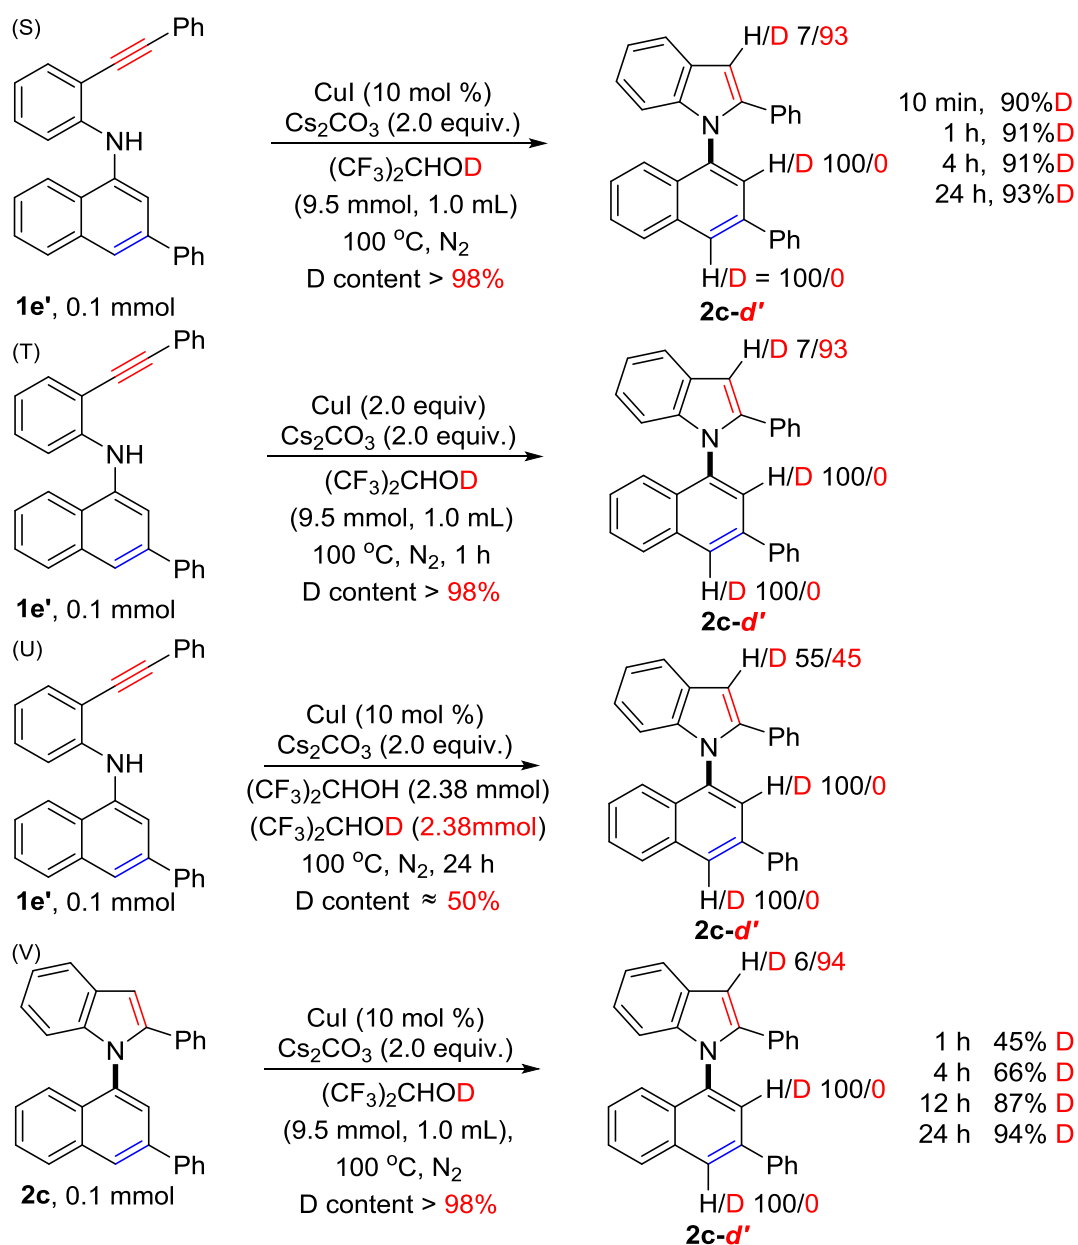

S) A Schlenk tube of 25 mL equipped with a magnetic stir bar was charged with CuI (1.9 mg, 0.01 mmol, 10 mol %), Cs<sub>2</sub>CO<sub>3</sub> (66 mg, 0.2 mmol, 2.0 equiv.) in HFIP-OD (9.5 mmol), then, 3-Phenyl-N-(2-phenylethynyl)phenyl naphthalen-1-amine (**1e'**) (0.1 mmol) was added. The reaction mixture was stirred (800 r/min in IKA RCT basic) at 100 °C, and was extracted 100 ul for monitoring by <sup>1</sup>H NMR at 10 min, 1 h, 4 h, and 24 h respectively, the solvent was removed under reduced pressure, and the residue was extracted with CDCl<sub>3</sub>, for identifying by <sup>1</sup>H NMR directly without column chromatography.



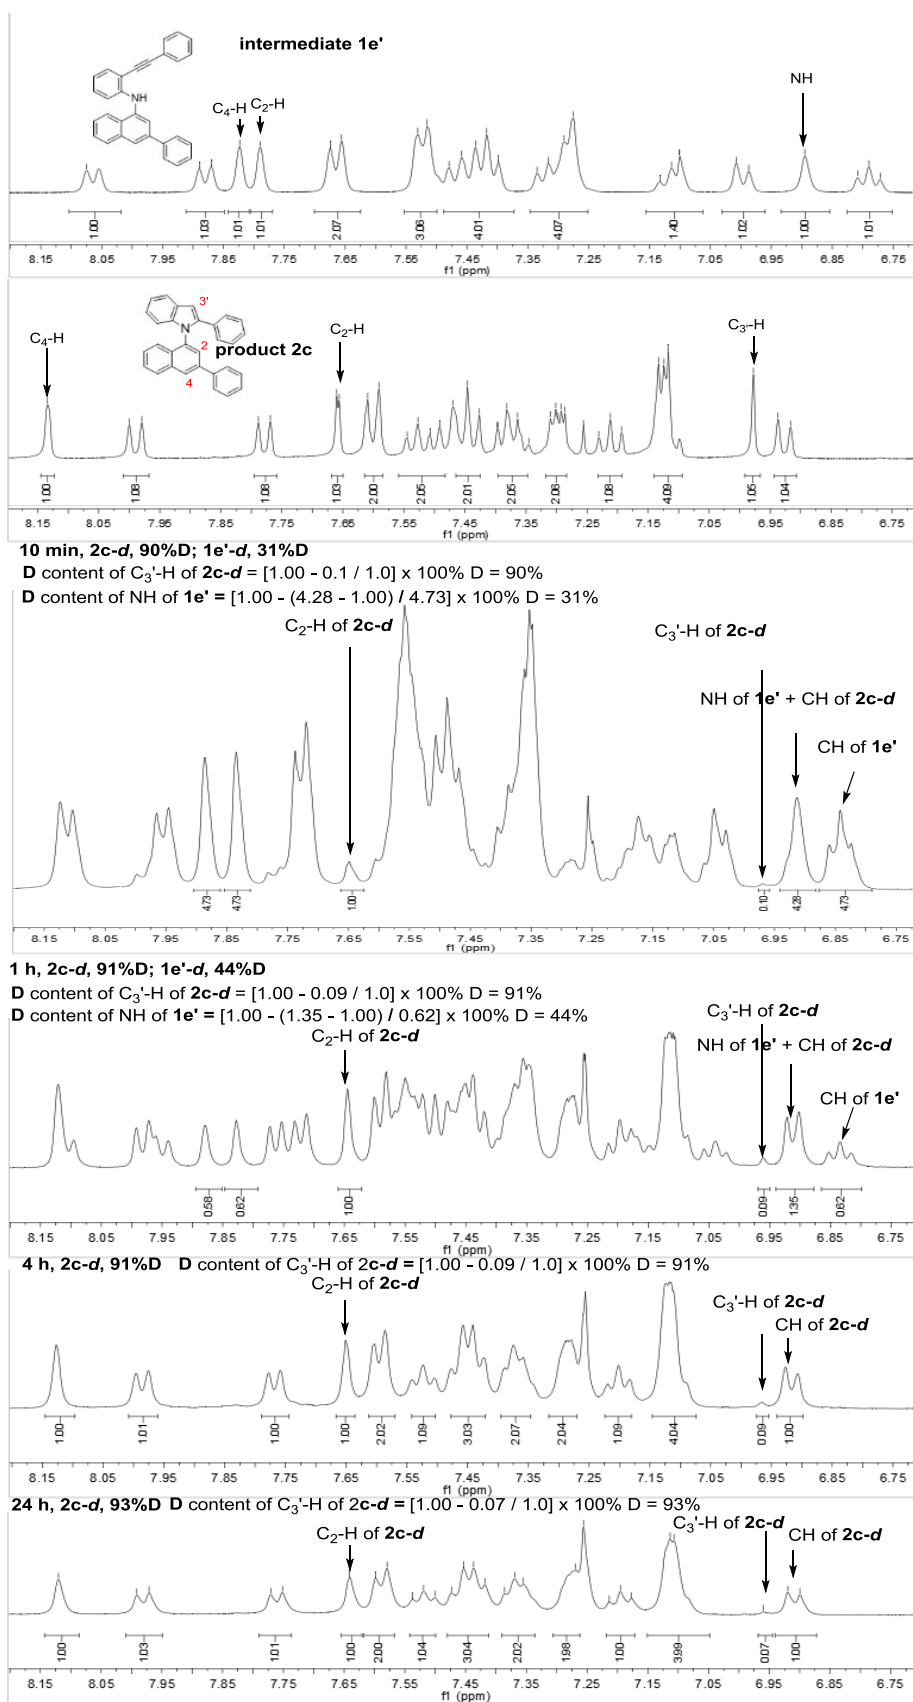

Calculation formula:  $D \text{ content of C}_3\text{'-H of } 2c\text{-d} = [1.00 - (D \text{ of C}_3\text{'-H of } 2c\text{-d}) / (D \text{ of C}_2\text{-H of } 2c\text{-d})] \times 100\%$  D

$D \text{ content of NH of } 1e' = [1.00 - (D \text{ of (NH of } 1e' + \text{CH of } 2c\text{-d}) - D \text{ of C}_2\text{-H of } 2c\text{-d}) / (D \text{ of CH of } 1e')] \times 100\%$  D

Figure S43. The <sup>1</sup>H NMR Spectrum of Eq. (S) at 10 min, 1 h, 2 h, and 24 h.

T) A Schlenk tube of 25 mL equipped with a magnetic stir bar was charged with CuI (38 mg, 0.2 mmol, 2.0 equiv.), Cs<sub>2</sub>CO<sub>3</sub> (66 mg, 0.2 mmol, 2.0 equiv.) in HFIP-OD (1.0 mL, 9.5 mmol), then, 3-Phenyl-N-(2-(phenylethynyl)phenyl)naphthalen-1-amine (**1e'**, 0.1 mmol) was added. The reaction mixture was stirred (800 r/min in IKA RCT basic) at 100 °C for 1 h under N<sub>2</sub>. After completion of the reaction, the reaction mixture was cooled to room temperature, the solvent was removed under reduced pressure, and the residue was extracted with CDCl<sub>3</sub>, for identifying by <sup>1</sup>HNMR directly without column chromatography.

### 2-phenyl-1-(3-phenylnaphthalen-1-yl)-1H-indole (**2c-d'**, 1 h, Eq. T)

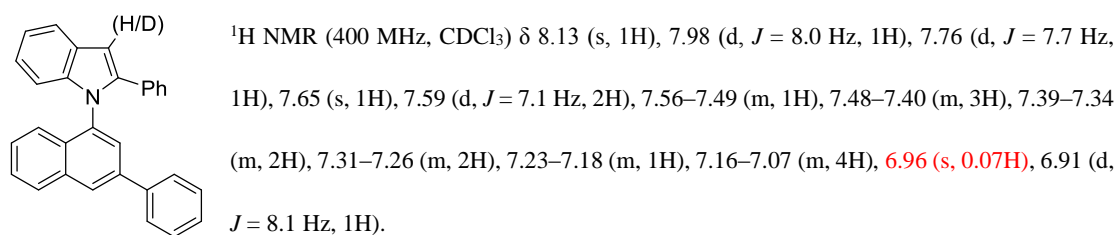

<sup>1</sup>H NMR Spectrum of **2c-d'** (1 h, Eq. T)

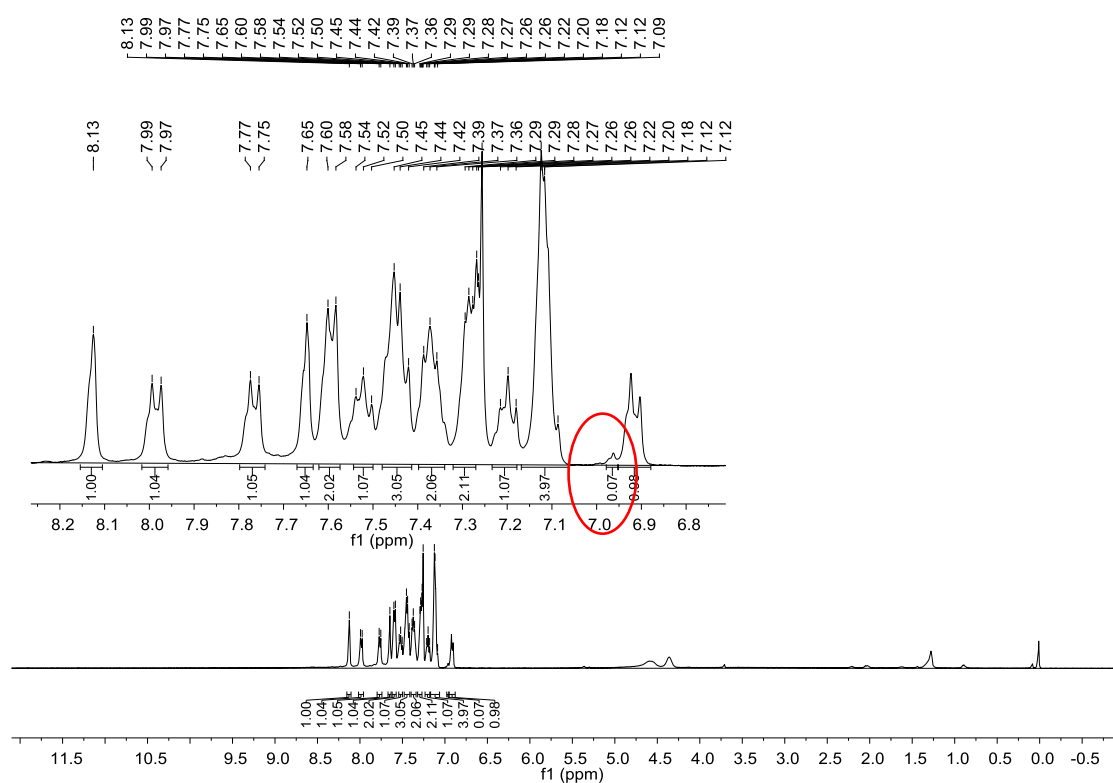

U) A Schlenk tube of 25 mL equipped with a magnetic stir bar was charged with CuI (1.9 mg, 0.01 mmol, 10 mol %), Cs<sub>2</sub>CO<sub>3</sub> (66 mg, 0.2 mmol, 2.0 equiv.), HFIP-OD (2.38 mmol) in HFIP (2.38 mmol), then, 3-Phenyl-N-(2-(phenylethynyl)phenyl)naphthalen-1-amine (**1e'**) (0.1 mmol) was added. The reaction mixture was stirred (800 r/min in IKA RCT basic) at 100 °C for 24 h under N<sub>2</sub>. After completion of the reaction, the reaction mixture was cooled to room temperature, the solvent was removed under reduced pressure, and the residue was extracted with CDCl<sub>3</sub>, for identifying by <sup>1</sup>HNMR directly without column chromatography.

**2-phenyl-1-(3-phenylnaphthalen-1-yl)-1H-indole** (Eq. U, **2c-d'**, 24 h)

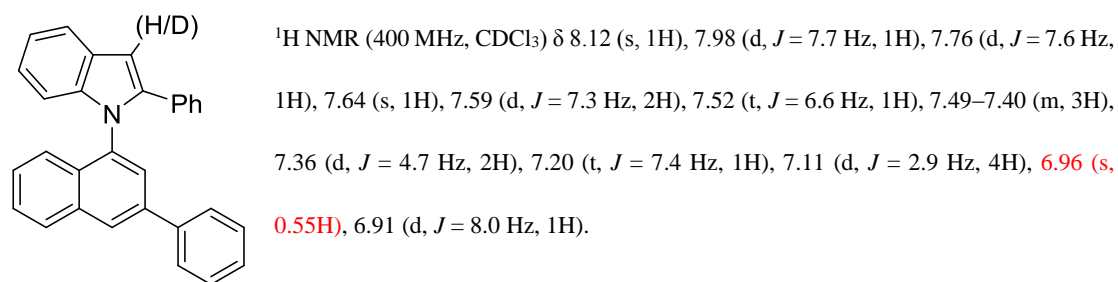

<sup>1</sup>H NMR Spectrum of **2c-d'** (24 h, Eq. U)

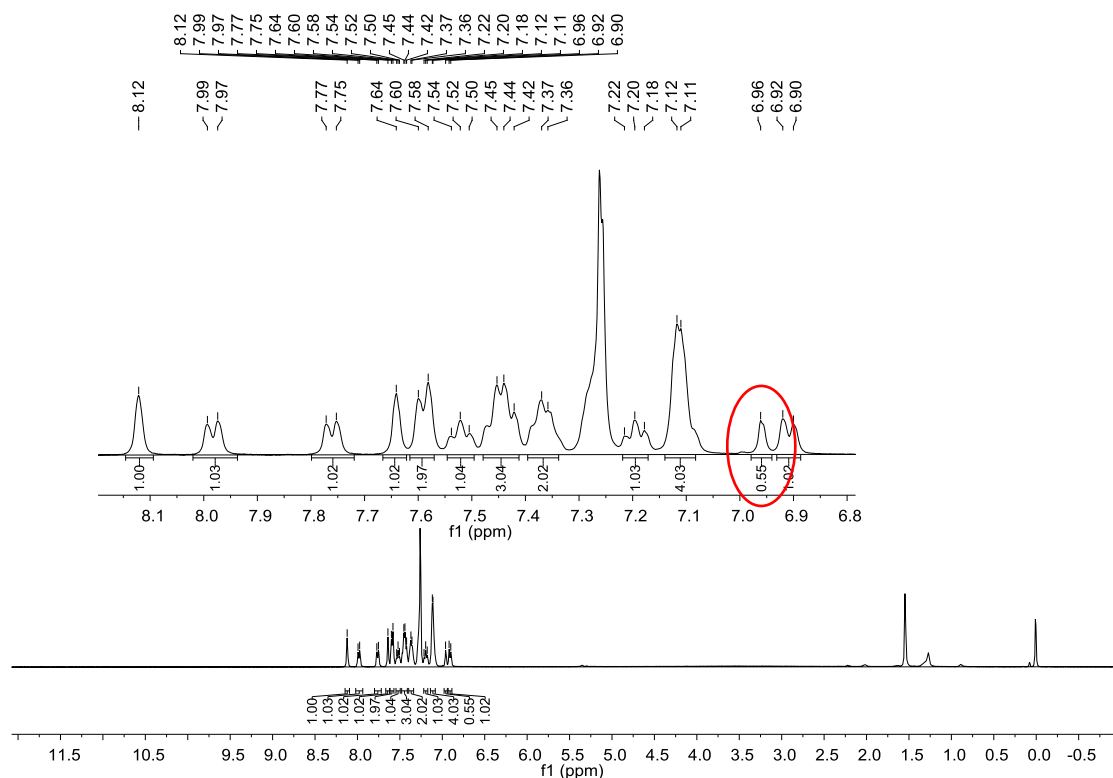

V) A Schlenk tube of 25 mL equipped with a magnetic stir bar was charged with CuI (1.9 mg, 0.01 mmol, 10 mol %), Cs<sub>2</sub>CO<sub>3</sub> (66 mg, 0.2 mmol, 2.0 equiv.), in HFIP-OD (9.5 mmol), then, **2c** (0.1 mmol) was added. The reaction mixture was stirred (800 r/min in IKA RCT basic) at 100 °C under N<sub>2</sub>, and was extracted 100 ul to monitor by <sup>1</sup>H NMR at 1 h, 4 h, 12 h, and 24 h respectively, the solvent was removed under reduced pressure, and the residue was extracted with CDCl<sub>3</sub>, for identifying by <sup>1</sup>H NMR directly without column chromatography.

**2-phenyl-1-(3-phenylnaphthalen-1-yl)-1H-indole (2c-d', Eq. V, 1 h)**

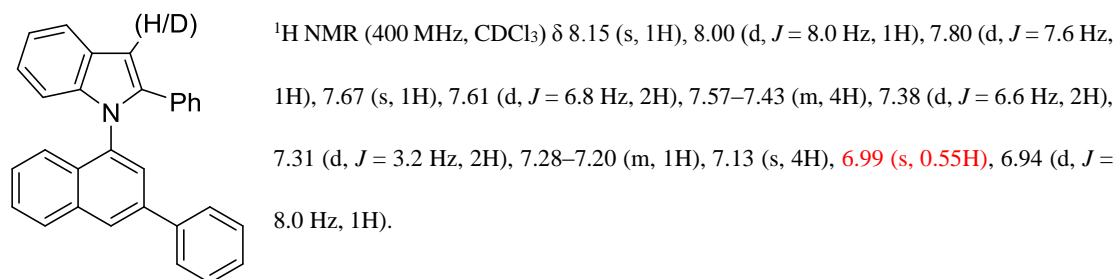

**2-phenyl-1-(3-phenylnaphthalen-1-yl)-1H-indole (2c-d', Eq. V, 4 h)**

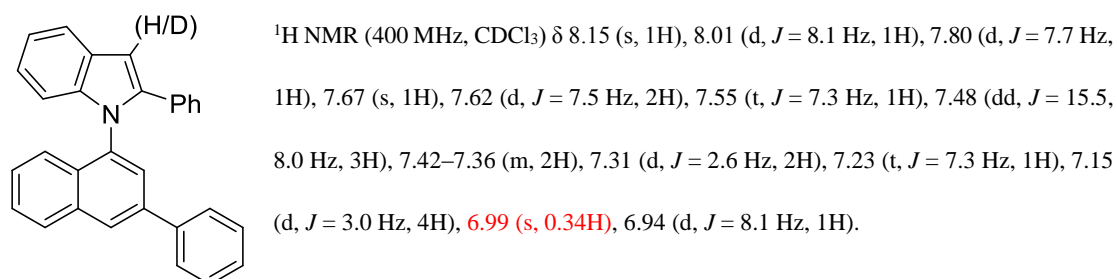

**2-phenyl-1-(3-phenylnaphthalen-1-yl)-1H-indole (2c-d', Eq. V, 12 h)**

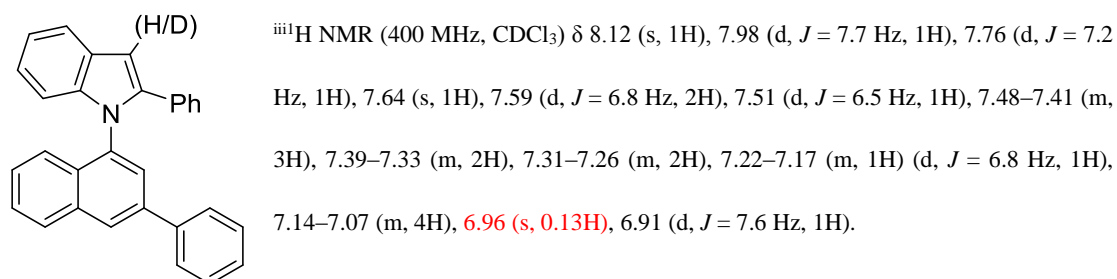

**2-phenyl-1-(3-phenylnaphthalen-1-yl)-1H-indole (2c-d', Eq. V, 24 h)**

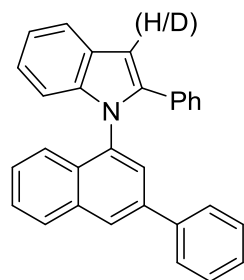

$^1\text{H NMR}$  (400 MHz,  $\text{CDCl}_3$ )  $\delta$  8.13 (s, 1H), 7.98 (d,  $J = 8.2$  Hz, 1H), 7.77 (d,  $J = 7.8$  Hz, 1H), 7.65 (s, 1H), 7.59 (d,  $J = 7.3$  Hz, 2H), 7.52 (t,  $J = 7.4$  Hz, 1H), 7.48–7.40 (m, 3H), 7.40–7.33 (m, 2H), 7.32–7.27 (m, 2H), 7.20 (t,  $J = 7.4$  Hz, 1H), 7.15–7.07 (m, 4H), **6.96 (s, 0.06H)**, 6.92 (d,  $J = 8.2$  Hz, 1H).

$^1\text{H NMR}$  Spectrum of **2c-d'** (1 h, Eq. V)

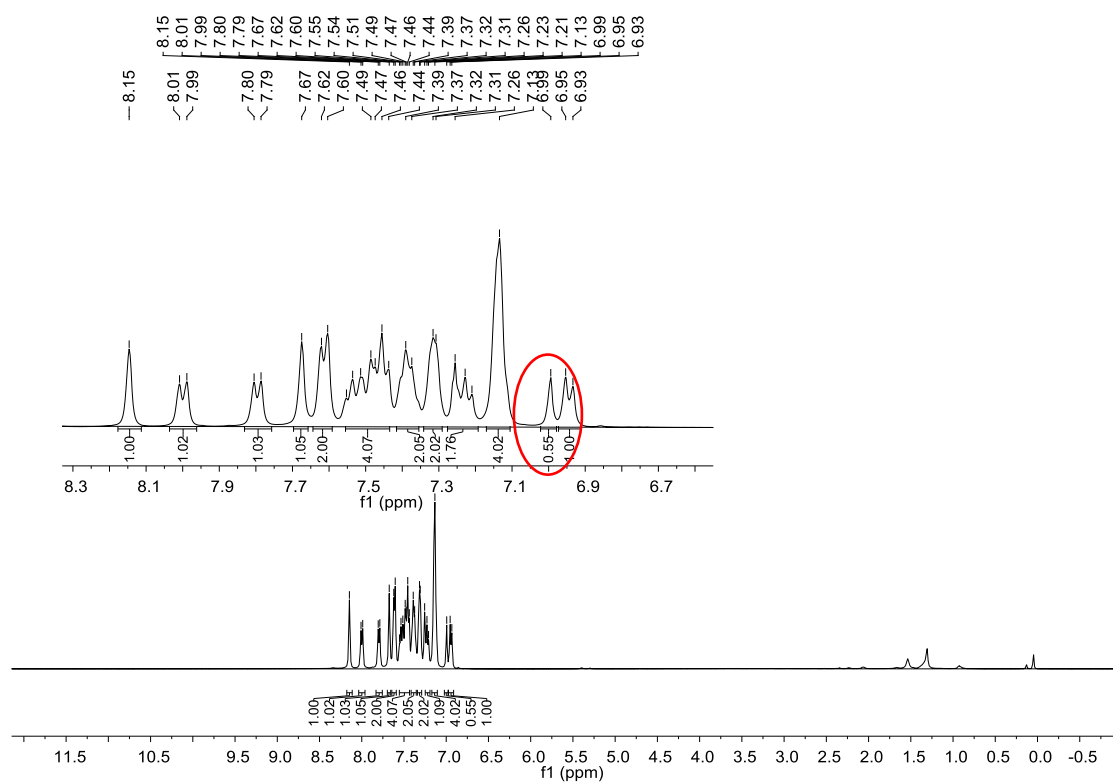

<sup>1</sup>H NMR Spectrum of **2c-d'** (4 h, Eq. V)

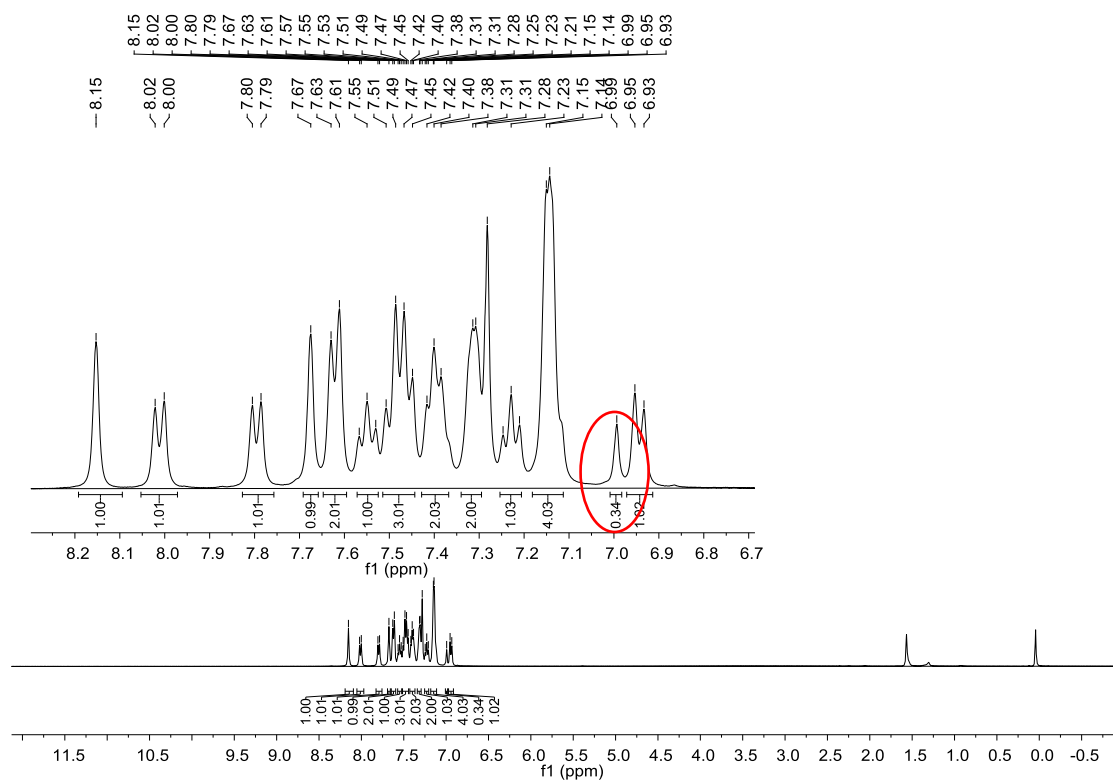

<sup>1</sup>H NMR Spectrum of **2c-d'** (12 h, Eq. V)

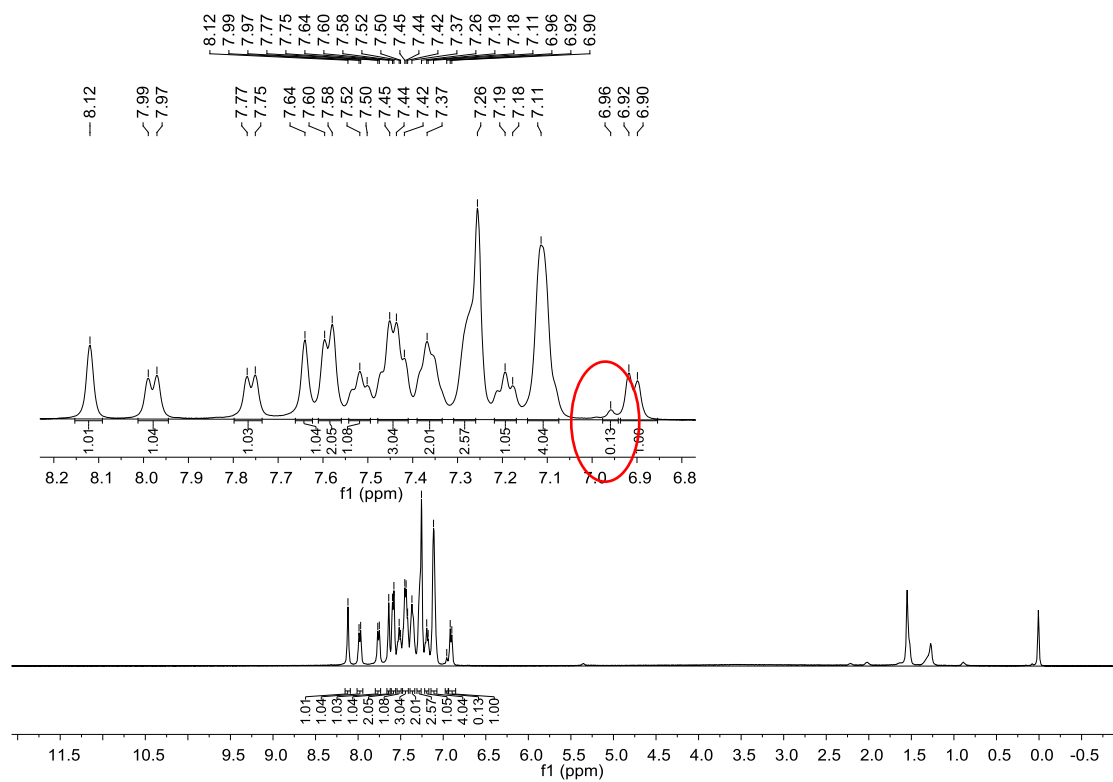

<sup>1</sup>H NMR Spectrum of **2c-d'** (24 h, Eq. V)

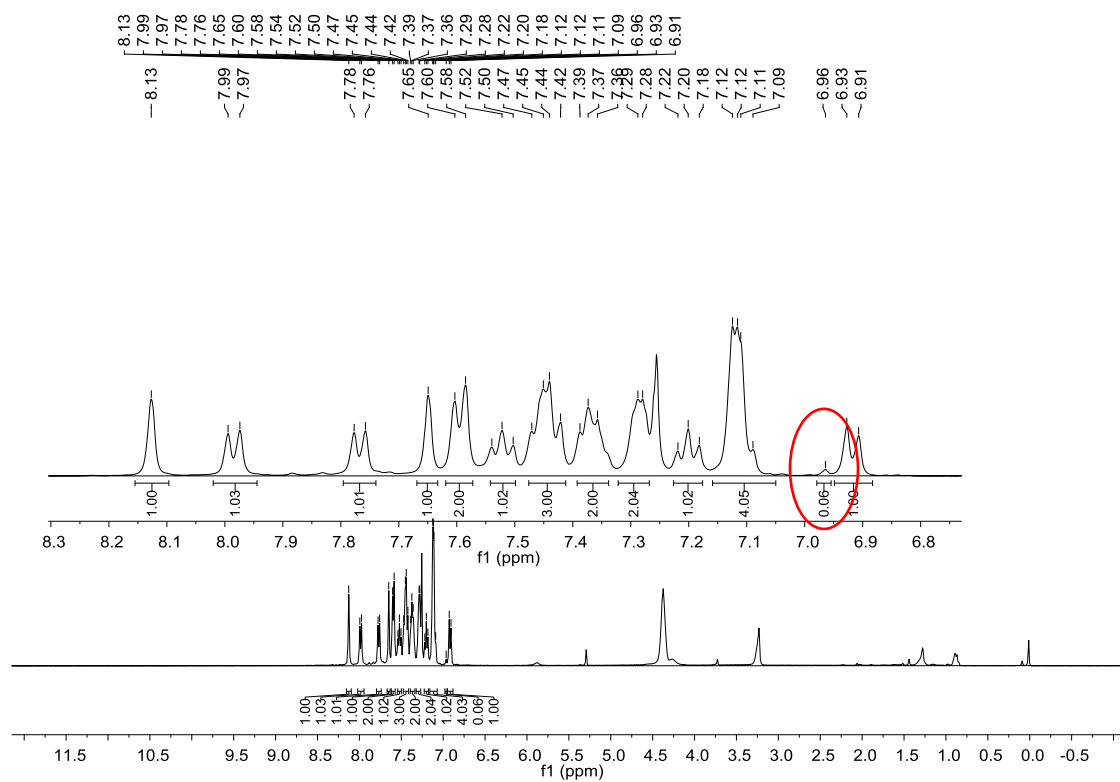

## 5. Asymmetric Synthesis.

Table S9. Optimization of the Conditions (Ligands and temperature)<sup>a</sup>

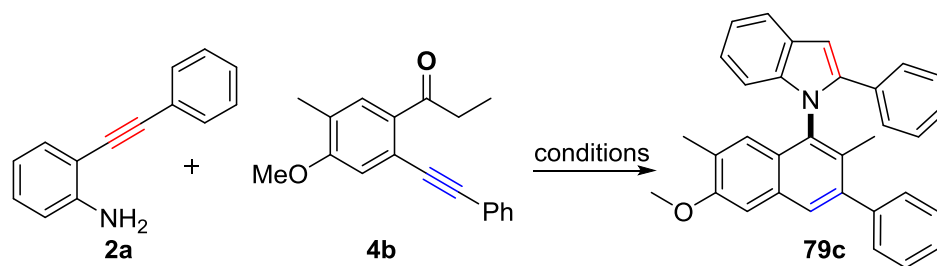

| Entry | Ligand | T(°C) | t(h) | yield | ee  |
|-------|--------|-------|------|-------|-----|
| 1     | L1     | 40    | 72   | 31%   | 6%  |
| 2     | L2     | 40    | 72   | 33%   | 23% |
| 3     | L3     | 40    | 72   | 30%   | 3%  |
| 4     | L4     | 40    | 72   | 20%   | 11% |
| 5     | L5     | 40    | 72   | 17%   | 3%  |
| 6     | L6     | 40    | 72   | 26%   | 5%  |
| 7     | L7     | 40    | 72   | 22%   | 3%  |
| 8     | L8     | 40    | 72   | 20%   | 2%  |
| 9     | L9     | 40    | 72   | 18%   | 1%  |
| 10    | L10    | 40    | 72   | 29%   | 4%  |
| 11    | L11    | 40    | 72   | 19%   | 5%  |
| 12    | L12    | 40    | 72   | 18%   | 5%  |
| 13    | L13    | 40    | 72   | 25%   | -9% |
| 14    | L14    | 40    | 72   | 30%   | 16% |
| 15    | L15    | 40    | 72   | 8%    | -3% |
| 16    | L16    | 40    | 72   | 10%   | 4%  |
| 17    | L17    | 40    | 72   | 8%    | 2%  |
| 18    | L18    | 40    | 72   | 8%    | 8%  |
| 19    | L19    | 40    | 72   | 8%    | 4%  |
| 20    | L2     | 30    | 72   | 25%   | 21% |
| 21    | L2     | 50    | 72   | 40%   | 17% |
| 22    | L2     | 60    | 72   | 55%   | 15% |
| 23    | L2     | 70    | 72   | 67%   | 10% |
| 24    | L2     | 80    | 72   | 80%   | 7%  |
| 25    | L2     | 90    | 72   | 88%   | 5%  |

<sup>a</sup>Reaction conditions: unless otherwise stated, all reactions were performed with **2a** (0.05 mmol), **4b** (0.06 mmol), CuI (5 mol%), Ligand (6 mol%), base (2.0 equiv, 0.1 mmol) in the solvent (0.5 mL) under N<sub>2</sub> protection. <sup>b</sup>GC yield based on **2a** using dodecane as internal standard.



**Table S10. Optimization of the Conditions (catalysts, ligands, temperature, and time)<sup>a</sup>**

| Entry           | Step 1               | Step 2                                                                | yield | ee   |
|-----------------|----------------------|-----------------------------------------------------------------------|-------|------|
| 1               | CuI, 30 min + 100 °C | L1, 72 h + 40 °C                                                      | 39%   | 8%   |
| 2               | CuI, 30 min + 100 °C | L2, 72 h + 40 °C                                                      | 42%   | 20%  |
| 3               | CuI, 30 min + 100 °C | L4, 72 h + 40 °C                                                      | 41%   | 12%  |
| 4               | CuI, 30 min + 100 °C | L13, 72 h + 40 °C                                                     | 42%   | -10% |
| 5               | CuI, 30 min + 100 °C | L14, 72 h + 40 °C                                                     | 40%   | 12%  |
| 6               | CuI, 30 min + 100 °C | Pd(OAc) <sub>2</sub> + L2, 72 h + 40 °C                               | 45%   | 8%   |
| 7               | CuI, 30 min + 100 °C | PdCl <sub>2</sub> + L2, 72 h + 40 °C                                  | 48%   | 12%  |
| 8               | CuI, 30 min + 100 °C | Pd <sub>2</sub> (dba) <sub>3</sub> + L2, 72 h + 40 °C                 | 44%   | 4%   |
| 9               | CuI, 30 min + 100 °C | Pd(PPh <sub>3</sub> ) <sub>4</sub> + L2, 72 h + 40 °C                 | 40%   | 6%   |
| 10              | CuI, 30 min + 100 °C | Pd(PPh <sub>3</sub> ) <sub>2</sub> Cl <sub>2</sub> + L2, 72 h + 40 °C | 45%   | 2%   |
| 11              | CuI, 30 min + 100 °C | PdCl <sub>2</sub> + L18, 72 h + 40 °C                                 | 52%   | 34%  |
| 12              | CuI, 30 min + 100 °C | PdCl <sub>2</sub> + L19, 72 h + 40 °C                                 | 49%   | 16%  |
| 13              | CuI, 30 min + 100 °C | Pd(OAc) <sub>2</sub> + L18, 72 h + 40 °C                              | 44%   | 10%  |
| 14              | CuI, 30 min + 100 °C | Pd(OAc) <sub>2</sub> + L19, 72 h + 40 °C                              | 45%   | 12%  |
| 15              | CuI, 30 min + 100 °C | PdCl <sub>2</sub> + L18, 72 h + 50 °C                                 | 55%   | 32%  |
| 16              | CuI, 30 min + 100 °C | PdCl <sub>2</sub> + L18, 72 h + 60 °C                                 | 58%   | 29%  |
| 17              | CuI, 30 min + 100 °C | PdCl <sub>2</sub> + L18, 72 h + 70 °C                                 | 58%   | 32%  |
| 18              | CuI, 30 min + 100 °C | PdCl <sub>2</sub> + L18, 72 h + 80 °C                                 | 81%   | 33%  |
| 19              | CuI, 30 min + 100 °C | PdCl <sub>2</sub> + L18, 24 h + 80 °C                                 | 80%   | 34%  |
| 20              | CuI, 30 min + 100 °C | PdCl <sub>2</sub> + L18, 24 h + 90 °C                                 | 84%   | 31%  |
| 21              | CuI, 30 min + 100 °C | PdCl <sub>2</sub> + L18, 24 h + 100 °C                                | 88%   | 28%  |
| 22              | CuI, 30 min + 90 °C  | PdCl <sub>2</sub> + L18, 24 h + 80 °C                                 | 86%   | 32%  |
| 23              | CuI, 30 min + 80 °C  | PdCl <sub>2</sub> + L18, 24 h + 80 °C                                 | 87%   | 36%  |
| 24              | CuI, 30 min + 70 °C  | PdCl <sub>2</sub> + L18, 24 h + 80 °C                                 | 87%   | 34%  |
| 25              | CuI, 30 min + 60 °C  | PdCl <sub>2</sub> + L18, 24 h + 80 °C                                 | 82%   | 30%  |
| 26              | CuI, 0 min + 80 °C   | PdCl <sub>2</sub> + L18, 24 h + 80 °C                                 | 83%   | 20%  |
| 27              | CuI, 10 min + 80 °C  | PdCl <sub>2</sub> + L18, 24 h + 80 °C                                 | 82%   | 24%  |
| 28              | CuI, 20 min + 80 °C  | PdCl <sub>2</sub> + L18, 24 h + 80 °C                                 | 84%   | 28%  |
| 29              | CuI, 40 min + 80 °C  | PdCl <sub>2</sub> + L18, 24 h + 80 °C                                 | 85%   | 34%  |
| 30              | CuI, 50 min + 80 °C  | PdCl <sub>2</sub> + L18, 24 h + 80 °C                                 | 85%   | 38%  |
| 31              | CuI, 60 min + 80 °C  | PdCl <sub>2</sub> + L18, 24 h + 80 °C                                 | 86%   | 36%  |
| 32              | CuI, 70 min + 80 °C  | PdCl <sub>2</sub> + L18, 24 h + 80 °C                                 | 88%   | 35%  |
| 33              | CuI, 50 min + 80 °C  | PdCl <sub>2</sub> + L18, 20 h + 80 °C                                 | 86%   | 36%  |
| 34              | CuI, 50 min + 80 °C  | PdCl <sub>2</sub> + L18, 15 h + 80 °C                                 | 85%   | 40%  |
| 35              | CuI, 50 min + 80 °C  | PdCl <sub>2</sub> + L18, 10 h + 80 °C                                 | 76%   | 32%  |
| 36              | CuI, 50 min + 80 °C  | PdCl <sub>2</sub> + L18, 5 h + 80 °C                                  | 70%   | 26%  |
| 37 <sup>c</sup> | CuI, 50 min + 80 °C  | PdCl <sub>2</sub> + L18, 15 h + 80 °C                                 | 85%   | 38%  |
| 38 <sup>d</sup> | CuI, 50 min + 80 °C  | PdCl <sub>2</sub> + L18, 15 h + 80 °C                                 | 85%   | 40%  |

<sup>a</sup>GC yield based on **2a** using dodecane as internal standard. <sup>b</sup>Step 1: **2a** (0.05 mmol), **4b** (0.06 mmol), CuI (5 mol %), Cs<sub>2</sub>CO<sub>3</sub> (2.0 equiv, 0.1 mmol) in HFIP (0.5 mL) under N<sub>2</sub> protection, Step 2: Pd catalyst (5 mol%) and Ligand (6 mol%) were added in the shelenk tube. <sup>c</sup>Ligand (5 mol%). <sup>d</sup>Ligand (7 mol%) .

**Table S11. Further Optimization of the Reaction Conditions (P ligand)<sup>a</sup>**

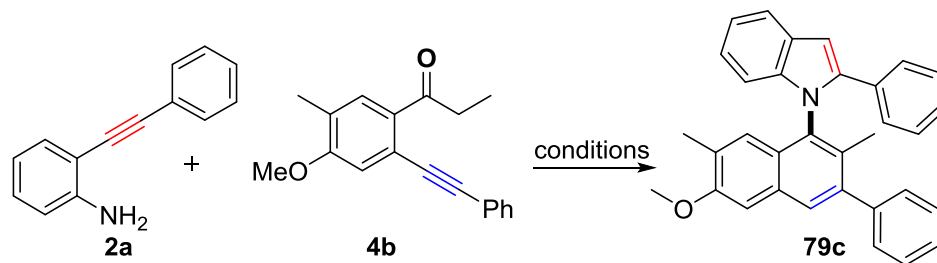

| Entry | Step 1              | Step 2            | yield | ee  |
|-------|---------------------|-------------------|-------|-----|
| 1     | CuI, 50 min + 80 °C | L20, 15 h + 80 °C | 86%   | 36% |
| 2     | CuI, 50 min + 80 °C | L21, 15 h + 80 °C | 82%   | 32% |

Figure S45. The chiral ligands in Table S9, S10 and S11

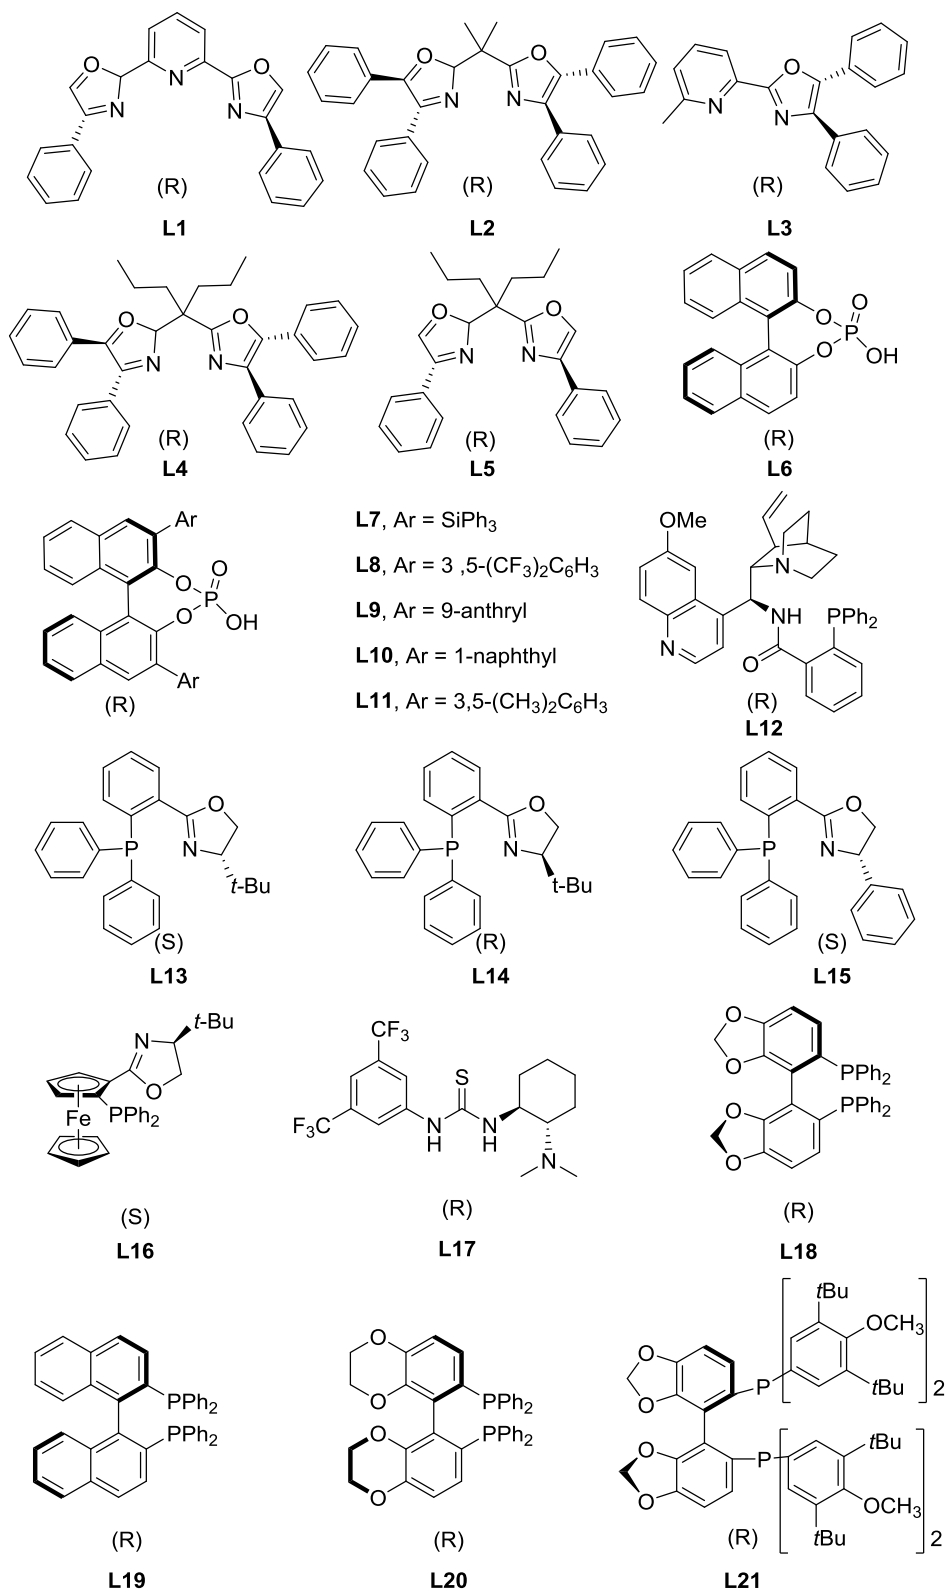

**Scheme S11. The control experiment of the asymmetric synthesis of axially chiral naphthylindoles**

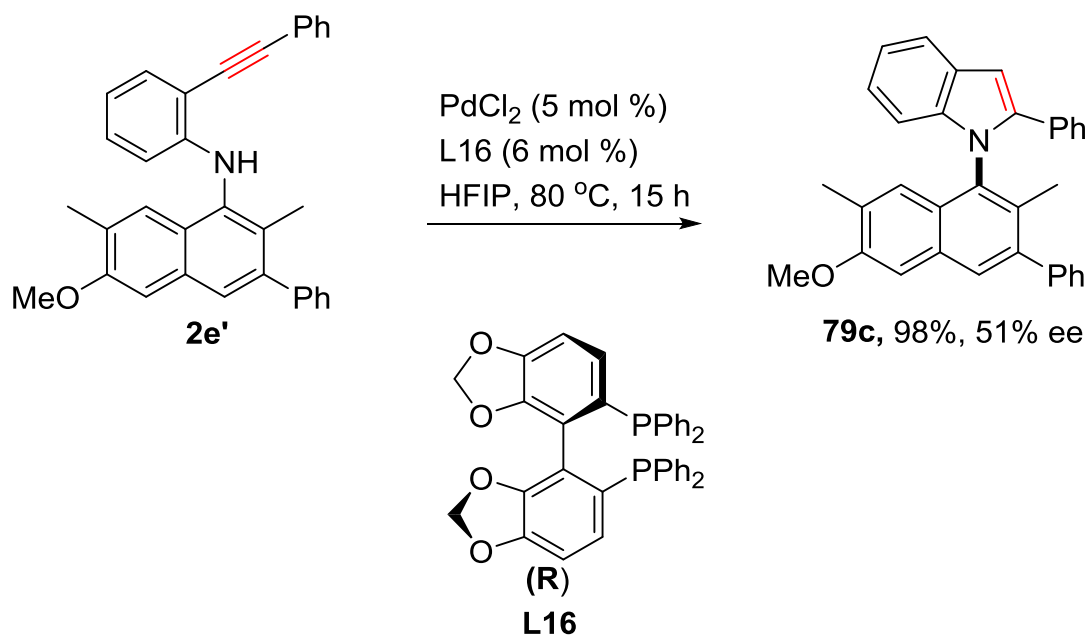

**Enantioselective of Table S9, entry 2.**

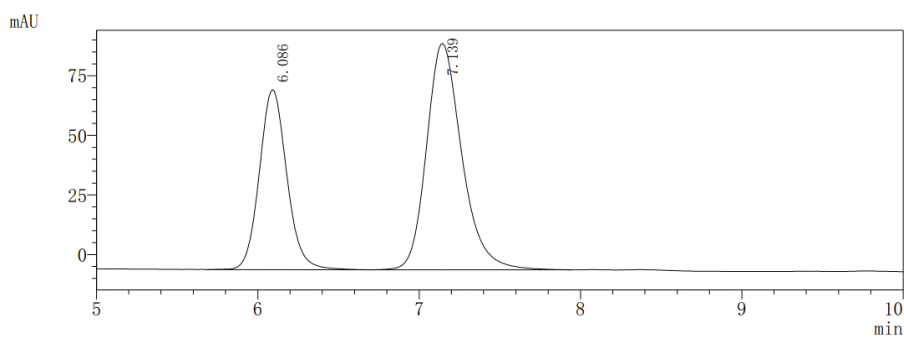

PDA Ch1 254nm 4nm

| Peak | Ret Time | Width | Area    | Height | Area % |
|------|----------|-------|---------|--------|--------|
| 1    | 6.086    | 0.318 | 893023  | 75587  | 38.135 |
| 2    | 7.139    | 0.399 | 1448740 | 95000  | 61.865 |

**Enantioselective of Table S10, entry 38.**

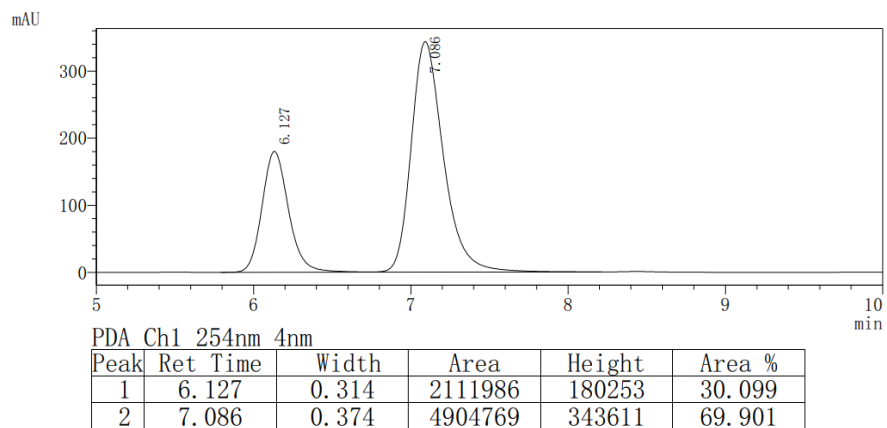

**Enantioselective of Scheme S11.**

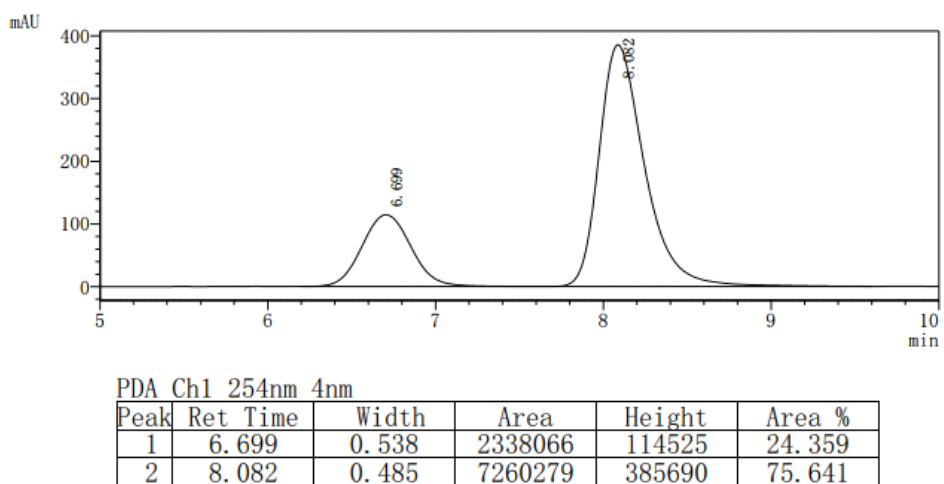

## 6. MTT assay and Enzyme-linked immunosorbent assay

### 6.1 MTT assay

Cell viability was determined by the MTT method following the manufacturer's instructions. In all assays, the compounds were quickly dissolved in DMSO and diluted in sterile culture medium before being added to the cell culture (DMSO concentration < 0.1% (v/v)). Microglial BV-2 cells were seeded in 96-well plates at a density of  $1 \times 10^4$  cells/well. After 12 h, compounds of designated concentrations (3, 10, 30 and 100  $\mu\text{M}$ ) were added. After 24 h, cells were incubated with culture medium containing 10  $\mu\text{l}$  of 5 mg/ml MTT solution (Sigma-Aldrich) for 4 h at 37  $^\circ\text{C}$ . Plates were then centrifuged to remove the supernatants, and the crystals were dissolved in 150  $\mu\text{L}$  of DMSO. The spectrophotometrical absorbance of the samples was measured using a quantified microplate reader at a wavelength of 490 nm.

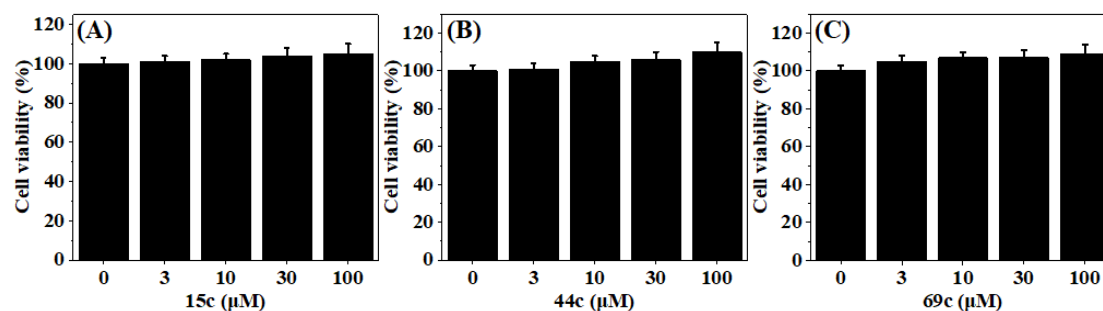

**Figure S46.** A) Cell viability was assessed by MTT assay in BV-2 cells after treatment with various concentrations of compound **15c** (0,3,10 ,30 and 100  $\mu\text{M}$ ) for 24 h. Each experiment was repeated three times in triplicate. Statistical analysis was performed using one-way analysis of variance (ANOVA) with Dunnett' post hoc test. B) Cell viability was assessed by MTT assay in BV-2 cells after treatment with various concentrations of compound **44c** (0, 3,10 ,30 and 100  $\mu\text{M}$ ) for 24 h. Each experiment was repeated three times in triplicate. Statistical analysis was performed using one-way analysis of variance (ANOVA) with Dunnett' post hoc test. C) Cell viability was assessed by MTT assay in BV-2 cells after treatment with various concentrations of compound **69c** (0, 3,10 ,30 and 100  $\mu\text{M}$ ) for 24 h. Each experiment was repeated three times in triplicate. Statistical analysis was performed using one-way analysis of variance (ANOVA) with Dunnett' post hoc test.

### 6.2 Enzyme-linked immunosorbent assay

To evaluate the anti-inflammatory bioactivity of this new type of naphthylindole with reported reference compound, we detected the effect of **indomethacin** (an indole derivative, non-steroidal anti-inflammatory drug),

compound **15c**, and compound **47c** on the expression of IL-1 $\beta$  and TNF- $\alpha$  in BV-2 microglial cells by using a commercial ELISA kit (PEPROTECH, USA). BV-2 microglial cells were pretreated with **indomethacin** (10 $\mu$ M) and compounds **15c** (10 $\mu$ M), **47c** (1 $\mu$ M) for 1 h before being stimulated with LPS (1  $\mu$ g/mL) for another 24 h. **Indomethacin** and compound **15c** both attenuated LPS-induced IL-1 $\beta$  (Figure 37, A) and TNF- $\alpha$  (Figure 37, B) secretion in BV-2 microglial cells (LPS 1  $\mu$ g/mL) compared with the LPS group, \* $P$  < 0.05, \*\* $P$  < 0.01, versus the LPS group. Compound **47c** also attenuated LPS-induced IL-1 $\beta$  (Figure S47, A) and TNF- $\alpha$  (Figure S47, B) activation in BV-2 microglial cells (LPS 1  $\mu$ g/mL).

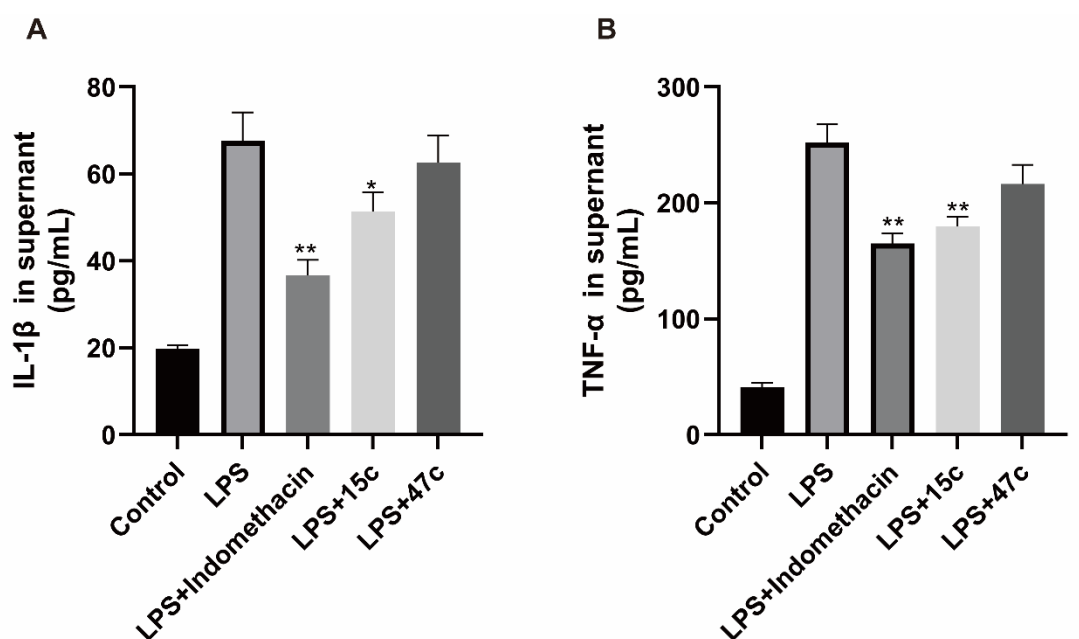

**Figure S47** The BV-2 cells were pretreated with positive control indomethacin (non-steroidal anti-inflammatory drug, 10 $\mu$ M) and compounds **15c** (10 $\mu$ M), **47c** (1 $\mu$ M) for 1 h, then incubated with LPS (1  $\mu$ g/mL) for 24 h. The concentrations of IL-1 $\beta$  (A) and TNF- $\alpha$  (B) in the supernatants were quantified using a commercial ELISA kit (PEPROTECH, USA). (A) IL-1 $\beta$  (B) TNF- $\alpha$ . \* $P$  < 0.05, \*\* $P$  < 0.01, versus the LPS group.

### 6.3 ELISA

Supernatants of BV-2 microglial cells were collected and processed (1500 rpm, 10 min, 4  $^{\circ}$ C). IL-1 $\beta$  and TNF- $\alpha$ , levels were evaluated by ELISA, according to the manufacturer's instructions (PeproTech, USA). Cytokine levels were measured in a plate reader at 405 nm, with wavelength correction at 650 nm. Cytokine concentrations (pg/mL) were determined using a standard calibration curve.

## 7. X-ray Crystallographic Data of 15c

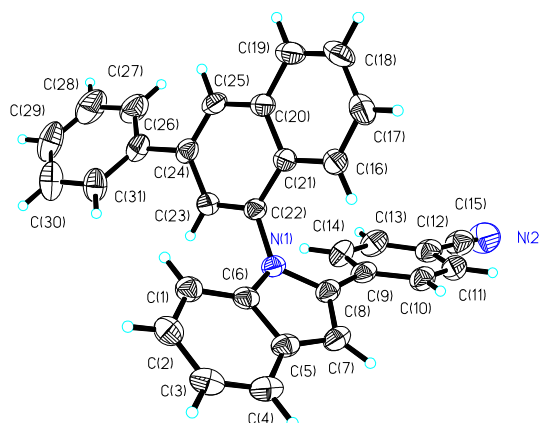

Figure S48. X-ray crystal structure of compound 15c (CCDC number: 2082723)

Table S12. Summary of X-ray crystallographic data for compound 15c.

|                                  |                    |
|----------------------------------|--------------------|
| Empirical formula                | $C_{31}H_{20}N_2$  |
| Formula weight                   | 420.49             |
| Temperature/K                    | 293(2)             |
| Crystal system                   | monoclinic         |
| Space group                      | P21/c              |
| a/Å                              | 18.4424(11)        |
| b/Å                              | 17.3145(11)        |
| c/Å                              | 7.3180(5)          |
| $\alpha/^\circ$                  | 90.00              |
| $\beta/^\circ$                   | 93.009(2)          |
| $\gamma/^\circ$                  | 90.00              |
| Volume/Å <sup>3</sup>            | 2333.6(3)          |
| Z                                | 4                  |
| $\rho_{\text{calc}}/\text{cm}^3$ | 1.197              |
| $\mu/\text{mm}^{-1}$             | 0.070              |
| F(000)                           | 880.0              |
| Crystal size/mm <sup>3</sup>     | 0.30 × 0.28 × 0.25 |



|                                                  |                                                            |
|--------------------------------------------------|------------------------------------------------------------|
| Radiation                                        | MoK $\alpha$ ( $\lambda = 0.71073$ )                       |
| 2 $\Theta$ range for data collection/ $^{\circ}$ | 4.7 to 50.02                                               |
| Index ranges                                     | $-21 \leq h \leq 21, -20 \leq k \leq 20, -8 \leq l \leq 8$ |
| Reflections collected                            | 22244                                                      |
| Independent reflections                          | 4097 [R(int) = 0.0281]                                     |
| Data/restraints/parameters                       | 4097/0/298                                                 |
| Goodness-of-fit on F <sup>2</sup>                | 1.085                                                      |
| Final R indexes [ $I \geq 2\sigma(I)$ ]          | R <sub>1</sub> = 0.0393, wR <sub>2</sub> = 0.1025          |
| Final R indexes [all data]                       | R <sub>1</sub> = 0.0422, wR <sub>2</sub> = 0.1048          |
| Largest diff. peak/hole / e $\text{\AA}^{-3}$    | 0.15/-0.20                                                 |

## 8. Preparation of Substrates

### 8.1. Synthesis of the *o*-Amino Arylalkynes

A)

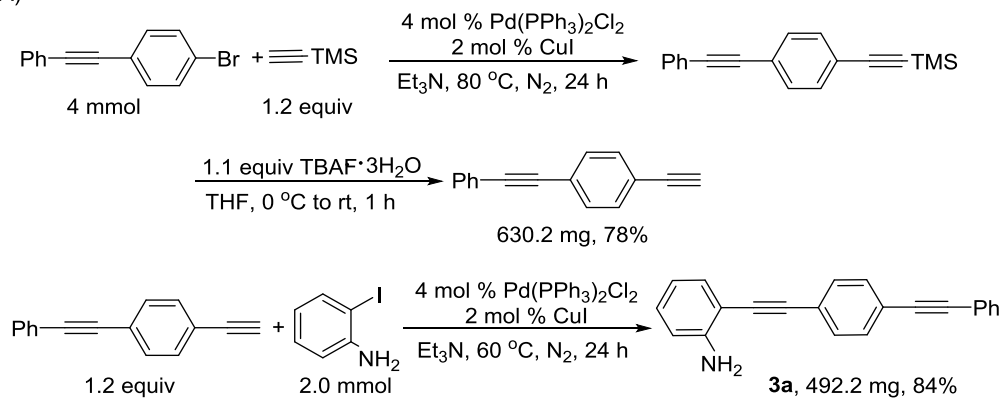

The preparations of this compound was performed according to a literature reference.<sup>12</sup> A Schlenk tube of 100 mL equipped with a magnetic stir bar was charged with Pd(PPh<sub>3</sub>)<sub>2</sub>Cl<sub>2</sub> (112.2 mg, 0.16 mmol, 4 mol %), CuI (15.2 mg, 0.08 mmol, 2 mol %), and 1-bromo-4-(phenylethynyl)benzene (1.028 g, 4 mmol) in triethylamine (16.0 mL); then, ethynyltrimethylsilane (490.0 mg, 5.0 mmol) were added. The reaction mixture was stirred at 80 °C 24 h under N<sub>2</sub>. After the starting material was consumed, the mixture was quenched with saturated NH<sub>4</sub>Cl solution and extracted with ethyl acetate. The combined organic extracts were washed with water and brine, and dried over anhydrous Na<sub>2</sub>SO<sub>4</sub> and concentrated in vacuo. Then the reaction mixture was filtered through a pad of silica gel and washed with diethyl ether. The solvent was evaporated under the reduced pressure to afford trimethyl((4-(phenylethynyl)phenyl)ethynyl)silane as a crude product, which was used directly without further purification for the next step.

To a solution of the above crude product in THF (16 mL) was added TBAF·3H<sub>2</sub>O (1.271 g, 4.4 mmol, 1.1 equiv) at 0 °C. The resulting solution was warmed up to room temperature and stirred for 1 h. Then the mixture was quenched with NH<sub>4</sub>Cl solution and extracted with dichloromethane. The combined organic extracts were washed with water and brine, and dried over anhydrous Na<sub>2</sub>SO<sub>4</sub> and concentrated in vacuo. The crude product was purified by flash column chromatography on silica gel to give the 1-ethynyl-4-(phenylethynyl)benzene (630.2 mg, 78%) as a white solid. <sup>1</sup>H NMR (400 MHz, CDCl<sub>3</sub>) δ 7.62–7.57 (m, 2H), 7.53 (s, 4H), 7.42–7.36 (m, 3H), 3.23 (s, 1H). <sup>13</sup>C NMR (101 MHz, CDCl<sub>3</sub>) δ 131.9, 131.5, 131.3, 128.4, 128.3, 123.6, 122.8, 121.8, 91.3, 88.8, 83.2, 78.9.

A Schlenk tube of 50 mL equipped with a magnetic stir bar was charged with Pd(PPh<sub>3</sub>)<sub>2</sub>Cl<sub>2</sub> (56.1 mg, 0.08 mmol, 4 mol%), CuI (7.6 mg, 0.04 mmol, 2 mol %), and 1-ethynyl-4-(phenylethynyl)benzene (404.0 mg, 2.4 mmol) in triethylamine (8 mL); then, *o*-iodoaniline (438.0 mg, 2 mmol) were added. The reaction mixture was stirred at

60 °C for 24 h under N<sub>2</sub>. After the starting material was consumed, the mixture was quenched with saturated NH<sub>4</sub>Cl solution and extracted with ethyl acetate. The combined organic extracts were washed with water and brine, and dried over anhydrous Na<sub>2</sub>SO<sub>4</sub> and concentrated in vacuo. The crude product was purified by flash column chromatography on silica gel to give the desired 2-((4-(phenylethynyl)phenyl)ethynyl)aniline (492.2 mg, 84%) as a white solid. <sup>1</sup>H NMR (400 MHz, CDCl<sub>3</sub>) δ 7.59–7.47 (m, 6H), 7.41–7.32 (m, 4H), 7.16 (t, *J* = 7.6 Hz, 1H), 6.83–6.60 (m, 2H), 4.29 (s, 2H). <sup>13</sup>C NMR (101 MHz, CDCl<sub>3</sub>) δ 147.8, 132.1, 131.5, 131.5, 131.3, 129.9, 128.4, 128.3, 123.1, 122.9, 118.0, 114.3, 107.6, 94.4, 91.2, 89.0, 87.8.

B)

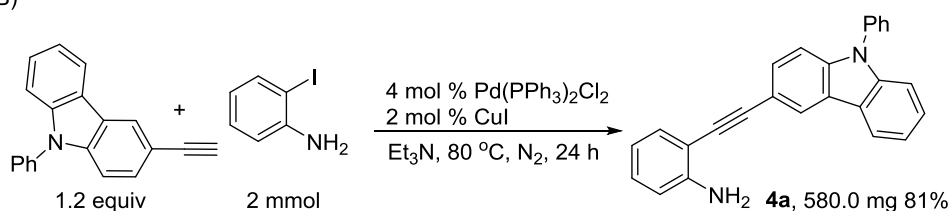

A Schlenk tube of 50 mL equipped with a magnetic stir bar was charged with Pd(PPh<sub>3</sub>)<sub>2</sub>Cl<sub>2</sub> (56.1 mg, 0.2 mmol, 4 mol %), CuI (7.6 mg, 0.1 mmol, 2 mol %), and 3-bromo-9-phenyl-9H-carbazole (640.8 mg, 2.4 mmol) in triethylamine (8 mL); then, o-iodoaniline (438.0 mg, 2 mmol) were added. The reaction mixture was stirred at 60 °C for 24 h under N<sub>2</sub>. After the starting material was consumed, the mixture was quenched with saturated NH<sub>4</sub>Cl solution and extracted with ethyl acetate. The combined organic extracts were washed with water and brine, and dried over anhydrous Na<sub>2</sub>SO<sub>4</sub> and concentrated in vacuo. The crude product was purified by flash column chromatography on silica gel to give the desired 2-((9-phenyl-9H-carbazol-3-yl)ethynyl)aniline (580.0 mg, 81%) as a white solid. <sup>1</sup>H NMR (400 MHz, CDCl<sub>3</sub>) δ 8.35 (s, 1H), 8.15 (d, *J* = 7.7 Hz, 1H), 7.63 (t, *J* = 7.7 Hz, 2H), 7.57 (t, *J* = 7.7 Hz, 3H), 7.52–7.46 (m, 1H), 7.43 (t, *J* = 8.7 Hz, 3H), 7.39 – 7.29 (m, 1H), 7.16 (t, *J* = 7.7 Hz, 1H), 6.78 – 6.73 (m, 2H), 4.34 (s, 2H). <sup>13</sup>C NMR (101 MHz, CDCl<sub>3</sub>) δ 147.6, 141.3, 140.4, 137.2, 132.0, 129.9, 129.4, 129.2, 127.7, 127.0, 126.4, 123.7, 123.3, 122.8, 120.4, 120.4, 117.9, 114.4, 114.2, 109.9, 109.8, 108.5, 95.8, 84.1. HRMS (EI) *m/z*: [M]<sup>+</sup> calcd for C<sub>26</sub>H<sub>18</sub>N<sub>2</sub> 358.1470; found 358.1472.

## General procedure for the synthesis of ortho-alkynylanilines

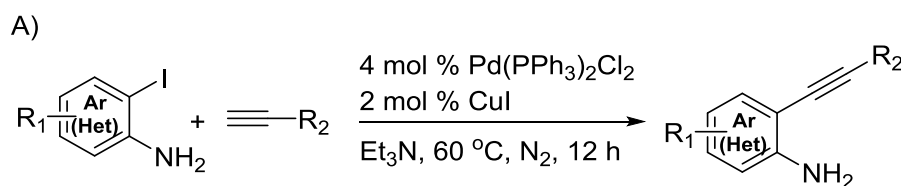

The preparations of 1-(2-bromo-4-(dimethylamino)phenyl)ethanone was performed according to a literature reference.<sup>14</sup> To a 100 mL Schlenk tube charged with 2-Iodoaniline (2 mmol, 1.0 equiv), Pd(PPh<sub>3</sub>)<sub>2</sub>Cl<sub>2</sub> (0.04 mmol, 2 mol %), and CuI (0.08 mmol, 4 mol %) in degassed Et<sub>3</sub>N (5 mL) was added aryl alkynes (2.4 mmol, 1.2 equiv), and the resulting solution was stirred at 60 °C for 12 h. Upon completion, the solvent was removed under reduced pressure, and the residue was extracted with EtOAc (3 x 5 mL). The combined organic layer was dried over Na<sub>2</sub>SO<sub>4</sub> and concentrated. The residue was purified by a silica gel flash chromatography (petroleum ether / ethyl acetate = 10 / 1) to afford products.

### 2-((4-iodophenyl)ethynyl)aniline (5a)

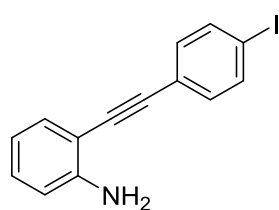

The title compound was prepared according to the general procedure and purified by column chromatography on silica gel and eluted with petroleum ether/ ethyl acetate (20/1) to afford a white powder in 78% yield (497.6 mg). <sup>1</sup>H NMR (400 MHz, CDCl<sub>3</sub>) δ 7.71 (d, *J* = 7.9 Hz, 2H), 7.39 (d, *J* = 7.5 Hz, 1H), 7.27 (d, *J* = 8.0 Hz, 2H), 7.18 (t, *J* = 7.6 Hz, 1H), 6.80–6.70 (m, 2H), 4.28 (s, 2H). <sup>13</sup>C NMR (101 MHz, CDCl<sub>3</sub>) δ 147.7, 137.4, 132.8, 132.1, 129.9, 122.7, 118.0, 114.3, 107.4, 93.9, 93.7, 87.3. HRMS (EI) *m/z*: [M]<sup>+</sup> calcd for C<sub>14</sub>H<sub>10</sub>I 318.9858; found 318.9854.

### 2-(dec-1-yn-1-yl)aniline (6a)

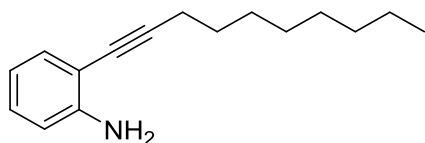

The title compound was prepared according to the general procedure and purified by column chromatography on silica gel and eluted with petroleum ether/ ethyl acetate (20/1) to afford a yellow oil in 88% yield (403.4 mg). <sup>1</sup>H NMR (400 MHz, CDCl<sub>3</sub>) δ 7.34–7.18 (m, 1H), 7.09 (t, *J* = 7.7 Hz, 1H), 6.68 (t, *J* = 7.6 Hz, 2H), 4.17 (s, 2H), 2.48 (t, *J* = 7.0 Hz, 2H), 1.63 (dd, *J* = 14.4, 7.2 Hz, 2H), 1.53 – 1.43 (m, 2H), 1.40–1.27 (m, 8H), 0.92 (t, *J* = 5.8 Hz, 3H). <sup>13</sup>C NMR (101 MHz, CDCl<sub>3</sub>) δ 147.5, 131.9, 128.6, 117.7, 114.0, 108.9, 95.7, 76.9, 31.7, 29.1, 29.0, 28.9, 22.6, 19.5, 14.0. HRMS (EI) *m/z*: [M]<sup>+</sup> calcd for C<sub>16</sub>H<sub>23</sub>N 229.1830; found 229.1831.

#### methyl 11-(2-aminophenyl)undec-10-ynoate (7a)

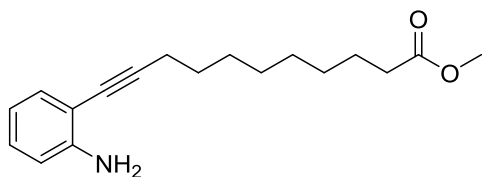

The title compound was prepared according to the general procedure and purified by column chromatography on silica gel and eluted with petroleum ether/ ethyl acetate (20/1) to afford a white powder in 86% yield (493.6 mg). <sup>1</sup>H NMR (400 MHz, CDCl<sub>3</sub>) δ 7.22 (d, *J* = 7.6 Hz, 1H), 7.04 (t, *J* = 7.6 Hz, 1H), 6.67-6.59 (m, 2H), 4.16 (s, 2H), 3.64 (s, 3H), 2.44 (t, *J* = 7.0 Hz, 2H), 2.29 (t, *J* = 7.5 Hz, 2H), 1.66 – 1.52 (m, 4H), 1.44 (s, 2H), 1.31 (s, 6H). <sup>13</sup>C NMR (101 MHz, CDCl<sub>3</sub>) δ 174.0, 147.5, 131.8, 128.6, 117.5, 113.9, 108.7, 95.4, 51.2, 33.8, 28.9, 28.9, 28.7, 28.6, 24.7, 19.4. HRMS (EI) *m/z*: [M]<sup>+</sup> calcd for C<sub>18</sub>H<sub>25</sub>NO<sub>2</sub> 287.1885; found 287.1882.

#### 2-(3-morpholinoprop-1-yn-1-yl)aniline (8a)

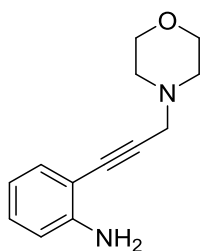

The title compound was prepared according to the general procedure and purified by column chromatography on silica gel and eluted with petroleum ether/ ethyl acetate (20/1) to afford a white powder in 88% yield (380.4 mg). <sup>1</sup>H NMR (400 MHz, CDCl<sub>3</sub>) δ 7.24 (s, 1H), 7.08 (t, *J* = 7.7 Hz, 1H), 6.65 (t, *J* = 9.1 Hz, 2H), 4.16 (s, 2H), 3.74 (d, *J* = 3.7 Hz, 4H), 3.55 (s, 2H), 2.62 (s, 4H). <sup>13</sup>C NMR (101 MHz, CDCl<sub>3</sub>) δ 147.7, 132.1, 129.3, 117.5, 114.0, 107.4, 89.0, 82.0, 66.6, 52.2, 48.0. HRMS (EI) *m/z*: [M]<sup>+</sup> calcd for C<sub>13</sub>H<sub>16</sub>N<sub>2</sub>O 216.1263; found 216.1268.

#### 4-(phenylethynyl)pyridin-3-amine (9a)

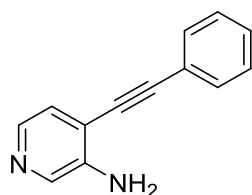

The title compound was prepared according to the general procedure and purified by column chromatography on silica gel and eluted with petroleum ether/ ethyl acetate (20/1) to afford a white powder in 81% yield (314.3 mg). <sup>1</sup>H NMR (400 MHz, CDCl<sub>3</sub>) δ 8.15 (s, 1H), 7.96 (d, *J* = 4.4 Hz, 1H), 7.53 (d, *J* = 3.0 Hz, 2H), 7.37 (s, 3H), 7.18 (d, *J* = 4.3 Hz, 1H), 4.32 (s, 2H). <sup>13</sup>C NMR (101 MHz, CDCl<sub>3</sub>) δ 143.0, 138.8, 136.9, 131.5, 128.9, 128.4, 124.9, 122.1, 114.5, 98.2, 83.2. HRMS (EI) *m/z*: [M]<sup>+</sup> calcd for C<sub>13</sub>H<sub>10</sub>N<sub>2</sub> 194.0844; found 194.0845.

#### 4-(thiophen-2-ylethynyl)pyridin-3-amine (10a)

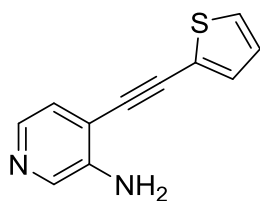

The title compound was prepared according to the general procedure and purified by column chromatography on silica gel and eluted with petroleum ether/ ethyl acetate (20/1) to afford a white powder in 83% yield (332.0 mg). <sup>1</sup>H NMR (400 MHz, CDCl<sub>3</sub>) δ 8.15 (s, 1H), 7.95 (s, 1H), 7.57 (s, 1H), 7.32 (s, 1H), 7.18 (dd, *J* = 11.0, 4.1 Hz, 2H), 4.25 (s, 2H). <sup>13</sup>C NMR (101 MHz, CDCl<sub>3</sub>) δ 143.0, 138.9, 136.9, 129.6, 129.5, 125.7, 124.9, 121.2, 114.6, 93.3, 82.8. HRMS (EI) *m/z*: [M]<sup>+</sup> calcd for C<sub>13</sub>H<sub>10</sub>N<sub>2</sub> 200.0408; found 200.0405.

## 8.2. Synthesis of the *o*-Carbonyl Arylalkynes

C)

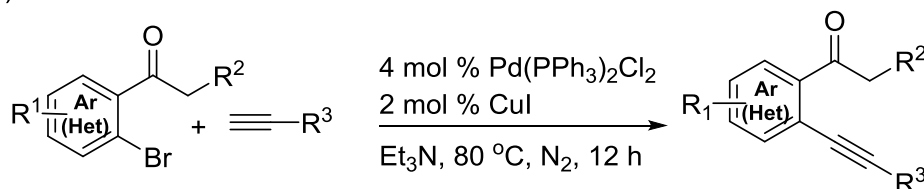

The preparations of 1-(2-bromo-4-(dimethylamino)phenyl)ethanone was performed according to a literature reference.<sup>13</sup> To a 100 mL Schlenk tube charged with 1-(2-bromophenyl)ethanone (398.1 mg, 2.0 mmol), Pd(PPh<sub>3</sub>)<sub>2</sub>Cl<sub>2</sub> (0.04 mmol, 2 mol %), and CuI (0.08 mmol, 4 mol %) in degassed Et<sub>3</sub>N (5 mL) was added alkynes (2.4 mmol, 1.2 equiv), and the resulting solution was stirred at 80 °C for 12 h. Upon completion, the solvent was removed under reduced pressure, and the residue was extracted with EtOAc (3 x 5 mL). The combined organic layer was dried over Na<sub>2</sub>SO<sub>4</sub> and concentrated. The residue was purified by a silica gel flash chromatography (petroleum ether / ethyl acetate = 20 / 1) to afford products in good yields ranging from 75% to 93%.

#### 1-(4-methoxy-2-(phenylethynyl)phenyl)ethan-1-one (2b)

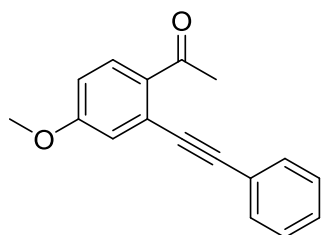

The title compound was prepared according to the general procedure and purified by column chromatography on silica gel and eluted with petroleum ether/ ethyl acetate (20/1) to afford a white powder in 93% yield (465.0 mg). <sup>1</sup>H NMR (400 MHz, CDCl<sub>3</sub>) δ 7.84 (d, *J* = 8.8 Hz, 1H), 7.60–7.54 (m, 3.0 Hz, 2H),

7.39 – 7.35 (m, 3H), 7.11 (d, *J* = 2.6 Hz, 1H), 6.91 (dd, *J* = 8.8, 2.6 Hz, 1H), 3.87 (s, 3H), 2.77 (s, 3H). HRMS (EI) *m/z*: [M]<sup>+</sup> calcd for C<sub>17</sub>H<sub>14</sub>O<sub>2</sub> 250.0994; found 250.0992.

### 1-(4-methoxy-5-methyl-2-(phenylethynyl)phenyl)ethan-1-one (3b)

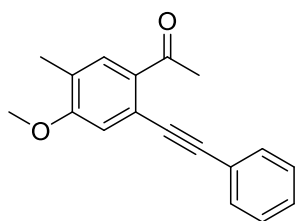

The title compound was prepared according to the general procedure and purified by column chromatography on silica gel and eluted with petroleum ether/ ethyl acetate (20/1) to afford a white powder in 91% yield (480.5 mg). <sup>1</sup>H NMR (400 MHz, CDCl<sub>3</sub>) δ 7.66 (s, 1H), 7.58-7.53 (m, 2H), 7.37-7.32 (m, 3H), 6.99 (s, 1H), 3.87 (s, 3H), 2.77 (s, 3H), 2.23 (s, 3H). <sup>13</sup>C NMR (101 MHz, CDCl<sub>3</sub>) δ 198.2, 159.9, 132.4, 131.7, 131.3, 128.5, 128.3, 127.4, 122.9, 121.4, 114.3, 94.2, 89.3, 55.4, 29.7, 16.0. HRMS (EI) m/z: [M]<sup>+</sup> calcd for C<sub>18</sub>H<sub>16</sub>O<sub>2</sub> 264.1150; found 264.1153.

### 1-(4-methoxy-5-methyl-2-(phenylethynyl)phenyl)propan-1-one (4b)

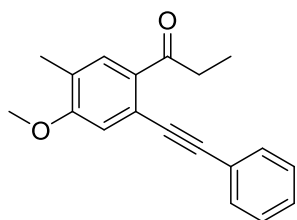

The title compound was prepared according to the general procedure and purified by column chromatography on silica gel and eluted with petroleum ether/ ethyl acetate (20/1) to afford a white powder in 88% yield (489.3 mg). <sup>1</sup>H NMR (400 MHz, CDCl<sub>3</sub>) δ 7.62 (s, 1H), 7.58-7.54 (m, 2H), 7.38-7.34 (m, 3H), 7.00 (s, 1H), 3.88 (s, 3H), 3.18 (q, *J* = 7.3 Hz, 2H), 2.24 (s, 3H), 1.23 (t, *J* = 7.3 Hz, 3H). <sup>13</sup>C NMR (101 MHz, CDCl<sub>3</sub>) δ 202.0, 159.7, 132.6, 131.5, 131.4, 128.5, 128.4, 127.6, 123.0, 120.9, 114.4, 93.7, 89.2, 55.5, 34.7, 16.1, 8.7. HRMS (EI) m/z: [M]<sup>+</sup> calcd for C<sub>19</sub>H<sub>18</sub>O<sub>2</sub> 278.1307; found 278.1304.

### 1-(3-(phenylethynyl)pyridin-2-yl)ethan-1-one (5b)

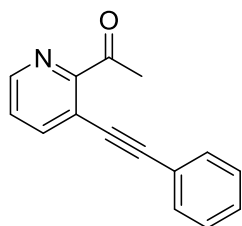

The title compound was prepared according to the general procedure and purified by column chromatography on silica gel and eluted with petroleum ether/ ethyl acetate (20/1) to afford a white powder in 85% yield (375.7 mg). <sup>1</sup>H NMR (400 MHz, CDCl<sub>3</sub>) δ 8.58 (s, 1H), 7.94 (d, *J* = 7.8 Hz, 1H), 7.61 (s, 2H), 7.46-7.32 (m, 4H), 2.74 (s, 3H). <sup>13</sup>C NMR (101 MHz, CDCl<sub>3</sub>) δ 199.1, 154.3, 147.2, 141.6, 131.9, 128.9, 128.3, 125.3, 122.7, 118.5, 96.4, 86.1, 27.4. HRMS (EI) m/z: [M]<sup>+</sup> calcd for C<sub>15</sub>H<sub>11</sub>NO 221.0841; found 221.0839.

### 1-(3-(phenylethynyl)furan-2-yl)ethan-1-one (6b)

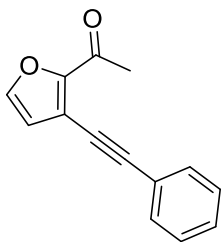

The title compound was prepared according to the general procedure and purified by column chromatography on silica gel and eluted with petroleum ether/ ethyl acetate (20/1) to afford a white powder in 84% yield (353.0 mg). <sup>1</sup>H NMR (400 MHz, CDCl<sub>3</sub>) δ 7.54 (s, 3H), 7.38 (s, 3H), 6.64 (s, 1H), 2.66 (s, 3H). <sup>13</sup>C NMR (101 MHz, CDCl<sub>3</sub>) δ 185.8, 152.6, 145.5, 131.6, 129.1, 128.4, 122.3, 115.5, 114.4, 97.6, 80.8, 27.5. HRMS (EI) m/z: [M]<sup>+</sup> calcd for C<sub>14</sub>H<sub>10</sub>O<sub>2</sub> 210.0681; found 210.0684.

#### 1-(3-(pyridin-3-ylethynyl)thiophen-2-yl)ethan-1-one (7b)

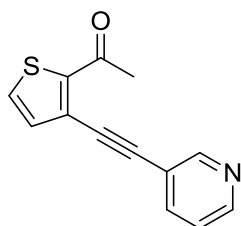

The title compound was prepared according to the general procedure and purified by column chromatography on silica gel and eluted with petroleum ether/ ethyl acetate (20/1) to afford a white powder in 75% yield (340.5 mg). <sup>1</sup>H NMR (400 MHz, CDCl<sub>3</sub>) δ 8.76 (s, 1H), 8.58 (s, 1H), 7.81 (d, *J* = 7.8 Hz, 1H), 7.57–7.53 (m, 1H), 7.33–7.28 (m, 1H), 7.27–7.22 (m, 1H), 2.78 (s, 3H). <sup>13</sup>C NMR (101 MHz, CDCl<sub>3</sub>) δ 190.4, 151.9, 149.2, 145.9, 138.2, 132.7, 131.8, 124.3, 123.1, 119.6, 92.7, 87.5, 28.8. HRMS (EI) m/z: [M]<sup>+</sup> calcd for C<sub>13</sub>H<sub>9</sub>NOS 227.0405; found 227.0406.



## 9. Characterization Data for the Products

### 1-(3-phenylnaphthalen-1-yl)-2-(p-tolyl)-1H-indole (1c)

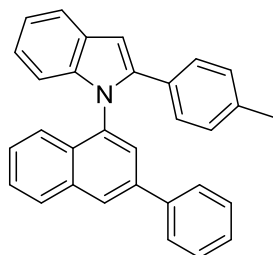

The title compound was prepared according to the general procedure and purified by column chromatography on silica gel and eluted with petroleum ether/dichloromethane (10/1) to afford a white powder in 94% yield (76.9 mg). mp 192–193 °C. <sup>1</sup>H NMR (400 MHz, CDCl<sub>3</sub>) δ 8.19 (s, 1H), 8.04 (d, *J* = 8.2 Hz, 1H), 7.83 (d, *J* = 7.8 Hz, 1H), 7.75–7.71 (m, 1H), 7.68 (d, *J* = 7.5 Hz, 2H), 7.57 (t, *J* = 7.5 Hz, 1H), 7.51 (t, *J* = 7.9 Hz, 3H), 7.42 (t, *J* = 7.4 Hz, 2H), 7.30–7.21 (m, 3H), 7.16 (t, *J* = 7.6 Hz, 1H), 7.01–6.94 (m, 4H), 2.26 (s, 3H). <sup>13</sup>C NMR (101 MHz, CDCl<sub>3</sub>) δ 142.2, 140.1, 139.9, 138.2, 137.1, 135.9, 134.5, 130.4, 129.5, 128.9, 128.8, 128.5, 128.3, 128.0, 127.6, 127.2, 127.0, 126.9, 126.7, 126.0, 123.5, 122.0, 120.5, 120.3, 111.1, 102.8, 21.0. HRMS (EI) *m/z*: [M]<sup>+</sup> calcd for C<sub>31</sub>H<sub>23</sub>N 409.1830; found 409.1828.

### 2-phenyl-1-(3-phenylnaphthalen-1-yl)-1H-indole (2c)

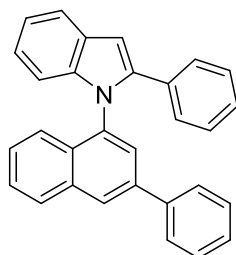

The title compound was prepared according to the general procedure and purified by column chromatography on silica gel and eluted with petroleum ether/dichloromethane (10/1) to afford a white powder in 95% yield (75.0 mg) mp 187–188 °C. <sup>1</sup>H NMR (400 MHz, CDCl<sub>3</sub>) δ 8.13 (s, 1H), 7.99 (d, *J* = 8.2 Hz, 1H), 7.78 (d, *J* = 7.8 Hz, 1H), 7.67–7.65 (m, 1H), 7.62–7.58 (m, 2H), 7.56–7.41 (m, 5H), 7.41–7.34 (m, 2H), 7.32–7.28 (m, 2H), 7.21 (t, *J* = 7.4 Hz, 1H), 7.15–7.11 (m, 3H), 6.98 (s, 1H), 6.93 (d, *J* = 8.2 Hz, 1H). <sup>13</sup>C NMR δ (101 MHz, CDCl<sub>3</sub>) 142.1, 140.2, 139.9, 138.3, 135.8, 134.6, 132.5, 130.4, 128.9, 128.6, 128.3, 128.2, 128.1, 127.7, 127.4, 127.2, 127.0, 126.9, 126.8, 126.1, 123.5, 122.3, 120.7, 120.5, 111.2, 103.3. HRMS (EI) *m/z*: [M]<sup>+</sup> calcd for C<sub>30</sub>H<sub>21</sub>N 395.1674; found 395.1680.

### 1-(3-phenylnaphthalen-1-yl)-2-(m-tolyl)-1H-indole (3c)

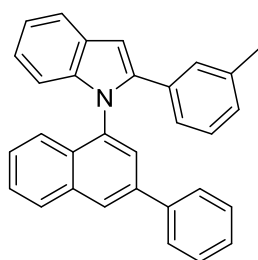

The title compound was prepared according to the general procedure and purified by column chromatography on silica gel and eluted with petroleum ether/dichloromethane (10/1) to afford a white powder in 81% yield (66.3 mg). mp 174–175 °C. <sup>1</sup>H NMR (400 MHz, CDCl<sub>3</sub>) δ 8.13 (s, 1H), 7.99 (d, *J* = 7.8 Hz, 1H), 7.77 (d, *J* = 7.7 Hz, 1H), 7.67 (s, 1H), 7.62 (d, *J* = 7.5 Hz, 2H), 7.52 (t, *J* = 7.3 Hz, 1H),

7.49–7.42 (m, 3H), 7.41–7.34 (m, 2H), 7.24–7.17 (m, 2H), 7.11 (t,  $J = 7.3$  Hz, 1H), 7.02–6.89 (m, 5H), 2.18 (s, 3H).  
 $^{13}\text{C}$  NMR (101 MHz,  $\text{CDCl}_3$ )  $\delta$  142.3, 140.1, 139.9, 138.2, 137.6, 135.9, 134.5, 132.3, 130.4, 129.0, 128.9, 128.5, 128.2, 128.1, 127.9, 127.6, 127.2, 126.9, 126.9, 126.7, 126.1, 125.1, 123.5, 122.2, 120.6, 120.4, 111.1, 103.1, 21.3.  
HRMS (EI)  $m/z$ :  $[\text{M}]^+$  calcd for  $\text{C}_{31}\text{H}_{23}\text{N}$  409.1830; found 409.1832.

#### 1-(3-phenylnaphthalen-1-yl)-2-(*o*-tolyl)-1H-indole (4c)

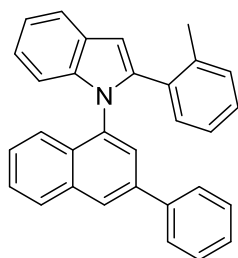

The title compound was prepared according to the general procedure and purified by column chromatography on silica gel and eluted with petroleum ether/dichloromethane (10/1) to afford a white powder in 68% yield (55.6 mg). mp 162–163 °C.  $^1\text{H}$  NMR (400 MHz,  $\text{CDCl}_3$ )  $\delta$  8.04 (s, 1H), 7.95 (d,  $J = 8.2$  Hz, 1H), 7.83 (d,  $J = 7.9$  Hz, 1H), 7.58–7.50 (m, 5H), 7.50–7.38 (m, 4H), 7.30–7.23 (m, 2H), 7.21–7.09 (m, 3H), 7.03–6.95 (m, 2H), 6.86 (s, 1H), 2.33 (s, 3H).  $^{13}\text{C}$  NMR (101 MHz,  $\text{CDCl}_3$ )  $\delta$  141.1, 140.0, 138.9, 138.0, 137.4, 135.2, 134.4, 132.2, 131.1, 130.0, 129.9, 128.8, 128.5, 128.1, 128.0, 127.5, 127.1, 126.7, 126.5, 125.9, 124.9, 123.7, 122.0, 120.4, 120.4, 111.3, 104.5, 20.6. HRMS (EI)  $m/z$ :  $[\text{M}]^+$  calcd for  $\text{C}_{31}\text{H}_{23}\text{N}$  409.1830; found 409.1824.

#### 2-(4-pentylphenyl)-1-(3-phenylnaphthalen-1-yl)-1H-indole (5c)

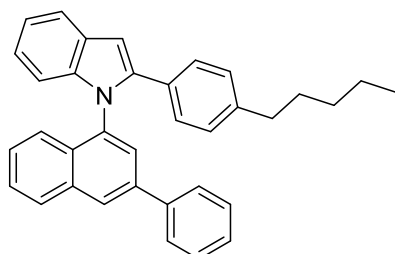

The title compound was prepared according to the general procedure and purified by column chromatography on silica gel and eluted with petroleum ether/dichloromethane (10/1) to afford a white powder in 85% yield (79.1 mg). mp 156–157 °C.  $^1\text{H}$  NMR (400 MHz,  $\text{CDCl}_3$ )  $\delta$  8.13 (s, 1H), 8.00 (d,  $J = 8.2$  Hz, 1H), 7.77 (d,  $J = 7.8$  Hz, 1H), 7.64–7.62 (m, 1H), 7.60–7.57 (m, 2H), 7.56–7.47 (m, 2H), 7.47–7.41 (m, 2H), 7.42–7.34 (m, 2H), 7.23–7.17 (m, 3H), 7.13–7.08 (m, 1H), 6.97–6.88 (m, 4H), 2.58–2.40 (m, 2H), 1.59–1.44 (m, 2H), 1.33–1.14 (m, 4H), 0.84 (t,  $J = 7.0$  Hz, 3H).  $^{13}\text{C}$  NMR (101 MHz,  $\text{CDCl}_3$ )  $\delta$  142.3, 142.1, 140.1, 139.9, 138.3, 135.9, 134.5, 130.4, 129.7, 128.8, 128.5, 128.3, 128.2, 128.0, 127.6, 127.2, 126.9, 126.9, 126.8, 126.0, 123.6, 122.0, 120.5, 120.3, 111.1, 102.8, 35.4, 31.3, 30.8, 22.4, 13.9.  
HRMS (EI)  $m/z$ :  $[\text{M}]^+$  calcd for  $\text{C}_{35}\text{H}_{31}\text{N}$  465.2457; found 465.2461.

### 2-(4-(tert-butyl)phenyl)-1-(3-phenylnaphthalen-1-yl)-1H-indole (6c)

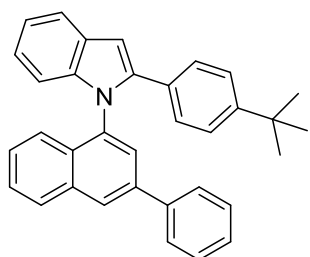

The title compound was prepared according to the general procedure and purified by column chromatography on silica gel and eluted with petroleum ether/dichloromethane (10/1) to afford a white powder in 84% yield (75.8 mg). mp 202–203 °C. <sup>1</sup>H NMR (400 MHz, CDCl<sub>3</sub>) δ 8.12 (s, 1H), 8.00 (d, *J* = 8.2 Hz, 1H), 7.75 (d, *J* = 7.8 Hz, 1H), 7.59–7.57 (m, 1H), 7.57–7.49 (m, 4H), 7.45–7.34 (m, 4H), 7.22–7.12 (m, 5H), 7.08 (t, *J* = 7.4 Hz, 1H), 6.95 (s, 1H), 6.86 (d, *J* = 8.2 Hz, 1H), 1.21 (s, 9H). <sup>13</sup>C NMR (101 MHz, CDCl<sub>3</sub>) δ 150.3, 142.1, 140.1, 140.0, 138.4, 135.9, 134.6, 130.4, 129.5, 128.9, 128.5, 128.3, 127.8, 127.6, 127.2, 127.0, 126.9, 126.9, 126.1, 125.1, 123.7, 122.1, 120.6, 120.3, 111.2, 102.9, 34.4, 31.1. HRMS (EI) *m/z*: [M]<sup>+</sup> calcd for C<sub>34</sub>H<sub>29</sub>N 451.2300; found 451.2298.

### 2-(4-fluorophenyl)-1-(3-phenylnaphthalen-1-yl)-1H-indole (7c)

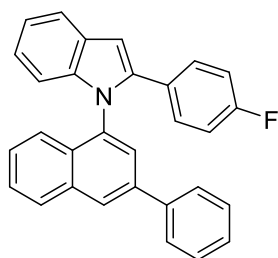

The title compound was prepared according to the general procedure and purified by column chromatography on silica gel and eluted with petroleum ether/dichloromethane (10/1) to afford a white powder in 81% yield (66.9 mg). mp 210–211 °C. <sup>1</sup>H NMR (400 MHz, CDCl<sub>3</sub>) δ 8.13 (s, 1H), 7.99 (d, *J* = 8.2 Hz, 1H), 7.78 (d, *J* = 7.8 Hz, 1H), 7.67–7.65 (m, 1H), 7.62–7.58 (m, 2H), 7.53 (t, *J* = 7.5 Hz, 1H), 7.50–7.42 (m, 3H), 7.41–7.34 (m, 2H), 7.32–7.28 (m, 2H), 7.21 (t, *J* = 7.4 Hz, 1H), 7.15–7.10 (m, 3H), 6.98 (s, 1H), 6.93 (d, *J* = 8.2 Hz, 1H). <sup>13</sup>C NMR (101 MHz, CDCl<sub>3</sub>) δ 162.1 (d, *J* = 247.5 Hz), 141.0, 140.1, 139.8, 138.3, 135.6, 134.6, 130.3, 129.8 (d, *J* = 8.1 Hz), 128.9, 128.6 (d, *J* = 3.4 Hz), 128.6, 128.1, 127.7, 127.2, 127.1, 127.0, 126.7, 126.2, 123.3, 122.4, 120.6 (d, *J* = 28.6 Hz), 115.3, 115.1, 111.2, 103.2. <sup>19</sup>F NMR (376 MHz, CDCl<sub>3</sub>): δ -114.2 (s, 1F). HRMS (EI) *m/z*: [M]<sup>+</sup> calcd for C<sub>30</sub>H<sub>20</sub>FN 413.1580; found 413.1577.

### 2-(4-chlorophenyl)-1-(3-phenylnaphthalen-1-yl)-1H-indole (8c)

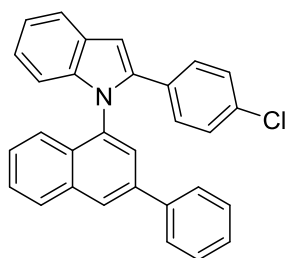

The title compound was prepared according to the general procedure and purified by column chromatography on silica gel and eluted with petroleum ether/dichloromethane (10/1) to afford a white powder in 86% yield (73.8 mg). mp 210–211 °C. <sup>1</sup>H NMR (400 MHz, CDCl<sub>3</sub>) δ 8.15 (s, 1H), 8.00 (d, *J* = 8.2 Hz, 1H), 7.77 (d, *J* = 7.8 Hz, 1H), 7.67–7.65 (m, 1H), 7.63 (d, *J* = 8.1 Hz, 2H), 7.54 (t, *J* = 7.3 Hz, 1H), 7.46 (t, *J* = 7.5 Hz, 2H), 7.43–7.34 (m, 3H), 7.24–7.18 (m, 3H), 7.15–7.05 (m, 3H), 6.96 (s, 1H), 6.92

(d,  $J = 8.2$  Hz, 1H).  $^{13}\text{C}$  NMR (101 MHz,  $\text{CDCl}_3$ )  $\delta$  140.7, 140.3, 139.7, 138.3, 135.5, 134.6, 133.3, 130.9, 130.3, 129.2, 128.9, 128.6, 128.4, 128.1, 127.8, 127.2, 127.1, 127.0, 126.6, 126.3, 123.2, 122.6, 120.8, 120.5, 111.2, 103.5. HRMS (EI)  $m/z$ :  $[\text{M}]^+$  calcd for  $\text{C}_{30}\text{H}_{20}\text{ClN}$  429.1284; found 429.1280.

### 2-(3-chlorophenyl)-1-(3-phenylnaphthalen-1-yl)-1H-indole (9c)

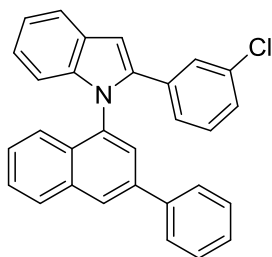

The title compound was prepared according to the general procedure and purified by column chromatography on silica gel and eluted with petroleum ether/dichloromethane (10/1) to afford a white powder in 77% yield (66.1 mg). mp 159–160 °C.  $^1\text{H}$  NMR (400 MHz,  $\text{CDCl}_3$ )  $\delta$  8.16 (s, 1H), 8.00 (d,  $J = 8.3$  Hz, 1H), 7.78 (d,  $J = 7.8$  Hz, 1H), 7.70–7.68(m, 1H), 7.66–7.62 (m, 2H), 7.56–7.51 (m, 1H), 7.50–7.43 (m, 3H), 7.42–7.36 (m, 3H) 7.25–7.20 (m, 1H), 7.17–7.11 (m, 1H), 7.10–7.07 (m, 1H), 7.05–7.02 (m, 1H), 7.00–6.97 (m, 2H), 6.94 (d,  $J = 8.4$  Hz, 1H).  $^{13}\text{C}$  NMR (101 MHz,  $\text{CDCl}_3$ )  $\delta$  140.4, 140.3, 139.8, 138.3, 135.4, 134.6, 134.2, 134.0, 130.2, 129.3, 128.9, 128.6, 128.2, 128.0, 127.7, 127.3, 127.2, 127.2, 127.0, 126.7, 126.4, 125.9, 123.2, 122.7, 120.8, 120.7, 111.2, 103.9. HRMS (EI)  $m/z$ :  $[\text{M}]^+$  calcd for  $\text{C}_{30}\text{H}_{20}\text{ClN}$  429.1284; found 429.1288.

### 2-(2-chlorophenyl)-1-(3-phenylnaphthalen-1-yl)-1H-indole (10c)

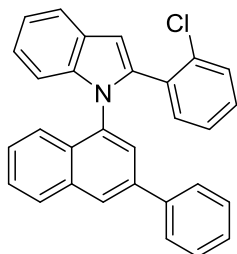

The title compound was prepared according to the general procedure and purified by column chromatography on silica gel and eluted with petroleum ether/dichloromethane (10/1) to afford a white powder in 72% yield (61.8 mg). mp 166–167 °C.  $^1\text{H}$  NMR (400 MHz,  $\text{CDCl}_3$ )  $\delta$  8.04 (s, 1H), 7.92 (d,  $J = 8.6$  Hz, 1H), 7.81 (d,  $J = 7.8$  Hz, 1H), 7.73–7.69 (m, 1H), 7.58 (d,  $J = 7.8$  Hz, 2H), 7.53–7.43 (m, 4H), 7.41–7.35 (m, 2H), 7.31 (d,  $J = 8.0$  Hz, 1H), 7.27–7.20 (m, 2H), 7.15 (t,  $J = 7.6$  Hz, 1H), 7.11–7.04 (m, 1H), 7.01–6.94 (m, 3H).  $^{13}\text{C}$  NMR (101 MHz,  $\text{CDCl}_3$ )  $\delta$  139.9, 139.0, 138.4, 137.9, 135.0, 134.4, 134.3, 132.3, 131.8, 130.1, 129.6, 129.2, 128.9, 128.4, 127.8, 127.6, 127.1, 126.7, 126.6, 126.5, 126.0, 125.9, 123.7, 122.4, 120.7, 120.6, 111.2, 105.4. HRMS (EI)  $m/z$ :  $[\text{M}]^+$  calcd for  $\text{C}_{30}\text{H}_{20}\text{ClN}$  429.1284; found 429.1281.

### 1-(4-bromophenyl)-1-(3-phenylnaphthalen-1-yl)-1H-indole (11c)

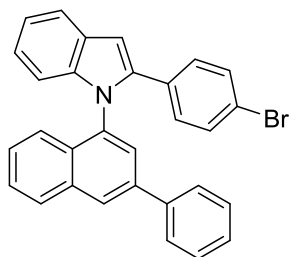

The title compound was prepared according to the general procedure and purified by column chromatography on silica gel and eluted with petroleum ether/dichloromethane (10/1) to afford a white powder in 79% yield (74.7 mg). mp 234–235 °C. <sup>1</sup>H NMR (400 MHz, CDCl<sub>3</sub>) δ 8.16 (s, 1H), 8.00 (d, *J* = 8.2 Hz, 1H), 7.77 (d, *J* = 7.7 Hz, 1H), 7.67–7.65 (m, 1H), 7.63 (d, *J* = 7.8 Hz, 2H), 7.58–7.51 (m, 1H), 7.50–7.44 (m, 2H), 7.43–7.35 (m, 3H), 7.28–7.18 (m, 3H), 7.17–7.08 (m, 3H), 6.96 (s, 1H), 6.92 (d, *J* = 8.2 Hz, 1H). <sup>13</sup>C NMR (101 MHz, CDCl<sub>3</sub>) δ 140.8, 140.3, 139.7, 138.3, 135.5, 134.6, 131.4, 131.3, 130.3, 129.5, 128.9, 128.6, 128.1, 127.8, 127.2, 127.2, 127.1, 126.6, 126.3, 123.2, 122.5, 121.5, 120.8, 120.6, 111.2, 103.6. HRMS (EI) *m/z*: [M]<sup>+</sup> calcd for C<sub>30</sub>H<sub>20</sub>BrN 473.0799; found 473.0795.

### 2-(4-iodophenyl)-1-(3-phenylnaphthalen-1-yl)-1H-indole (12c)

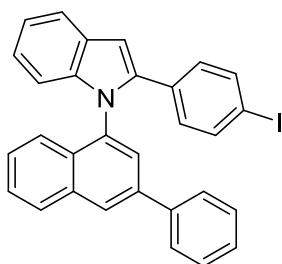

The title compound was prepared according to the general procedure and purified by column chromatography on silica gel and eluted with petroleum ether/dichloromethane (10/1) to afford a white powder in 79% yield (82.3 mg). mp 244–245 °C. <sup>1</sup>H NMR (400 MHz, CDCl<sub>3</sub>) δ 8.15 (s, 1H), 7.99 (d, *J* = 8.3 Hz, 1H), 7.75 (d, *J* = 7.7 Hz, 1H), 7.67–7.58 (m, 3H), 7.53 (t, *J* = 6.8 Hz, 1H), 7.49–7.41 (m, 4H), 7.41–7.33 (m, 3H), 7.20 (t, *J* = 7.3 Hz, 1H), 7.11 (t, *J* = 7.5 Hz, 1H), 7.01 (d, *J* = 7.7 Hz, 2H), 6.96 (s, 1H), 6.90 (d, *J* = 8.0 Hz, 1H). <sup>13</sup>C NMR (101 MHz, CDCl<sub>3</sub>) δ 140.8, 140.3, 139.7, 138.3, 137.3, 135.5, 134.6, 132.0, 130.3, 129.6, 128.9, 128.6, 128.1, 127.8, 127.2, 127.2, 127.1, 126.6, 126.3, 123.2, 122.6, 120.8, 120.6, 111.2, 103.6, 93.2. HRMS (EI) *m/z*: [M]<sup>+</sup> calcd for C<sub>30</sub>H<sub>20</sub>I 521.0640; found 521.0642.

### 2-(4-methoxyphenyl)-1-(3-phenylnaphthalen-1-yl)-1H-indole (13c)

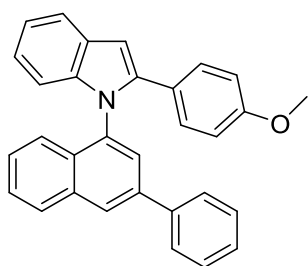

The title compound was prepared according to the general procedure and purified by column chromatography on silica gel and eluted with petroleum ether/dichloromethane (10/1) to afford a white powder in 88% yield (74.8 mg). mp 205–206 °C. <sup>1</sup>H NMR (400 MHz, CDCl<sub>3</sub>) δ 8.13 (s, 1H), 7.98 (d, *J* = 8.2 Hz, 1H), 7.74 (d, *J* = 7.8 Hz, 1H), 7.67–7.65 (m, 1H), 7.62 (d, *J* = 7.7 Hz, 2H), 7.52 (t, *J* = 7.4 Hz, 1H), 7.47–7.41 (m, 3H), 7.39–7.33 (m, 2H), 7.22–7.15 (m, 3H), 7.08 (t, *J* = 7.7 Hz, 1H), 6.90–6.85 (m, 2H), 6.65 (d, *J* = 8.7 Hz, 2H), 3.68 (s, 3H). <sup>13</sup>C NMR (101 MHz, CDCl<sub>3</sub>) δ 158.9, 142.0, 140.0, 139.9, 138.3,

135.9, 134.5, 130.4, 129.4, 128.9, 128.5, 128.3, 127.7, 127.2, 127.0, 126.9, 126.7, 126.1, 125.0, 123.5, 121.9, 120.58, 120.2, 113.6, 111.0, 102.3, 55.1. HRMS (EI)  $m/z$ :  $[M]^+$  calcd for  $C_{31}H_{23}NO$  425.1780; found 425.1782.

#### 2-(4-nitrophenyl)-1-(3-phenylnaphthalen-1-yl)-1H-indole (14c)

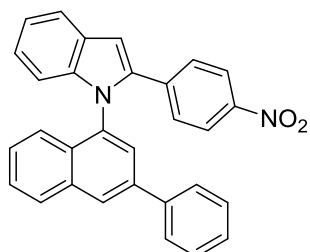

The title compound was prepared according to the general procedure and purified by column chromatography on silica gel and eluted with petroleum ether/dichloromethane (10/1) to afford a yellow powder in 68% yield (59.8 mg). mp 244–245 °C.  $^1H$  NMR (400 MHz,  $CDCl_3$ )  $\delta$  8.22 (s, 1H), 8.05 (d,  $J = 8.2$  Hz, 1H), 7.99 (d,  $J = 8.6$  Hz, 2H), 7.83 (d,  $J = 7.7$  Hz, 1H), 7.73–7.70 (m, 1H), 7.66 (d,  $J = 7.4$  Hz, 2H), 7.62–7.55 (m, 1H), 7.52–7.38 (m, 7H), 7.32–7.24 (m, 1H), 7.24–7.14 (m, 2H), 6.99 (d,  $J = 8.1$  Hz, 1H).  $^{13}C$  NMR (101 MHz,  $CDCl_3$ )  $\delta$  146.4, 140.9, 139.5, 139.2, 138.8, 138.4, 135.2, 134.7, 130.1, 129.0, 128.8, 128.1, 127.9, 127.8, 127.4, 127.3, 127.1, 126.6, 126.5, 123.7, 123.5, 122.9, 121.3, 121.1, 111.4, 105.8. HRMS (EI)  $m/z$ :  $[M]^+$  calcd for  $C_{30}H_{20}N_2O_2$  440.1525; found 440.1527.

#### 2-(1-(3-phenylnaphthalen-1-yl)-1H-indol-2-yl)benzonitrile (15c)

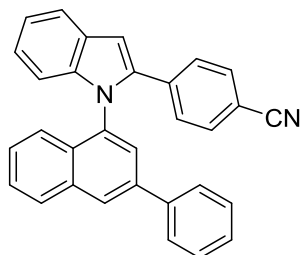

The title compound was prepared according to the general procedure and purified by column chromatography on silica gel and eluted with petroleum ether/dichloromethane (10/1) to afford a pale yellow powder in 76% yield (63.8 mg). mp 222–223 °C.  $^1H$  NMR (400 MHz,  $CDCl_3$ )  $\delta$  8.18 (s, 1H), 8.02 (d,  $J = 8.2$  Hz, 1H), 7.79 (d,  $J = 7.8$  Hz, 1H), 7.66 (s, 1H), 7.62 (d,  $J = 7.9$  Hz, 2H), 7.56 (t,  $J = 7.2$  Hz, 1H), 7.47 (t,  $J = 7.4$  Hz, 2H), 7.44–7.33 (m, 7H), 7.23 (d,  $J = 7.7$  Hz, 1H), 7.16 (t,  $J = 7.6$  Hz, 1H), 7.08 (s, 1H), 6.95 (d,  $J = 8.2$  Hz, 1H).  $^{13}C$  NMR (101 MHz,  $CDCl_3$ )  $\delta$  140.7, 139.6, 139.5, 138.4, 136.8, 135.2, 134.6, 131.9, 130.0, 129.0, 128.7, 128.1, 127.9, 127.3, 127.2, 127.1, 126.5, 126.5, 123.4, 123.0, 121.1, 121.0, 118.6, 111.3, 110.5, 105.3. HRMS (EI)  $m/z$ :  $[M]^+$  calcd for  $C_{31}H_{20}N_2$  420.1626; found 420.1624.

### 1-(4-(1-(3-phenylnaphthalen-1-yl)-1H-indol-2-yl)phenyl)ethan-1-one (16c)

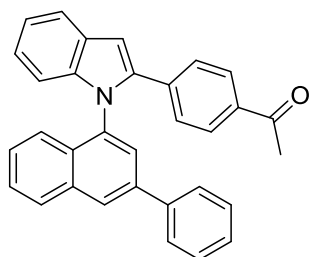

The title compound was prepared according to the general procedure and purified by column chromatography on silica gel and eluted with petroleum ether/dichloromethane (10/1) to afford a pale yellow powder in 75% yield (65.6 mg). mp 189–190 °C. <sup>1</sup>H NMR (400 MHz, CDCl<sub>3</sub>) δ 8.16 (s, 1H), 8.00 (d, *J* = 8.2 Hz, 1H), 7.79 (d, *J* = 7.8 Hz, 1H), 7.72–7.66 (m, 3H), 7.62 (d, *J* = 7.4 Hz, 2H), 7.54 (t, *J* = 7.4 Hz, 1H), 7.45 (t, *J* = 7.7 Hz, 3H), 7.41–7.34 (m, 4H), 7.22 (t, *J* = 7.4 Hz, 1H), 7.14 (t, *J* = 7.6 Hz, 1H), 7.08 (s, 1H), 6.93 (d, *J* = 8.2 Hz, 1H), 2.47 (s, 3H). <sup>13</sup>C NMR (101 MHz, CDCl<sub>3</sub>) δ 197.4, 140.7, 140.6, 139.7, 138.4, 137.0, 135.6, 135.5, 134.6, 130.2, 129.0, 128.7, 128.3, 128.0, 127.8, 127.3, 127.2, 127.1, 126.6, 126.4, 123.2, 123.1, 121.0, 120.8, 111.3, 104.8, 26.4. HRMS (EI) *m/z*: [M]<sup>+</sup> calcd for C<sub>32</sub>H<sub>23</sub>NO 437.1780; found 437.1785.

### 2-(4-(phenylethynyl)phenyl)-1-(3-phenylnaphthalen-1-yl)-1H-indole (17c)

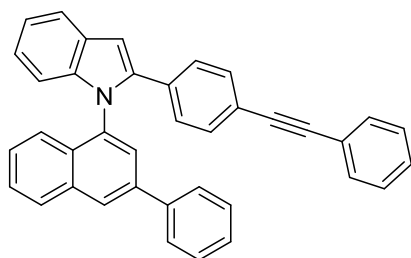

The title compound was prepared according to the general procedure and purified by column chromatography on silica gel and eluted with petroleum ether/dichloromethane (10/1) to afford a white powder in 80% yield (79.2 mg). mp 199–200 °C. <sup>1</sup>H NMR (400 MHz, CDCl<sub>3</sub>) δ 8.13 (s, 1H), 7.97 (d, *J* = 8.2 Hz, 1H), 7.76 (d, *J* = 7.8 Hz, 1H), 7.67 (s, 1H), 7.61 (d, *J* = 7.5 Hz, 2H), 7.50 (t, *J* = 7.4 Hz, 1H), 7.47–7.40 (m, 5H), 7.35 (t, *J* = 7.3 Hz, 2H), 7.32–7.24 (m, 7H), 7.23–7.17 (m, 1H), 7.11 (t, *J* = 7.5 Hz, 1H), 7.00 (s, 1H), 6.92 (d, *J* = 8.2 Hz, 1H). <sup>13</sup>C NMR (101 MHz, CDCl<sub>3</sub>) δ 141.3, 140.4, 139.7, 138.4, 135.7, 134.6, 132.3, 131.5, 131.4, 130.2, 128.9, 128.6, 128.2, 128.2, 127.8, 127.7, 127.2, 127.1, 127.0, 126.6, 126.2, 123.3, 123.1, 122.6, 122.0, 120.8, 120.6, 111.2, 103.8, 90.2, 89.1. HRMS (EI) *m/z*: [M]<sup>+</sup> calcd for C<sub>38</sub>H<sub>25</sub>N 495.1987; found 495.1979.

### 2-octyl-1-(3-phenylnaphthalen-1-yl)-1H-indole (18c)

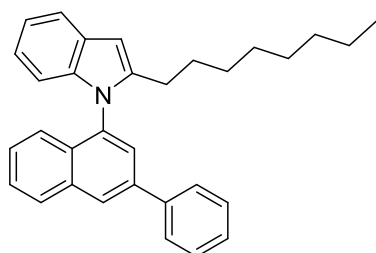

The title compound was prepared according to the general procedure and purified by column chromatography on silica gel and eluted with petroleum ether/dichloromethane (10/1) to afford a sticky pale yellow liquid in 92% yield (79.3 mg). <sup>1</sup>H NMR (400 MHz, CDCl<sub>3</sub>) δ 8.26 (s, 1H), 8.06 (d, *J* = 8.2 Hz, 1H), 7.86 (s, 1H), 7.80 (d, *J* = 7.6 Hz, 2H), 7.72 (d, *J* = 7.8 Hz, 1H), 7.61–7.50 (m, 3H), 7.48–7.35 (m, 2H), 7.19 (t, *J* = 9.5 Hz, 2H), 7.07 (t, *J* = 7.5 Hz, 1H), 6.88 (d, *J* =

8.1 Hz, 1H), 6.60 (s, 1H), 2.55 (t,  $J = 7.5$  Hz, 2H), 1.66–1.55 (m, 2H), 1.32–1.02 (m, 10H), 0.87 (t,  $J = 6.9$  Hz, 3H).  $^{13}\text{C}$  NMR (101 MHz,  $\text{CDCl}_3$ )  $\delta$  143.0, 139.8, 139.0, 138.4, 135.1, 134.6, 130.6, 129.0, 128.5, 128.1, 127.7, 127.2, 127.0, 127.0, 126.5, 126.4, 123.2, 121.0, 119.9, 119.6, 110.2, 100.0, 31.7, 29.2, 29.0, 29.0, 28.5, 26.9, 22.5, 14.0. HRMS (EI)  $m/z$ :  $[\text{M}]^+$  calcd for  $\text{C}_{32}\text{H}_{33}\text{N}$  431.2613; found 431.2611.

### 3- (tert-butyl)-1-(3-phenylnaphthalen-1-yl)-1H-indole (19c)

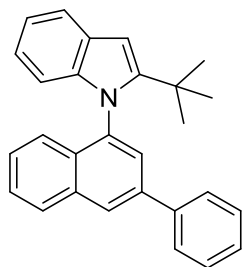

The title compound was prepared according to the general procedure and purified by column chromatography on silica gel and eluted with petroleum ether/dichloromethane (10/1) to afford a sticky pale yellow liquid in 80% yield (60.0 mg).  $^1\text{H}$  NMR (400 MHz,  $\text{CDCl}_3$ )  $\delta$  8.24 (s, 1H), 8.01 (d,  $J = 8.4$  Hz, 1H), 7.99–7.95 (m, 1H), 7.78 (d,  $J = 7.9$  Hz, 2H), 7.68 (d,  $J = 7.8$  Hz, 1H), 7.52 (t,  $J = 7.6$  Hz, 3H), 7.46–7.39 (m, 1H), 7.36–7.29 (m, 1H), 7.13 (t,  $J = 7.4$  Hz, 1H), 7.03–6.94 (m, 2H), 6.65 (s, 1H), 6.56 (d,  $J = 8.2$  Hz, 1H), 1.24 (s, 9H).  $^{13}\text{C}$  NMR (101 MHz,  $\text{CDCl}_3$ )  $\delta$  151.3, 140.8, 139.8, 138.0, 137.3, 134.4, 131.6, 129.0, 128.3, 128.2, 127.8, 127.2, 126.9, 126.9, 126.6, 123.9, 121.4, 119.9, 119.7, 110.4, 99.7, 33.4, 30.8. HRMS (EI)  $m/z$ :  $[\text{M}]^+$  calcd for  $\text{C}_{28}\text{H}_{25}\text{N}$  375.1987; found 375.1990.

### 2-cyclopropyl-1-(3-phenylnaphthalen-1-yl)-1H-indole (20c)

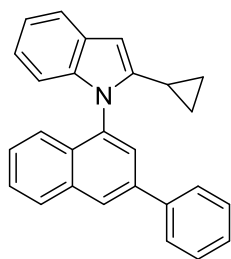

The title compound was prepared according to the general procedure and purified by column chromatography on silica gel and eluted with petroleum ether/dichloromethane (10/1) to afford a sticky pale yellow liquid in 83% yield (59.6 mg).  $^1\text{H}$  NMR (400 MHz,  $\text{CDCl}_3$ )  $\delta$  8.25 (s, 1H), 8.05 (d,  $J = 8.2$  Hz, 1H), 7.93–7.90 (m, 1H), 7.88–7.74 (m, 2H), 7.67 (d,  $J = 7.8$  Hz, 1H), 7.61–7.48 (m, 3H), 7.48–7.36 (m, 2H), 7.31–7.25 (m, 1H), 7.19–7.12 (m, 1H), 7.11–7.02 (m, 1H), 6.87 (d,  $J = 8.1$  Hz, 1H), 6.35 (s, 1H), 1.68–1.47 (m, 1H), 0.8–0.73 (m, 3H), 0.73–0.64 (m, 1H).  $^{13}\text{C}$  NMR (101 MHz,  $\text{CDCl}_3$ )  $\delta$  145.1, 139.9, 139.2, 138.4, 135.3, 134.6, 130.7, 129.0, 128.4, 127.9, 127.7, 127.2, 126.9, 126.9, 126.6, 126.3, 123.5, 121.1, 120.0, 119.7, 110.1, 96.9, 8.3, 8.1, 7.6. HRMS (EI)  $m/z$ :  $[\text{M}]^+$  calcd for  $\text{C}_{27}\text{H}_{21}\text{N}$  359.1674; found 359.1670.



#### 4-cyclohexyl-1-(3-phenylnaphthalen-1-yl)-1H-indole (21c)

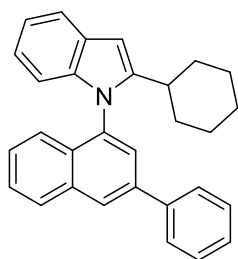

The title compound was prepared according to the general procedure and purified by column chromatography on silica gel and eluted with petroleum ether/dichloromethane (10/1) to afford a sticky pale yellow liquid in 86% yield (69.0 mg). <sup>1</sup>H NMR (400 MHz, CDCl<sub>3</sub>) δ 8.24 (s, 1H), 8.04 (d, *J* = 8.2 Hz, 1H), 7.87–7.84 (m, 1H), 7.82–7.76 (m, 2H), 7.69 (d, *J* = 7.8 Hz, 1H), 7.60–7.50 (m, 3H), 7.43 (t, *J* = 7.4 Hz, 1H), 7.37 (t, *J* = 7.6 Hz, 1H), 7.20–7.10 (m, 2H), 7.03 (t, *J* = 7.6 Hz, 1H), 6.79 (d, *J* = 8.2 Hz, 1H), 6.58 (s, 1H), 2.46–2.36 (m, 1H), 2.07–1.98 (m, 1H), 1.82–1.74 (m, 1H), 1.74–1.67 (m, 1H), 1.66–1.56 (m, 2H), 1.54–1.42 (m, 2H), 1.27–0.90 (m, 3H). <sup>13</sup>C NMR (101 MHz, CDCl<sub>3</sub>) δ 148.6, 139.9, 138.9, 138.3, 135.2, 134.6, 130.8, 129.0, 128.5, 128.1, 127.8, 127.2, 127.1, 127.0, 126.5, 126.4, 123.2, 121.0, 119.9, 119.7, 110.4, 98.2, 36.0, 34.3, 33.1, 26.3, 25.9. HRMS (EI) *m/z*: [M]<sup>+</sup> calcd for C<sub>30</sub>H<sub>27</sub>N 401.2143; found 401.2138.

#### Methyl 9-(1-(3-phenylnaphthalen-1-yl)-1H-indol-2-yl)nonanoate (22c)

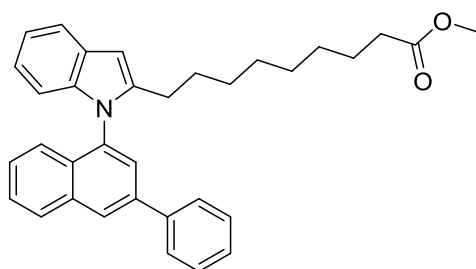

The title compound was prepared according to the general procedure and purified by column chromatography on silica gel and eluted with petroleum ether/dichloromethane (5/1) to afford a sticky pale yellow liquid in 78% yield (76.3 mg). <sup>1</sup>H NMR (400 MHz, CDCl<sub>3</sub>) δ 8.33 (s, 1H), 8.10 (d, *J* = 8.2 Hz, 1H), 7.94 (s, 1H), 7.86 (d, *J* = 7.5 Hz, 2H), 7.80 (d, *J* = 7.7 Hz, 1H), 7.65–7.54 (m, 3H), 7.52–7.40 (m, 2H), 7.32–7.21 (m, 2H), 7.13 (t, *J* = 7.5 Hz, 1H), 6.95 (d, *J* = 8.1 Hz, 1H), 6.69 (s, 1H), 3.75 (s, 3H), 2.64 (t, *J* = 7.3 Hz, 2H), 2.35 (t, *J* = 7.4 Hz, 2H), 1.72–1.58 (m, 4H), 1.40–1.18 (m, 8H). <sup>13</sup>C NMR (101 MHz, CDCl<sub>3</sub>) δ 173.9, 142.7, 139.7, 139.0, 138.2, 135.1, 134.6, 130.6, 128.9, 128.4, 128.0, 127.6, 127.1, 126.9, 126.9, 126.3, 126.2, 123.1, 121.0, 119.8, 119.6, 110.1, 100.0, 51.2, 33.8, 28.8, 28.8, 28.4, 26.8, 24.7. HRMS (EI) *m/z*: [M]<sup>+</sup> calcd for C<sub>34</sub>H<sub>35</sub>NO<sub>2</sub> 489.2688; found 489.2679.

#### 4-((1-(3-phenylnaphthalen-1-yl)-1H-indol-2-yl)methyl)morpholine (23c)

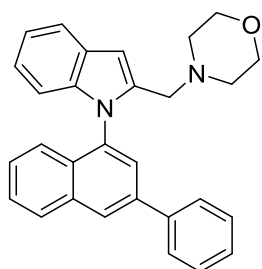

The title compound was prepared according to the general procedure and purified by column chromatography on silica gel and eluted with petroleum ether/dichloromethane (5/1) to afford a sticky pale yellow liquid in 79% yield (66.0 mg). <sup>1</sup>H NMR (400 MHz, CDCl<sub>3</sub>) δ 8.21 (s, 1H), 8.03 (d, *J* = 8.2 Hz, 1H), 7.90 (s, 1H), 7.78 (d, *J* = 7.6 Hz, 2H), 7.71 (d, *J* = 7.8 Hz, 1H), 7.60–7.47 (m, 3H), 7.42 (t, *J* = 7.3 Hz, 1H), 7.35 (t, *J* = 7.6 Hz, 1H), 7.23–7.02 (m, 3H), 6.90 (d, *J* = 8.1 Hz, 1H), 6.70 (s, 1H), 3.53–3.28 (m, 6H), 2.24 (s, 4H). <sup>13</sup>C NMR (101 MHz, CDCl<sub>3</sub>) δ 139.9, 139.4, 138.1, 137.8, 135.1, 134.5, 130.7, 129.0, 128.4, 127.8, 127.4, 127.1, 126.8, 126.8, 126.4, 126.1, 123.4, 121.9, 120.2, 120.1, 110.6, 103.2, 66.7, 54.7, 53.0. HRMS (EI) *m/z*: [M]<sup>+</sup> calcd for C<sub>29</sub>H<sub>26</sub>N<sub>2</sub>O 418.2045; found 418.2042.

#### 1-(3-phenylnaphthalen-1-yl)-2-(thiophen-3-yl)-1H-indole (24c)

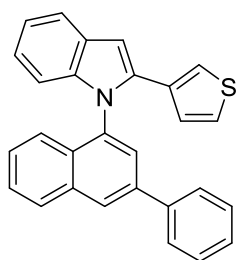

The title compound was prepared according to the general procedure and purified by column chromatography on silica gel and eluted with petroleum ether/dichloromethane (10/1) to afford a white powder in 88% yield (70.6 mg). mp 207–208 °C. <sup>1</sup>H NMR (400 MHz, CDCl<sub>3</sub>) δ 8.27 (s, 1H), 8.06 (d, *J* = 8.1 Hz, 1H), 7.86–7.76 (m, 2H), 7.73 (d, *J* = 7.8 Hz, 2H), 7.61–7.46 (m, 3H), 7.45–7.35 (m, 3H), 7.28–7.22 (m, 1H), 7.19–7.09 (m, 3H), 7.08–7.03 (m, 1H), 6.97–6.90 (m, 1H), 6.75–6.70 (m, 1H). <sup>13</sup>C NMR (101 MHz, CDCl<sub>3</sub>) δ 140.0, 139.7, 138.4, 137.0, 135.8, 134.6, 132.8, 130.5, 128.9, 128.5, 128.0, 127.7, 127.3, 127.2, 127.1, 126.8, 126.5, 125.0, 123.3, 122.3, 121.4, 120.6, 120.3, 110.8, 102.3. HRMS (EI) *m/z*: [M]<sup>+</sup> calcd for C<sub>28</sub>H<sub>19</sub>NS 401.1238; found 401.1233.

#### 1-(3-phenylnaphthalen-1-yl)-2-(pyridin-3-yl)-1H-indole (25c)

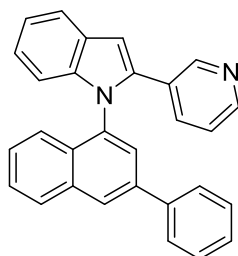

The title compound was prepared according to the general procedure and purified by column chromatography on silica gel and eluted with petroleum ether/dichloromethane (10/1) to afford a pale yellow powder in 88% yield (70.0 mg). mp 165–166 °C. <sup>1</sup>H NMR (400 MHz, CDCl<sub>3</sub>) δ 8.69 (s, 1H), 8.37 (s, 1H), 8.16 (s, 1H), 8.00 (d, *J* = 8.2 Hz, 1H), 7.81 (d, *J* = 7.8 Hz, 1H), 7.69 (s, 1H), 7.62 (d, *J* = 7.4 Hz, 2H), 7.53 (t, *J* = 7.2 Hz, 1H), 7.49–7.42 (m, 3H), 7.41–7.34 (m, 3H), 7.27–7.20 (m, 1H), 7.16 (t, *J* = 7.5 Hz, 1H), 7.05 (s, 1H), 7.04–6.98 (m, 1H), 6.96 (d, *J* = 8.1 Hz, 1H). <sup>13</sup>C NMR (101 MHz, CDCl<sub>3</sub>) δ 148.9, 148.2, 140.4, 139.6, 138.4, 138.3, 135.1, 134.7,

134.6, 130.2, 128.9, 128.6, 128.0, 127.7, 127.3, 127.1, 127.1, 126.7, 126.5, 123.0, 122.9, 120.9, 120.7, 111.2, 104.1.

HRMS (EI)  $m/z$ :  $[M]^+$  calcd for  $C_{29}H_{20}N_2$  396.1626; found 396.1628.

#### 9-phenyl-3-(1-(3-phenylnaphthalen-1-yl)-1H-indol-2-yl)-9H-carbazole (26c)

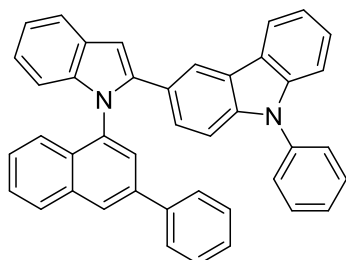

The title compound was prepared according to the general procedure and purified by column chromatography on silica gel and eluted with petroleum ether/dichloromethane (5/1) to afford a white powder in 63% yield (70.6 mg). mp 255-256 °C.  $^1H$  NMR (400 MHz,  $CDCl_3$ )  $\delta$  8.16 (s, 1H), 8.11 (s, 1H), 7.96 (d,  $J = 8.1$  Hz, 1H), 7.87 (d,  $J = 7.7$  Hz, 1H), 7.83–7.73 (m, 2H), 7.61

(d,  $J = 7.6$  Hz, 2H), 7.54–7.46 (m, 4H), 7.46–7.36 (m, 5H), 7.36–7.30 (m, 3H), 7.30–7.25 (m, 2H), 7.24–7.18 (m, 2H), 7.14–7.07 (m, 2H), 7.03 (s, 1H), 6.94 (d,  $J = 8.1$  Hz, 1H).  $^{13}C$  NMR (101 MHz,  $CDCl_3$ )  $\delta$  143.1, 141.1, 140.2, 140.1, 139.9, 138.3, 137.3, 136.2, 134.5, 130.7, 129.7, 128.8, 128.5, 128.5, 127.6, 127.4, 127.2, 127.0, 126.9, 126.9, 126.3, 126.1, 126.0, 124.5, 123.5, 123.2, 121.9, 120.5, 120.2, 120.1, 120.0, 111.1, 109.8, 109.4, 102.6. HRMS (EI)  $m/z$ :  $[M]^+$  calcd for  $C_{42}H_{28}N_2$  560.2252; found 560.2255.

#### 5-cyclohexyl-1-(3-phenylnaphthalen-1-yl)-1H-indole (27c)

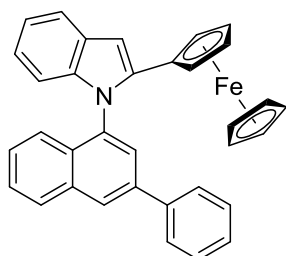

The title compound was prepared according to the general procedure and purified by column chromatography on silica gel and eluted with petroleum ether/dichloromethane (10/1) to afford a red powder in 70% yield (70.4 mg). mp 215–216 °C.  $^1H$  NMR (400 MHz,  $CDCl_3$ )  $\delta$  8.29 (s, 1H), 8.06 (d,  $J = 8.2$  Hz, 1H), 7.87 (s, 1H), 7.77 (d,  $J = 7.8$  Hz, 2H), 7.70 (d,  $J = 7.8$  Hz, 1H), 7.57 (t,  $J = 7.5$  Hz,

1H), 7.49 (t,  $J = 7.5$  Hz, 2H), 7.40 (t,  $J = 7.5$  Hz, 2H), 7.31 (d,  $J = 8.4$  Hz, 1H), 7.17 (t,  $J = 7.4$  Hz, 1H), 7.05 (t,  $J = 7.6$  Hz, 1H), 6.95 (s, 1H), 6.81 (d,  $J = 8.1$  Hz, 1H), 4.11 (s, 1H), 4.05 (s, 1H), 4.01 (s, 1H), 3.97–3.91 (m, 6H).  $^{13}C$  NMR (101 MHz,  $CDCl_3$ )  $\delta$  140.2, 140.0, 139.7, 138.3, 136.0, 134.5, 130.9, 129.0, 128.5, 128.3, 127.8, 127.2, 127.1, 127.1, 126.9, 126.5, 123.5, 121.4, 120.4, 119.5, 110.4, 100.8, 69.7, 68.4, 68.3, 67.6, 67.1. HRMS (EI)  $m/z$ :  $[M]^+$  calcd for  $C_{34}H_{25}FeN$  503.1336; found 503.1339.

### 1-(naphthalen-2-yl)-1-(3-phenylnaphthalen-1-yl)-1H-indole (28c)

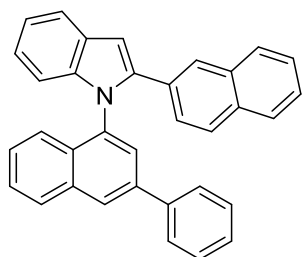

The title compound was prepared according to the general procedure and purified by column chromatography on silica gel and eluted with petroleum ether/dichloromethane (10/1) to afford a white powder in 82% yield (73.0 mg). mp 237–238 °C. <sup>1</sup>H NMR (400 MHz, CDCl<sub>3</sub>) δ 8.14 (s, 1H), 8.0–7.95 (m, 1H), 7.84–7.79 (m, 2H), 7.77–7.73 (m, 1H), 7.69–7.64 (s, 1H), 7.61–7.48 (m, 6H),

7.44–7.33 (m, 7H), 7.25–7.20 (m, 1H), 7.17–7.08 (m, 2H), 6.99–6.92 (m, 1H). <sup>13</sup>C NMR (101 MHz, CDCl<sub>3</sub>) δ 142.0, 140.4, 139.8, 138.3, 135.9, 134.6, 133.0, 132.3, 130.4, 129.9, 128.8, 128.5, 128.3, 128.0, 127.6, 127.4, 127.1, 127.1, 126.9, 126.7, 126.2, 126.0, 125.9, 125.9, 123.4, 122.4, 120.7, 120.5, 111.2, 103.8. HRMS (EI) m/z: [M]<sup>+</sup> calcd for C<sub>34</sub>H<sub>23</sub>N 445.1830; found 445.1831.

### 2-phenyl-1-(3-(p-tolyl)naphthalen-1-yl)-1H-indole (29c)

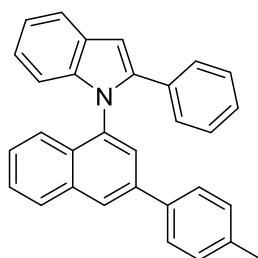

The title compound was prepared according to the general procedure and purified by column chromatography on silica gel and eluted with petroleum ether/dichloromethane (10/1) to afford a white powder in 93% yield (76.1 mg). mp 214–215 °C. <sup>1</sup>H NMR (400 MHz, CDCl<sub>3</sub>) δ 8.12 (s, 1H), 7.99 (d, *J* = 8.2 Hz, 1H), 7.79 (d, *J* = 7.8 Hz, 1H), 7.68–7.65 (m, 1H), 7.58–7.44 (m, 5H), 7.40–7.35 (m, 1H),

7.33–7.27 (m, 3H), 7.22 (t, *J* = 7.4 Hz, 1H), 7.14–7.10 (m, 4H), 6.98 (s, 1H), 6.94 (d, *J* = 8.2 Hz, 1H), 2.41 (s, 3H). <sup>13</sup>C NMR (101 MHz, CDCl<sub>3</sub>) δ 142.1, 140.1, 138.2, 137.6, 137.0, 135.7, 134.6, 132.5, 130.2, 129.6, 128.4, 128.2, 128.2, 128.1, 127.3, 127.0, 126.8, 126.8, 126.7, 125.7, 123.5, 122.2, 120.6, 120.4, 111.2, 103.2, 21.0. HRMS (EI) m/z: [M]<sup>+</sup> calcd for C<sub>31</sub>H<sub>23</sub>N 409.1830; found 409.1837.

### 2-phenyl-1-(3-(m-tolyl)naphthalen-1-yl)-1H-indole (30c)

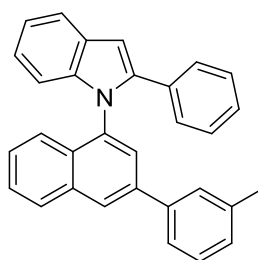

The title compound was prepared according to the general procedure and purified by column chromatography on silica gel and eluted with petroleum ether/dichloromethane (10/1) to afford a white powder in 82% yield (67.1 mg). mp 171–172 °C. <sup>1</sup>H NMR (400 MHz, CDCl<sub>3</sub>) δ 8.18 (s, 1H), 8.03 (d, *J* = 8.1 Hz, 1H), 7.84 (d, *J* = 7.8 Hz, 1H), 7.74–7.71 (m, 1H), 7.59–7.52 (m, 2H), 7.49–7.45 (m, 2H), 7.44–7.34 (m, 4H), 7.31–7.23

(m, 2H), 7.21–7.15 (m, 4H), 7.04 (s, 1H), 7.00 (d, *J* = 8.2 Hz, 1H), 2.47 (s, 3H). <sup>13</sup>C NMR (101 MHz, CDCl<sub>3</sub>) δ

142.1, 140.1, 139.8, 138.5, 138.4, 135.7, 134.5, 132.4, 130.3, 128.8, 128.5, 128.4, 128.2, 128.1, 128.1, 128.0, 127.3, 126.9, 126.8, 126.8, 126.0, 124.2, 123.4, 122.2, 120.6, 120.4, 111.2, 103.2, 21.4. HRMS (EI)  $m/z$ :  $[M]^+$  calcd for  $C_{31}H_{23}N$  409.1830; found 409.1829.

### 2-phenyl-1-(3-(*o*-tolyl)naphthalen-1-yl)-1H-indole (31c)

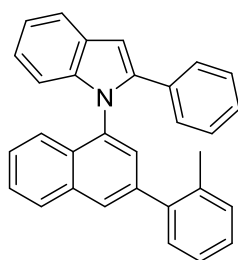

The title compound was prepared according to the general procedure and purified by column chromatography on silica gel and eluted with petroleum ether/dichloromethane (10/1) to afford a white powder in 65% yield (53.2 mg). mp 163–164 °C.  $^1H$  NMR (400 MHz,  $CDCl_3$ )  $\delta$  8.13 (s, 1H), 7.99 (d,  $J = 8.2$  Hz, 1H), 7.78 (d,  $J = 7.8$  Hz, 1H), 7.66 (s, 1H), 7.56–7.44 (m, 2H), 7.45–7.27 (m, 6H), 7.27–7.17 (m, 2H), 7.15–7.09 (m, 4H), 6.98 (s, 1H), 6.93 (d,  $J = 8.2$  Hz, 1H), 2.42 (s, 3H).  $^{13}C$  NMR (101 MHz,  $CDCl_3$ )  $\delta$  142.1, 140.2, 139.9, 138.6, 138.4, 135.7, 134.6, 132.5, 130.3, 128.8, 128.5, 128.4, 128.3, 128.2, 128.1, 128.0, 127.3, 126.9, 126.9, 126.9, 126.1, 124.3, 123.5, 122.3, 120.7, 120.5, 111.2, 103.3, 21.5. HRMS (EI)  $m/z$ :  $[M]^+$  calcd for  $C_{31}H_{23}N$  409.1830; found 409.1831.

### 1-(3-(4-pentylphenyl)naphthalen-1-yl)-2-phenyl-1H-indole (32c)

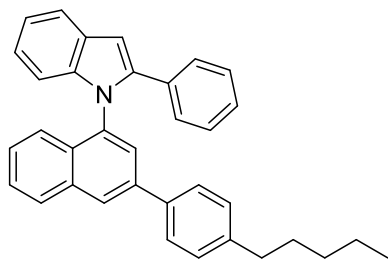

The title compound was prepared according to the general procedure and purified by column chromatography on silica gel and eluted with petroleum ether/dichloromethane (10/1) to afford a white powder in 87% yield (80.9 mg). mp 170–171 °C.  $^1H$  NMR (400 MHz,  $CDCl_3$ )  $\delta$  8.10 (s, 1H), 7.96 (d,  $J = 8.2$  Hz, 1H), 7.76 (d,  $J = 7.8$  Hz, 1H), 7.66–7.63 (m, 1H), 7.53–7.42 (m, 4H), 7.37–7.31 (m, 1H), 7.30–7.25 (m, 3H), 7.24–7.22 (m, 1H), 7.19 (t,  $J = 7.6$  Hz, 1H), 7.12–7.07 (m, 4H), 6.96 (s, 1H), 6.91 (d,  $J = 8.2$  Hz, 1H), 2.70–2.62 (t,  $J = 7.6$  Hz, 2H), 1.70–1.60 (m, 2H), 1.38–1.31 (m, 4H), 0.93 (t,  $J = 6.7$  Hz, 3H).  $^{13}C$  NMR (101 MHz,  $CDCl_3$ )  $\delta$  142.6, 142.1, 140.2, 138.2, 137.1, 135.7, 134.6, 132.5, 130.2, 129.0, 128.4, 128.2, 128.1, 128.1, 127.3, 127.0, 126.8, 126.8, 126.7, 125.7, 123.4, 122.2, 120.6, 120.4, 111.2, 103.2, 35.5, 31.4, 31.1, 22.5, 14.0. HRMS (EI)  $m/z$ :  $[M]^+$  calcd for  $C_{35}H_{31}N$  465.2457; found 465.2454.

### 1-(3-(4-(tert-butyl)phenyl)naphthalen-1-yl)-2-phenyl-1H-indole (33c)

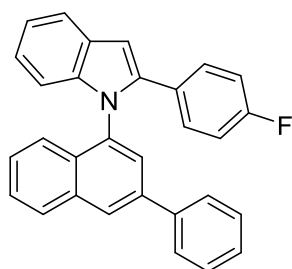

The title compound was prepared according to the general procedure and purified by column chromatography on silica gel and eluted with petroleum ether/dichloromethane (10/1) to afford a white powder in 90% yield (81.2 mg). mp 199–200 °C. <sup>1</sup>H NMR (400 MHz, CDCl<sub>3</sub>) δ 8.15 (s, 1H), 7.99 (d, *J* = 8.2 Hz, 1H), 7.80 (d, *J* = 7.8 Hz, 1H), 7.70–7.68 (m, 1H), 7.58 (d, *J* = 8.3 Hz, 2H), 7.54–7.45 (m, 4H), 7.40–7.35 (m, 1H), 7.33–7.28 (m, 2H), 7.25–7.20 (m, 1H), 7.16–7.11 (m, 4H), 6.99 (s, 1H), 6.94 (d, *J* = 8.2 Hz, 1H), 1.39 (s, 9H). <sup>13</sup>C NMR (101 MHz, CDCl<sub>3</sub>) δ 150.8, 142.1, 140.1, 138.1, 136.9, 135.7, 134.6, 132.4, 130.2, 128.5, 128.2, 128.1, 128.1, 127.3, 126.8, 126.8, 126.6, 125.8, 125.8, 123.5, 122.2, 120.6, 120.4, 111.2, 103.2, 34.5, 31.3. HRMS (EI) *m/z*: [M]<sup>+</sup> calcd for C<sub>34</sub>H<sub>29</sub>N 451.2300; found 451.2302.

### 1-(3-(4-methoxyphenyl)naphthalen-1-yl)-2-phenyl-1H-indole (34c)

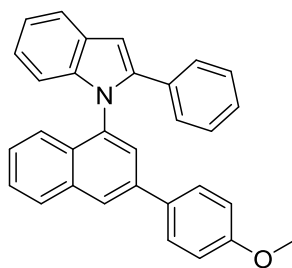

The title compound was prepared according to the general procedure and purified by column chromatography on silica gel and eluted with petroleum ether/dichloromethane (10/1) to afford a white powder in 92% yield (78.2 mg). mp 218–219 °C. <sup>1</sup>H NMR (400 MHz, CDCl<sub>3</sub>) δ 8.06 (s, 1H), 7.96 (d, *J* = 8.2 Hz, 1H), 7.76 (d, *J* = 7.7 Hz, 1H), 7.60 (s, 1H), 7.55–7.48 (m, 3H), 7.45 (d, *J* = 8.4 Hz, 1H), 7.34 (t, *J* = 7.6 Hz, 1H), 7.30–7.25 (m, 2H), 7.20 (t, *J* = 7.4 Hz, 1H), 7.06–7.13 (m, 4H), 7.00–6.94 (m, 3H), 6.91 (d, *J* = 8.2 Hz, 1H), 3.84 (s, 3H). <sup>13</sup>C NMR (100 MHz, CDCl<sub>3</sub>) δ 159.4, 142.1, 140.1, 137.9, 135.7, 134.6, 132.5, 132.3, 130.0, 128.4, 128.2, 128.2, 128.1, 127.3, 126.8, 126.7, 126.5, 125.3, 123.5, 122.2, 120.6, 120.48, 114.3, 111.2, 103.2, 55.3. HRMS (EI) *m/z*: [M]<sup>+</sup> calcd for C<sub>31</sub>H<sub>23</sub>NO 425.1780; found 425.1781.

### 1-(3-(4-fluorophenyl)naphthalen-1-yl)-2-phenyl-1H-indole (35c)

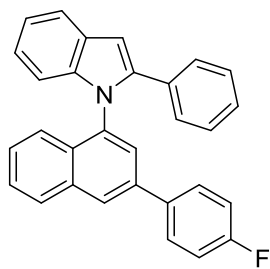

The title compound was prepared according to the general procedure and purified by column chromatography on silica gel and eluted with petroleum ether/dichloromethane (10/1) to afford a white powder in 86% yield (71.0 mg). mp 210–211 °C. <sup>1</sup>H NMR (400 MHz, CDCl<sub>3</sub>) δ 8.07 (s, 1H), 7.98 (d, *J* = 8.2 Hz, 1H), 7.79 (d, *J* = 7.8 Hz, 1H), 7.58–7.49 (m, 5H), 7.43–7.36 (m, 1H), 7.32–7.27 (m, 2H), 7.25–7.19 (m, 1H), 7.16–7.09 (m, 6H), 6.99 (s, 1H), 6.92 (d, *J* = 8.2 Hz, 1H). <sup>13</sup>C NMR (101 MHz, CDCl<sub>3</sub>) δ 162.7

(d,  $J = 247.3$  Hz), 142.1, 140.2, 137.4, 136.10 (d,  $J = 3.3$  Hz), 136.0, 134.6, 132.5, 130.3, 128.9, 128.8, 128.5, 128.3, 128.2, 128.2, 127.4, 127.1, 127.1, 126.6, 126.0, 123.6, 122.4, 120.70 (d,  $J = 17.5$  Hz), 115.87 (d,  $J = 21.5$  Hz), 111.2, 103.4.  $^{19}\text{F}$  NMR (376 M,  $\text{CDCl}_3$ ):  $\delta$  -114.7 (s, 1F). HRMS (EI)  $m/z$ :  $[\text{M}]^+$  calcd for  $\text{C}_{30}\text{H}_{20}\text{FN}$  413.1580; found 413.1582.

### 1-(3-(4-chlorophenyl)naphthalen-1-yl)-2-phenyl-1H-indole (36c)

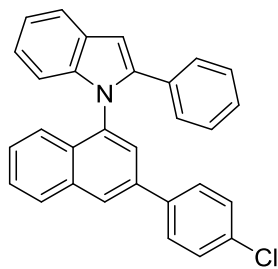

The title compound was prepared according to the general procedure and purified by column chromatography on silica gel and eluted with petroleum ether/dichloromethane (10/1) to afford a white powder in 89% yield (76.4 mg). mp 212–213 °C.  $^1\text{H}$  NMR (400 MHz,  $\text{CDCl}_3$ )  $\delta$  8.06 (s, 1H), 7.97 (d,  $J = 8.2$  Hz, 1H), 7.76 (d,  $J = 7.8$  Hz, 1H), 7.56–7.44 (m, 5H), 7.41–7.35 (m, 3H), 7.28–7.23 (m, 3H), 7.19 (t,  $J = 7.4$  Hz, 1H), 7.13–7.09 (m, 4H), 6.96 (s, 1H), 6.89 (d,  $J = 8.0$  Hz, 1H).  $^{13}\text{C}$  NMR (101 MHz,  $\text{CDCl}_3$ )  $\delta$  142.0, 140.1, 138.3, 137.0, 136.0, 134.5, 133.8, 132.4, 130.4, 129.0, 128.5, 128.4, 128.2, 128.2, 128.6, 127.3, 127.2, 127.1, 126.4, 126.0, 123.6, 122.3, 120.7, 120.5, 111.1, 103.4. HRMS (EI)  $m/z$ :  $[\text{M}]^+$  calcd for  $\text{C}_{30}\text{H}_{20}\text{ClN}$  429.1284; found 429.1285.

### 1-(3-(3-chlorophenyl)naphthalen-1-yl)-2-phenyl-1H-indole (37c)

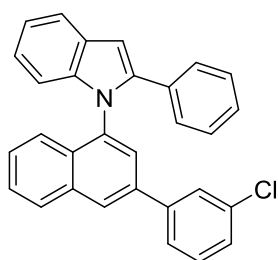

The title compound was prepared according to the general procedure and purified by column chromatography on silica gel and eluted with petroleum ether/dichloromethane (10/1) to afford a white powder in 77% yield (66.1 mg). mp 180–181 °C.  $^1\text{H}$  NMR (400 MHz,  $\text{CDCl}_3$ )  $\delta$  8.10 (s, 1H), 8.00 (d,  $J = 8.1$  Hz, 1H), 7.79 (d,  $J = 7.6$  Hz, 1H), 7.60–7.51 (m, 4H), 7.46–7.39 (m, 2H), 7.38–7.33 (m, 2H), 7.31–7.27 (m, 2H), 7.26–7.20 (m, 1H), 7.16–7.10 (m, 4H), 6.99 (s, 1H), 6.92 (d,  $J = 8.2$  Hz, 1H).  $^{13}\text{C}$  NMR (101 MHz,  $\text{CDCl}_3$ )  $\delta$  142.0, 141.7, 140.1, 136.8, 136.0, 134.8, 134.4, 132.4, 130.5, 130.1, 128.6, 128.3, 128.2, 128.1, 127.6, 127.4, 127.3, 127.1, 126.4, 126.3, 125.3, 123.5, 122.3, 120.7, 120.5, 111.1, 103.4, 77.0. HRMS (EI)  $m/z$ :  $[\text{M}]^+$  calcd for  $\text{C}_{30}\text{H}_{20}\text{ClN}$  429.1284; found 429.1290.

### 2-phenyl-1-(3-(4-(trifluoromethyl)phenyl)naphthalen-1-yl)-1H-indole (38c)

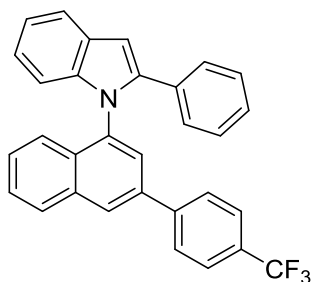

The title compound was prepared according to the general procedure and purified by column chromatography on silica gel and eluted with petroleum ether/dichloromethane (10/1) to afford a white powder in 85% yield (78.7 mg). mp 222–223 °C. <sup>1</sup>H NMR (400 MHz, CDCl<sub>3</sub>) δ 8.13 (s, 1H), 8.01 (d, *J* = 8.2 Hz, 1H), 7.77 (d, *J* = 7.8 Hz, 1H), 7.67 (q, *J* = 8.6 Hz, 4H), 7.60–7.52 (m, 3H), 7.46–7.38 (m, 1H), 7.28–7.24 (m, 2H), 7.21 (t, *J* = 7.4 Hz, 1H), 7.16–7.07 (m, 4H), 6.97 (s, 1H), 6.90 (d, *J* = 8.2 Hz, 1H). <sup>13</sup>C NMR (101 MHz, CDCl<sub>3</sub>) δ 143.4, 142.1, 140.1, 136.8, 136.2, 134.4, 132.4, 130.7, 128.7, 128.3, 128.2, 128.1, 127.5, 127.4, 127.4, 127.2, 126.6, 126.4, 125.8 (q, *J* = 1.7 Hz), 123.6, 122.4, 120.8, 120.6, 111.1, 103.5. <sup>19</sup>F NMR (376 MHz, CDCl<sub>3</sub>) δ -62.46 (s, 1F). HRMS (EI) *m/z*: [M]<sup>+</sup> calcd for C<sub>31</sub>H<sub>20</sub>F<sub>3</sub>C 463.1548; found 463.1545.

### 2-phenyl-1-(3-(thiophen-3-yl)naphthalen-1-yl)-1H-indole (39c)

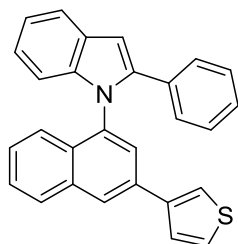

The title compound was prepared according to the general procedure and purified by column chromatography on silica gel and eluted with petroleum ether/dichloromethane (10/1) to afford a white powder in 76% yield (61.0 mg). mp 176–177 °C. <sup>1</sup>H NMR (400 MHz, CDCl<sub>3</sub>) δ 8.13 (s, 1H), 7.96 (d, *J* = 8.2 Hz, 1H), 7.80 (d, *J* = 7.9 Hz, 1H), 7.68–7.65 (m, 1H), 7.51 (t, *J* = 7.5 Hz, 1H), 7.48–7.43 (m, 3H), 7.42–7.39 (m, 1H), 7.39–7.34 (m, 1H), 7.33–7.30 (m, 2H), 7.23 (t, *J* = 7.5 Hz, 1H), 7.16–7.10 (m, 4H), 6.99 (s, 1H), 6.92 (d, *J* = 8.2 Hz, 1H). <sup>13</sup>C NMR (101MHz, CDCl<sub>3</sub>) δ 142.0, 141.1, 140.1, 135.8, 134.6, 133.0, 132.4, 130.3, 128.3, 128.2, 128.1, 128.1, 127.3, 127.0, 126.8, 126.6, 126.1, 126.1, 125.1, 123.5, 122.3, 121.0, 120.7, 120.5, 111.2, 103.2. HRMS (EI) *m/z*: [M]<sup>+</sup> calcd for C<sub>28</sub>H<sub>19</sub>NS 401.1238; found 401.1233.

### 1-(3-(tert-butyl)naphthalen-1-yl)-2-phenyl-1H-indole (40c)

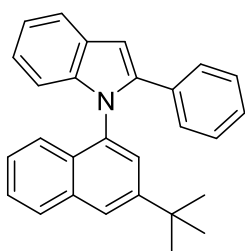

The title compound was prepared according to the general procedure and purified by column chromatography on silica gel and eluted with petroleum ether/dichloromethane (10/1) to afford a sticky pale yellow liquid in 84% yield (63.0 mg). <sup>1</sup>H NMR (400 MHz, CDCl<sub>3</sub>) δ 7.92 (d, *J* = 8.4 Hz, 1H), 7.83 (s, 1H), 7.79 (d, *J* = 7.8 Hz, 1H), 7.53–7.47 (m, 2H), 7.39–7.33 (m, 2H), 7.25–7.19 (m, 3H), 7.15–7.10 (m, 4H), 6.97 (s, 1H), 6.92 (d, *J* = 8.2 Hz, 1H), 1.28 (s, 9H). <sup>13</sup>C NMR (101 MHz, CDCl<sub>3</sub>) δ 148.4, 142.2, 139.8, 134.7, 134.2, 132.5, 129.2, 128.3,



128.2, 128.2, 127.9, 127.1, 126.6, 126.3, 126.2, 123.3, 123.1, 122.1, 120.5, 120.4, 111.4, 103.0, 34.7, 30.8. HRMS (EI) m/z: [M]<sup>+</sup> calcd for C<sub>28</sub>H<sub>27</sub>N 377.2143; found 377.2145.

### 1-(3-hexylnaphthalen-1-yl)-2-phenyl-1H-indole (41c)

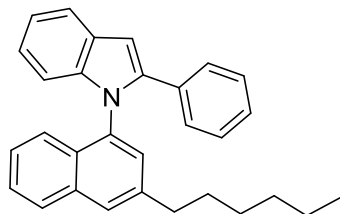

The title compound was prepared according to the general procedure and purified by column chromatography on silica gel and eluted with petroleum ether/dichloromethane (10/1) to afford a white powder in 80% yield (64.5 mg). mp 155–156 °C. <sup>1</sup>H NMR (400 MHz, CDCl<sub>3</sub>) δ 7.92 (d, *J* = 8.2 Hz, 1H), 7.82 (d, *J* = 7.8 Hz, 1H), 7.74 (s, 1H), 7.55–7.50 (m, 2H), 7.39–7.35 (m, 1H), 7.31–7.27 (m, 3H), 7.24 (s, 1H), 7.19–7.14 (m, 4H), 7.01 (s, 1H), 6.93 (d, *J* = 8.2 Hz, 1H), 2.77 (t, *J* = 7.4 Hz, 2H), 1.35–1.29 (m, 8H), 0.95 (t, *J* = 6.7 Hz, 3H). <sup>13</sup>C NMR (101 MHz, CDCl<sub>3</sub>) δ 142.1, 140.4, 140.2, 135.1, 134.5, 132.6, 129.7, 128.7, 128.2, 128.0, 127.8, 127.2, 127.0, 126.5, 126.1, 123.5, 122.2, 120.6, 120.5, 111.3, 103.1, 35.7, 31.7, 31.0, 28.6, 22.6, 14.1. HRMS (EI) m/z: [M]<sup>+</sup> calcd for C<sub>30</sub>H<sub>29</sub>N 403.2300; found 403.2302.

### 3-(3-cyclohexylnaphthalen-1-yl)-2-phenyl-1H-indole (42c)

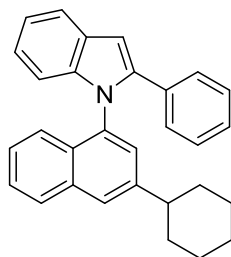

The title compound was prepared according to the general procedure and purified by column chromatography on silica gel and eluted with petroleum ether/dichloromethane (10/1) to afford a sticky pale yellow liquid in 85% yield (68.2 mg). <sup>1</sup>H NMR (400 MHz, CDCl<sub>3</sub>) δ 7.92 (d, *J* = 8.2 Hz, 1H), 7.80 (d, *J* = 7.8 Hz, 1H), 7.74 (s, 1H), 7.53–7.44 (m, 2H), 7.35 (t, *J* = 7.6 Hz, 1H), 7.28–7.20 (m, 4H), 7.18–7.11 (m, 4H), 6.99 (s, 1H), 6.91 (d, *J* = 8.2 Hz, 1H), 2.71–2.59 (m, 1H), 1.97–1.83 (m, 4H), 1.78 (d, *J* = 12.9 Hz, 1H), 1.60 (s, 1H), 1.47–1.36 (m, 4H). <sup>13</sup>C NMR (101 MHz, CDCl<sub>3</sub>) δ 145.4, 142.1, 140.0, 134.9, 134.4, 132.5, 129.7, 128.2, 128.1, 127.9, 127.9, 127.5, 127.1, 126.3, 126.0, 125.0, 123.4, 122.1, 120.5, 120.4, 111.3, 102.9, 44.1, 34.2, 33.9, 26.7, 26.7, 26.0. HRMS (EI) m/z: [M]<sup>+</sup> calcd for C<sub>30</sub>H<sub>27</sub>N 401.2143; found 401.2140.

### 1-(3-cyclopropyl-naphthalen-1-yl)-2-phenyl-1H-indole (43c)

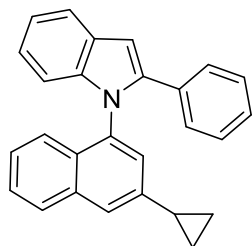

The title compound was prepared according to the general procedure and purified by column chromatography on silica gel and eluted with petroleum ether/dichloromethane (10/1) to afford a sticky pale yellow liquid in 81% yield (58.2 mg). <sup>1</sup>H NMR (400 MHz, CDCl<sub>3</sub>) δ 7.90 (d, *J* = 8.2 Hz, 1H), 7.82 (d, *J* = 7.8 Hz, 1H), 7.69 (s, 1H), 7.54–7.46 (m, 2H), 7.38–7.32 (m, 1H), 7.32–7.23 (m, 3H), 7.21–7.13 (m, 4H), 7.04 (d, *J* = 1.5 Hz, 1H), 7.01 (s, 1H), 6.92 (d, *J* = 8.2 Hz, 1H), 2.15–1.93 (m, 1H), 1.06–1.01 (m, 2H), 0.82–0.75 (m, 1H), 0.63–0.58 (m, 1H). <sup>13</sup>C NMR (101 MHz, CDCl<sub>3</sub>) δ 142.0, 141.5, 140.0, 135.2, 134.3, 132.5, 129.5, 128.1, 128.0, 127.5, 127.2, 126.5, 125.9, 125.5, 124.5, 123.4, 122.1, 120.5, 120.4, 111.2, 103.0, 15.4, 9.6, 9.1. HRMS (EI) *m/z*: [M]<sup>+</sup> calcd for C<sub>27</sub>H<sub>21</sub>N 359.1674; found 359.1675.

### 2-(4-(2-phenyl-1H-indol-1-yl)naphthalen-2-yl)ethan-1-ol (44c)

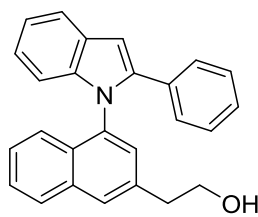

The title compound was prepared according to the general procedure and purified by column chromatography on silica gel and eluted with petroleum ether/dichloromethane (10/1) to afford a sticky pale yellow liquid in 59% yield (42.8 mg). <sup>1</sup>H NMR (400 MHz, CDCl<sub>3</sub>) δ 7.96 (d, *J* = 8.2 Hz, 1H), 7.84 (d, *J* = 7.6 Hz, 1H), 7.80 (s, 1H), 7.63 (d, *J* = 8.4 Hz, 1H), 7.58 (t, *J* = 7.5 Hz, 1H), 7.48–7.39 (m, 1H), 7.32–7.24 (m, 3H), 7.23–7.12 (m, 5H), 7.03 (s, 1H), 6.94 (d, *J* = 8.2 Hz, 1H), 3.78 (t, *J* = 6.3 Hz, 2H), 3.02–2.90 (m, 2H). <sup>13</sup>C NMR (101 MHz, CDCl<sub>3</sub>) δ 142.0, 139.9, 136.0, 135.3, 134.4, 132.5, 129.8, 128.5, 128.3, 128.2, 128.0, 127.9, 127.8, 127.3, 126.7, 126.5, 123.5, 122.2, 120.6, 120.5, 111.2, 103.3, 63.2, 38.8. HRMS (EI) *m/z*: [M]<sup>+</sup> calcd for C<sub>26</sub>H<sub>21</sub>NO 363.1623; found 363.1624.

### 1-(3-(cyclohex-1-en-1-yl)naphthalen-1-yl)-2-phenyl-1H-indole (45c)

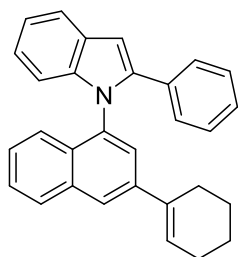

The title compound was prepared according to the general procedure and purified by column chromatography on silica gel and eluted with petroleum ether/dichloromethane (10/1) to afford a white powder in 75% yield (59.9 mg). mp 196–197 °C. <sup>1</sup>H NMR (400 MHz, CDCl<sub>3</sub>) δ 7.92–7.85 (m, 2H), 7.78 (d, *J* = 7.8 Hz, 1H), 7.55 (s, 1H), 7.50–7.41 (m, 1H), 7.39 (d, *J* = 8.4 Hz, 1H), 7.36–7.32 (m, 3H), 7.33–7.27 (m, 1H), 7.23–7.19 (m, 1H), 7.15–7.11 (m, 3H), 6.98–6.96 (m, 1H), 6.90 (d, *J* = 7.9 Hz, 1H), 6.20 (s, 1H), 2.57–2.40 (m, 2H), 2.23 (s, 2H), 1.86–1.1.78 (m, 2H), 1.74–1.64 (m, 2H). <sup>13</sup>C NMR (101 MHz, CDCl<sub>3</sub>) δ 142.0, 140.2, 139.5, 135.3, 135.0, 134.3, 132.5,

130.1, 128.3, 128.1, 128.1, 128.0, 127.2, 126.5, 126.3, 126.2, 125.0, 123.4, 123.3, 122.1, 120.5, 120.3, 111.2, 103.0, 27.1, 25.9, 22.9, 22.0. HRMS (EI)  $m/z$ :  $[M]^+$  calcd for  $C_{30}H_{25}N$  399.1987; found 399.1983.

#### 5-methyl-2-phenyl-1-(3-phenylnaphthalen-1-yl)-1H-indole (46c)

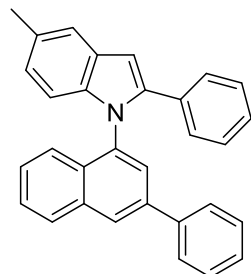

The title compound was prepared according to the general procedure and purified by column chromatography on silica gel and eluted with petroleum ether/dichloromethane (10/1) to afford a white powder in 90% yield (73.6 mg). mp 189–190 °C.  $^1H$  NMR (400 MHz,  $CDCl_3$ )  $\delta$  8.14 (s, 1H), 8.00 (d,  $J$  = 8.2 Hz, 1H), 7.69–7.59 (m, 4H), 7.56–7.43 (m, 4H), 7.41–7.34 (m, 2H), 7.31–7.23 (m, 2H), 7.14–7.07 (m, 3H), 7.05 (d,  $J$  = 8.0 Hz, 1H), 6.93 (s, 1H), 6.71 (s, 1H), 2.34 (s, 3H).  $^{13}C$  NMR (101 MHz,  $CDCl_3$ )  $\delta$  141.6, 140.6, 139.9, 138.3, 136.0, 134.5, 132.6, 132.2, 130.4, 128.9, 128.5, 128.0, 128.0, 127.6, 127.2, 127.1, 127.0, 126.9, 126.7, 126.0, 123.6, 122.4, 120.1, 111.0, 103.1, 21.7. HRMS (EI)  $m/z$ :  $[M]^+$  calcd for  $C_{31}H_{23}N$  409.1830; found 409.1828.

#### 5-fluoro-2-phenyl-1-(3-phenylnaphthalen-1-yl)-1H-indole (47c)

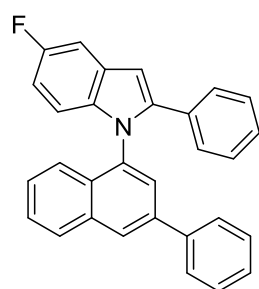

The title compound was prepared according to the general procedure and purified by column chromatography on silica gel and eluted with petroleum ether/dichloromethane (10/1) to afford a white powder in 80% yield (66.1 mg). mp 167–168 °C.  $^1H$  NMR (400 MHz,  $CDCl_3$ )  $\delta$  8.15 (s, 1H), 8.00 (d,  $J$  = 8.2 Hz, 1H), 7.66 (s, 1H), 7.61 (d,  $J$  = 7.4 Hz, 2H), 7.55 (t,  $J$  = 7.4 Hz, 1H), 7.50–7.35 (m, 6H), 7.33–7.28 (m, 2H), 7.17–7.11 (m, 3H), 6.94 (s, 1H), 6.91–6.80 (m, 2H).  $^{13}C$  NMR (101 MHz,  $CDCl_3$ )  $\delta$  158.4 (d,  $J$  = 235.4 Hz), 143.6, 139.7, 138.3, 136.7, 135.6, 134.6, 132.1, 130.2, 128.9, 128.6, 128.5, 128.4, 128.1 (d,  $J$  = 1.9 Hz), 127.7, 127.6, 127.2, 127.1, 127.0, 126.7, 126.3, 111.9 (d,  $J$  = 9.6 Hz), 110.6, 110.4, 105.2 (d,  $J$  = 23.6 Hz), 103.1 (d,  $J$  = 4.5 Hz).  $^{19}F$  NMR (376 MHz,  $CDCl_3$ )  $\delta$  -123.6 (s, 1F). HRMS (EI)  $m/z$ :  $[M]^+$  calcd for  $C_{30}H_{20}FN$  413.1580; found 413.1585.

#### 1-chloro-2-phenyl-1-(3-phenylnaphthalen-1-yl)-1H-indole (48c)

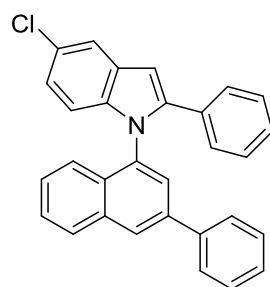

The title compound was prepared according to the general procedure and purified by column chromatography on silica gel and eluted with petroleum ether/dichloromethane (10/1) to afford a white powder in 83% yield (71.2 mg). mp 156–157 °C.  $^1H$  NMR (400 MHz,  $CDCl_3$ )  $\delta$  8.19 (s, 1H), 8.02 (d,  $J$  = 8.2 Hz, 1H), 7.79 (s, 1H), 7.69 (s, 1H), 7.63 (d,  $J$  = 8.1 Hz, 2H), 7.56 (t,  $J$  = 7.4 Hz, 1H), 7.53–7.45

(m, 3H), 7.44–7.38 (m, 2H), 7.36–7.31 (m, 2H), 7.19–7.15 (m, 3H), 7.11 (d,  $J = 8.7$  Hz, 1H), 6.95 (s, 1H), 6.86 (d,  $J = 8.7$  Hz, 1H).  $^{13}\text{C}$  NMR (101MHz,  $\text{CDCl}_3$ )  $\delta$  143.3, 139.6, 138.5, 138.3, 135.3, 134.5, 131.9, 130.1, 129.2, 128.9, 128.6, 128.1, 127.7, 127.6, 127.1, 127.0, 126.6, 126.3, 126.2, 123.1, 122.5, 119.8, 112.2, 102.6. HRMS (EI)  $m/z$ :  $[\text{M}]^+$  calcd for  $\text{C}_{30}\text{H}_{20}\text{ClN}$  429.1284; found 429.1286.

#### 2-(4-(tert-butyl)phenyl)-5-methyl-1-(3-phenylnaphthalen-1-yl)-1H-indole (49c)

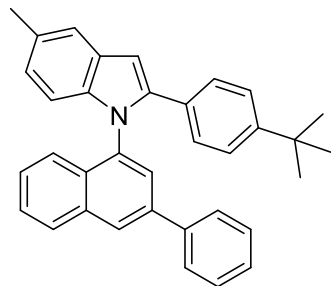

The title compound was prepared according to the general procedure and purified by column chromatography on silica gel and eluted with petroleum ether/dichloromethane (10/1) to afford a white powder in 88% yield (81.8 mg). mp 191–192 °C.  $^1\text{H}$  NMR (400 MHz,  $\text{CDCl}_3$ )  $\delta$  8.13 (s, 1H), 8.01 (d,  $J = 8.2$  Hz, 1H), 7.62–7.51 (m, 6H), 7.48–7.31 (m, 4H), 7.21 (d,  $J = 8.5$  Hz, 2H), 7.16 (d,  $J = 8.5$  Hz, 2H), 6.96–6.86 (m, 2H), 6.78 (d,  $J = 8.3$  Hz, 1H), 2.50 (s, 3H), 1.22 (s, 9H).  $^{13}\text{C}$  NMR (101 MHz,  $\text{CDCl}_3$ )  $\delta$  150.1, 142.1, 140.0, 138.6, 138.3, 136.1, 134.5, 130.4, 129.8, 129.6, 128.8, 128.5, 128.5, 127.7, 127.6, 127.2, 126.9, 126.8, 126.8, 126.0, 125.1, 123.7, 123.6, 120.0, 110.9, 102.5, 34.4, 31.1, 21.4. HRMS (EI)  $m/z$ :  $[\text{M}]^+$  calcd for  $\text{C}_{35}\text{H}_{31}\text{N}$  465.2457; found 465.2459.

#### 2-(4-methoxyphenyl)-5-methyl-1-(3-phenylnaphthalen-1-yl)-1H-indole (50c)

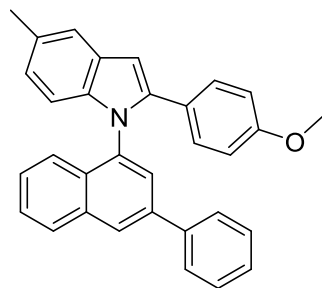

The title compound was prepared according to the general procedure and purified by column chromatography on silica gel and eluted with petroleum ether/dichloromethane (10/1) to afford a white powder in 90% yield (79.0 mg). mp 211–212 °C.  $^1\text{H}$  NMR (400 MHz,  $\text{CDCl}_3$ )  $\delta$  8.14 (s, 1H), 7.99 (d,  $J = 8.2$  Hz, 1H), 7.68–7.61 (m, 3H), 7.57–7.50 (m, 2H), 7.50–7.43 (m, 3H), 7.38 (t,  $J = 7.5$  Hz, 2H), 7.22 (d,  $J = 8.6$  Hz, 2H), 6.94 (d,  $J = 8.3$  Hz, 1H), 6.86–6.78 (m, 2H), 6.66 (d,  $J = 8.6$  Hz, 2H), 3.68 (s, 3H), 2.50 (s, 3H).  $^{13}\text{C}$  NMR (101 MHz,  $\text{CDCl}_3$ )  $\delta$  158.8, 142.0, 139.9, 138.5, 138.2, 136.1, 134.5, 130.4, 129.8, 129.3, 128.9, 128.5, 128.5, 127.6, 127.2, 126.9, 126.8, 126.6, 125.9, 125.1, 123.6, 123.5, 119.9, 113.6, 110.7, 101.9, 55.0, 21.4. HRMS (EI)  $m/z$ :  $[\text{M}]^+$  calcd for  $\text{C}_{32}\text{H}_{25}\text{NO}$  439.1936; found 439.1937.

### 2-(3-chlorophenyl)-5-methyl-1-(3-phenylnaphthalen-1-yl)-1H-indole (51c)

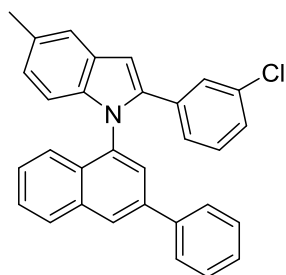

The title compound was prepared according to the general procedure and purified by column chromatography on silica gel and eluted with petroleum ether/dichloromethane (10/1) to afford a white powder in 78% yield (69.1 mg). mp 177–178 °C. <sup>1</sup>H NMR (400 MHz, CDCl<sub>3</sub>) δ 8.15 (s, 1H), 8.00 (d, *J* = 8.2 Hz, 1H), 7.67 (s, 1H), 7.63 (d, *J* = 7.4 Hz, 2H), 7.59–7.51 (m, 2H), 7.47 (t, *J* = 7.6 Hz, 2H),

7.44–7.35 (m, 4H), 7.08 (d, *J* = 7.7 Hz, 1H), 7.04–6.94 (m, 3H), 6.92 (s, 1H), 6.83 (d, *J* = 8.4 Hz, 1H), 2.50 (s, 3H).

<sup>13</sup>C NMR (101 MHz, CDCl<sub>3</sub>) δ 140.48, 139.86, 138.87, 138.38, 135.67, 134.61, 134.37, 133.98, 130.32, 130.19, 129.28, 128.95, 128.6, 128.26, 128.1, 127.7, 127.2, 127.1, 127.0, 126.6, 126.3, 125.9, 124.3, 123.3, 120.3, 110.9, 103.5, 21.4. HRMS (EI) *m/z*: [M]<sup>+</sup> calcd for C<sub>31</sub>H<sub>22</sub>ClN 443.1441; found 443.1443.

### 6-methyl-2-phenyl-1-(3-phenylnaphthalen-1-yl)-1H-indole (52c)

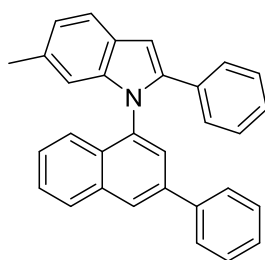

The title compound was prepared according to the general procedure and purified by column chromatography on silica gel and eluted with petroleum ether/dichloromethane (10/1) to afford a white powder in 89% yield (72.8 mg). mp 169–170 °C. <sup>1</sup>H NMR (400 MHz, CDCl<sub>3</sub>) δ 8.15 (s, 1H), 8.00 (d, *J* = 8.2 Hz, 1H), 7.72–7.60 (m, 4H), 7.57–7.42 (m, 4H), 7.42–7.34 (m, 2H), 7.31–7.27 (m, 2H), 7.14–

7.09 (m, 3H), 7.05 (d, *J* = 8.0 Hz, 1H), 6.93 (s, 1H), 6.72 (s, 1H), 2.35 (s, 3H). <sup>13</sup>C NMR (101 MHz, CDCl<sub>3</sub>) δ 141.60, 140.66, 139.93, 138.30, 136.03, 134.56, 132.65, 132.26, 130.49, 128.92, 128.52, 128.09, 128.06, 127.68, 127.22, 127.15, 127.01, 126.93, 126.75, 126.07, 123.60, 122.45, 120.15, 111.05, 103.15, 21.78. HRMS (EI) *m/z*: [M]<sup>+</sup> calcd for C<sub>31</sub>H<sub>23</sub>N 409.1830; found 409.1825.

### 6-chloro-2-phenyl-1-(3-phenylnaphthalen-1-yl)-1H-indole (53c)

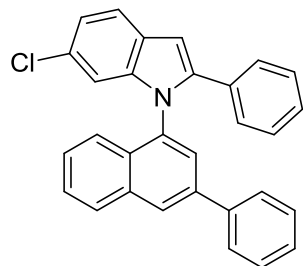

The title compound was prepared according to the general procedure and purified by column chromatography on silica gel and eluted with petroleum ether/dichloromethane (10/1) to afford a white sticky liquid in 81% yield (69.5 mg). mp 176–177 °C. <sup>1</sup>H NMR (400 MHz, CDCl<sub>3</sub>) δ 8.06 (d, *J* = 8.2 Hz, 1H), 7.98 (d, *J* = 7.9 Hz, 2H), 7.82 (s, 1H), 7.74 (d, *J* = 7.5 Hz, 2H), 7.59–7.48 (m, 6H),

7.47–7.35 (m, 5H), 6.87 (s, 2H), 6.79 (d, *J* = 8.2 Hz, 1H). <sup>13</sup>C NMR (101 MHz, CDCl<sub>3</sub>) δ 147.8, 140.4, 138.8, 136.7,

135.6, 135.0, 133.1, 131.5, 128.9, 128.6, 128.5, 128.4, 127.6, 127.3, 126.8, 126.4, 123.5, 122.6, 122.0, 120.6, 118.6, 112.7, 107.4, 96.4, 84.7. HRMS (EI)  $m/z$ :  $[M]^+$  calcd for  $C_{30}H_{20}ClN$  429.1284; found 429.1288.

#### 1-(3-cyclopropyl-naphthalen-1-yl)-6-methyl-2-phenyl-1H-indole (54c)

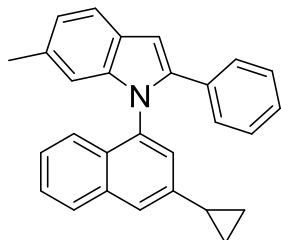

The title compound was prepared according to the general procedure and purified by column chromatography on silica gel and eluted with petroleum ether/dichloromethane (10/1) to afford a sticky pale yellow liquid in 80% yield (59.7 mg).  $^1H$  NMR (400 MHz,  $CDCl_3$ )  $\delta$  7.87 (d,  $J = 8.1$  Hz, 1H), 7.73–7.63 (m, 2H), 7.54–7.45 (m, 2H), 7.37–7.32 (m, 1H), 7.29–7.24 (m, 2H), 7.18–7.13 (m, 3H), 7.08 (d,  $J = 8.0$  Hz, 1H), 7.05–7.03 (m, 1H), 6.95 (s, 1H), 6.71 (s, 1H), 2.38 (s, 3H), 2.07–1.95 (m, 1H), 1.07–0.94 (m, 2H), 0.86–0.71 (m, 1H), 0.68–0.51 (m, 1H).  $^{13}C$  NMR (101 MHz,  $CDCl_3$ )  $\delta$  141.57, 141.49, 140.53, 135.43, 134.32, 132.65, 132.11, 129.64, 128.01, 127.52, 127.02, 126.58, 125.98, 125.93, 125.53, 124.41, 123.52, 122.35, 120.10, 111.08, 102.96, 21.75, 15.42, 9.68, 9.22. HRMS (EI)  $m/z$ :  $[M]^+$  calcd for  $C_{28}H_{23}N$  373.1830; found 373.1832.

#### 2-cyclopropyl-1-(6-methoxy-7-methyl-3-phenylnaphthalen-1-yl)-1H-indole (55c)

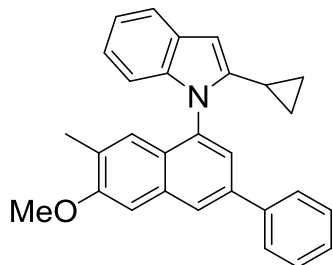

The title compound was prepared according to the general procedure and purified by column chromatography on silica gel and eluted with petroleum ether/dichloromethane (10/1) to afford a sticky pale yellow liquid in 84% yield (67.7 mg).  $^1H$  NMR (400 MHz,  $CDCl_3$ )  $\delta$  8.20 (s, 1H), 7.88–7.83 (m, 2H), 7.81–7.79 (m, 1H), 7.74 (d,  $J = 7.8$  Hz, 1H), 7.57 (t,  $J = 7.6$  Hz, 2H), 7.46 (t,  $J = 7.4$  Hz, 1H), 7.35 (s, 1H), 7.26–7.20 (m, 1H), 7.18–7.10 (m, 2H), 7.01 (d,  $J = 8.1$  Hz, 1H), 6.42 (s, 1H), 4.06 (s, 3H), 2.33 (s, 3H), 1.71–1.62 (m, 1H), 0.93–0.76 (s, 4H).  $^{13}C$  NMR (101 MHz,  $CDCl_3$ )  $\delta$  157.6, 145.1, 140.2, 139.1, 137.9, 134.8, 134.4, 129.9, 128.8, 127.9, 127.5, 127.1, 125.9, 124.8, 121.0, 119.8, 119.6, 110.1, 104.9, 96.6, 55.3, 16.9, 8.4, 8.1, 7.7. HRMS (EI)  $m/z$ :  $[M]^+$  calcd for  $C_{29}H_{25}NO$  403.1936; found 403.1935.

### 5-(6-fluoro-3-phenylnaphthalen-1-yl)-2-phenyl-1H-indole (56c)

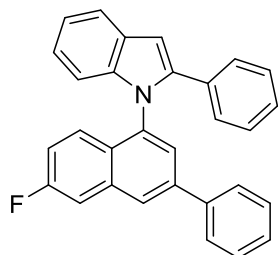

The title compound was prepared according to the general procedure and purified by column chromatography on silica gel and eluted with petroleum ether/dichloromethane (10/1) to afford a pale yellow powder in 91% yield (75.2 mg). mp 225–226 °C. <sup>1</sup>H NMR (400 MHz, CDCl<sub>3</sub>) δ 8.05 (s, 1H), 7.78 (d, *J* = 7.8 Hz, 1H), 7.63 (s, 1H), 7.62–7.57 (m, 3H), 7.45 (t, *J* = 7.4 Hz, 3H), 7.38 (t, *J* = 7.3 Hz, 1H), 7.31–7.27 (m, 2H), 7.22 (t, *J* = 7.4 Hz, 1H), 7.17–7.10 (m, 5H), 6.97 (s, 1H), 6.93 (d, *J* = 8.1 Hz, 1H). <sup>13</sup>C NMR (101 MHz, CDCl<sub>3</sub>) δ 161.2 (d, *J* = 247.9 Hz), 142.0, 140.1, 139.6 (d, *J* = 13.0 Hz), 136.0, 135.5 (d, *J* = 9.3 Hz), 132.3, 128.9, 128.3, 128.1 (d, *J* = 5.6 Hz), 127.9, 127.4, 127.3, 127.2, 126.3, 126.2, 126.0 (d, *J* = 2.0 Hz), 125.3 (d, *J* = 5.4 Hz), 122.4, 120.7 (d, *J* = 23.2 Hz), 117.4, 117.2, 111.7, 111.5, 111.0, 103.4. <sup>19</sup>F NMR (376 MHz, CDCl<sub>3</sub>) δ -113.3 (s, 1F). HRMS (EI) *m/z*: [M]<sup>+</sup> calcd for C<sub>30</sub>H<sub>20</sub>FN 413.1580; found 413.1581.

### 1-(7-fluoro-3-phenylnaphthalen-1-yl)-2-phenyl-1H-indole (57c)

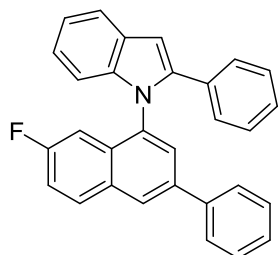

The title compound was prepared according to the general procedure and purified by column chromatography on silica gel and eluted with petroleum ether/dichloromethane (10/1) to afford a pale yellow powder in 87% yield (71.9 mg). mp 228–229 °C. <sup>1</sup>H NMR (400 MHz, CDCl<sub>3</sub>) δ 8.12 (s, 1H), 7.98 (dd, *J* = 9.0, 5.5 Hz, 1H), 7.80 (d, *J* = 7.8 Hz, 1H), 7.73 (s, 1H), 7.60 (d, *J* = 7.4 Hz, 2H), 7.46 (t, *J* = 7.5 Hz, 2H), 7.38 (t, *J* = 7.3 Hz, 1H), 7.34–7.27 (m, 3H), 7.26–7.21 (m, 1H), 7.18–7.13 (m, 4H), 7.09 (dd, *J* = 10.2, 2.2 Hz, 1H), 6.99 (s, 1H), 6.95 (d, *J* = 8.2 Hz, 1H). <sup>13</sup>C NMR (101 MHz, CDCl<sub>3</sub>) δ 161.4 (d, *J* = 248.2 Hz), 141.9, 139.9, 139.6, 137.7 (d, *J* = 2.6 Hz), 135.5 (d, *J* = 5.7 Hz), 132.3, 131.6, 131.4 (d, *J* = 9.0 Hz), 131.1, 131.0, 128.9, 128.3, 128.1, 127.7, 127.4, 127.1, 125.9, 122.5, 120.7 (d, *J* = 21.9 Hz), 117.6, 117.4, 110.9, 107.3, 107.1, 103.6. <sup>19</sup>F NMR (376 MHz, CDCl<sub>3</sub>) δ -111.4 (s, 1F). HRMS (EI) *m/z*: [M]<sup>+</sup> calcd for C<sub>30</sub>H<sub>20</sub>FN 413.1580; found 413.1577.

### 1-(6-methoxy-3-phenylnaphthalen-1-yl)-2-phenyl-1H-indole (58c)

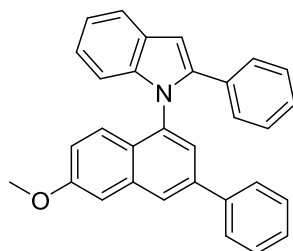

The title compound was prepared according to the general procedure and purified by column chromatography on silica gel and eluted with petroleum ether/dichloromethane (10/1) to afford a pale yellow powder in 91% yield (77.4 mg). mp 180–181 °C. <sup>1</sup>H NMR (400 MHz, CDCl<sub>3</sub>) δ 8.09 (s, 1H), 7.84 (d, *J* = 7.7 Hz, 1H), 7.66 (d, *J* = 7.4 Hz, 2H), 7.59 (s, 1H), 7.52–7.36 (m, 6H), 7.33 (s, 1H),

7.30–7.25 (m, 1H), 7.22–7.14 (m, 4H), 7.09 (d,  $J = 9.1$  Hz, 1H), 7.09–6.98 (m, 2H), 3.96 (s, 3H).  $^{13}\text{C}$  NMR (101 MHz,  $\text{CDCl}_3$ )  $\delta$  158.3, 142.0, 140.1, 140.0, 138.9, 136.0, 135.8, 132.5, 128.8, 128.2, 128.1, 127.6, 127.3, 127.1, 125.8, 125.1, 124.9, 124.3, 122.2, 120.6, 120.4, 119.7, 111.1, 106.4, 103.2, 55.2. HRMS (EI)  $m/z$ :  $[\text{M}]^+$  calcd for  $\text{C}_{31}\text{H}_{23}\text{NO}$  425.1780; found 425.1777.

**1-(6-methoxy-7-methyl-3-phenylnaphthalen-1-yl)-2-phenyl-1H-indole (59c)**

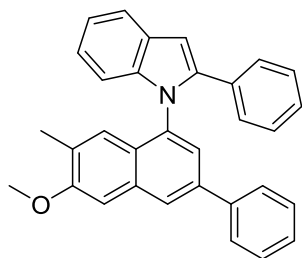

The title compound was prepared according to the general procedure and purified by column chromatography on silica gel and eluted with petroleum ether/dichloromethane (10/1) to afford a pale yellow powder in 85% yield (74.6 mg). mp 188–189 °C.  $^1\text{H}$  NMR (400 MHz,  $\text{CDCl}_3$ )  $\delta$  8.01 (s, 1H), 7.79 (d,  $J = 7.8$  Hz, 1H), 7.60 (d,  $J = 7.8$  Hz, 2H), 7.48–7.40 (m, 3H), 7.37–7.28 (m, 3H), 7.27–7.19 (m, 3H), 7.16–7.09 (m, 4H), 6.99–6.94 (m, 2H), 3.98 (s, 3H), 2.22 (s, 3H).  $^{13}\text{C}$  NMR (101 MHz,  $\text{CDCl}_3$ )  $\delta$  157.5, 142.0, 140.2, 140.2, 137.9, 135.0, 134.8, 132.6, 130.0, 128.8, 128.2, 128.1, 127.4, 127.2, 127.1, 125.6, 124.6, 124.2, 124.2, 122.2, 120.5, 120.4, 111.3, 105.0, 103.0, 55.3, 17.0. HRMS (EI)  $m/z$ :  $[\text{M}]^+$  calcd for  $\text{C}_{32}\text{H}_{25}\text{NO}$  439.1936; found 439.1938.

**1-(6-methoxy-2,7-dimethyl-3-phenylnaphthalen-1-yl)-2-(m-tolyl)-1H-indole (60c)**

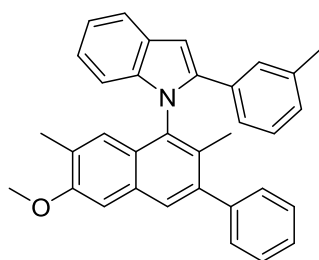

The title compound was prepared according to the general procedure and purified by column chromatography on silica gel and eluted with petroleum ether/dichloromethane(10/1) to afford a white powder in 79% yield (73.8 mg). mp 200–201 °C.  $^1\text{H}$  NMR (400 MHz,  $\text{CDCl}_3$ )  $\delta$  7.80 (d,  $J = 7.8$  Hz, 1H), 7.76 (s, 1H), 7.47–7.41 (m, 2H), 7.40–7.32 (m, 3H), 7.26–7.18 (m, 3H), 7.17–7.07 (m, 3H), 6.98 (d,  $J = 8.4$  Hz, 3H), 6.82 (d,  $J = 8.1$  Hz, 1H), 3.96 (s, 3H), 2.28 (s, 3H), 2.24 (s, 3H), 1.76 (s, 3H).  $^{13}\text{C}$  NMR (101 MHz,  $\text{CDCl}_3$ )  $\delta$  157.0, 141.9, 141.6, 140.8, 138.8, 137.0, 132.9, 132.2, 131.1, 130.0, 129.8, 129.3, 128.8, 128.3, 128.0, 127.7, 127.4, 126.9, 126.6, 124.2, 122.0, 120.3, 120.2, 111.0, 104.4, 101.8, 55.2, 21.0, 17.0, 15.7. HRMS (EI)  $m/z$ :  $[\text{M}]^+$  calcd for  $\text{C}_{34}\text{H}_{29}\text{NO}$  467.2249; found 467.2245.



**2-(4-fluorophenyl)-1-(6-methoxy-2,7-dimethyl-3-phenylnaphthalen-1-yl)-1H-indole (61c)**

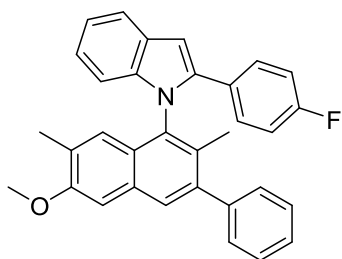

The title compound was prepared according to the general procedure and purified by column chromatography on silica gel and eluted with petroleum ether/dichloromethane(10/1) to afford a light yellow solid in 88% yield (82.9 mg). mp 184-185 °C. <sup>1</sup>H NMR (400 MHz, CDCl<sub>3</sub>) δ 7.76 (d, *J* = 7.8 Hz, 1H), 7.72 (s, 1H), 7.45–7.38 (m, 2H), 7.37–7.32 (m, 1H), 7.29 (d, *J* = 7.5 Hz, 2H),

7.23–7.16 (m, 3H), 7.14–7.08 (m, 2H), 7.04 (s, 1H), 6.93 (s, 1H), 6.87–6.75 (m, 3H), 3.95 (s, 3H), 2.20 (s, 3H), 1.67 (s, 3H). <sup>13</sup>C NMR (101 MHz, CDCl<sub>3</sub>) δ 157.1, 141.5, 140.9, 140.8, 138.8, 132.5, 132.3, 131.1, 130.2, 129.4, 129.3, 128.9, 128.2, 128.1, 127.9, 127.0, 126.5, 124.0, 122.3, 120.5, 120.4, 115.3, 115.0, 111.2, 104.6, 102.2, 55.3, 17.15, 15.8. <sup>1</sup>H NMR (400 MHz, CDCl<sub>3</sub>) <sup>19</sup>F NMR (376 MHz, CDCl<sub>3</sub>) δ -57.54 (s). HRMS (EI) *m/z*: [M]<sup>+</sup> calcd for C<sub>33</sub>H<sub>26</sub>FNO 471.1988; found 471.1985.

**2-(2-chlorophenyl)-1-(6-methoxy-2,7-dimethyl-3-phenylnaphthalen-1-yl)-1H-indole (62c)**

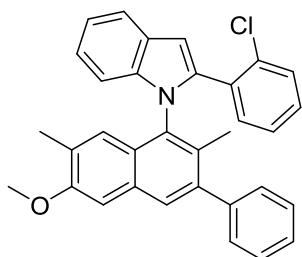

The title compound was prepared according to the general procedure and purified by column chromatography on silica gel and eluted with petroleum ether/dichloromethane(10/1) to afford a white powder in 72% yield (70.2 mg). mp 179–180°C. <sup>1</sup>H NMR (400 MHz, CDCl<sub>3</sub>) δ 7.85 (d, *J* = 7.8 Hz, 1H), 7.67 (s, 1H), 7.48–7.42 (m, 2H), 7.39 (d, *J* = 7.5 Hz, 2H), 7.34 (d, *J* = 7.3 Hz, 2H), 7.28–7.23

(m, 1H), 7.19 (t, *J* = 7.4 Hz, 1H), 7.11 (s, 1H), 7.09–7.03 (m, 3H), 7.01 (d, *J* = 7.6 Hz, 1H), 6.93–6.87 (m, 2H), 3.92 (s, 3H), 2.25 (s, 3H), 1.94 (s, 3H). <sup>13</sup>C NMR (101 MHz, CDCl<sub>3</sub>) δ 156.9, 141.6, 140.6, 137.9, 137.5, 133.6, 132.0, 131.9, 131.2, 131.1, 130.0, 129.8, 129.3, 128.6, 128.0, 127.7, 127.6, 126.9, 126.5, 125.5, 124.2, 122.4, 120.7, 120.4, 111.2, 105.8, 104.3, 55.2, 16.9, 16.3. HRMS (EI) *m/z*: [M]<sup>+</sup> calcd for C<sub>33</sub>H<sub>26</sub>ClNO 487.1703; found 487.1705.

**1-(6-methoxy-2,7-dimethyl-3-phenylnaphthalen-1-yl)-2-(4-methoxyphenyl)-1H-indole (63c)**

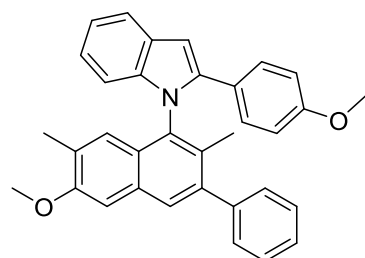

The title compound was prepared according to the general procedure and purified by column chromatography on silica gel and eluted with petroleum ether/dichloromethane(10/1) to afford a white powder in 78% yield (75.4 mg). mp 205-206 °C. δ 7.82–7.70 (m, 2H), 7.46–7.40 (m, 2H), 7.40–7.32

(m, 3H), 7.25–7.17 (t, *J* = 8.3 Hz, 3H), 7.16 (s, 1H), 7.14–7.08 (m, 2H), 6.93 (s, 1H), 6.80 (d, *J* = 8.1 Hz, 1H), 6.71 (d, *J* = 8.1 Hz, 2H), 3.96 (s, 3H), 3.73 (s, 3H), 2.23 (s, 3H), 1.74 (s, 3H).

$^{13}\text{C}$  NMR (101 MHz,  $\text{CDCl}_3$ )  $\delta$  158.9, 157.0, 141.7, 141.5, 140.8, 138.7, 132.8, 132.2, 131.1, 130.0, 129.3, 128.8, 128.3, 128.0, 127.7, 126.9, 126.6, 125.3, 124.2, 121.8, 120.3, 120.1, 113.6, 111.0, 104.5, 101.4, 55.2, 55.0, 17.0, 15.7. HRMS (EI)  $m/z$ :  $[\text{M}]^+$  calcd for  $\text{C}_{34}\text{H}_{29}\text{NO}_2$  483.2198; found 483.2195.

#### 6-phenyl-8-(2-phenyl-1H-indol-1-yl)quinoline (64c)

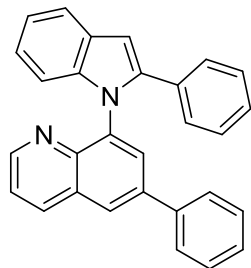

The title compound was prepared according to the general procedure and purified by column chromatography on silica gel and eluted with petroleum ether/ethyl acetate(5/1) to afford a light yellow solid in 76% yield (60.2 mg). mp 170–171 °C  $^1\text{H}$  NMR (400 MHz,  $\text{CDCl}_3$ )  $\delta$  8.85 (s, 1H), 8.25 (d,  $J$  = 8.3 Hz, 1H), 8.06 (s, 1H), 7.86 (s, 1H), 7.77 (d,  $J$  = 7.7 Hz, 1H), 7.57 (d,  $J$  = 7.4 Hz, 2H), 7.49–7.30 (m, 4H), 7.30–7.35 (m, 2H), 7.20 (t,  $J$  = 7.3 Hz, 1H), 7.17–7.08 (m, 4H), 6.99 (d,  $J$  = 7.2 Hz, 2H).  $^{13}\text{C}$  NMR (101 MHz,  $\text{CDCl}_3$ )  $\delta$  150.8, 144.0, 142.4, 140.1, 139.2, 138.9, 136.8, 136.2, 133.1, 129.7, 129.4, 128.9, 128.5, 128.4, 128.0, 127.9, 127.2, 127.0, 125.4, 122.1, 122.0, 120.7, 120.5, 111.22, 103.70. HRMS (EI)  $m/z$ :  $[\text{M}]^+$  calcd for  $\text{C}_{29}\text{H}_{20}\text{N}_2$  396.1626; found 396.1624.

#### 1-(5-phenylbenzofuran-7-yl)-2-(pyridin-3-yl)-1H-indole (65c)

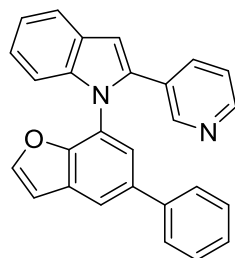

The title compound was prepared according to the general procedure and purified by column chromatography on silica gel and eluted with petroleum ether/ethyl acetate(5/1) to afford a light yellow solid in 78% yield (60.2 mg). mp 175–176 °C.  $^1\text{H}$  NMR (400 MHz,  $\text{CDCl}_3$ )  $\delta$  8.71 (s, 1H), 8.43 (s, 1H), 7.84 (s, 1H), 7.79–7.73 (m, 1H), 7.56–7.48 (m, 5H), 7.44 (t,  $J$  = 7.2 Hz, 2H), 7.35 (t,  $J$  = 7.0 Hz, 1H), 7.28–7.19 (m, 3H), 7.09 (s, 1H), 6.99 (s, 1H), 6.83 (s, 1H).  $^{13}\text{C}$  NMR (101 MHz,  $\text{CDCl}_3$ )  $\delta$  149.2, 149.0, 148.3, 146.2, 140.35, 139.3, 137.6, 137.4, 134.9, 130.0, 128.8, 128.3, 127.3, 127.3, 123.4, 123.0, 122.8, 122.6, 121.1, 120.9, 119.5, 110.9, 107.2, 104.8. HRMS (EI)  $m/z$ :  $[\text{M}]^+$  calcd for  $\text{C}_{27}\text{H}_{18}\text{N}_2\text{O}$  386.1419; found 386.1417.

#### 2-phenyl-1-(5-phenylbenzo[b]thiophen-7-yl)-1H-indole (66c)

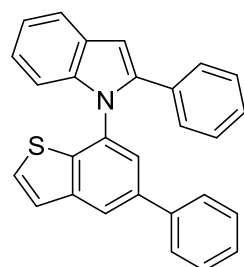

The title compound was prepared according to the general procedure and purified by column chromatography on silica gel and eluted with petroleum ether/dichloromethane (10/1) to afford a white powder in 81% yield (64.96 mg). mp 213–214 °C.  $^1\text{H}$  NMR (400 MHz,  $\text{CDCl}_3$ )  $\delta$  8.08–8.05 (m, 1H), 7.75 (d,  $J$  = 7.7 Hz, 1H), 7.56–7.50 (m, 2H), 7.48–7.46(m, 1H), 7.45–7.40 (m, 4H), 7.37–7.33 (m, 3H), 7.23–7.15 (m, 5H), 7.13–7.09

(m, 1H), 6.93 (s, 1H). <sup>13</sup>C NMR (101 MHz, CDCl<sub>3</sub>) δ 141.9, 141.0, 140.2, 138.7, 138.7, 137.6, 133.7, 132.4, 128.8, 128.5, 128.1, 128.0, 128.0, 127.4, 127.2, 124.3, 124.2, 122.3, 121.5, 120.9, 120.6, 111.1, 104.0. HRMS (EI) m/z: [M]<sup>+</sup> calcd for C<sub>28</sub>H<sub>19</sub>NS 401.1238; found 401.1239.

#### 1-(5-phenylbenzo[b]thiophen-7-yl)-2-(pyridin-3-yl)-1H-indole (67c)

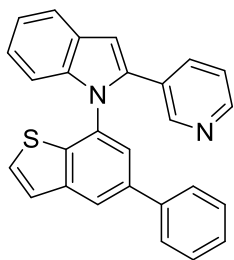

The title compound was prepared according to the general procedure and purified by column chromatography on silica gel and eluted with petroleum ether/dichloromethane (10/1) to afford a white powder in 77% yield (61.9 mg). mp 155–156 °C. <sup>1</sup>H NMR (400 MHz, CDCl<sub>3</sub>) δ 8.71 (s, 1H), 8.41 (s, 1H), 8.10 (s, 1H), 7.79 (d, *J* = 7.6 Hz, 1H), 7.57 (d, *J* = 7.2 Hz, 2H), 7.53 (d, *J* = 6.8 Hz, 2H), 7.48–7.41 (m, 4H), 7.37 (t, *J* = 7.0 Hz, 1H), 7.29–7.18 (m, 2H), 7.14 (d, *J* = 7.9 Hz, 1H), 7.06 (s, 1H), 7.01 (s, 1H). <sup>13</sup>C NMR (101 MHz, CDCl<sub>3</sub>) δ 148.7, 148.4, 142.0, 139.9, 138.9, 138.9, 137.4, 137.1, 134.6, 133.0, 128.8, 128.4, 128.3, 128.1, 127.5, 127.2, 124.4, 124.0, 122.9, 122.9, 121.9, 121.1, 120.8, 111.0, 104.9. HRMS (EI) m/z: [M]<sup>+</sup> calcd for C<sub>27</sub>H<sub>18</sub>N<sub>2</sub>S 402.1191; found 402.1195.

#### 1-(4-(1-(5-phenylbenzo[b]thiophen-7-yl)-1H-indol-2-yl)phenyl)ethan-1-one (68c)

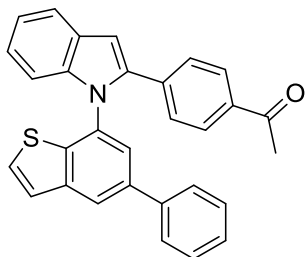

The title compound was prepared according to the general procedure and purified by column chromatography on silica gel and eluted with petroleum ether/dichloromethane (10/1) to afford a white powder in 69% yield (61.1 mg). mp 179–180 °C. <sup>1</sup>H NMR (400 MHz, CDCl<sub>3</sub>) δ 8.10 (s, 1H), 7.75 (d, *J* = 7.1 Hz, 3H), 7.56 (d, *J* = 7.2 Hz, 2H), 7.51 (s, 1H), 7.46–7.39 (m, 6H), 7.39–7.32 (m, 1H), 7.24–7.16 (m, 2H), 7.12 (d, *J* = 7.7 Hz, 1H), 7.03 (s, 1H), 2.96–2.03 (m, 3H). <sup>13</sup>C NMR (101 MHz, CDCl<sub>3</sub>) δ 197.4, 142.0, 140.0, 139.4, 139.3, 138.9, 137.5, 137.0, 135.6, 133.5, 128.9, 128.3, 128.2, 127.6, 127.2, 124.4, 123.9, 123.1, 121.7, 121.2, 121.0, 111.1, 105.6, 26.4. HRMS (EI) m/z: [M]<sup>+</sup> calcd for C<sub>30</sub>H<sub>21</sub>NOS 443.1344; found 443.1341.

#### 4-(1-(5-phenylbenzo[b]thiophen-7-yl)-1H-indol-2-yl)benzotrile (69c)

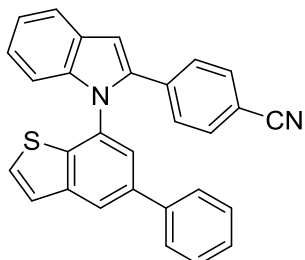

The title compound was prepared according to the general procedure and purified by column chromatography on silica gel and eluted with petroleum ether/dichloromethane (10/1) to afford a white powder in 75% yield (63.9 mg). mp 221–222 °C. <sup>1</sup>H NMR (400 MHz, CDCl<sub>3</sub>) δ 8.13 (s, 1H), 7.78 (d, *J* = 7.2 Hz, 1H), 7.58 (d, *J* = 7.2 Hz, 2H), 7.51 (s, 1H), 7.49–7.35 (m, 9H), 7.26–7.19 (m, 2H),

7.14 (d,  $J = 7.6$  Hz, 1H), 7.05 (s, 1H).  $^{13}\text{C}$  NMR (101 MHz,  $\text{CDCl}_3$ )  $\delta$  142.1, 139.8, 139.3, 139.0, 138.4, 137.3, 136.8, 133.1, 132.0, 128.9, 128.2, 128.1, 127.9, 127.6, 127.2, 124.5, 123.8, 123.5, 121.9, 121.4, 121.1, 118.6, 111.2, 110.6, 106.1. HRMS (EI)  $m/z$ :  $[\text{M}]^+$  calcd for  $\text{C}_{29}\text{H}_{18}\text{N}_2\text{S}$  426.1191; found 426.1190.

**2-(4-(tert-butyl)phenyl)-5-methyl-1-(5-phenylbenzo[b]thiophen-7-yl)-1H-indole (70c)**

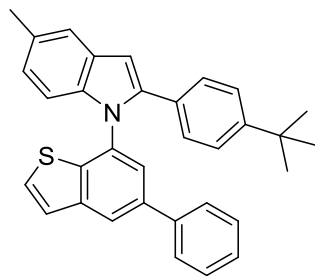

The title compound was prepared according to the general procedure and purified by column chromatography on silica gel and eluted with petroleum ether/dichloromethane (10/1) to afford a white powder in 85% yield (80.1 mg). mp 182–183 °C.  $^1\text{H}$  NMR (400 MHz,  $\text{CDCl}_3$ )  $\delta$  8.11 (s, 1H), 7.62 (s, 1H), 7.54 (d,  $J = 7.2$  Hz, 2H), 7.50–7.43 (m, 5H), 7.40 (d,  $J = 6.8$  Hz, 1H), 7.34 (d,  $J = 7.8$  Hz, 2H), 7.31–7.21 (m, 2H), 7.08 (s, 2H), 6.94 (s, 1H), 2.58 (s, 3H), 1.33 (s, 9H).  $^{13}\text{C}$  NMR (101 MHz,  $\text{CDCl}_3$ )  $\delta$  150.2, 141.7, 141.1, 140.3, 138.6, 137.5, 136.9, 134.0, 130.0, 129.6, 128.8, 128.7, 128.0, 127.7, 127.3, 127.2, 125.1, 124.3, 124.3, 123.6, 121.3, 120.2, 110.8, 103.2, 34.4, 31.1, 21.4. HRMS (EI)  $m/z$ :  $[\text{M}]^+$  calcd for  $\text{C}_{33}\text{H}_{29}\text{NS}$  471.2021; found 471.2023.

**2-(tert-butyl)-1-(5-phenylbenzo[b]thiophen-7-yl)-1H-indole (71c)**

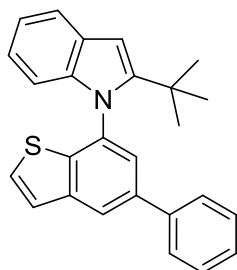

The title compound was prepared according to the general procedure and purified by column chromatography on silica gel and eluted with petroleum ether/dichloromethane (10/1) to afford a sticky pale yellow liquid in 87% yield (66.3 mg).  $^1\text{H}$  NMR (400 MHz,  $\text{CDCl}_3$ )  $\delta$  8.19 (s, 1H), 7.75–7.69 (m, 3H), 7.65 (d,  $J = 7.7$  Hz, 1H), 7.53–7.44 (m, 4H), 7.40 (t,  $J = 7.1$  Hz, 1H), 7.13 (t,  $J = 7.3$  Hz, 1H), 7.03 (t,  $J = 7.6$  Hz, 1H), 6.69–6.55 (m, 2H), 1.31 (s, 9H).  $^{13}\text{C}$  NMR (101 MHz,  $\text{CDCl}_3$ )  $\delta$  150.2, 141.6, 140.1, 139.7, 139.3, 138.5, 135.1, 128.9, 128.0, 127.5, 127.3, 127.2, 126.2, 124.2, 122.1, 121.4, 120.1, 119.8, 110.1, 100.2, 33.3, 30.6. HRMS (EI)  $m/z$ :  $[\text{M}]^+$  calcd for  $\text{C}_{26}\text{H}_{23}\text{NS}$  381.1551; found 381.1550.

**2-(tert-butyl)-1-(5-hexylbenzo[b]thiophen-7-yl)-1H-indole (72c)**

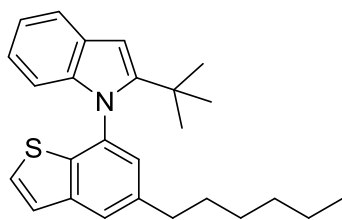

The title compound was prepared according to the general procedure and purified by column chromatography on silica gel and eluted with petroleum ether/dichloromethane (10/1) to afford a yellow liquid in 80% yield (62.3 mg).  $^1\text{H}$  NMR (400 MHz,  $\text{CDCl}_3$ )  $\delta$  7.76 (s, 1H), 7.63 (d,  $J = 7.8$  Hz, 1H), 7.40–7.34 (m, 2H), 7.30 (s, 1H), 7.17–7.07 (m, 1H), 7.05–6.97 (m, 1H), 6.62–6.51 (m, 2H), 2.85–2.76 (m, 2H), 1.78–1.67

(m, 2H), 1.39–1.29 (m, 6H), 1.28–1.24 (m, 9H), 0.94–0.87 (m, 3H).  $^{13}\text{C}$  NMR (101 MHz,  $\text{CDCl}_3$ )  $\delta$  150.2, 141.3, 140.0, 139.2, 138.1, 134.4, 127.7, 127.3, 127.3, 123.7, 123.3, 121.3, 120.0, 119.8, 110.1, 100.0, 35.6, 33.3, 31.6, 31.5, 30.6, 28.8, 22.5, 14.0. HRMS (EI)  $m/z$ :  $[\text{M}]^+$  calcd for  $\text{C}_{26}\text{H}_{31}\text{NS}$  389.2177; found 389.2172.

#### 2-cyclopropyl-1-(5-hexylbenzo[b]thiophen-7-yl)-1H-indole (73c)

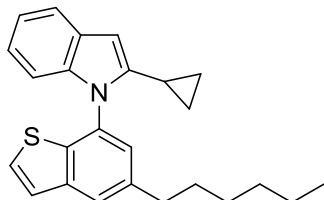

The title compound was prepared according to the general procedure and purified by column chromatography on silica gel and eluted with petroleum ether/dichloromethane (10/1) to afford a yellow liquid in 82% yield (61.2 mg).

$^1\text{H}$  NMR (400 MHz,  $\text{CDCl}_3$ )  $\delta$  7.75 (s, 1H), 7.60 (d,  $J = 7.7$  Hz, 1H), 7.40 (dd,  $J = 12.4, 5.4$  Hz, 2H), 7.12 (t,  $J = 7.4$  Hz, 1H), 7.05 (t,  $J = 7.5$  Hz, 1H), 6.89 (d,  $J = 8.0$  Hz, 1H), 2.81 (t,  $J = 7.6$  Hz, 2H), 1.77–1.67 (m, 2H), 1.67–1.58 (m, 1H), 1.41–1.29 (m, 6H), 0.94–0.85 (m, 3H), 0.85–0.66 (m, 4H).  $^{13}\text{C}$  NMR (101 MHz,  $\text{CDCl}_3$ )  $\delta$  144.1, 141.5, 140.3, 137.6, 136.6, 132.4, 128.1, 127.2, 125.8, 123.9, 122.9, 120.9, 120.0, 119.8, 110.1, 97.4, 35.6, 31.7, 31.6, 28.8, 22.5, 14.0, 8.5, 8.0, 7.4. HRMS (EI)  $m/z$ :  $[\text{M}]^+$  calcd for  $\text{C}_{25}\text{H}_{27}\text{NS}$  373.1864; found 373.1863.

#### 1-(5-hexylbenzo[b]thiophen-7-yl)-2-phenyl-1H-indole (74c)

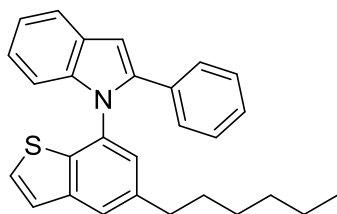

The title compound was prepared according to the general procedure and purified by column chromatography on silica gel and eluted with petroleum ether/dichloromethane (10/1) to afford a sticky pale yellow liquid in 84% yield

(68.7 mg).  $^1\text{H}$  NMR (400 MHz,  $\text{CDCl}_3$ )  $\delta$  7.74 (d,  $J = 7.6$  Hz, 1H), 7.65 (s, 1H), 7.38 (d,  $J = 5.4$  Hz, 1H), 7.33 (d,  $J = 5.4$  Hz, 1H), 7.29–7.24 (m, 2H), 7.23–7.12 (m, 5H), 7.05 (d,  $J = 8.0$  Hz, 1H), 7.00 (s, 1H), 6.90 (s, 1H), 2.67 (t,  $J = 7.5$  Hz, 2H), 1.57–1.50 (m, 2H), 1.30–1.19 (m, 6H), 0.88 (t,  $J = 6.7$  Hz, 3H).  $^{13}\text{C}$  NMR (101 MHz,  $\text{CDCl}_3$ )  $\delta$  141.5, 141.0, 140.2, 138.6, 136.0, 133.0, 132.5, 128.5, 128.0, 128.0, 127.3, 125.8, 123.8, 122.7, 122.1, 120.7, 120.5, 111.1, 103.7, 35.5, 31.6, 31.4, 28.5, 22.5, 14.0. HRMS (EI)  $m/z$ :  $[\text{M}]^+$  calcd for  $\text{C}_{28}\text{H}_{27}\text{NS}$  409.1864; found 409.1866.

### 2-phenyl-1-(3-(p-tolyl)naphthalen-1-yl)-1H-pyrrolo[2,3-c]pyridine (75c)

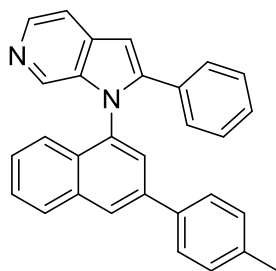

The title compound was prepared according to the general procedure and purified by column chromatography on silica gel and eluted with petroleum ether/ethyl acetate(5/1) to afford a light yellow solid in 85% yield (69.7 mg). mp 199–200 °C.

<sup>1</sup>H NMR (400 MHz, CDCl<sub>3</sub>) δ 8.42–8.24 (m, 2H), 8.14 (s, 1H), 7.98 (d, *J* = 8.1 Hz, 1H), 7.65 (s, 1H), 7.58–7.44 (m, 3H), 7.37 (s, 2H), 7.30 (d, *J* = 6.7 Hz, 2H), 7.26–7.20 (m, 2H), 7.20–7.09 (m, 3H), 6.94 (s, 1H), 2.39 (s, 3H). <sup>13</sup>C NMR (101 MHz, CDCl<sub>3</sub>) δ 145.5, 139.6, 138.2, 137.7, 136.7, 134.6, 134.4, 134.3, 133.0, 131.3, 129.8, 129.6, 128.6, 128.5, 128.3, 128.3, 127.2, 127.1, 127.0, 126.5, 126.4, 122.8, 114.7, 102.3, 21.0. HRMS (EI) *m/z*: [M]<sup>+</sup> calcd for C<sub>30</sub>H<sub>22</sub>N<sub>2</sub> 410.1783; found 410.1785.

### 2-phenyl-1-(5-phenylbenzo[b]thiophen-7-yl)-1H-pyrrolo[2,3-c]pyridine(76c)

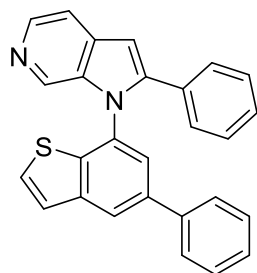

The title compound was prepared according to the general procedure and purified by column chromatography on silica gel and eluted with petroleum ether/dichloromethane (10/1) to afford a white powder in 79% yield (63.5 mg). mp 149–150 °C. <sup>1</sup>H NMR

(400 MHz, CDCl<sub>3</sub>) δ 8.50 (s, 1H), 8.37 (s, 1H), 8.10 (s, 1H), 7.64 (s, 1H), 7.52 (d, *J* = 7.2 Hz, 2H), 7.47 (s, 1H), 7.46–7.39 (m, 4H), 7.38–7.32 (m, 3H), 7.24–7.17(m, 3H), 6.90 (s, 1H). <sup>13</sup>C NMR (101 MHz, CDCl<sub>3</sub>) δ 144.3, 142.1, 139.9, 138.9, 137.2, 134.1, 133.4, 132.4, 131.3, 128.8, 128.4, 128.3, 128.1, 127.6, 127.2, 124.5, 124.0, 122.1, 103.0. HRMS (EI) *m/z*: [M]<sup>+</sup> calcd for C<sub>27</sub>H<sub>18</sub>N<sub>2</sub>S 402.1191; found 402.1193.

### 2-phenyl-1-(5-phenylbenzofuran-7-yl)-1H-pyrrolo[2,3-c]pyridine (77c)

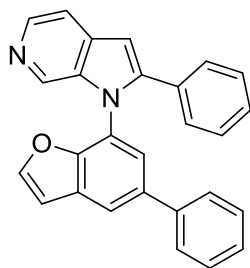

The title compound was prepared according to the general procedure and purified by column chromatography on silica gel and eluted with petroleum ether/dichloromethane (10/1) to afford a white powder in 85% yield (65.6 mg). mp 135–136 °C. <sup>1</sup>H NMR (400

MHz, CDCl<sub>3</sub>) δ 8.57 (s, 1H), 8.41–8.32 (m, 1H), 7.84 (s, 1H), 7.65–7.60 (m, 1H), 7.53 (s, 1H), 7.48–7.44 (m, 2H), 7.44–7.38 (m, 3H), 7.37–7.31 (m, 3H), 7.29–7.21 (m, 3H), 6.95–6.81 (m, 2H). <sup>13</sup>C NMR (101 MHz, CDCl<sub>3</sub>) δ 149.0, 146.3, 144.6, 140.2, 139.9, 137.3, 135.6, 134.1, 133.4, 131.4, 130.0, 128.8, 128.6, 128.3, 128.2, 127.3, 127.3, 123.4, 121.9, 119.7, 114.8, 107.2, 103.0. HRMS (EI) *m/z*: [M]<sup>+</sup> calcd for C<sub>27</sub>H<sub>18</sub>N<sub>2</sub>O 386.1419; found 386.1418.

### 1-(5-(pyridin-3-yl)benzo[b]thiophen-7-yl)-2-(thiophen-2-yl)-1H-pyrrolo[2,3-c]pyridine (78c)

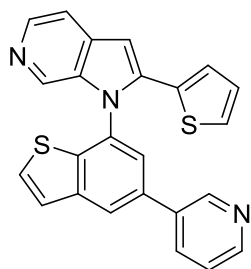

The title compound was prepared according to the general procedure and purified by column chromatography on silica gel and eluted with petroleum ether/dichloromethane (10/1) to afford a white powder in 59% yield (48.3 mg). mp 136–136 °C. <sup>1</sup>H NMR (400 MHz, CDCl<sub>3</sub>) δ 8.86 (s, 1H), 8.80–8.20 (m, 3H), 8.16–8.13 (m, 1H), 7.84 (d, *J* = 7.9 Hz, 1H), 7.70–7.55 (m, 1H), 7.50–7.47 (m, 3H), 7.35 (s, 1H), 7.17 (dd, *J* = 5.1, 2.9 Hz,

1H), 7.03 (dd, *J* = 5.1, 1.2 Hz, 1H), 6.95–6.93 (m, 1H), 6.90 (s, 1H). <sup>13</sup>C NMR (101 MHz, CDCl<sub>3</sub>) δ 148.7, 148.2, 142.2, 139.9, 139.1, 135.6, 134.4, 133.1, 132.7, 131.4, 129.5, 129.5, 128.8, 128.3, 127.1, 125.8, 125.7, 124.4, 123.6, 123.6, 122.5, 102.2. HRMS (EI) *m/z*: [M]<sup>+</sup> calcd for C<sub>24</sub>H<sub>15</sub>N<sub>3</sub>S<sub>2</sub> 409.0707; found 409.0710.

### 1-(6-methoxy-2,7-dimethyl-3-phenylnaphthalen-1-yl)-2-phenyl-1H-indole (79c)

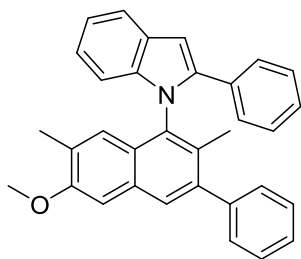

The title compound was prepared according to the general procedure and purified by column chromatography on silica gel and eluted with petroleum ether/dichloromethane(10/1) to afford a white powder in 85% yield (77.0 mg). mp 188–189 °C. The ee (40% ee) of **79c** was determined by HPLC analysis using a Daicel CHIRALPACK OD column; 1% *i*-Pr-OH in hexane; flow rate, 1.0 mL/min;

35 °C; retention times: 6.1 min (minor), 7.1 min (major). <sup>1</sup>H NMR (400 MHz, CDCl<sub>3</sub>) δ 7.77 (d, *J* = 7.8 Hz, 1H), 7.71 (s, 1H), 7.43–7.31 (m, 3H), 7.30–7.25 (m, 4H), 7.23–7.06 (m, 7H), 6.99 (s, 1H), 6.79 (d, *J* = 8.1 Hz, 1H), 3.94 (s, 3H), 2.20 (s, 3H), 1.68 (s, 3H). <sup>13</sup>C NMR (101 MHz, CDCl<sub>3</sub>) δ 157.0, 141.9, 141.6, 140.9, 138.9, 132.8, 132.7, 132.3, 131.1, 130.1, 129.3, 128.3, 128.1, 128.0, 127.8, 127.6, 127.3, 127.0, 126.6, 124.2, 122.2, 120.4, 120.4, 111.2, 104.5, 102.3, 55.3, 17.1, 15.8. HRMS (EI) *m/z*: [M]<sup>+</sup> calcd for C<sub>33</sub>H<sub>27</sub>NO 453.2093; found 453.2092.

#### Racemic:

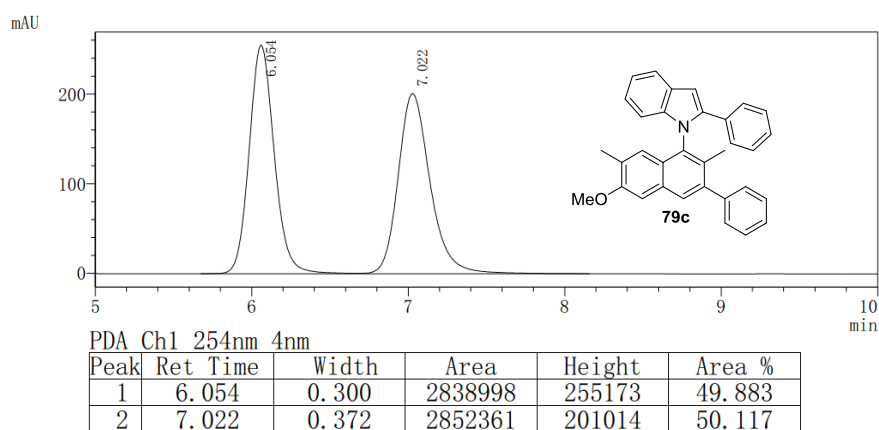

**Enantioselective:**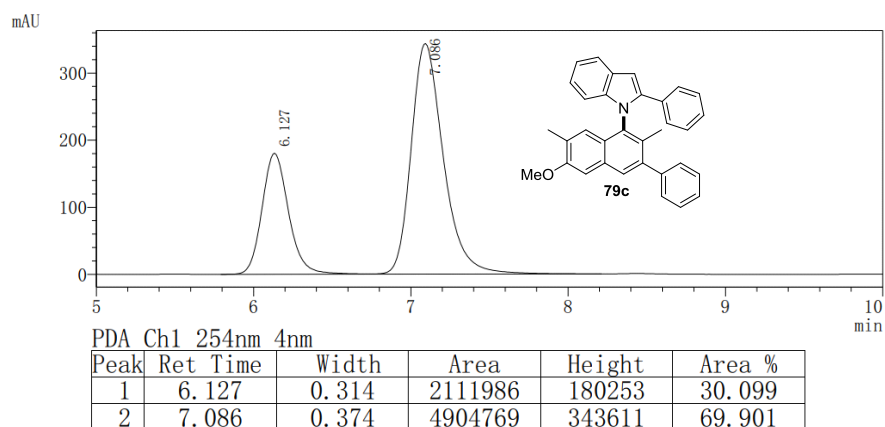**1-(6-methoxy-2,7-dimethyl-3-phenylnaphthalen-1-yl)-2-(o-tolyl)-1H-indole (80c)**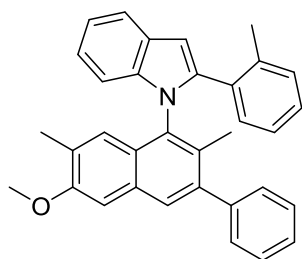

The title compound was prepared according to the general procedure and purified by column chromatography on silica gel and eluted with petroleum ether/dichloromethane(10/1) to afford a white powder in 70% yield (65.4 mg). mp 197–198 °C. The ee (56% ee) of **80c** was determined by HPLC analysis using a Daicel CHIRALPACK OD column; 1% *i*-Pr-OH in hexane; flow rate, 1.0 mL/min;

35 °C; retention times: 9.2 min (minor), 10.0 min (major). <sup>1</sup>H NMR (400 MHz, CDCl<sub>3</sub>) δ 7.82 (d, *J* = 7.7 Hz, 1H), 7.64 (s, 1H), 7.46–7.40 (m, 2H), 7.40–7.34 (m, 1H), 7.31 (d, *J* = 7.4 Hz, 2H), 7.25–7.12 (m, 3H), 7.10–7.04 (m, 2H), 7.01 (s, 1H), 6.94 (d, *J* = 7.7 Hz, 1H), 6.90–6.80 (m, 3H), 3.92 (m, 3H), 2.54 (s, 3H), 2.23 (s, 3H), 1.86 (s, 3H). <sup>13</sup>C NMR (101 MHz, CDCl<sub>3</sub>) δ 156.8, 141.7, 140.6, 140.2, 137.9, 136.7, 132.2, 132.1, 131.7, 130.9, 130.4, 129.9, 129.5, 129.2, 128.0, 127.9, 127.5, 126.9, 126.6, 124.7, 124.3, 121.9, 120.2, 120.2, 111.2, 104.4, 55.2, 20.9, 16.9, 16.3. HRMS (EI) *m/z*: [M]<sup>+</sup> calcd for C<sub>34</sub>H<sub>29</sub>NO 467.2249; found 467.2247.

**Racemic:**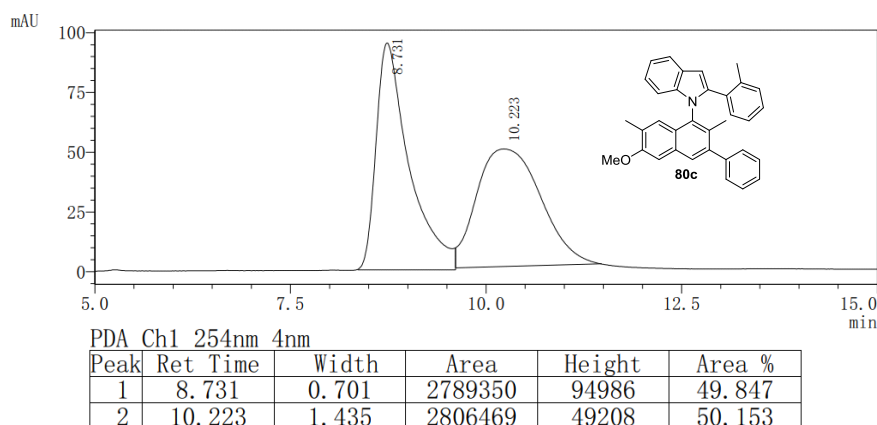



**Enantioselective:**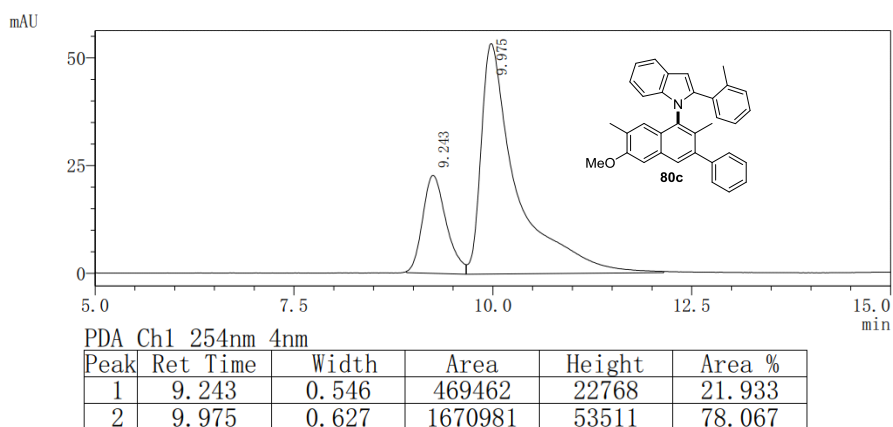**1-(3-chlorophenyl)-1-(6-methoxy-2,7-dimethyl-3-phenylnaphthalen-1-yl)-1H-indole (81c)**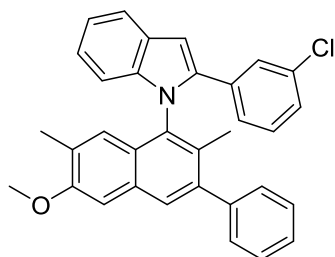

The title compound was prepared according to the general procedure and purified by column chromatography on silica gel and eluted with petroleum ether/dichloromethane(10/1) to afford a white powder in 75% yield (73.1 mg). mp 185–186 °C. The ee (43%) of **81c** was determined by HPLC analysis using a Daicel CHIRALPACK OD column; 1% *i*-Pr-OH in hexane; flow rate, 1.0

mL/min; 35 °C; retention times: 9.0 min (minor), 9.6 min (major). <sup>1</sup>H NMR (400 MHz, CDCl<sub>3</sub>) δ 7.78 (d, *J* = 7.8 Hz, 1H), 7.73 (s, 1H), 7.47–7.40 (m, 2H), 7.39–7.30 (m, 4H), 7.21 (t, *J* = 7.3 Hz, 1H), 7.16–7.09 (m, 3H), 7.06–6.99 (m, 3H), 6.97 (s, 1H), 6.81 (d, *J* = 8.0 Hz, 1H), 3.94 (s, 3H), 2.19 (s, 3H), 1.73 (s, 3H). <sup>13</sup>C NMR (101 MHz, CDCl<sub>3</sub>) δ 157.0, 141.5, 140.9, 140.0, 139.0, 134.4, 133.9, 132.3, 131.1, 130.2, 129.3, 128.1, 128.0, 128.0, 127.6, 127.2, 127.0, 126.4, 125.3, 123.8, 122.7, 120.6, 111.2, 104.6, 103.0, 55.3, 17.1, 15.7. HRMS (EI) *m/z*: [M]<sup>+</sup> calcd for C<sub>33</sub>H<sub>26</sub>ClNO 487.1703; found 487.1701.

**Racemic:**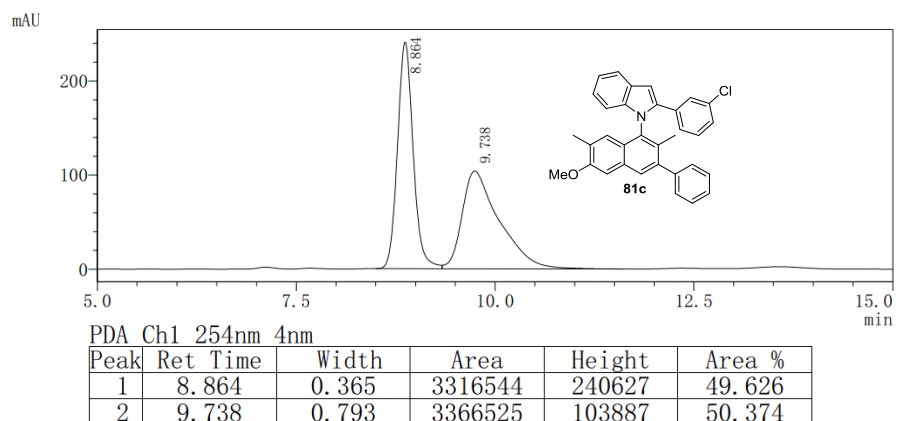

**Enantioselective:**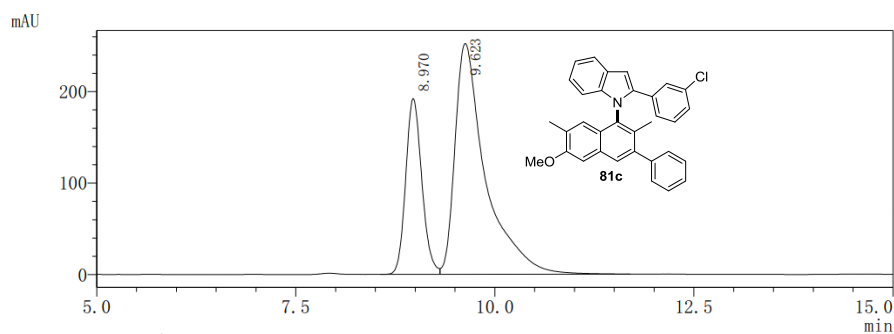

| Peak | Ret Time | Width | Area    | Height | Area % |
|------|----------|-------|---------|--------|--------|
| 1    | 8.970    | 0.380 | 2715769 | 191907 | 28.776 |
| 2    | 9.623    | 0.601 | 6721864 | 252377 | 71.224 |

**3-methyl-2-phenyl-1H-inden-1-one (1p)<sup>15</sup>**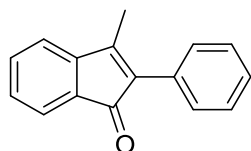

The title compound was prepared according to the general procedure and purified by column chromatography on silica gel and eluted with petroleum ether/dichloromethane(20/1) to afford a sticky yellow liquid. <sup>1</sup>H NMR (400 MHz, CDCl<sub>3</sub>) δ 7.47 (d, *J* = 7.0 Hz, 1H), 7.44–7.36 (m, 5H), 7.35–7.30 (m, 1H), 7.27–7.20 (m, 1H), 7.14 (d, *J* = 7.1 Hz, 1H), 2.30 (s, 3H). <sup>13</sup>C NMR (101 MHz, CDCl<sub>3</sub>) δ 196.3, 154.6, 145.8, 133.5, 133.4, 131.1, 130.3, 129.5, 128.8, 128.2, 127.6, 122.0, 119.3, 12.5.

**1-(2-aminophenyl)-2-(p-tolyl)ethan-1-one (1g)<sup>16</sup>**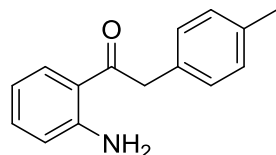

The title compound was prepared according to the general procedure and purified by column chromatography on silica gel and eluted with petroleum ether/dichloromethane(10/1) to afford a crystalline white solid. <sup>1</sup>H NMR (400 MHz, CDCl<sub>3</sub>) δ 7.84 (d, *J* = 8.1 Hz, 1H), 7.28–7.22 (m, 1H), 7.14 (s, 4H), 6.69–6.57 (m, 2H), 6.28 (s, 2H), 4.22 (s, 2H), 2.33 (s, 3H). <sup>13</sup>C NMR (101 MHz, CDCl<sub>3</sub>) δ 200.1, 150.8, 136.2, 134.3, 132.2, 131.5, 129.2, 129.2, 117.5, 117.3, 115.7, 45.6, 21.0. HRMS (EI) *m/z*: [M]<sup>+</sup> calcd for C<sub>15</sub>H<sub>15</sub>NO 225.1154.

**2-(4-(4-methylbenzyl)-3-(p-tolyl)quinolin-2-yl)aniline (1h)<sup>3</sup>**

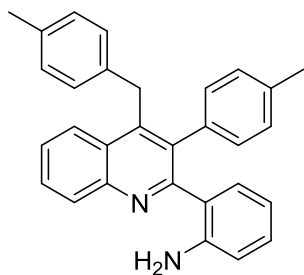

The title compound was prepared according to the general procedure and purified by column chromatography on silica gel and eluted with petroleum ether/dichloromethane(10/1) to afford a light yellow solid, mp 200-201 °C. <sup>1</sup>H NMR (400 MHz, CDCl<sub>3</sub>) δ 8.19 (d, *J* = 8.4 Hz, 1H), 7.96 (d, *J* = 8.4 Hz, 1H), 7.69 (t, *J* = 7.5 Hz, 1H), 7.48 (t, *J* = 7.5 Hz, 1H), 7.09–6.97 (m, 7H), 6.94 (d, *J* = 7.4 Hz, 2H), 6.80 (d, *J* = 7.5 Hz, 1H), 6.71 (d, *J* = 8.0 Hz, 1H), 6.48 (t, *J* = 7.4 Hz, 1H), 4.39 (s, 2H), 4.29 (s, 2H), 2.30 (d, *J* = 12.8 Hz, 6H). <sup>13</sup>C NMR (101 MHz, CDCl<sub>3</sub>) δ 158.7, 146.8, 144.8, 144.6, 137.0, 136.5, 135.8, 135.3,

## 10. Copies of $^1\text{H}$ , $^{13}\text{C}$ and $^{19}\text{F}$ NMR Spectra of the Products

### $^1\text{H}$ NMR Spectrum of **1c**

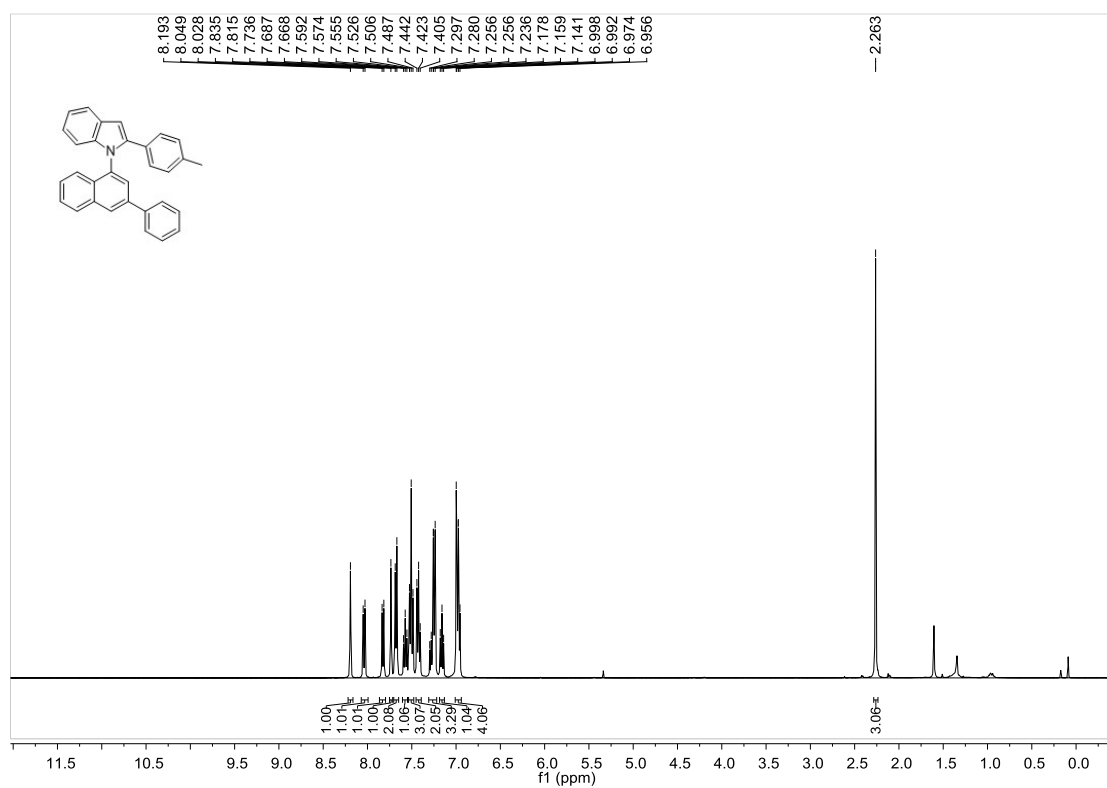

### $^{13}\text{C}$ NMR Spectrum of **1c**

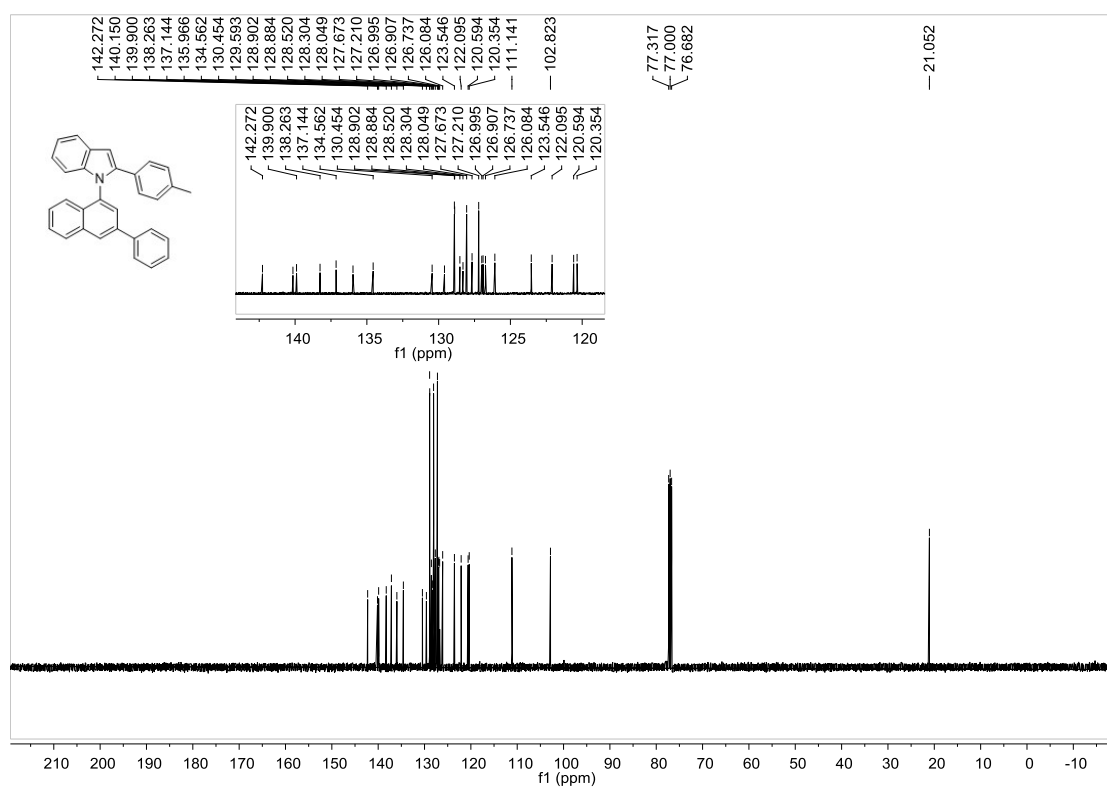

### <sup>1</sup>H NMR Spectrum of **2c**

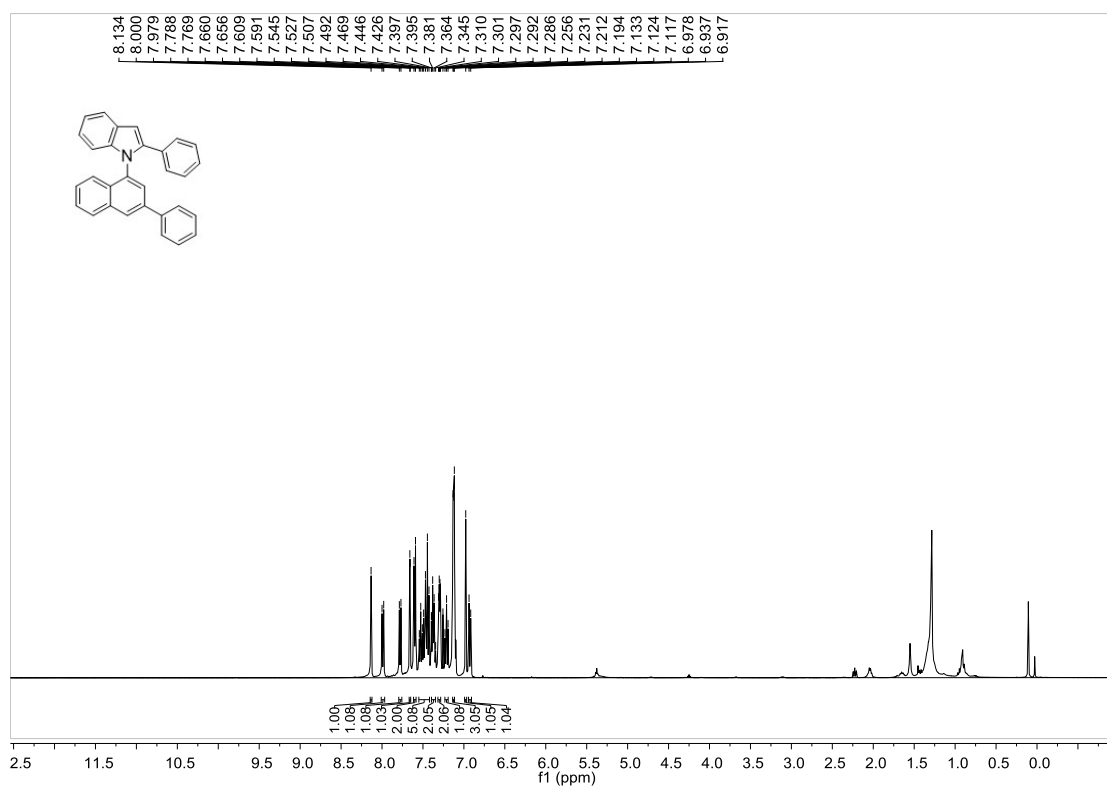

### <sup>13</sup>C NMR Spectrum of **2c**

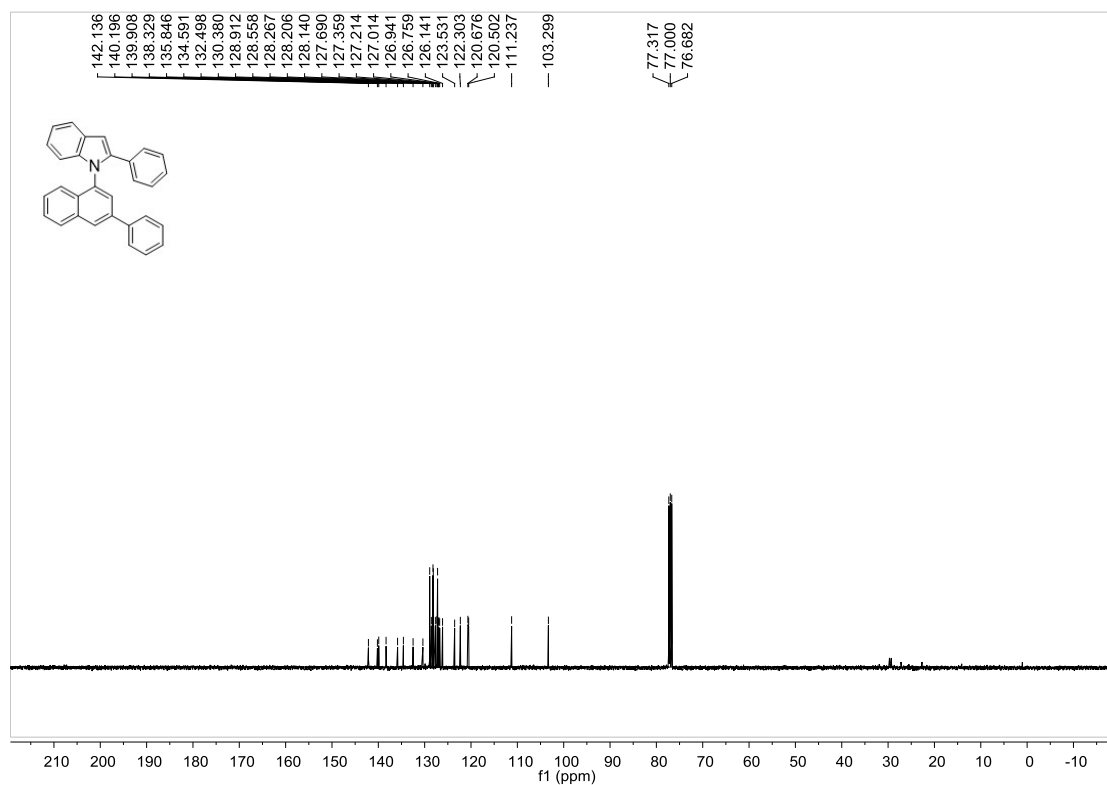

### <sup>1</sup>H NMR Spectrum of **3c**

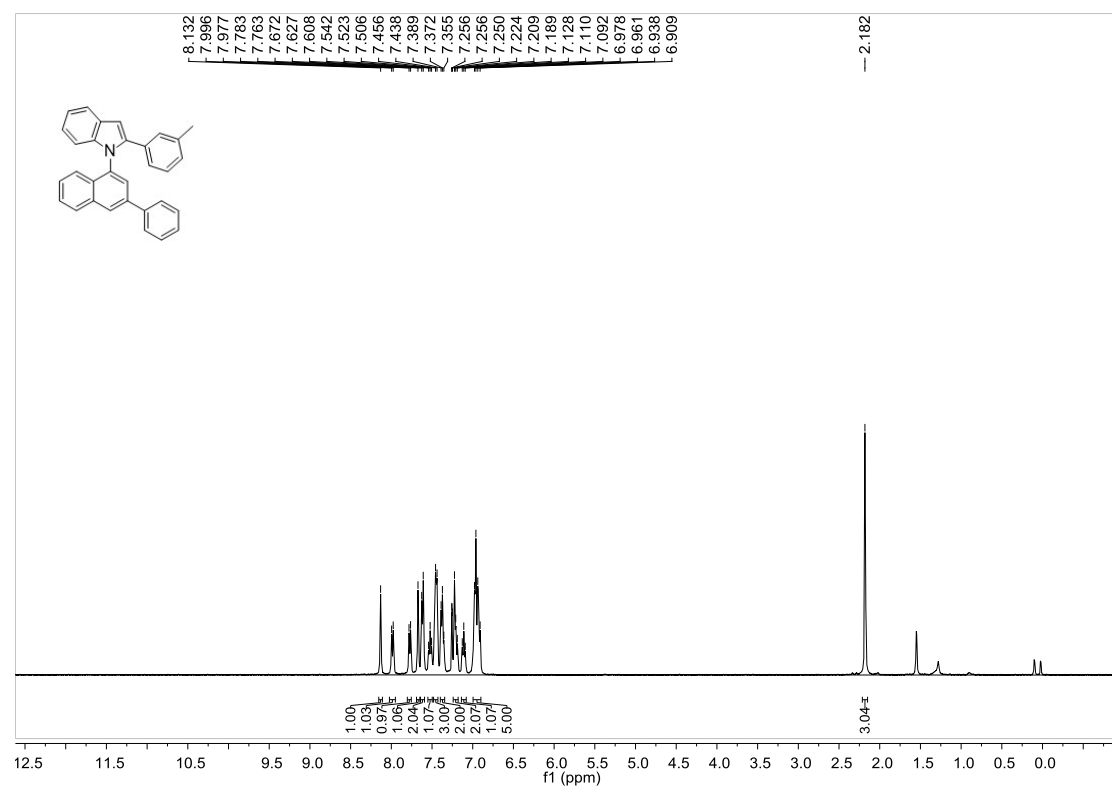

### <sup>13</sup>C NMR Spectrum of **3c**

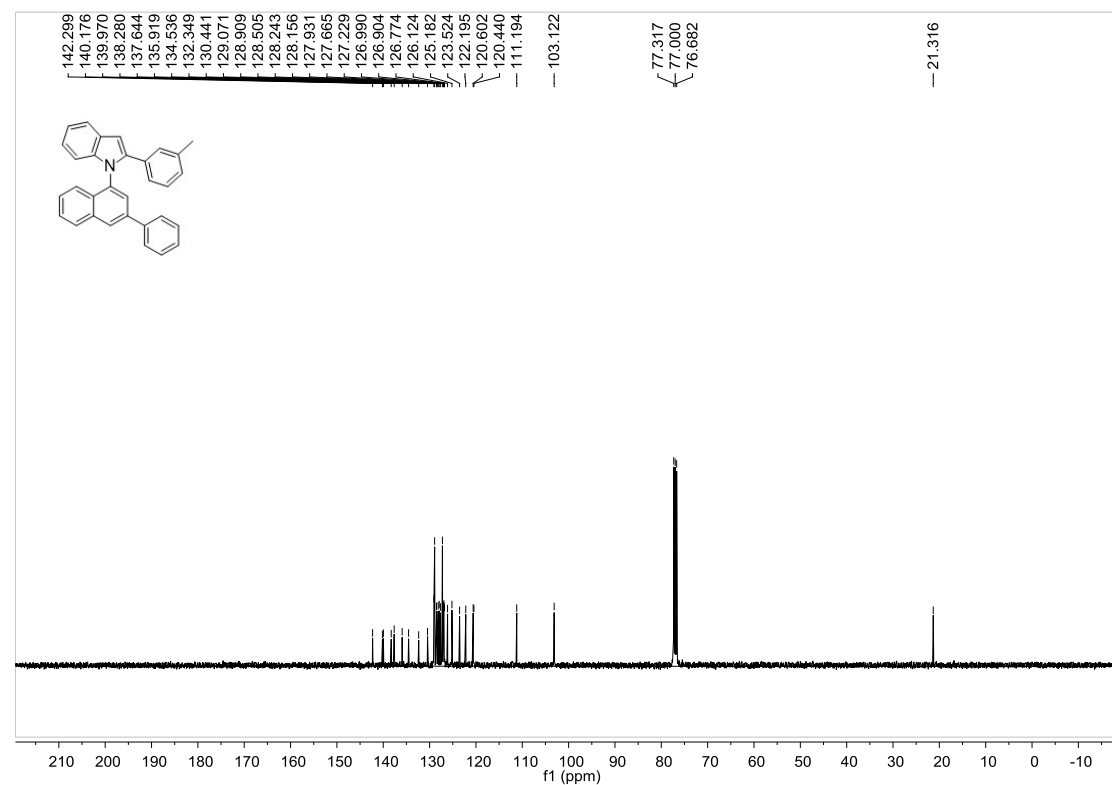

### <sup>1</sup>H NMR Spectrum of **4c**

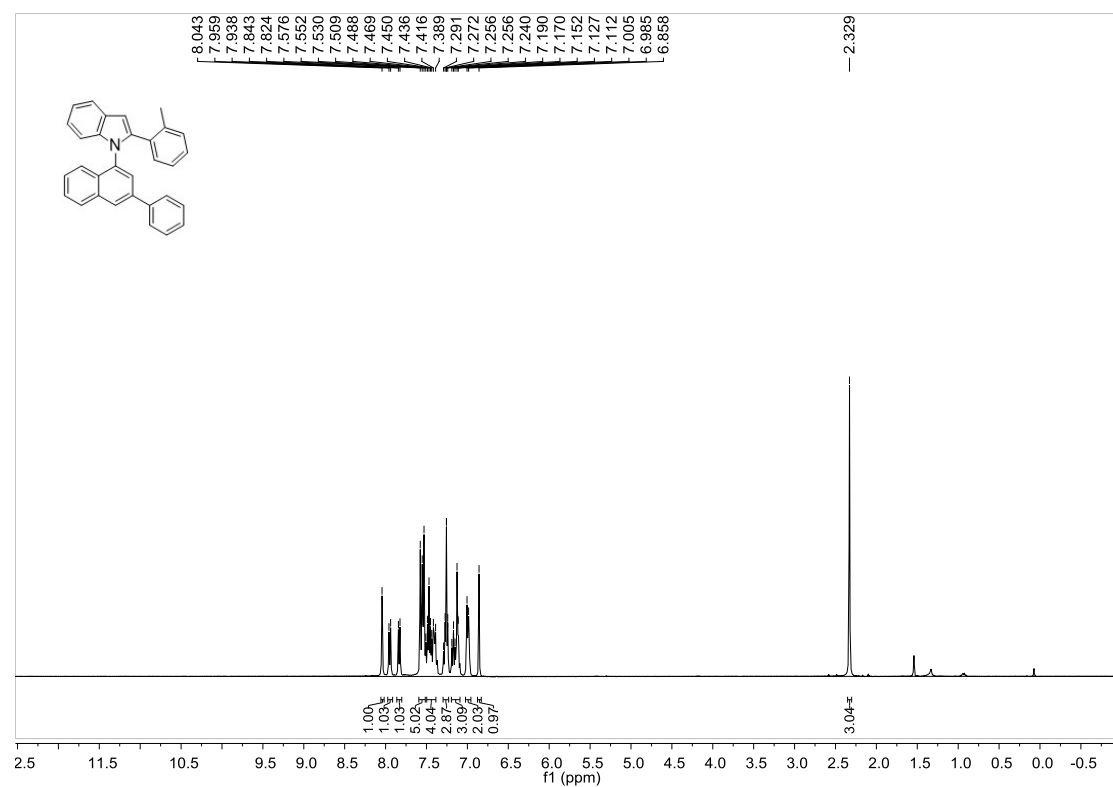

### <sup>13</sup>C NMR Spectrum of **4c**

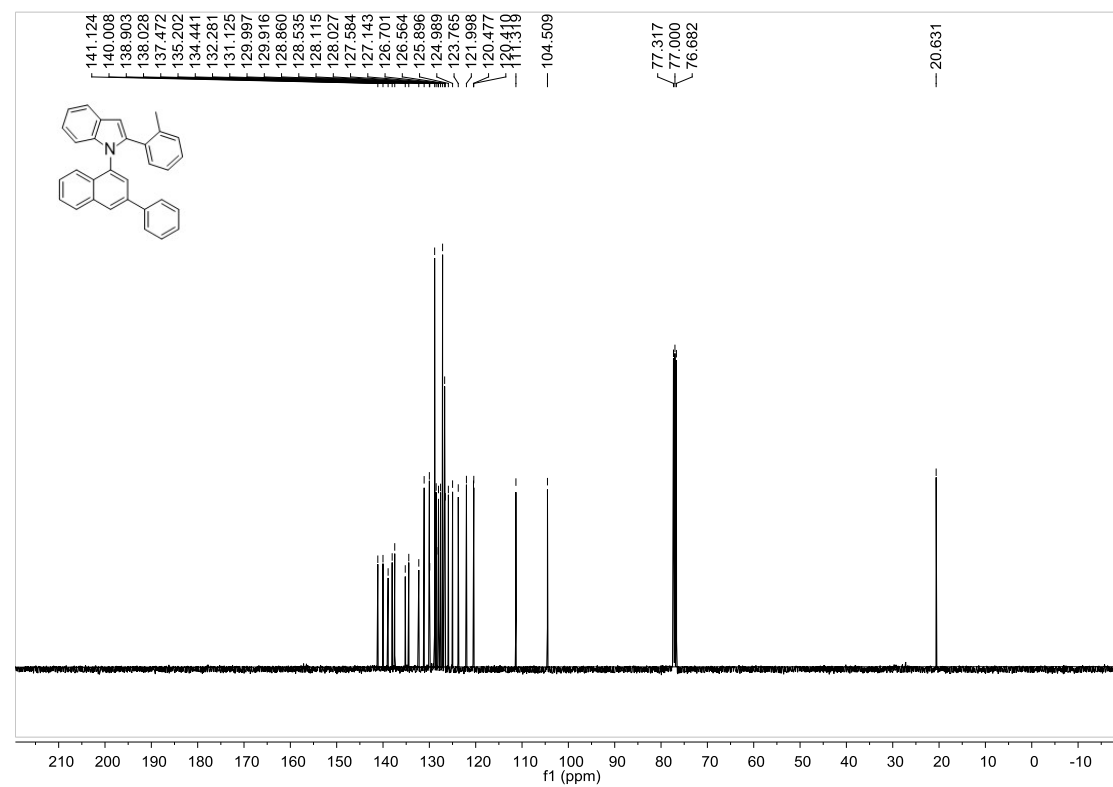

### <sup>1</sup>H NMR Spectrum of **5c**

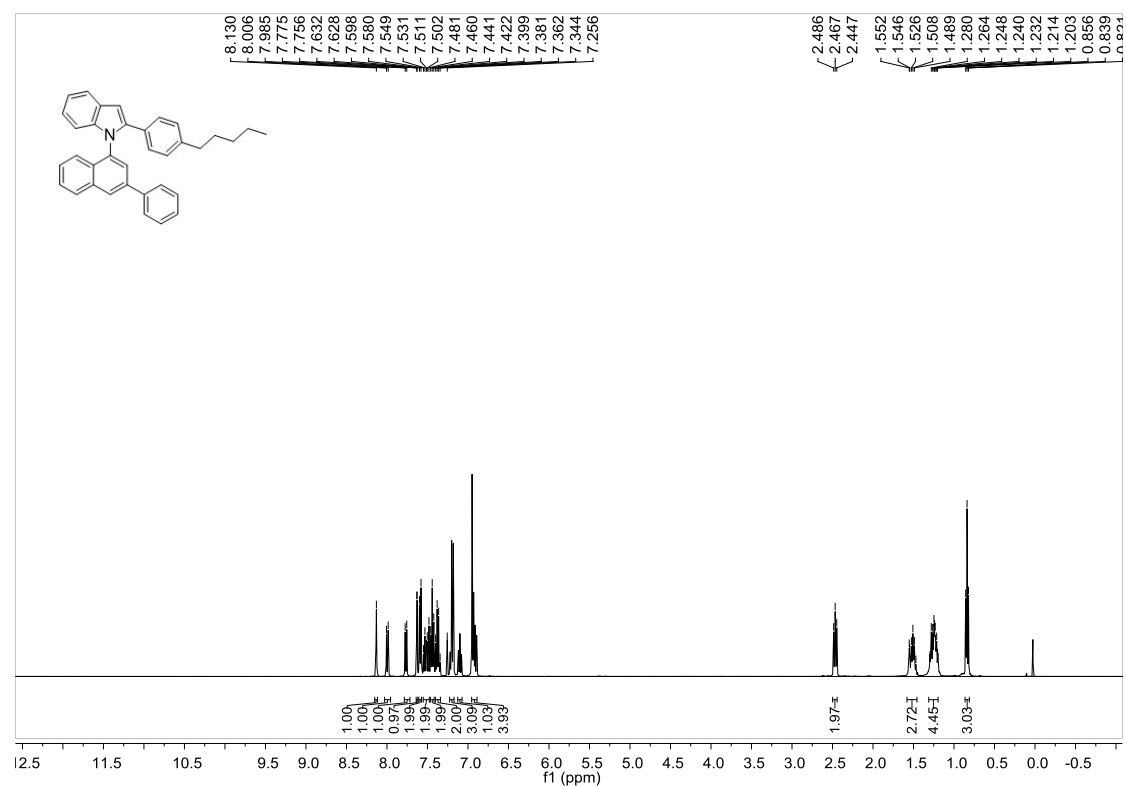

### <sup>13</sup>C NMR Spectrum of **5c**

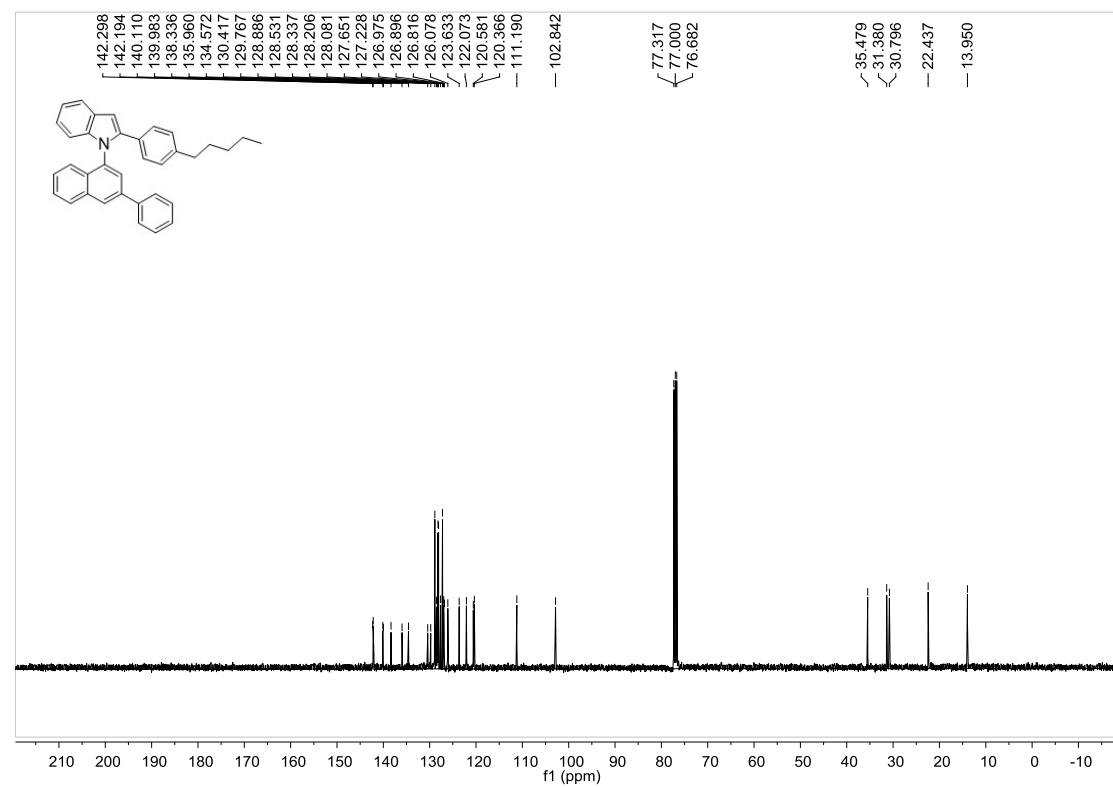



### <sup>1</sup>H NMR Spectrum of **6c**

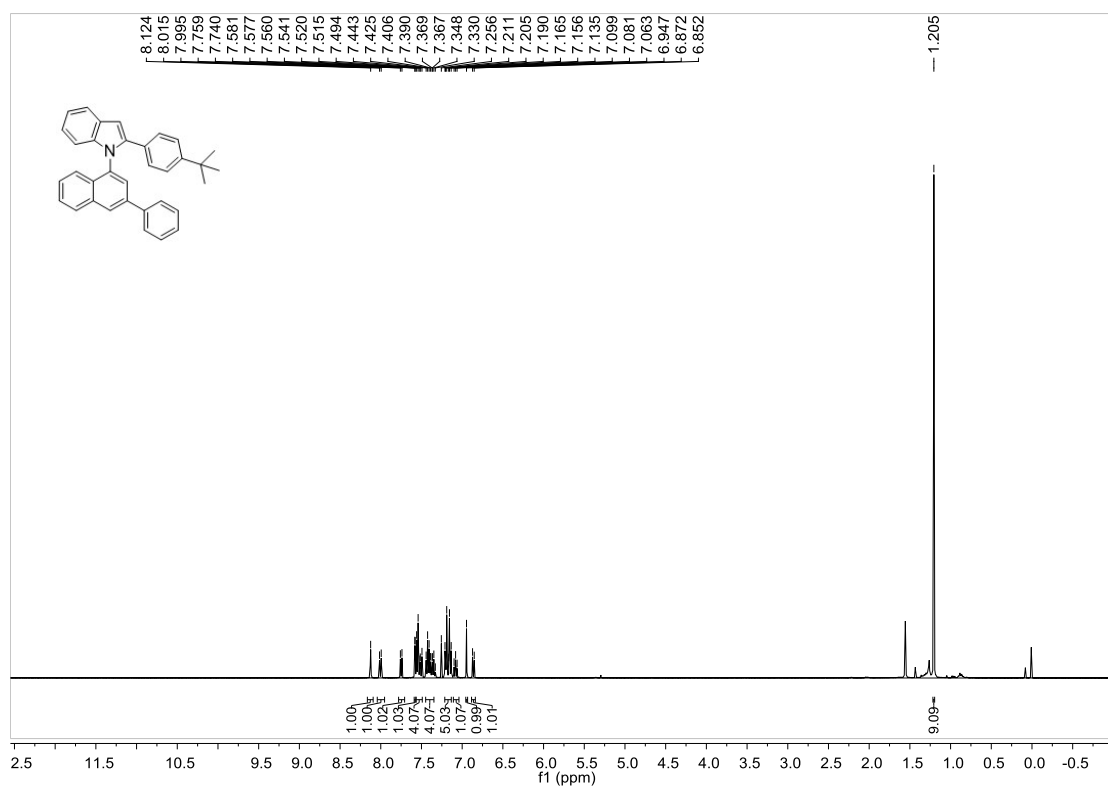

### <sup>13</sup>C NMR Spectrum of **6c**

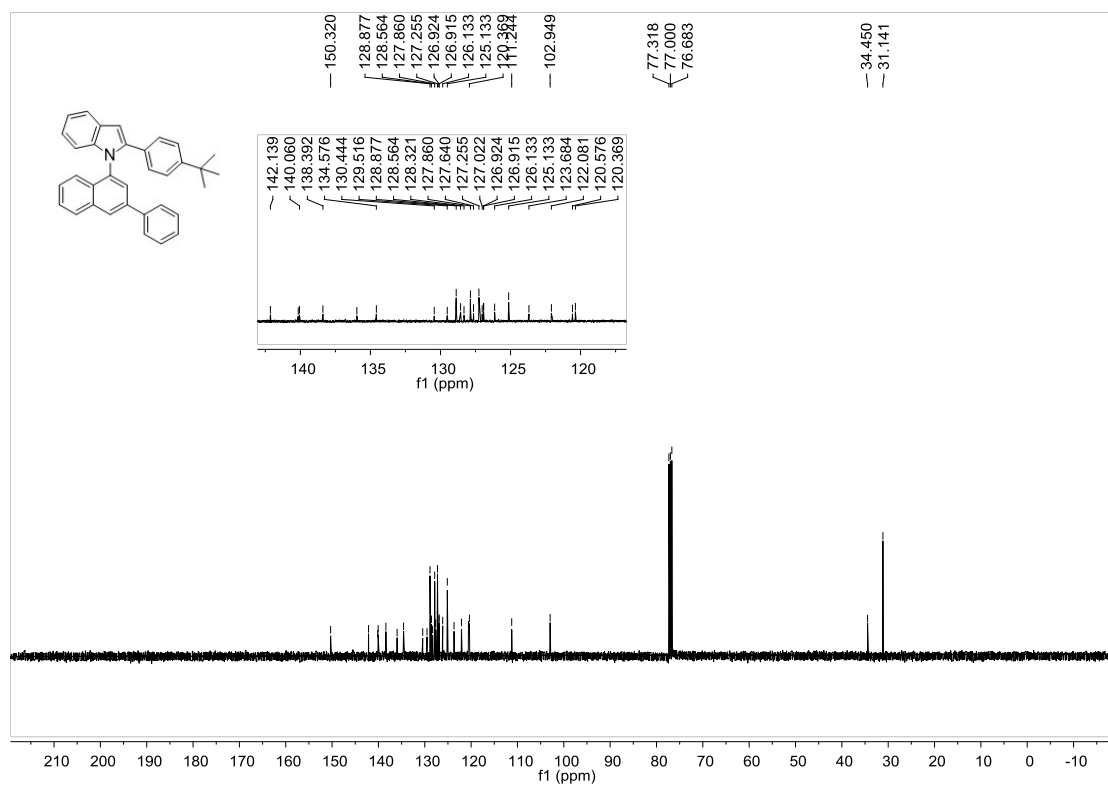

### <sup>1</sup>H NMR Spectrum of **7c**

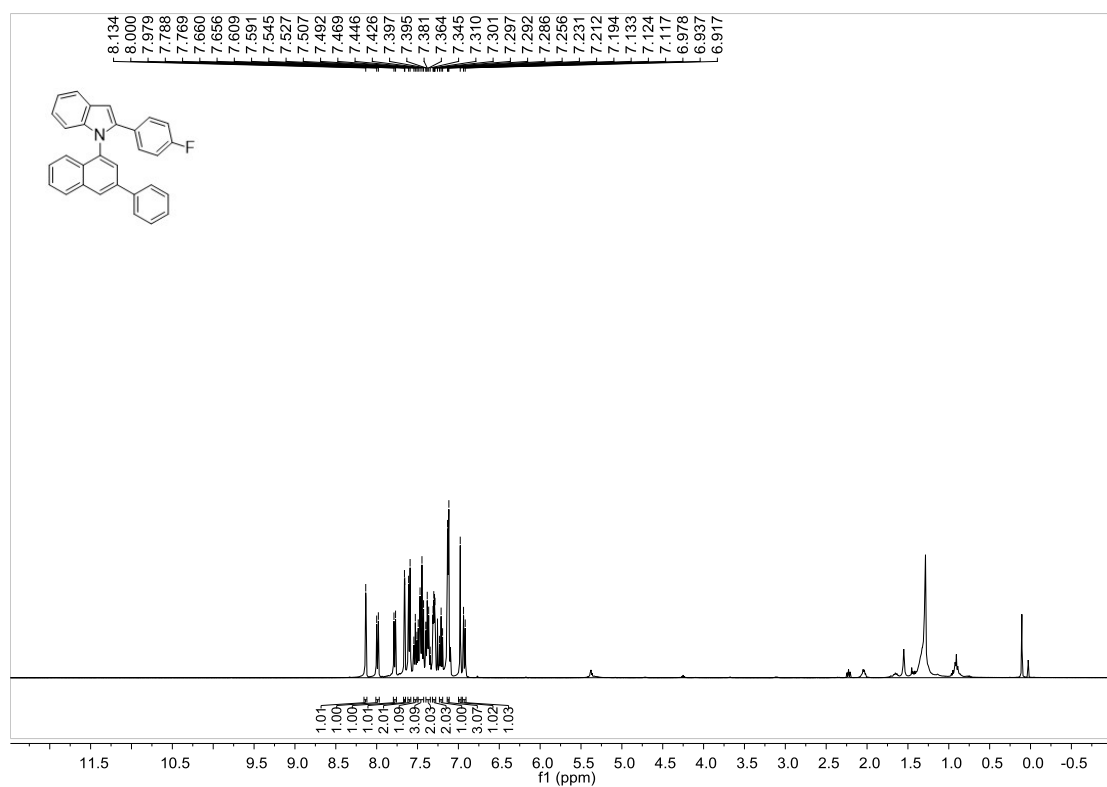

### <sup>13</sup>C NMR Spectrum of **7c**

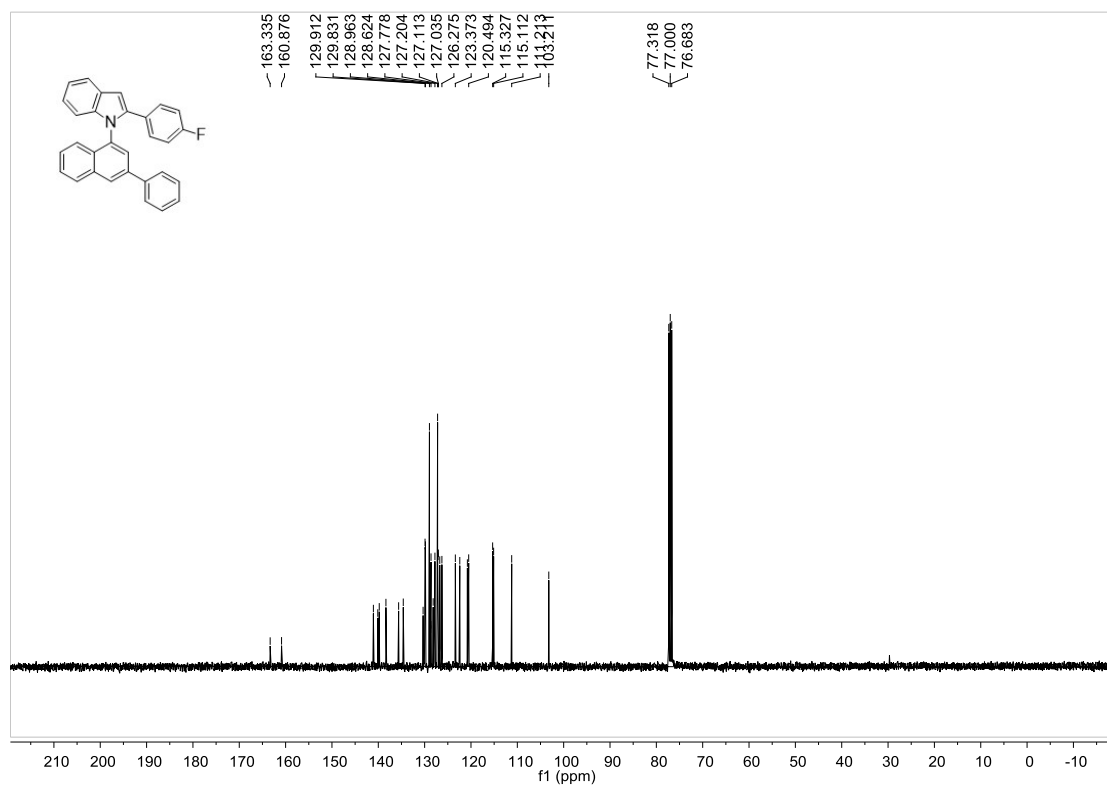

<sup>19</sup>F NMR Spectrum of **7c**

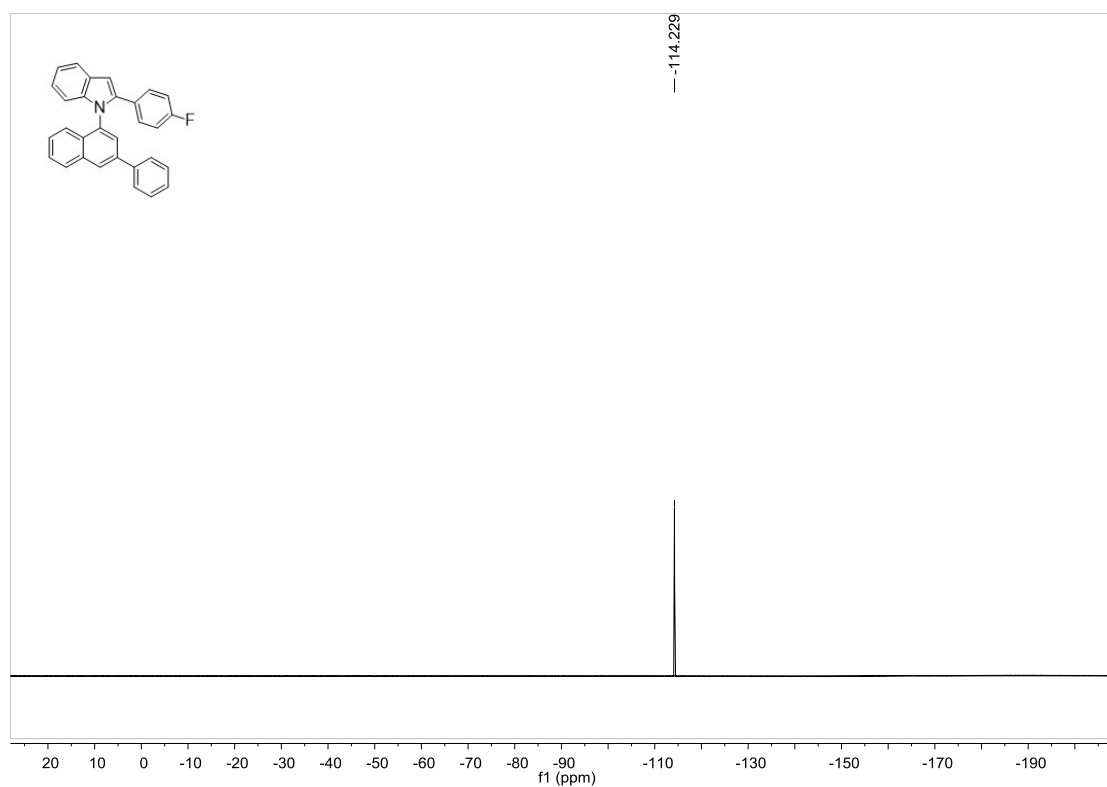

<sup>1</sup>H NMR Spectrum of **8c**

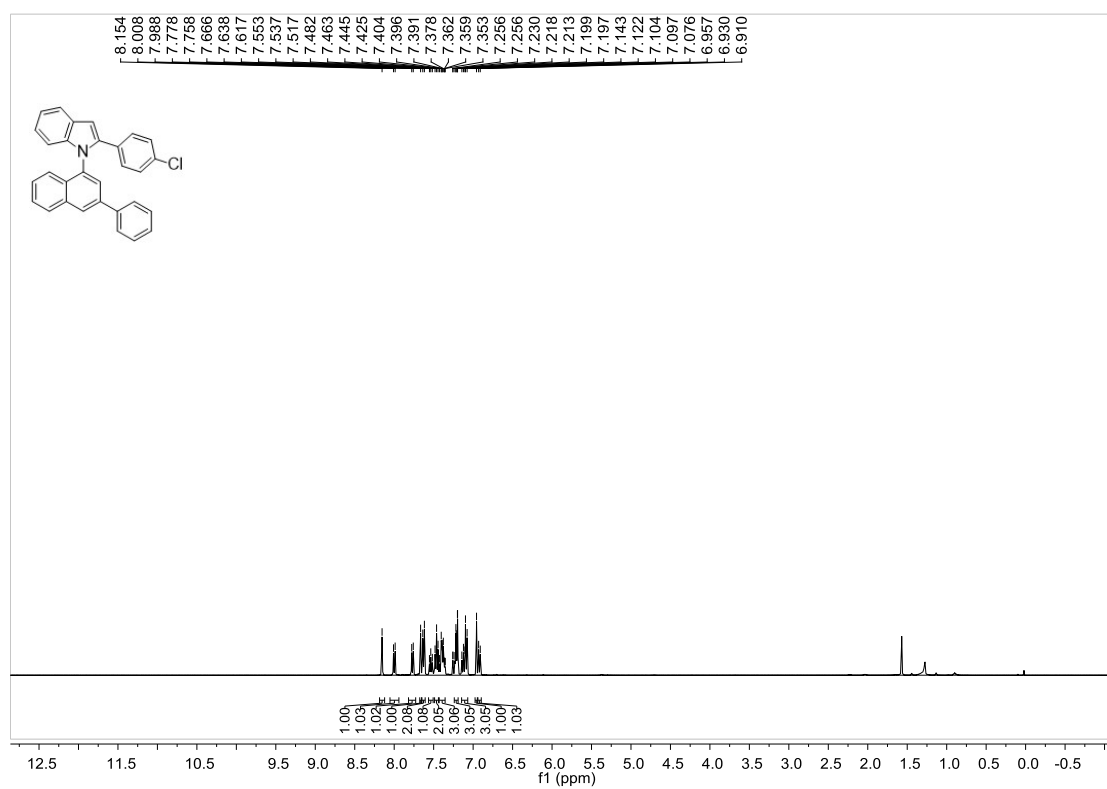

### <sup>13</sup>C NMR Spectrum of **8c**

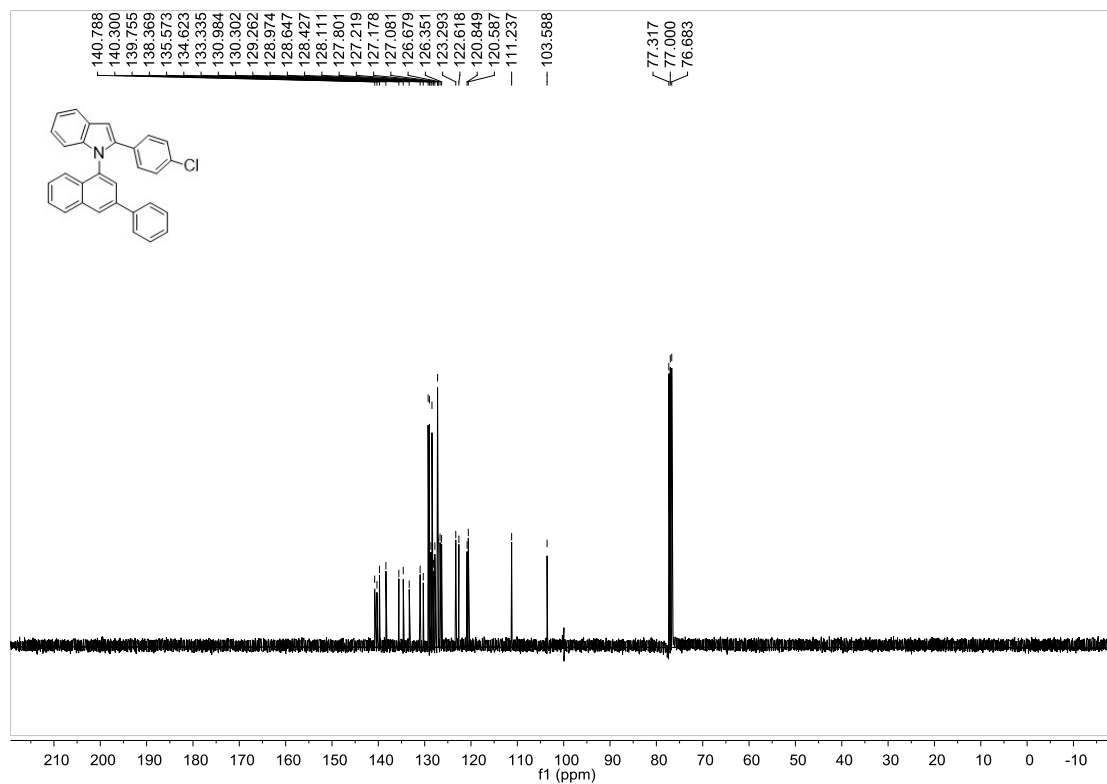

### <sup>1</sup>H NMR Spectrum of **9c**

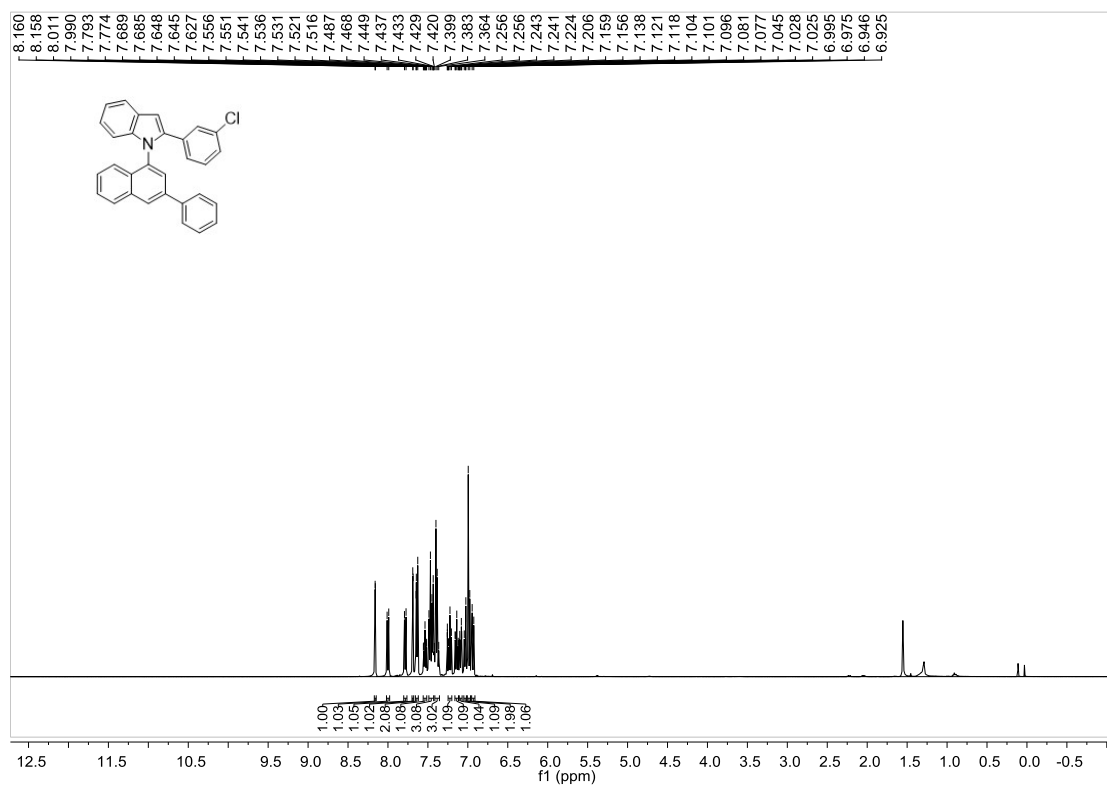

### <sup>13</sup>C NMR Spectrum of **9c**

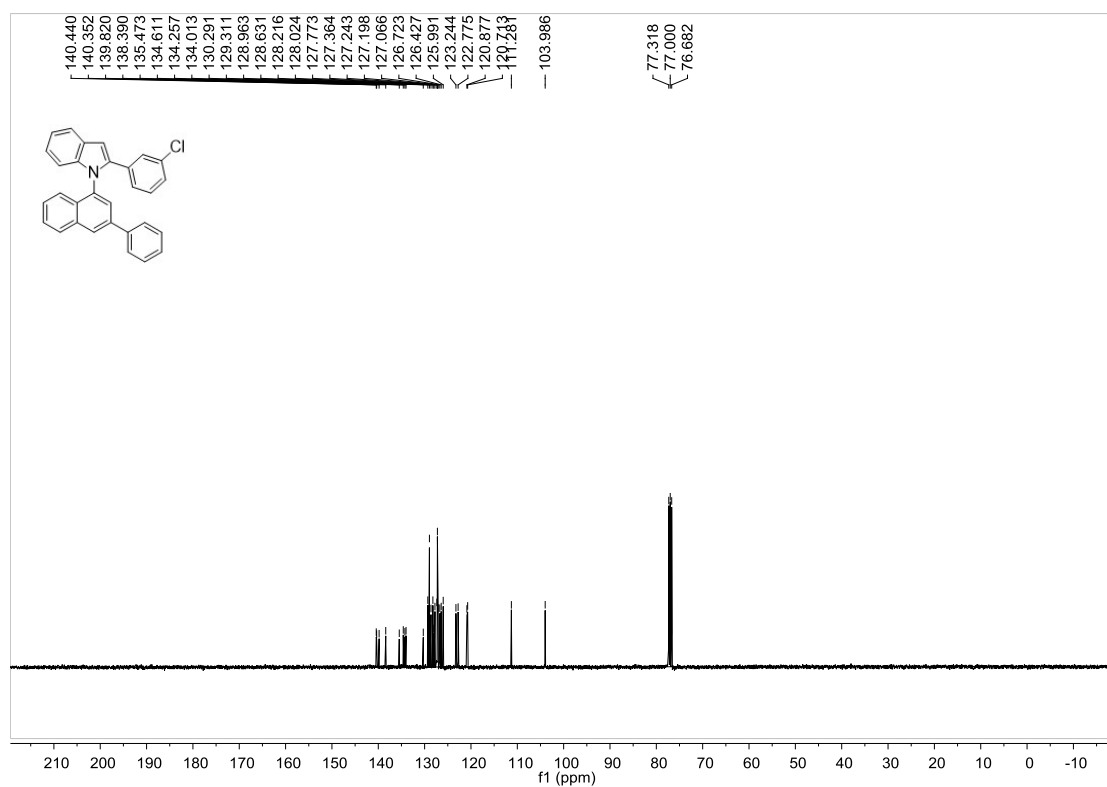

### <sup>1</sup>H NMR Spectrum of **10c**

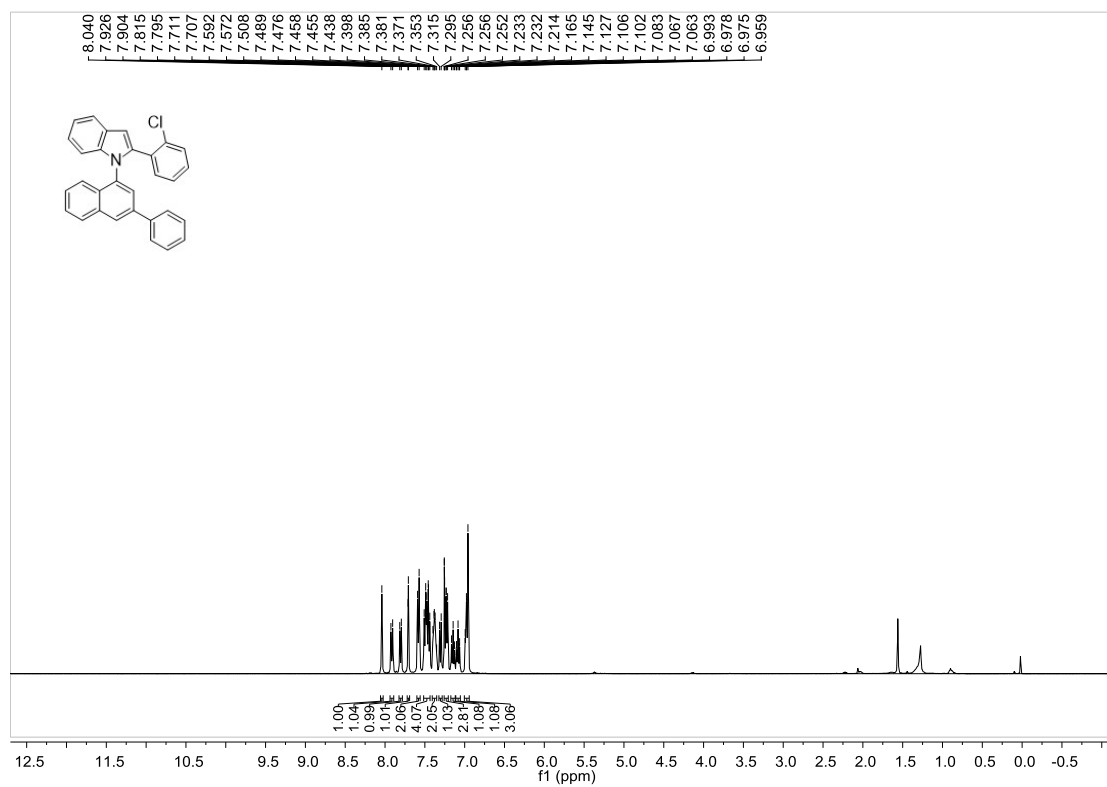

### <sup>13</sup>C NMR Spectrum of 10c

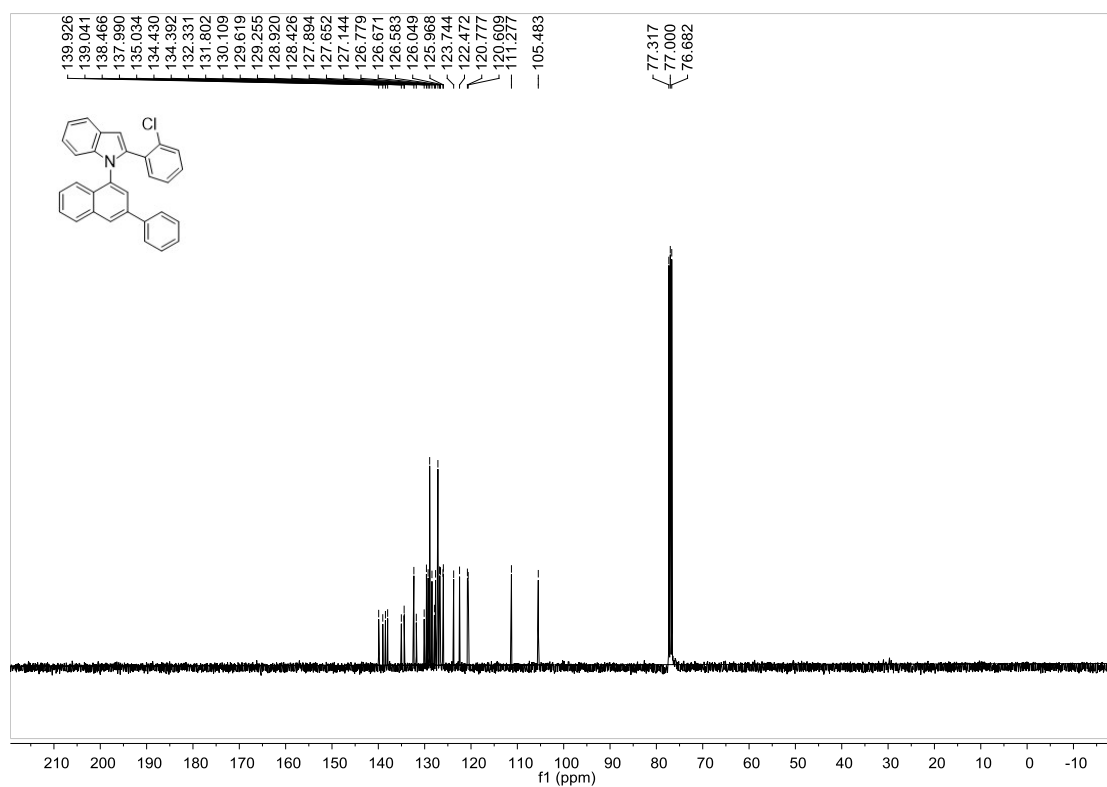

### <sup>1</sup>H NMR Spectrum of 11c

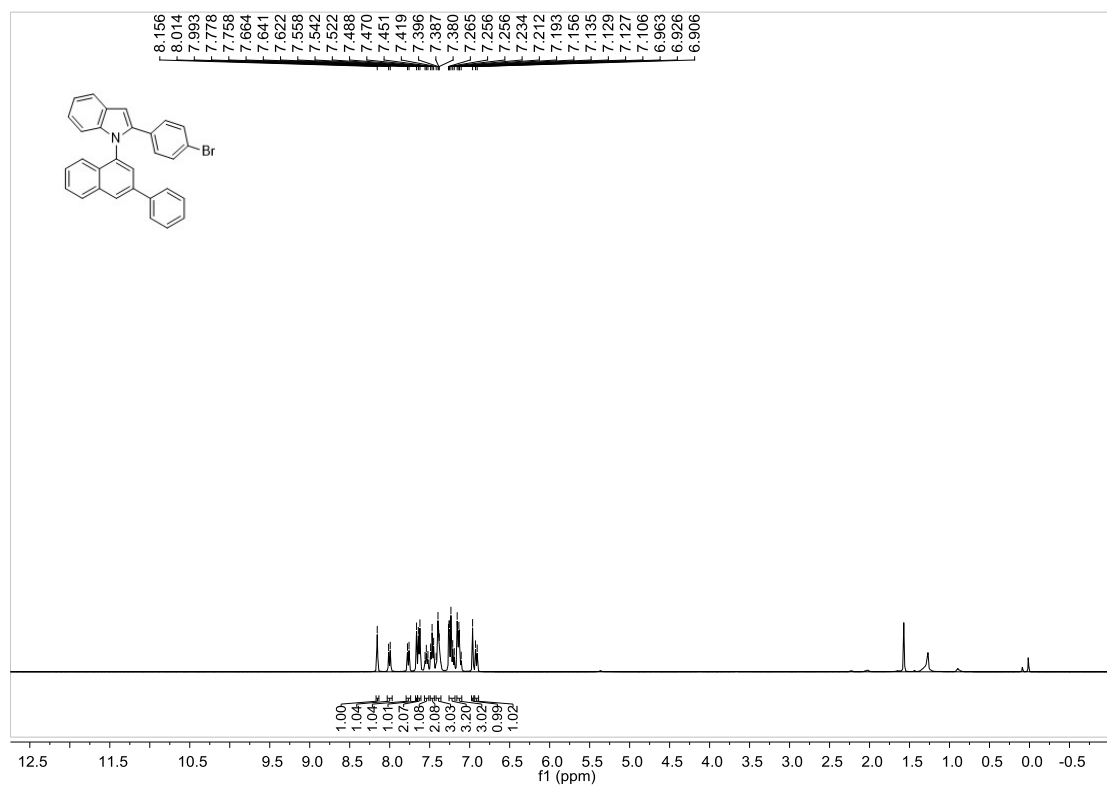

### <sup>13</sup>C NMR Spectrum of **11c**

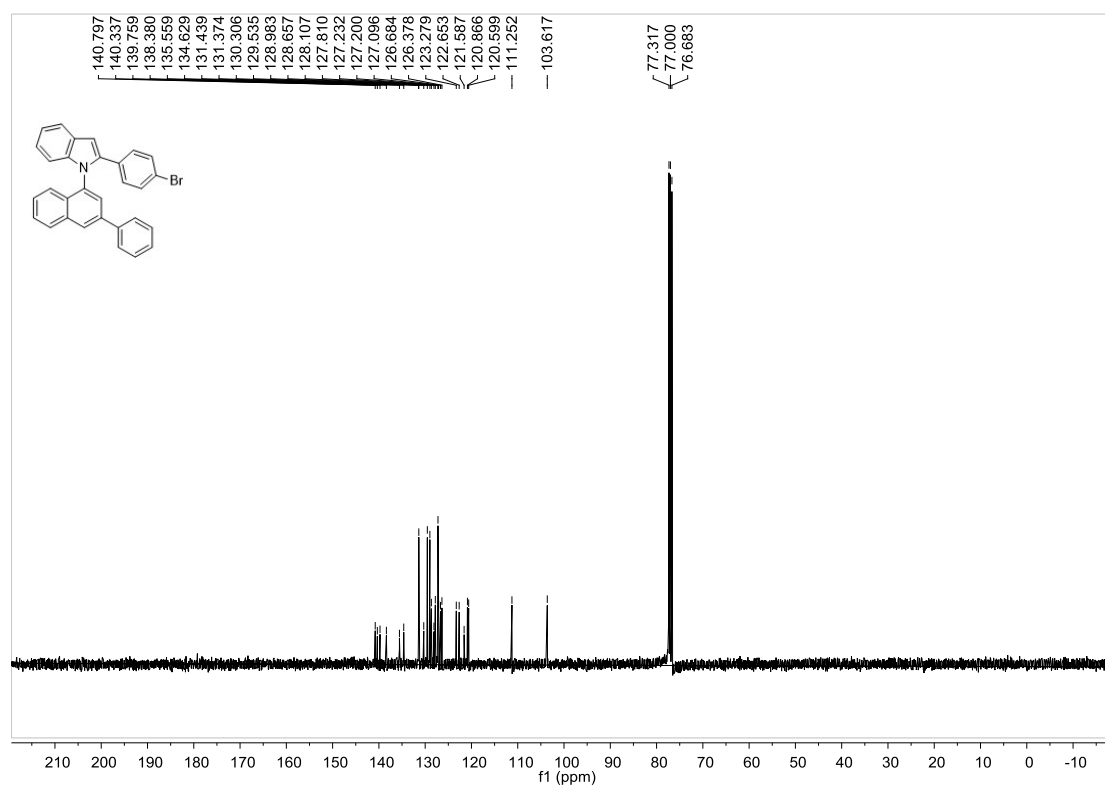

### <sup>1</sup>H NMR Spectrum of **12c**

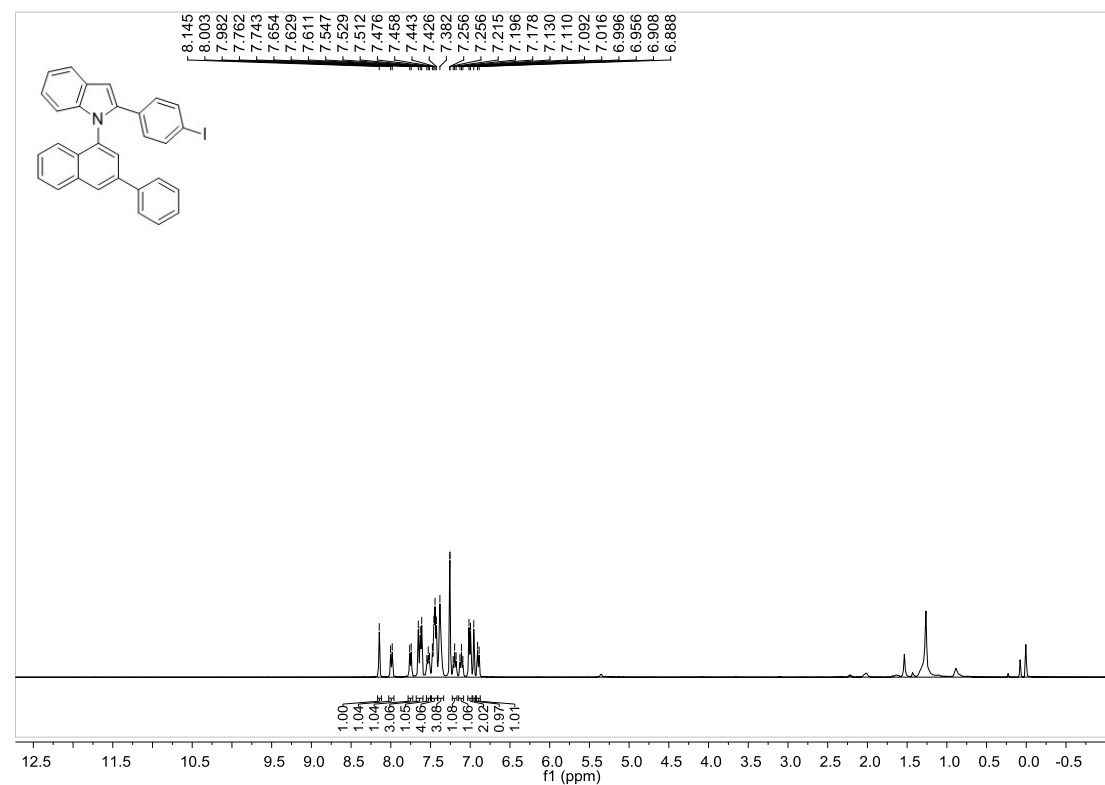

### <sup>13</sup>C NMR Spectrum of **12c**

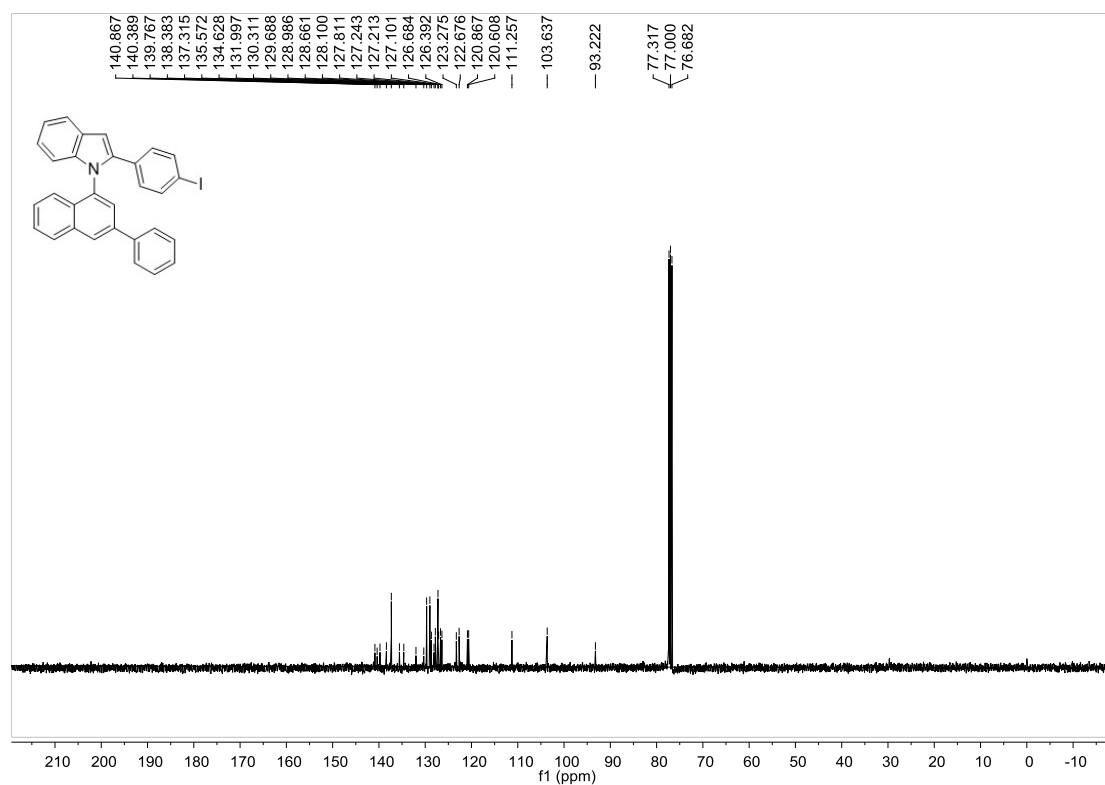

### <sup>1</sup>H NMR Spectrum of **13c**

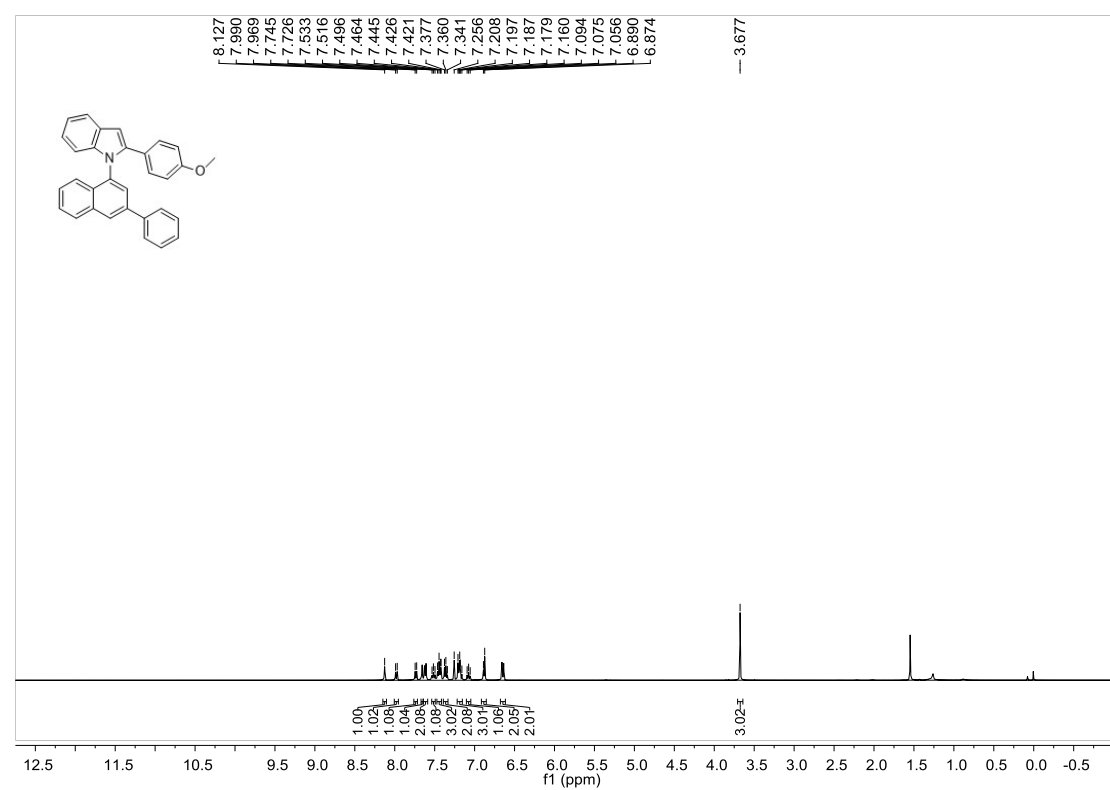



### <sup>13</sup>C NMR Spectrum of **13c**

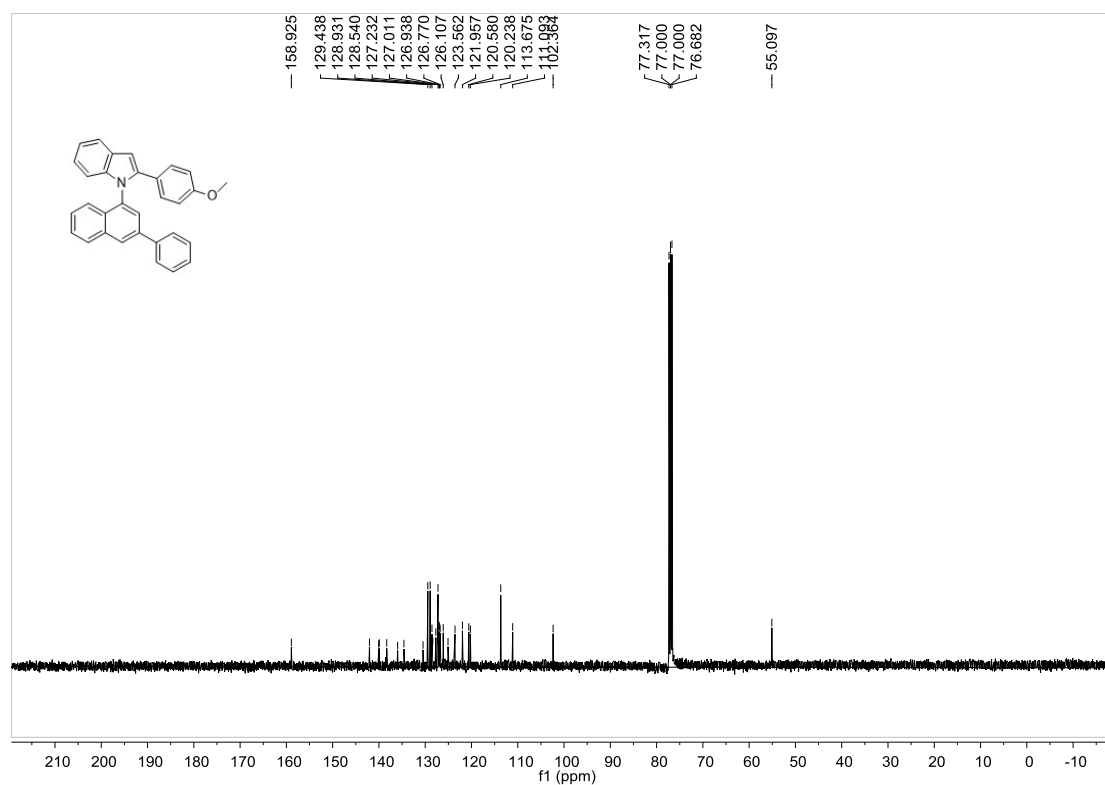

### <sup>1</sup>H NMR Spectrum of **14c**

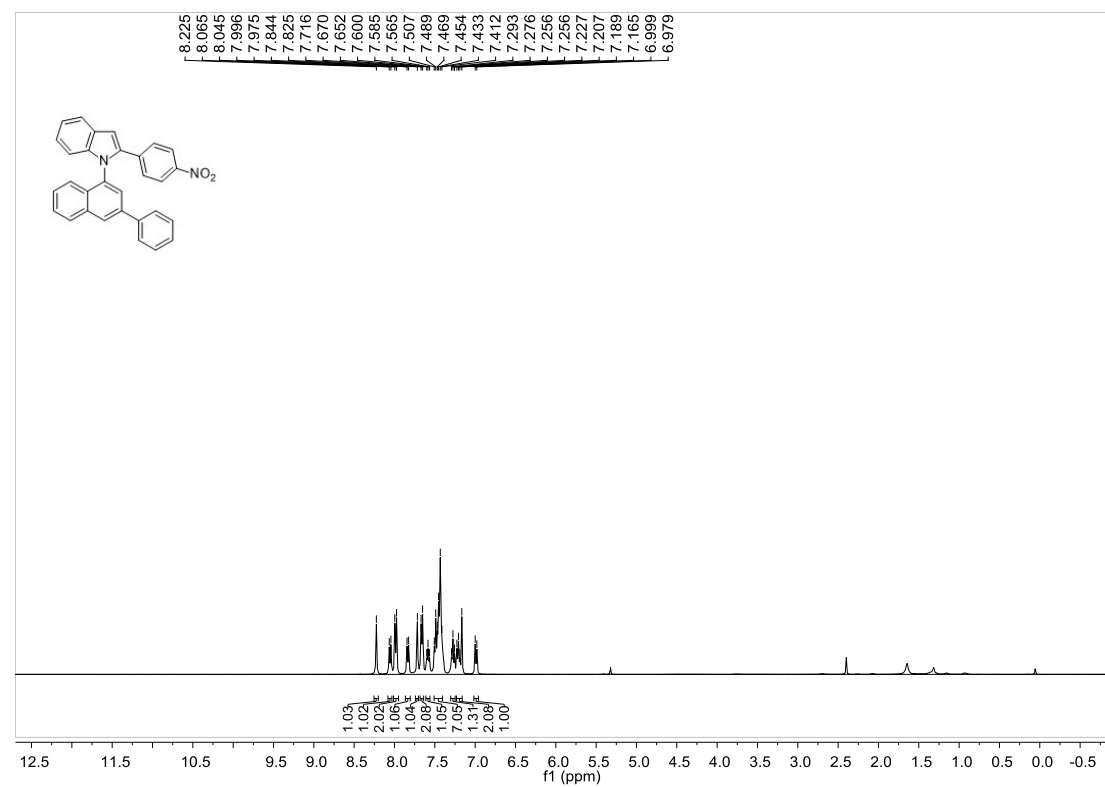

### <sup>13</sup>C NMR Spectrum of **14c**

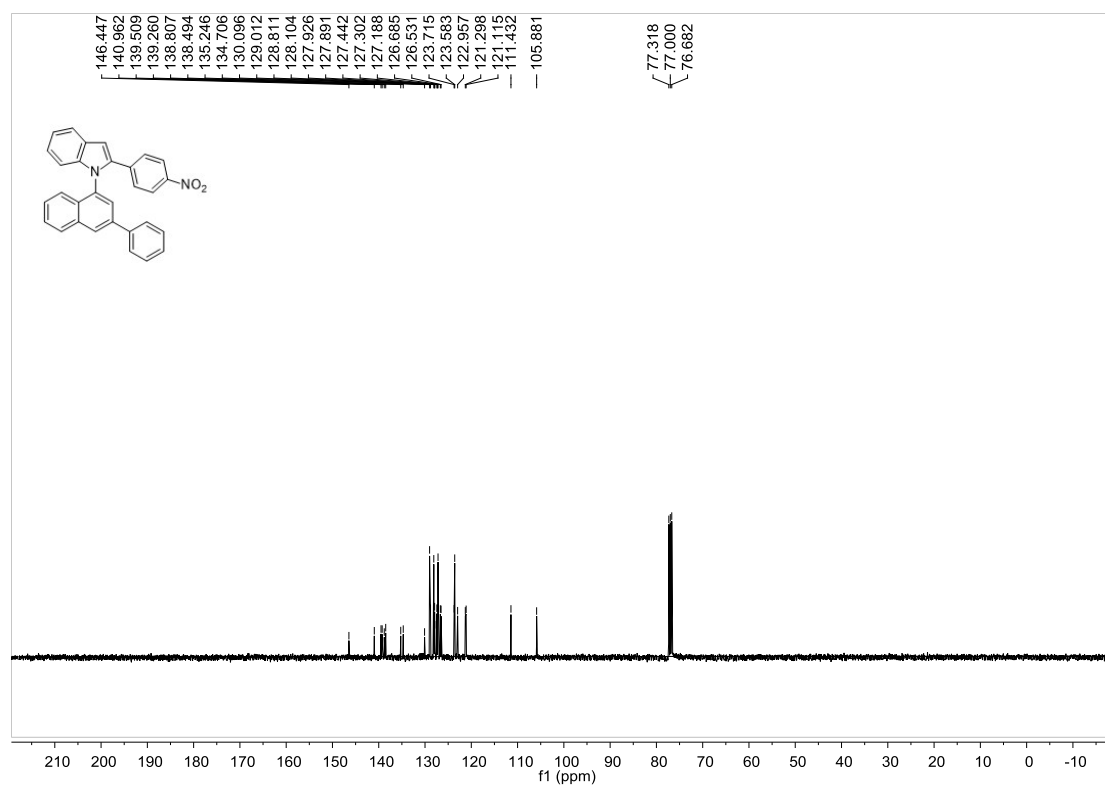

### <sup>1</sup>H NMR Spectrum of **15c**

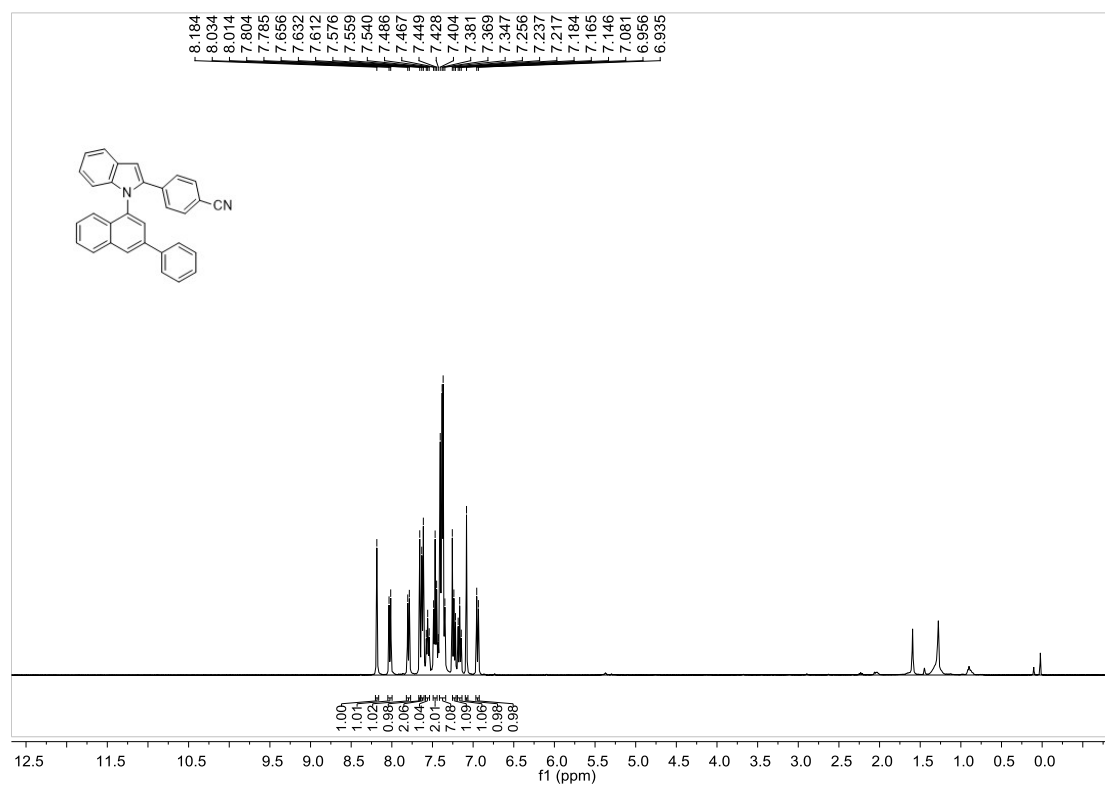

### <sup>13</sup>C NMR Spectrum of **15c**

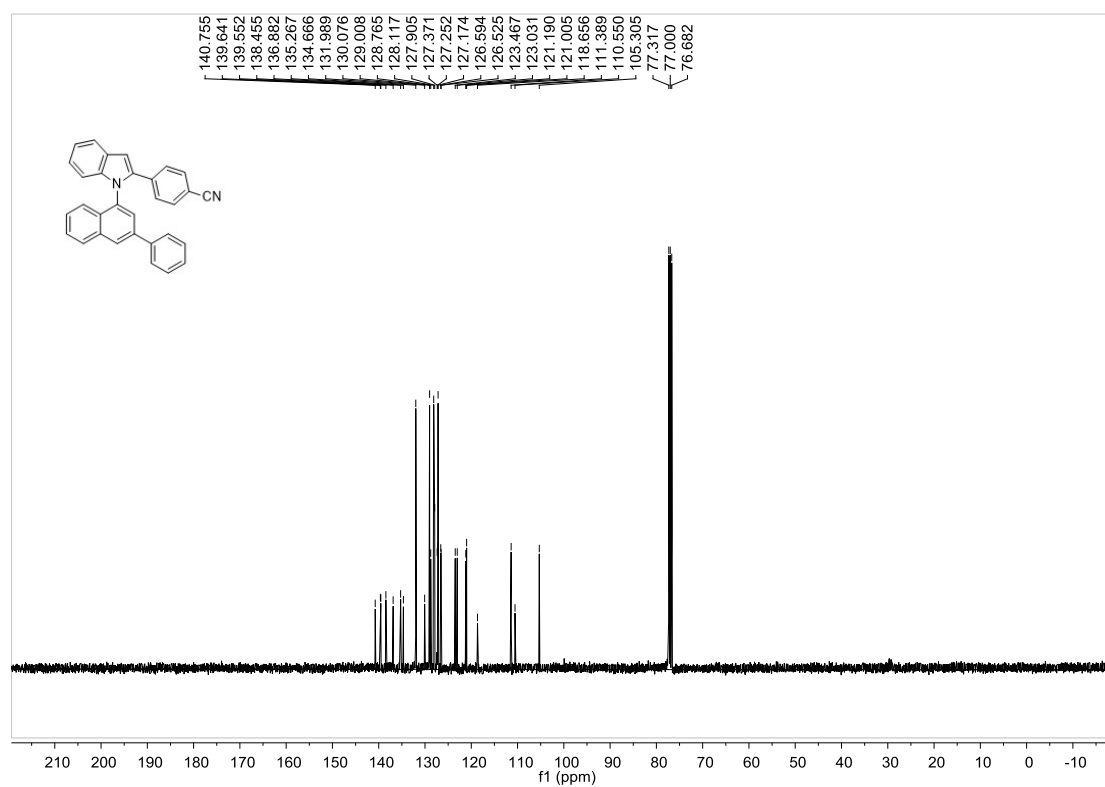

### <sup>1</sup>H NMR Spectrum of **16c**

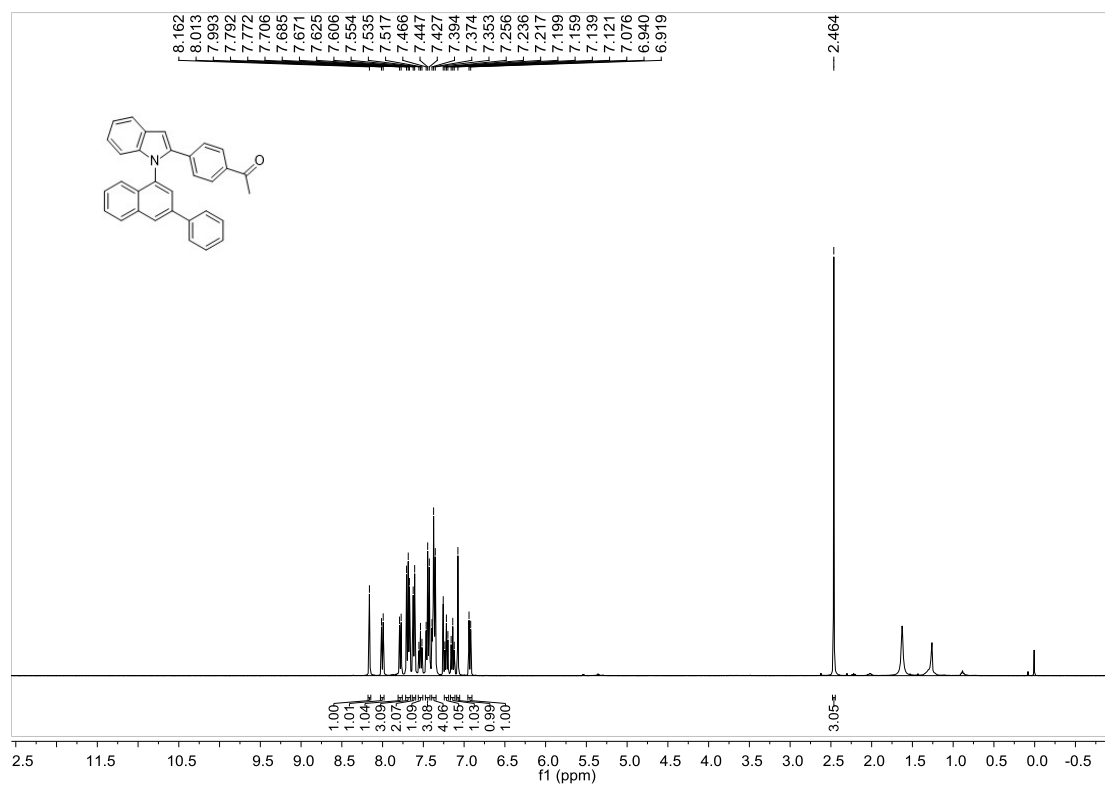

### <sup>13</sup>C NMR Spectrum of **16c**

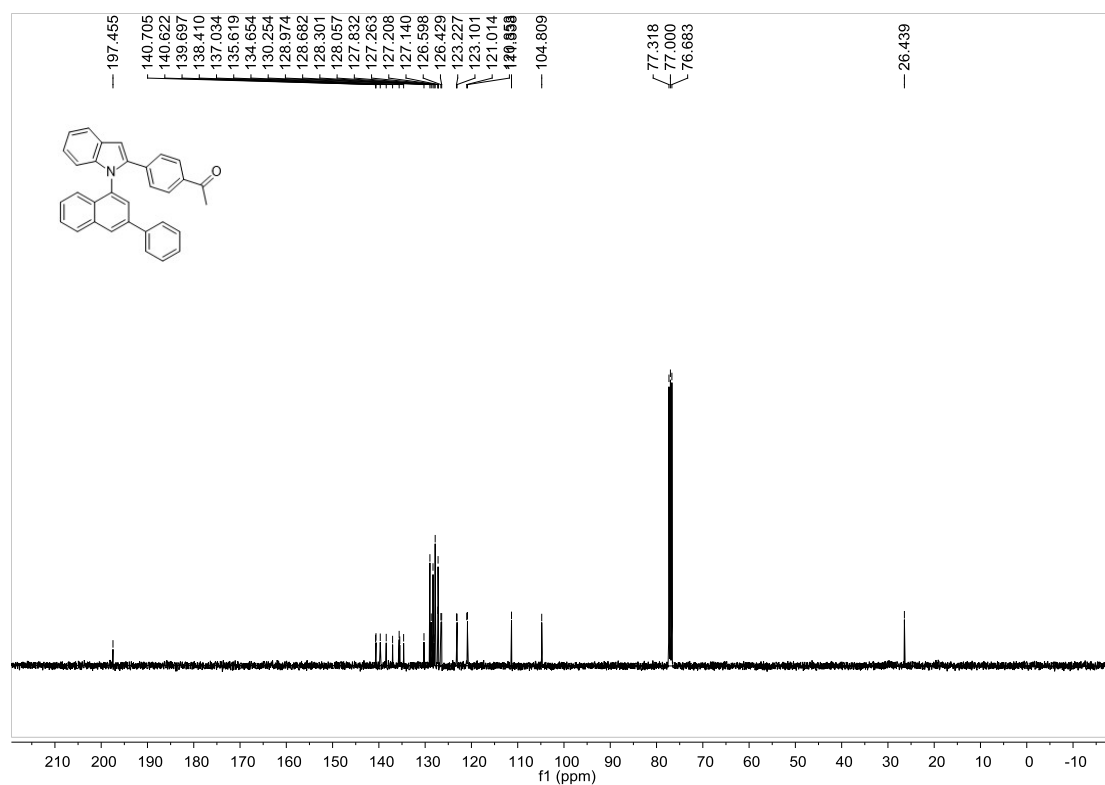

### <sup>1</sup>H NMR Spectrum of **17c**

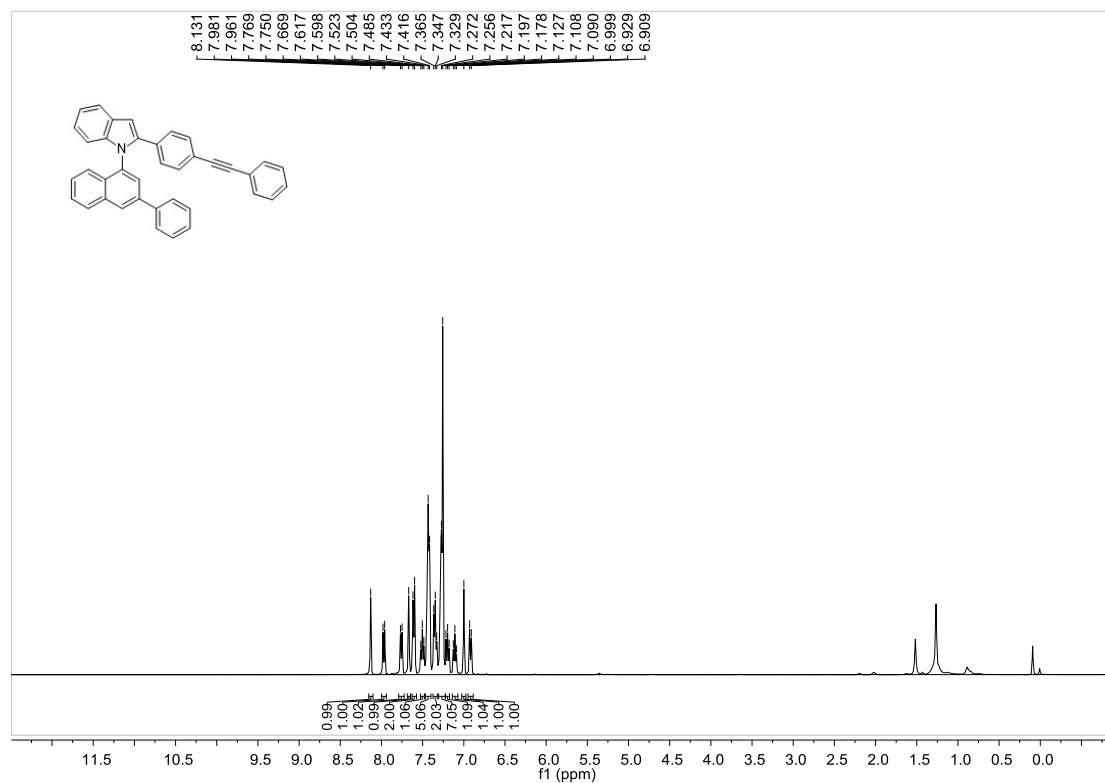

### <sup>13</sup>C NMR Spectrum of **17c**

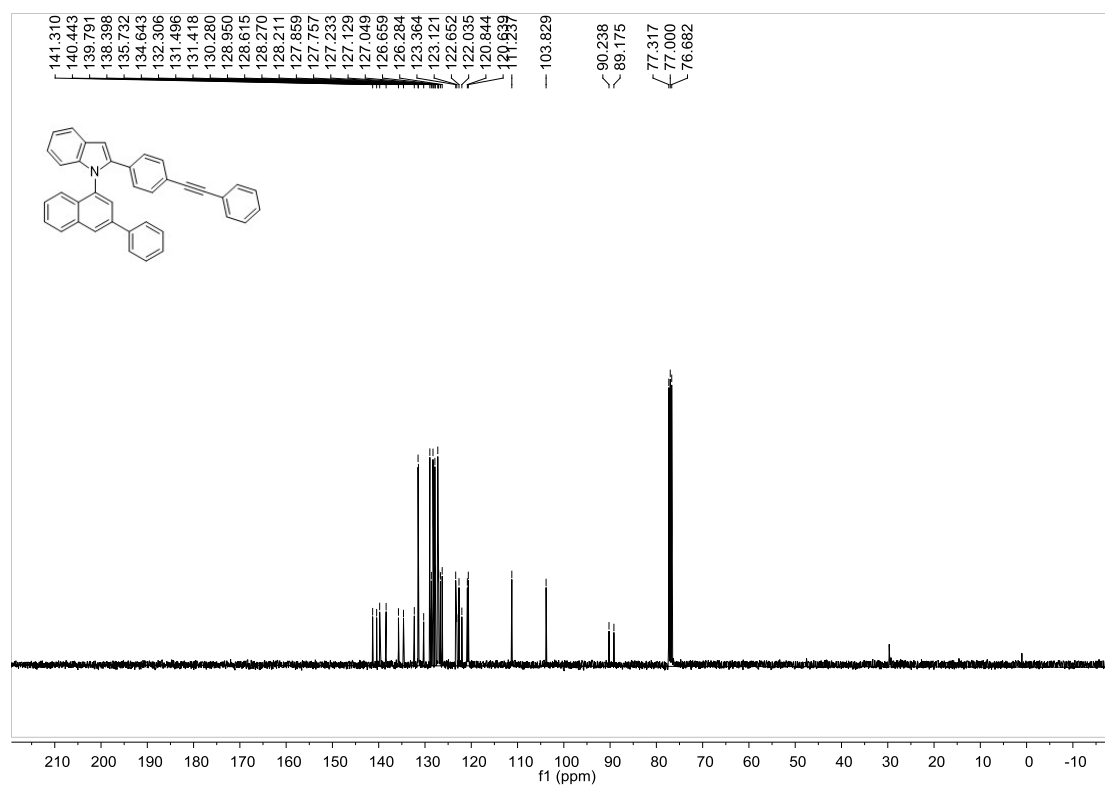

### <sup>1</sup>H NMR Spectrum of **18c**

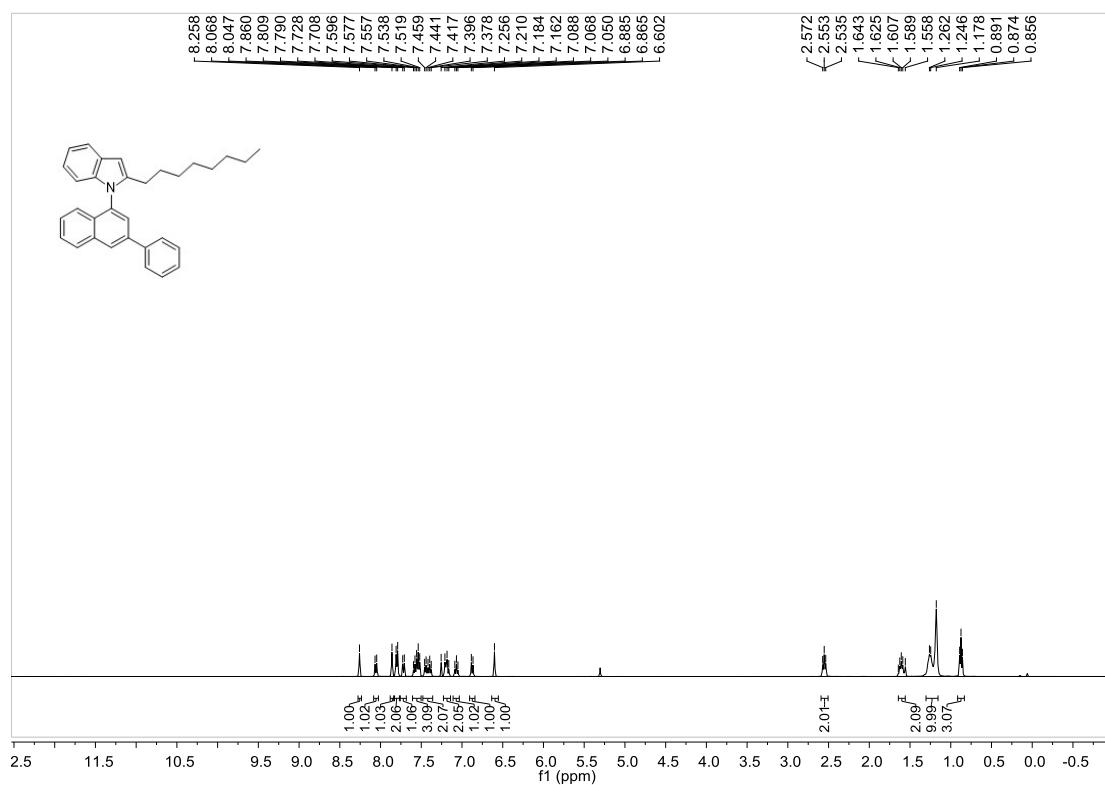

### <sup>13</sup>C NMR Spectrum of **18c**

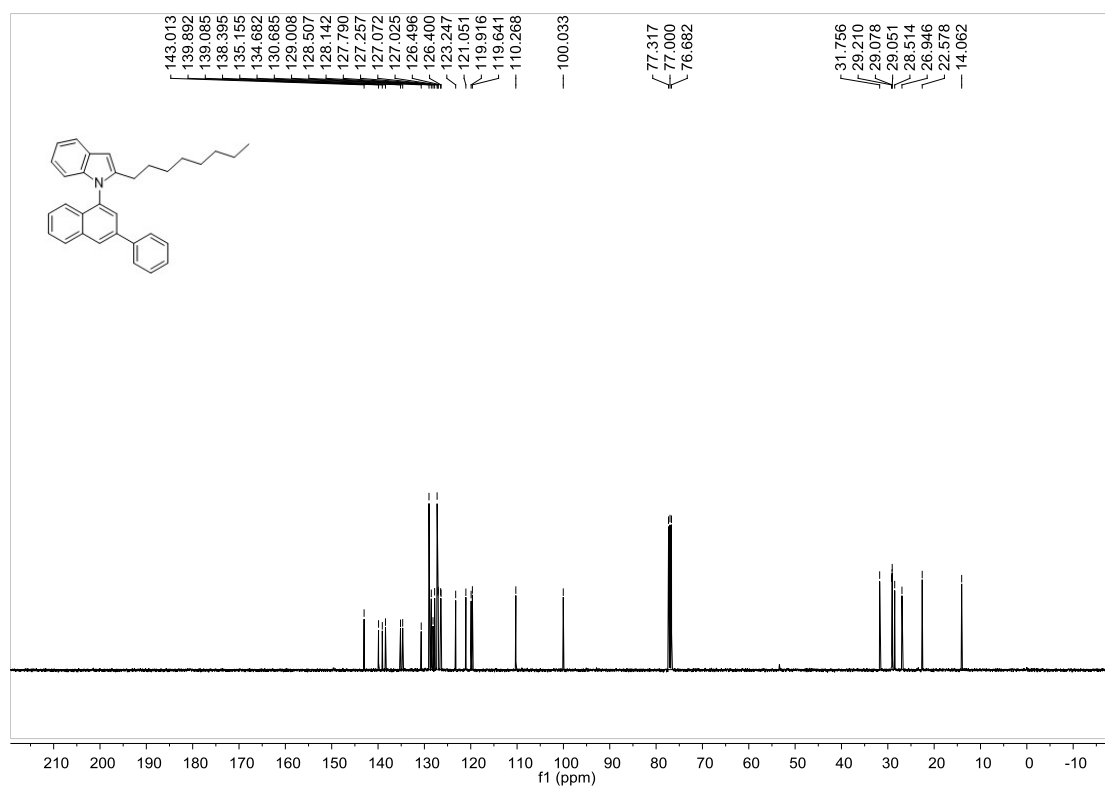

### <sup>1</sup>H NMR Spectrum of **19c**

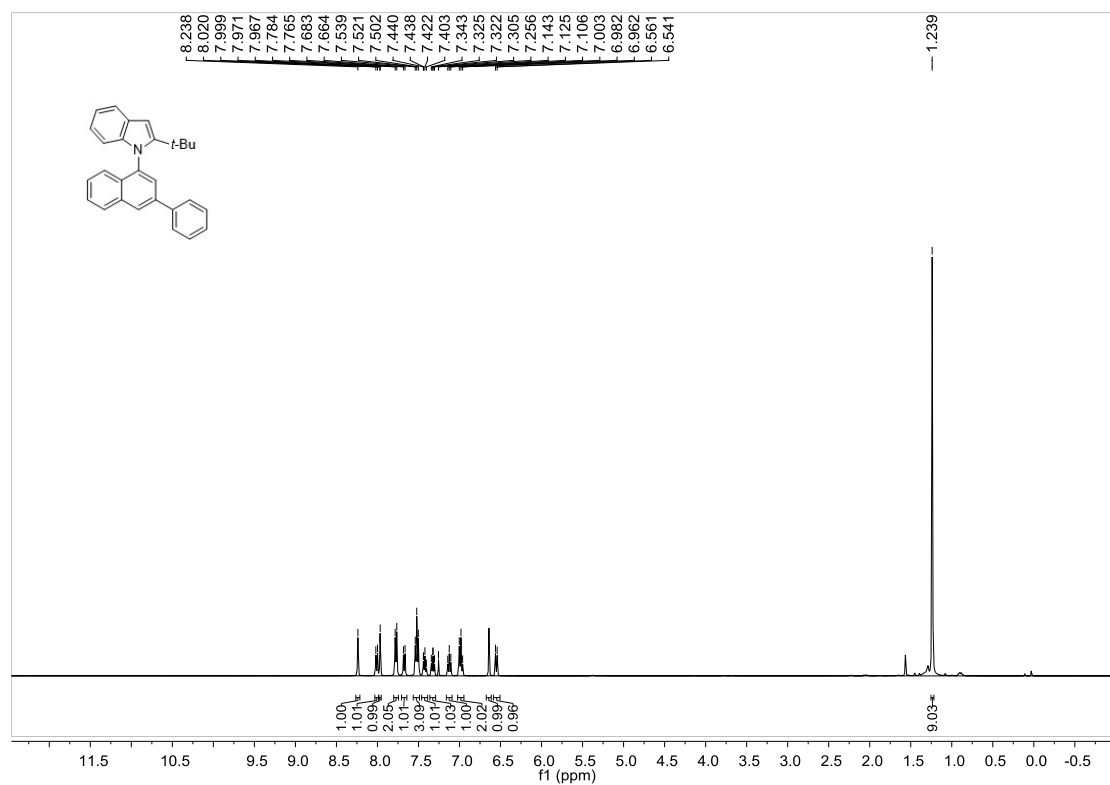

### <sup>13</sup>C NMR Spectrum of **19c**

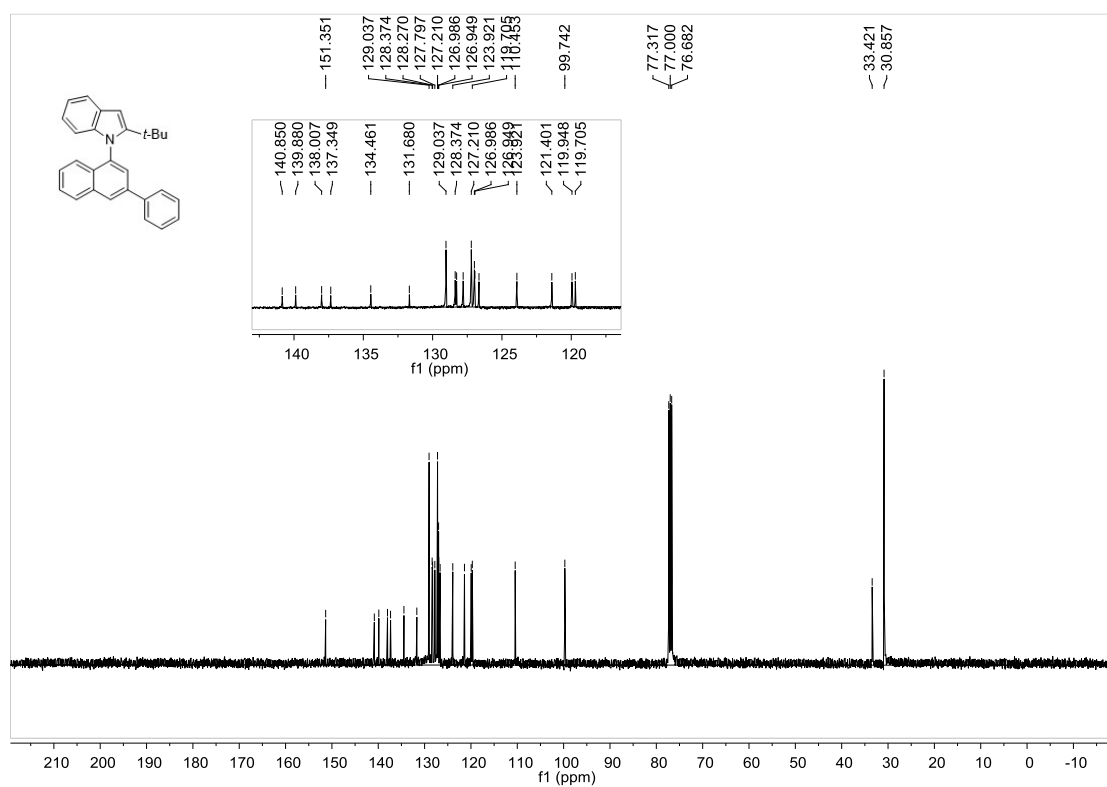

### <sup>1</sup>H NMR Spectrum of **20c**

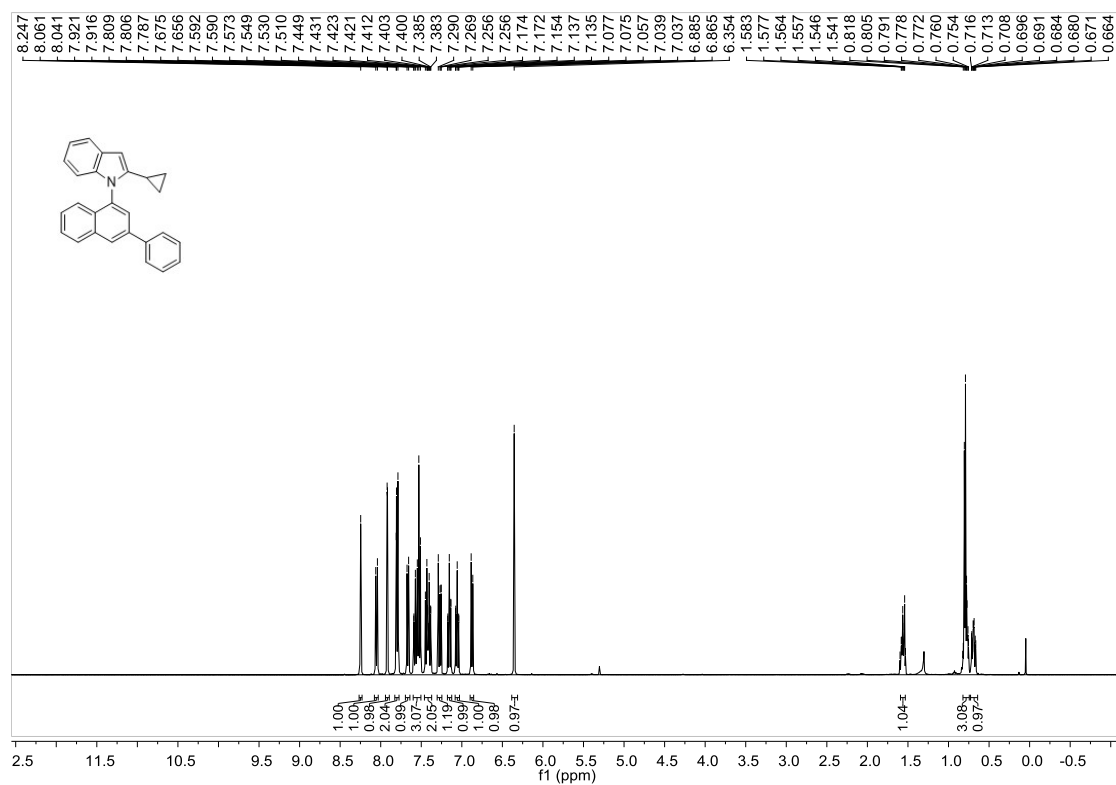

### <sup>13</sup>C NMR Spectrum of 20c

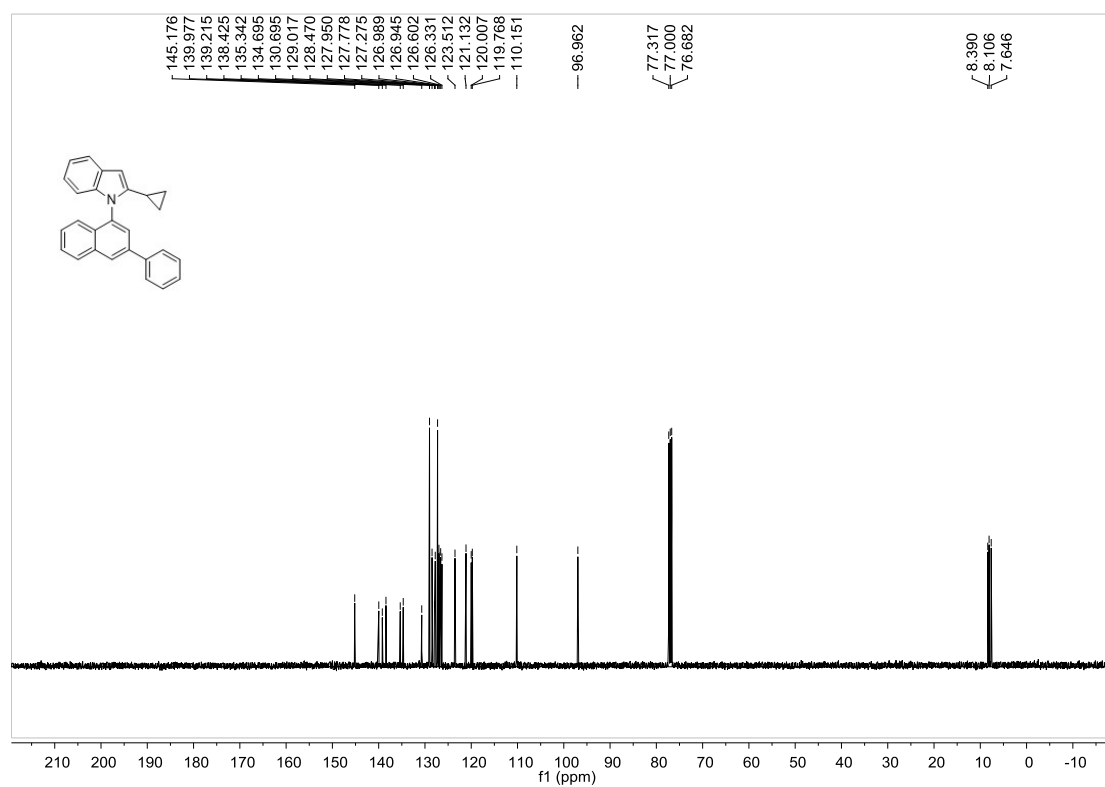

### <sup>1</sup>H NMR Spectrum of 21c

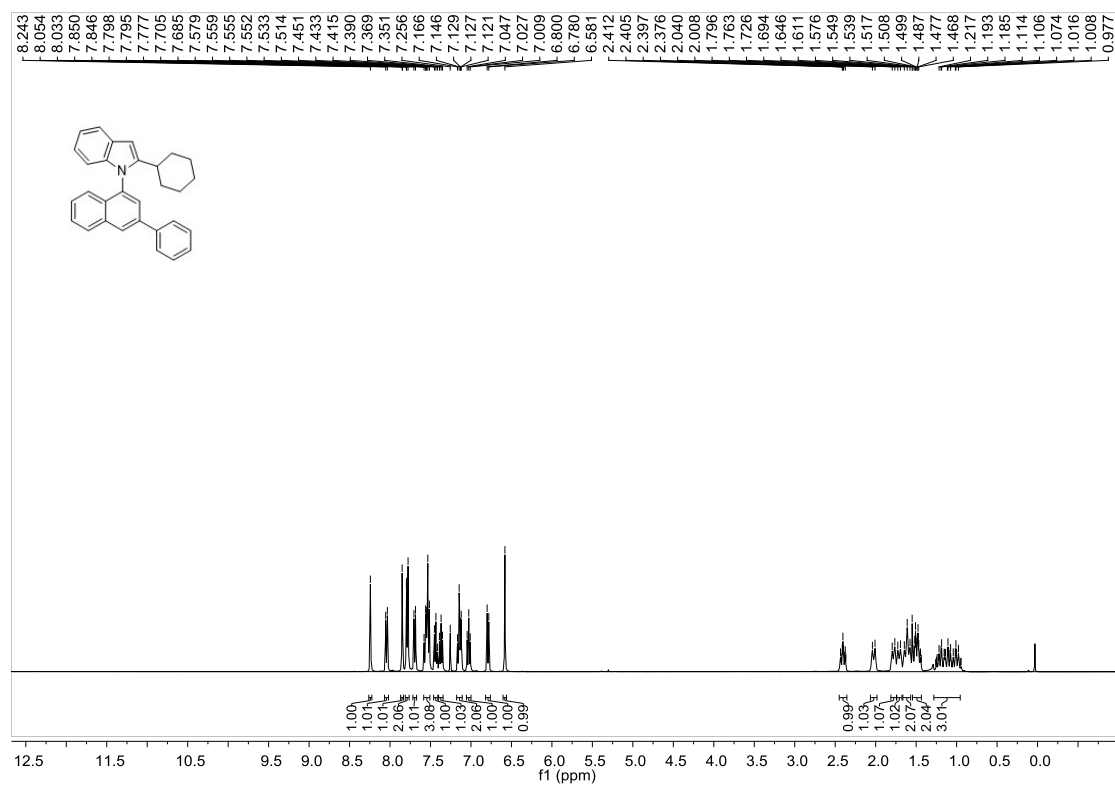



### <sup>13</sup>C NMR Spectrum of **21c**

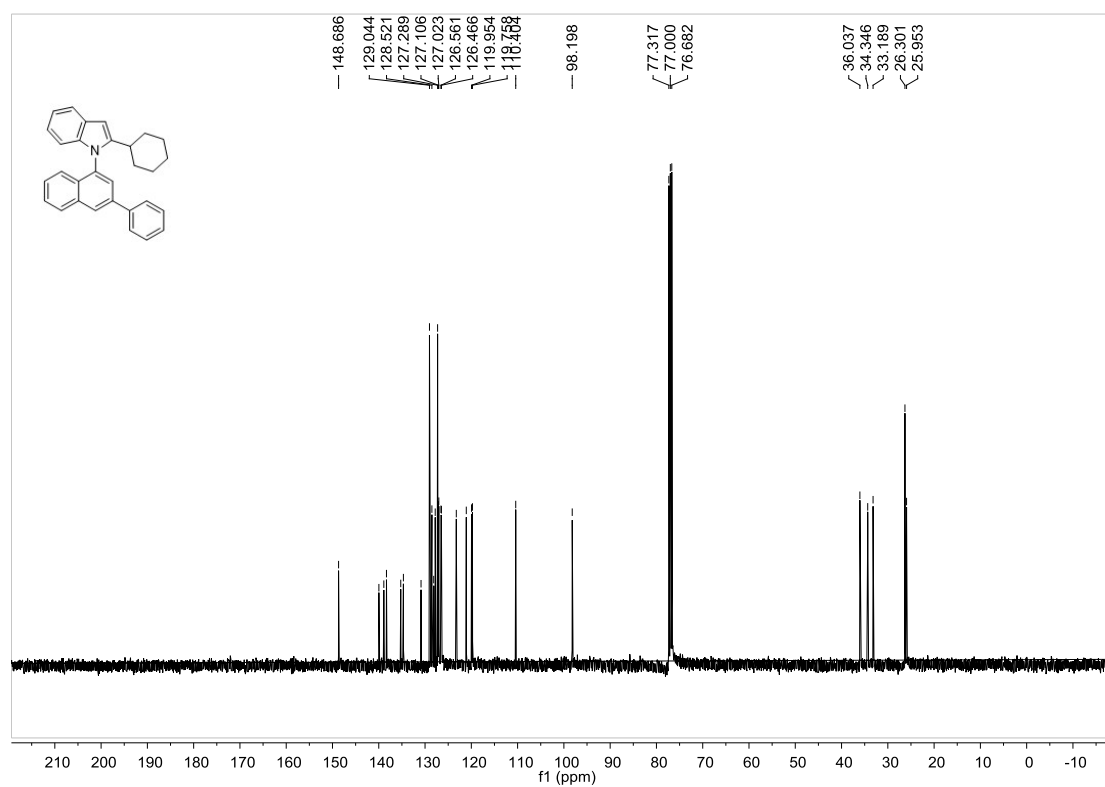

### <sup>1</sup>H NMR Spectrum of **22c**

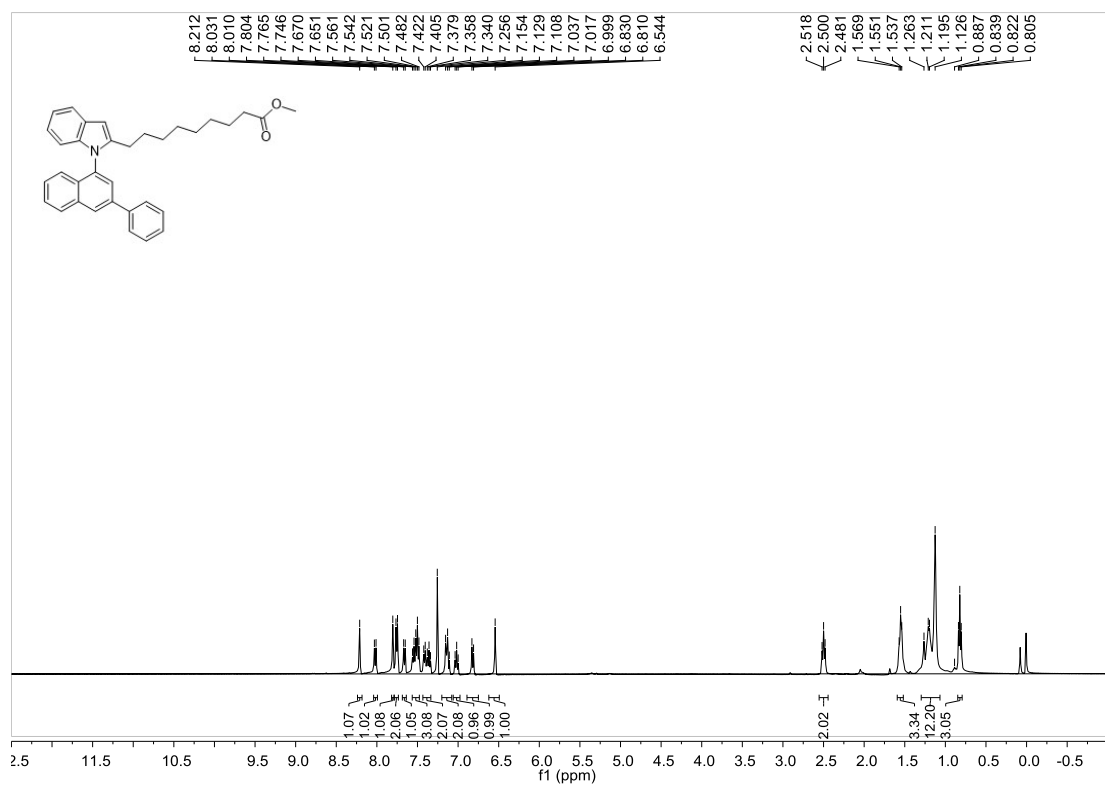

### <sup>13</sup>C NMR Spectrum of **22c**

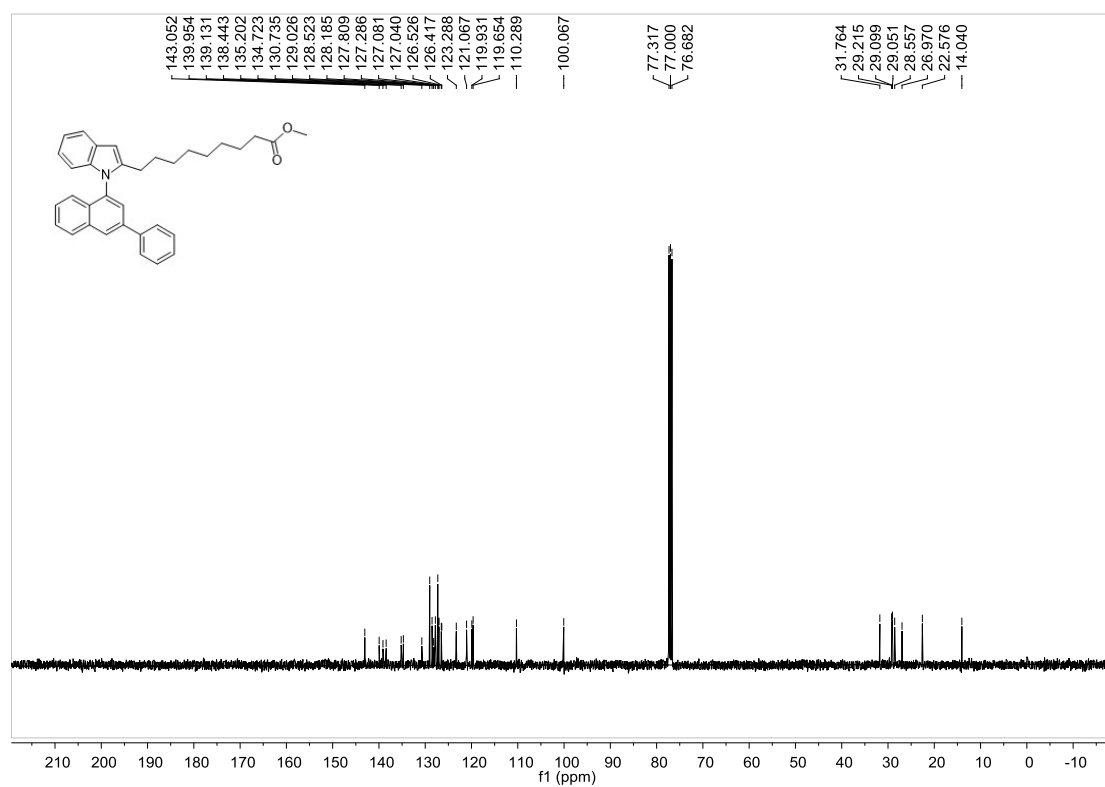

### <sup>1</sup>H NMR Spectrum of **23c**

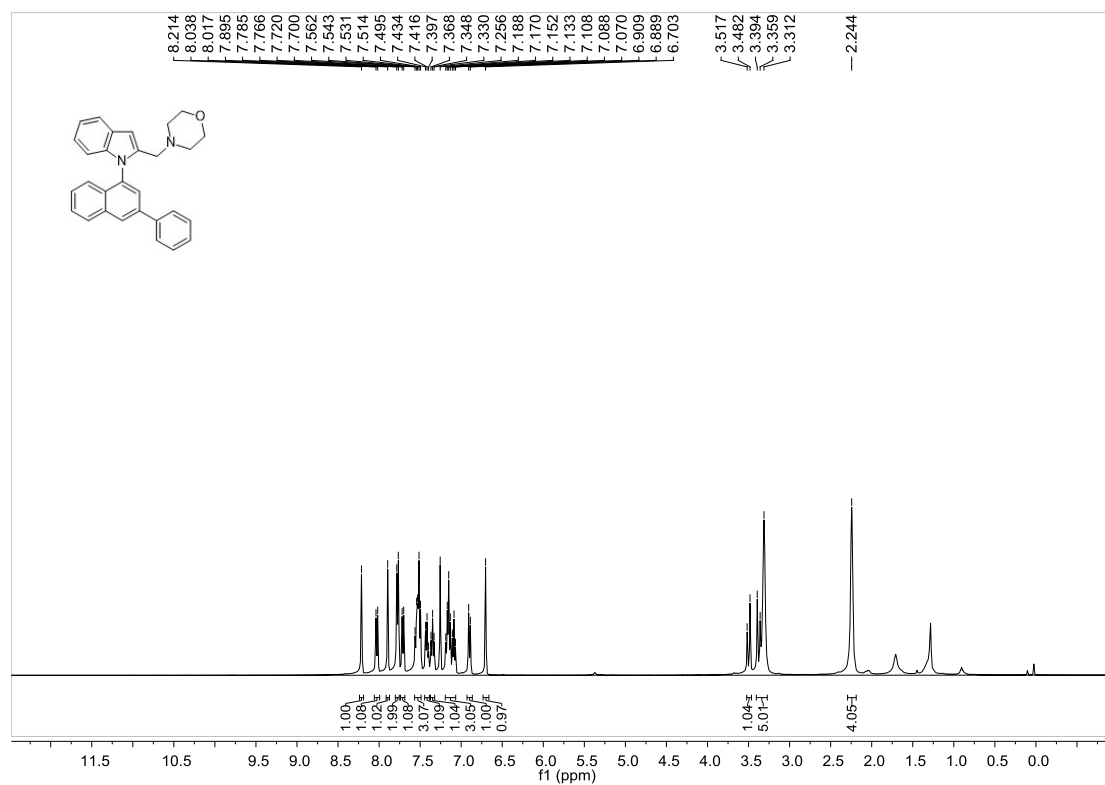

### <sup>13</sup>C NMR Spectrum of 23c

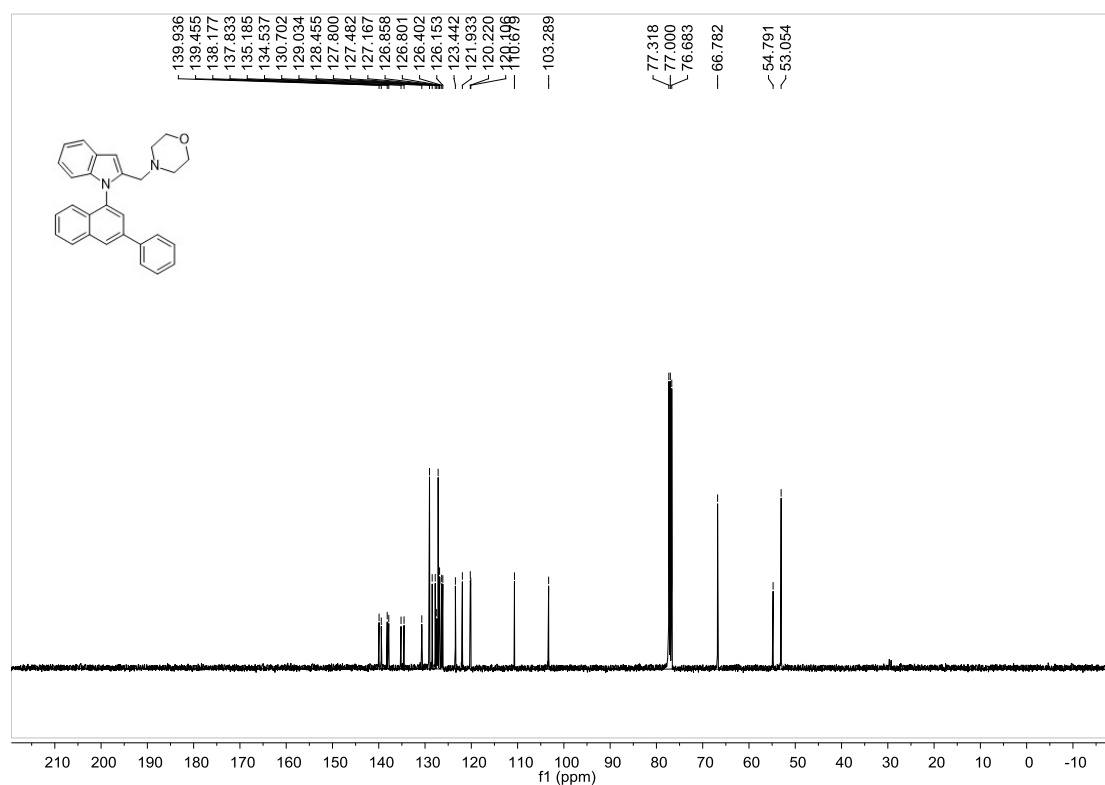

### <sup>1</sup>H NMR Spectrum of 24c

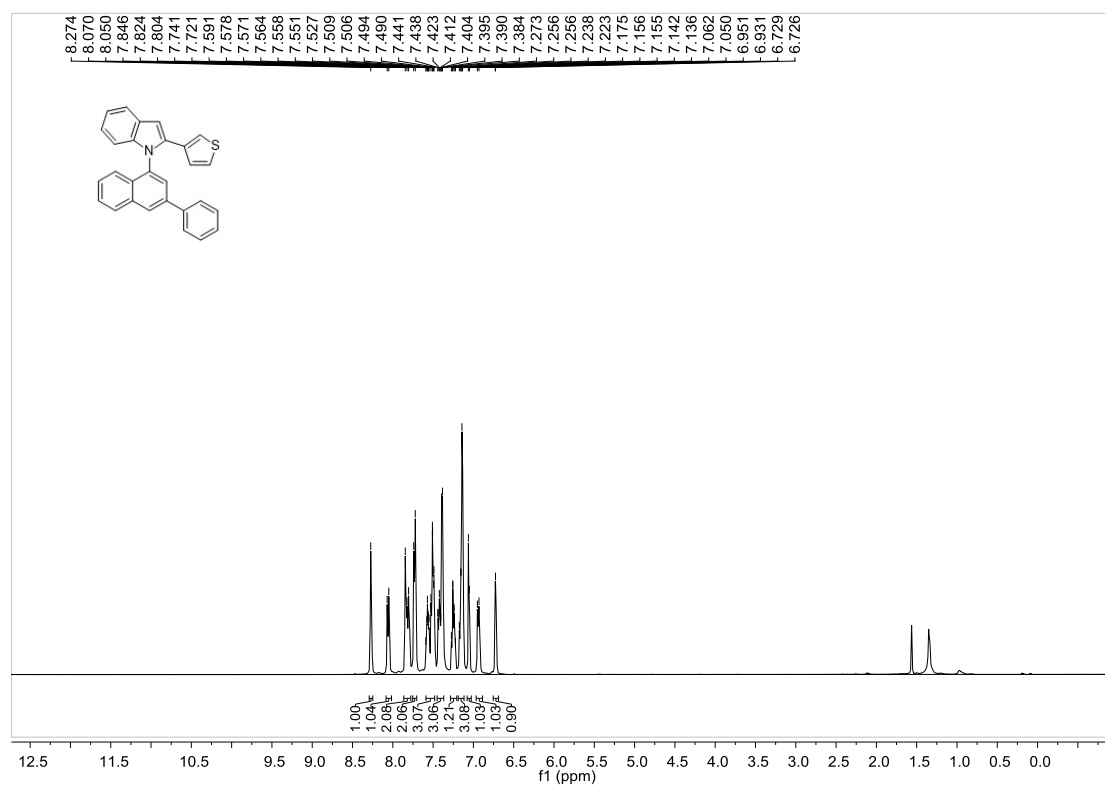

### <sup>13</sup>C NMR Spectrum of 24c

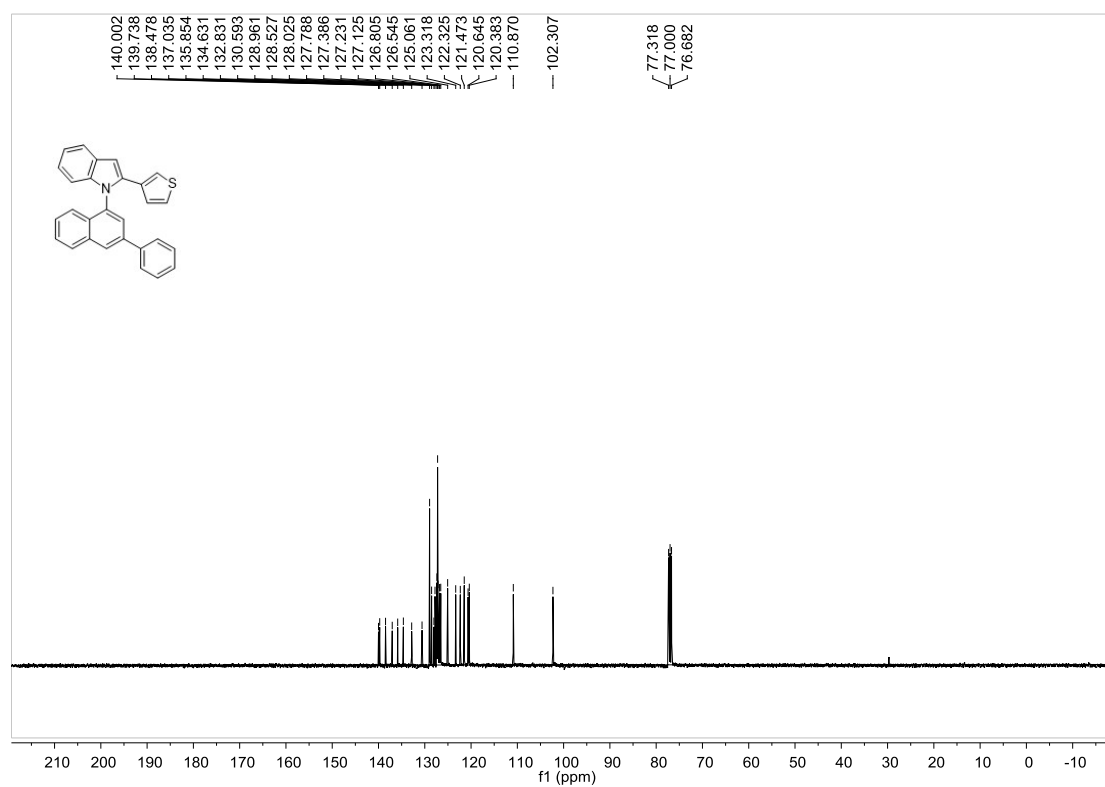

### <sup>1</sup>H NMR Spectrum of 25c

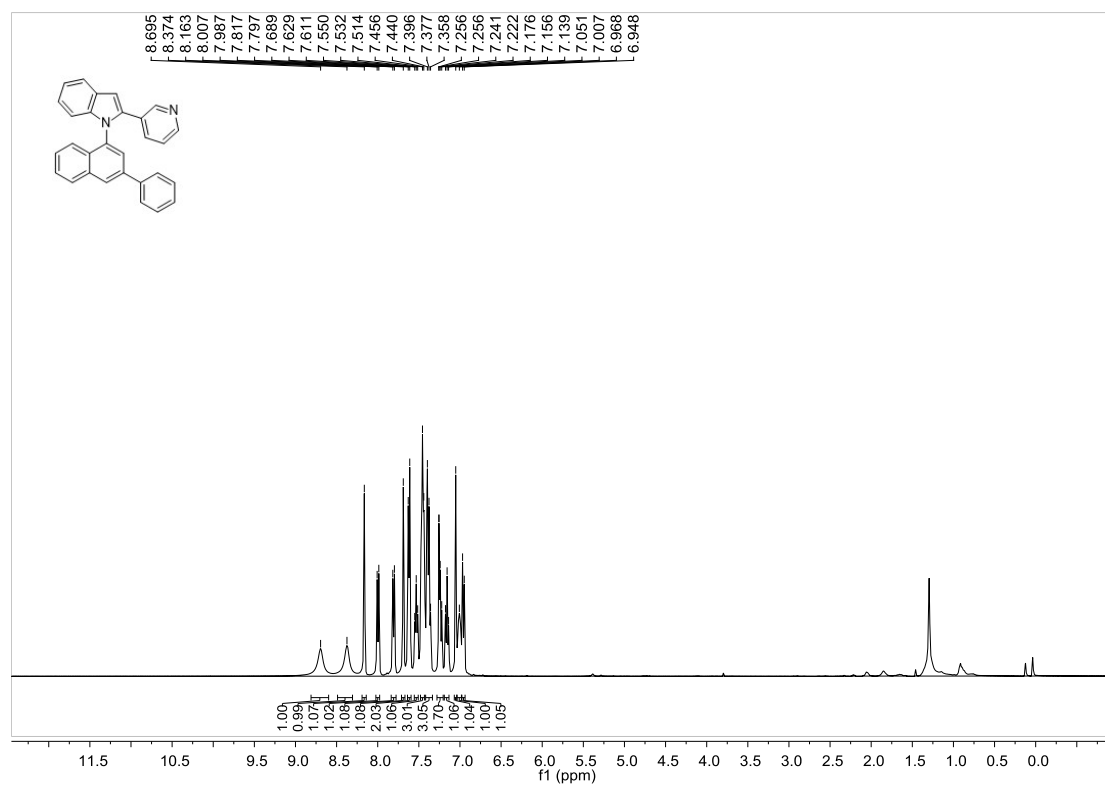

### <sup>13</sup>C NMR Spectrum of **25c**

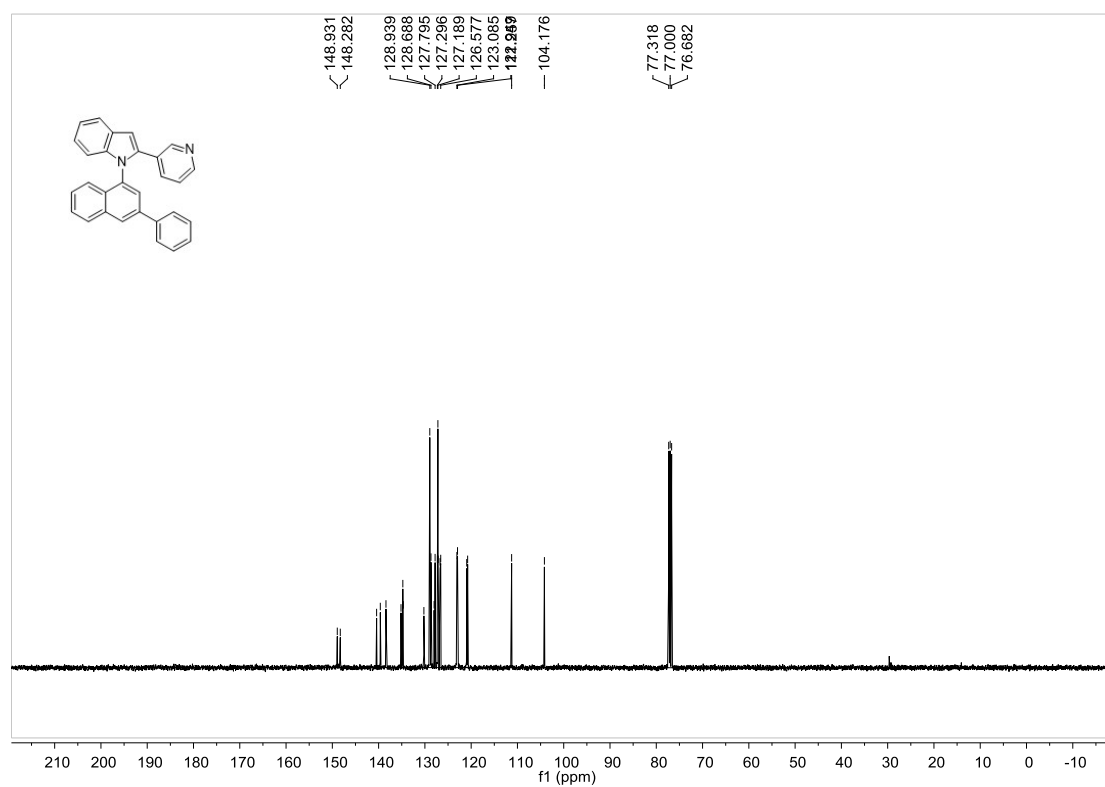

### <sup>1</sup>H NMR Spectrum of **26c**

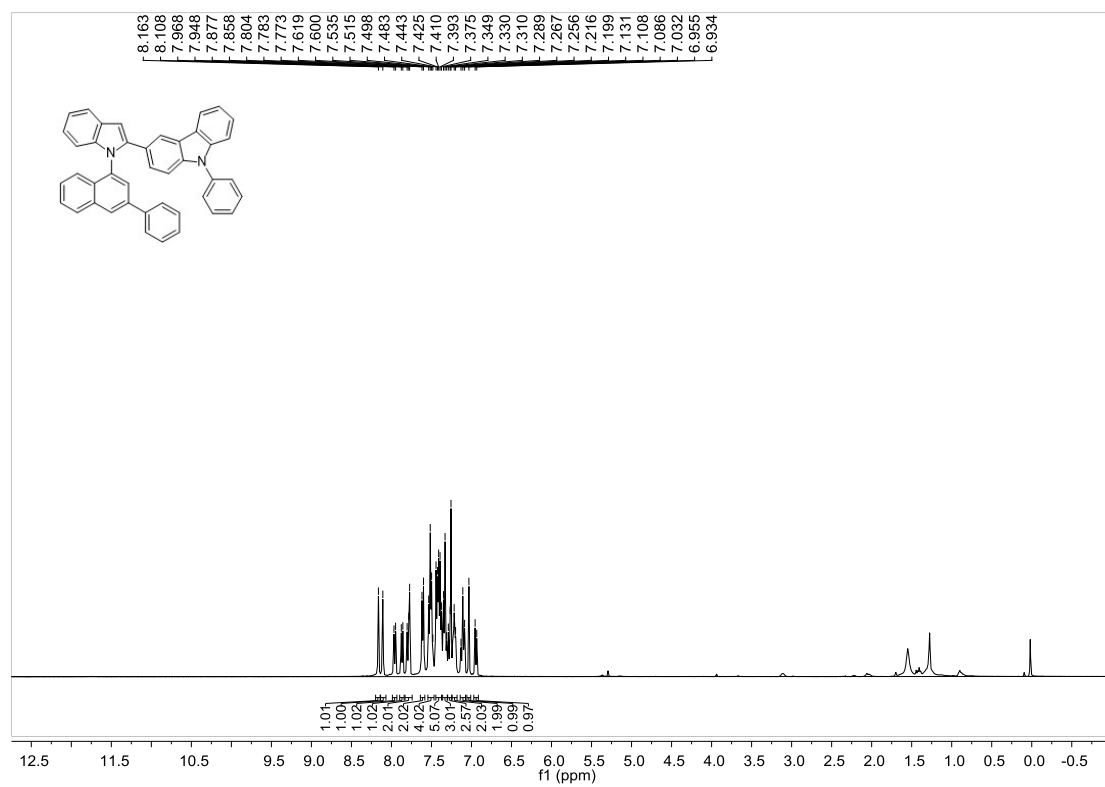



### <sup>13</sup>C NMR Spectrum of **27c**

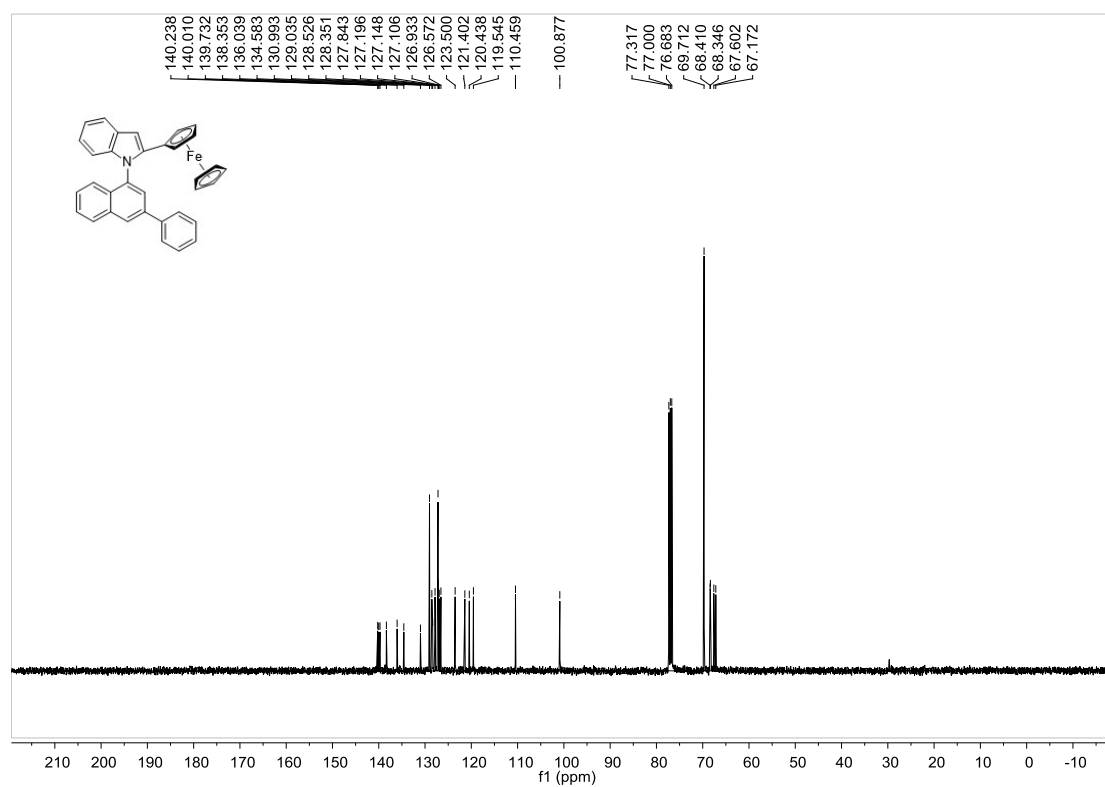

### <sup>1</sup>H NMR Spectrum of **28c**

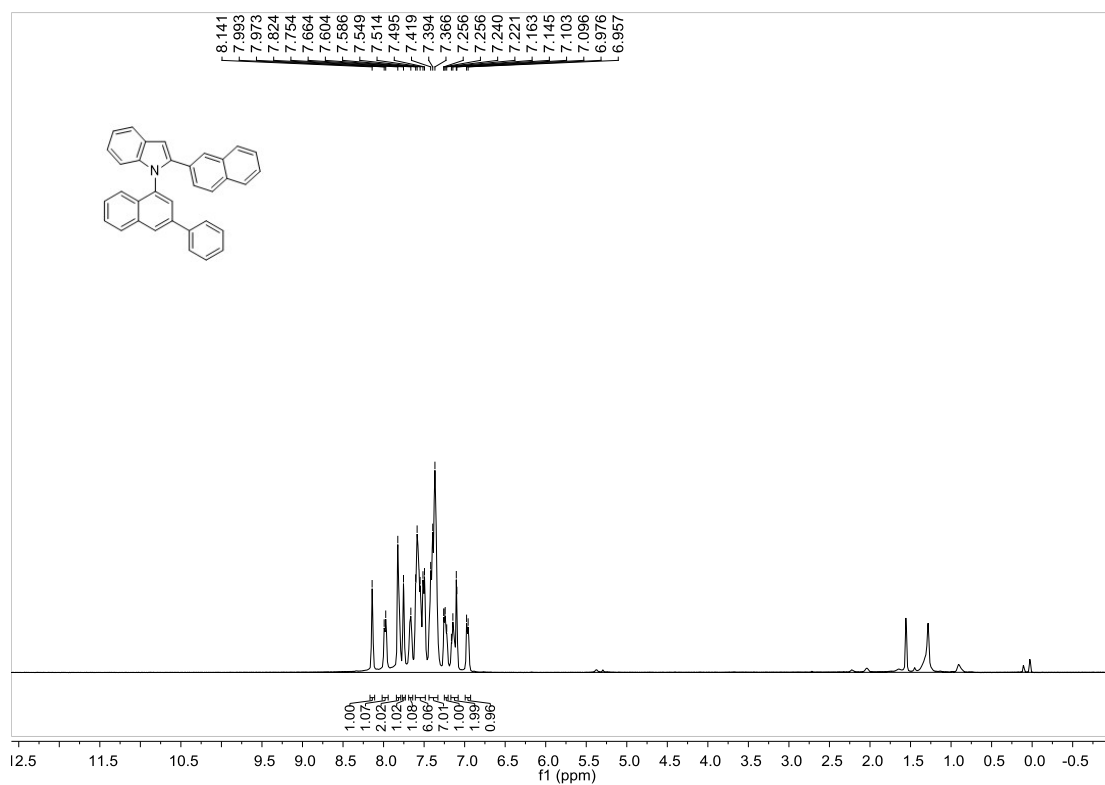

### <sup>13</sup>C NMR Spectrum of 28c

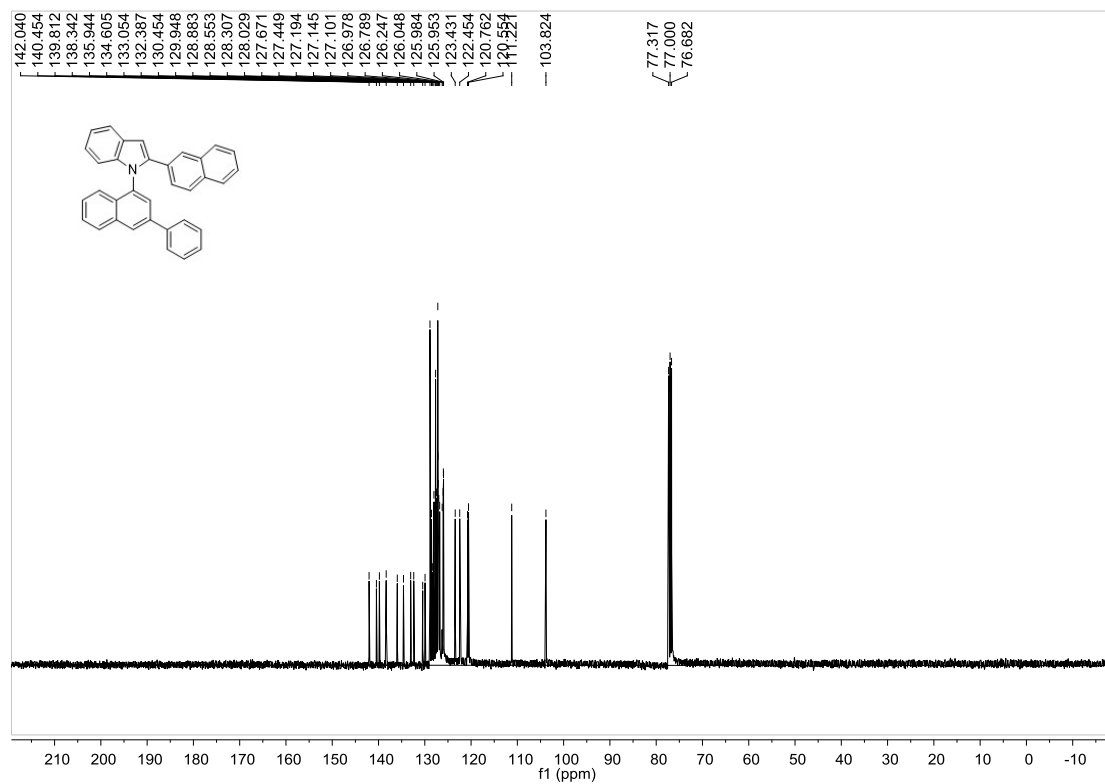

### <sup>1</sup>H NMR Spectrum of 29c

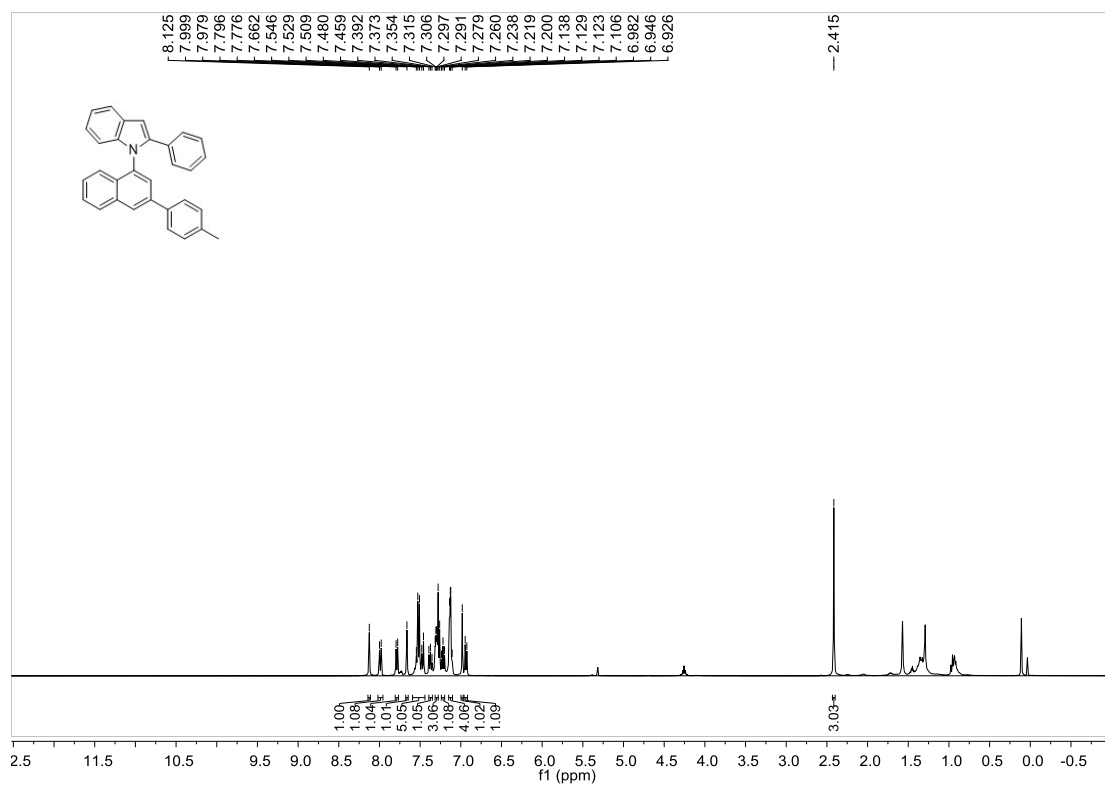



### <sup>13</sup>C NMR Spectrum of 29c

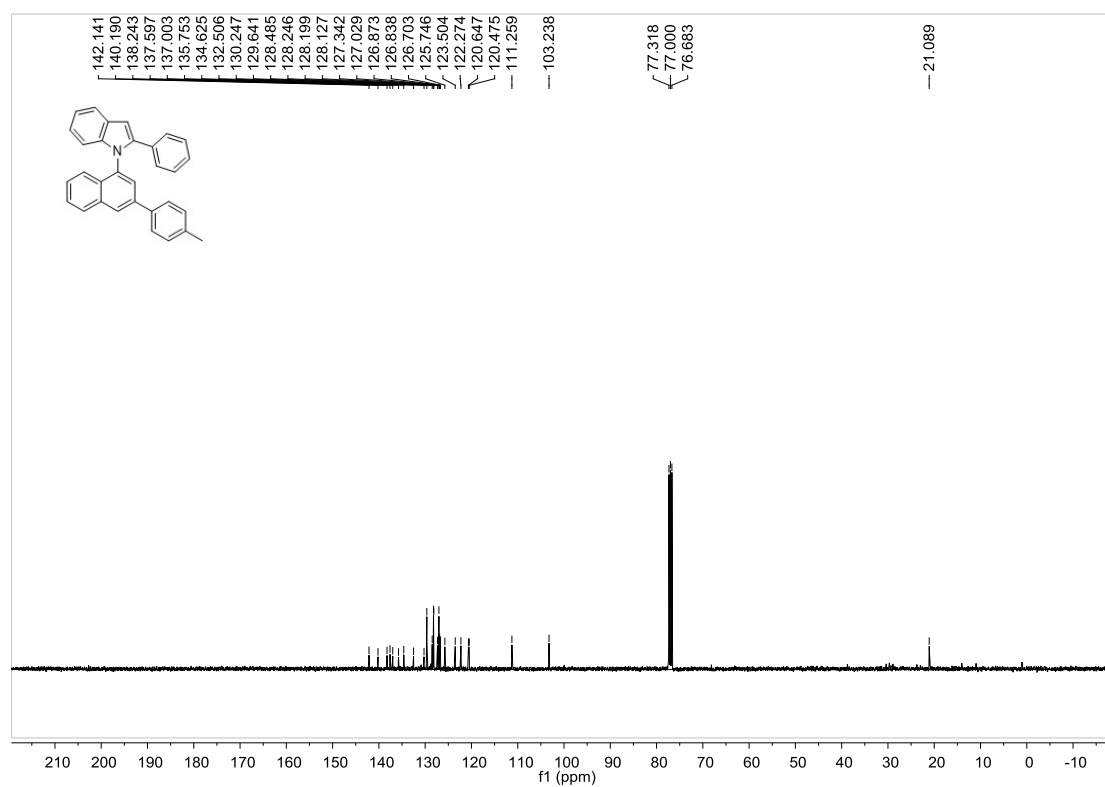

### <sup>1</sup>H NMR Spectrum of 30c

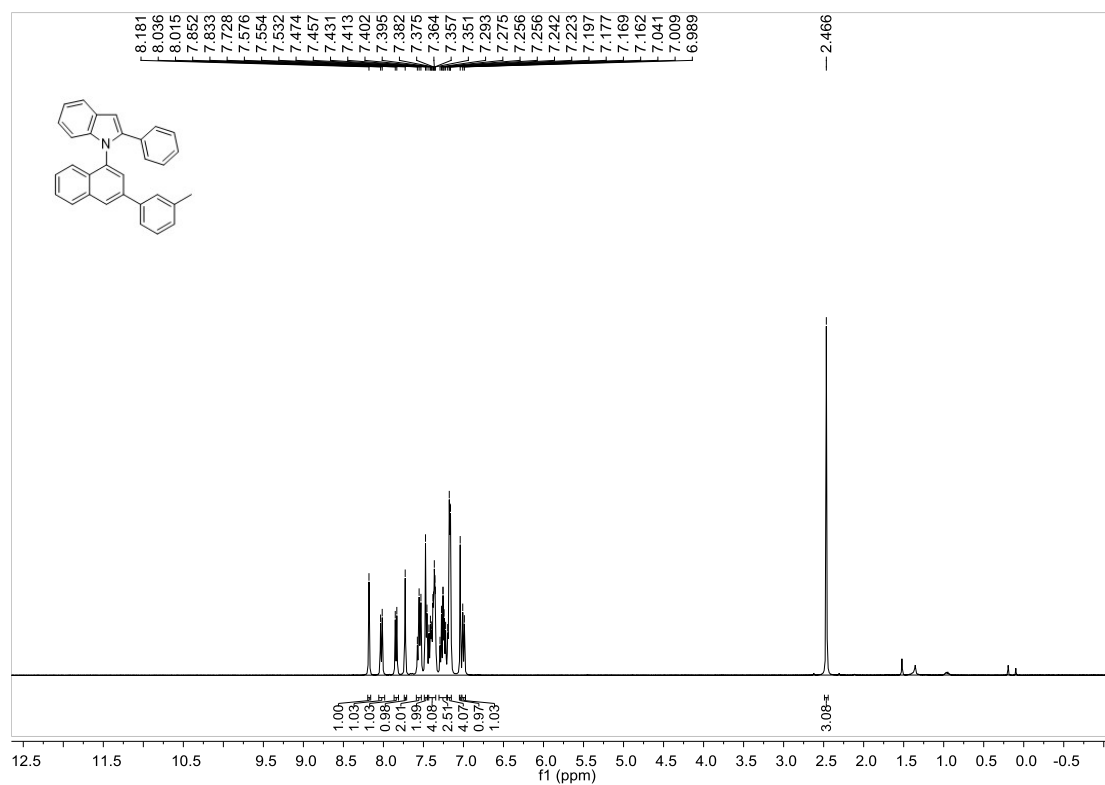

### <sup>13</sup>C NMR Spectrum of 30c

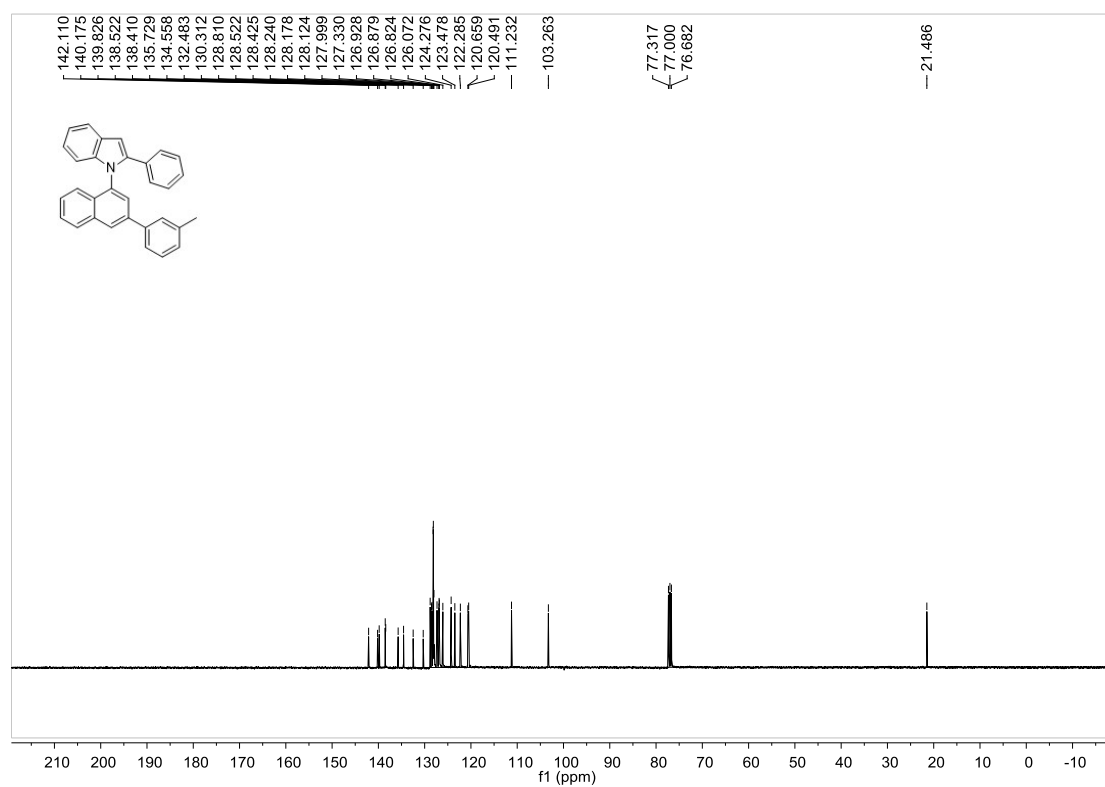

### <sup>1</sup>H NMR Spectrum of 31c

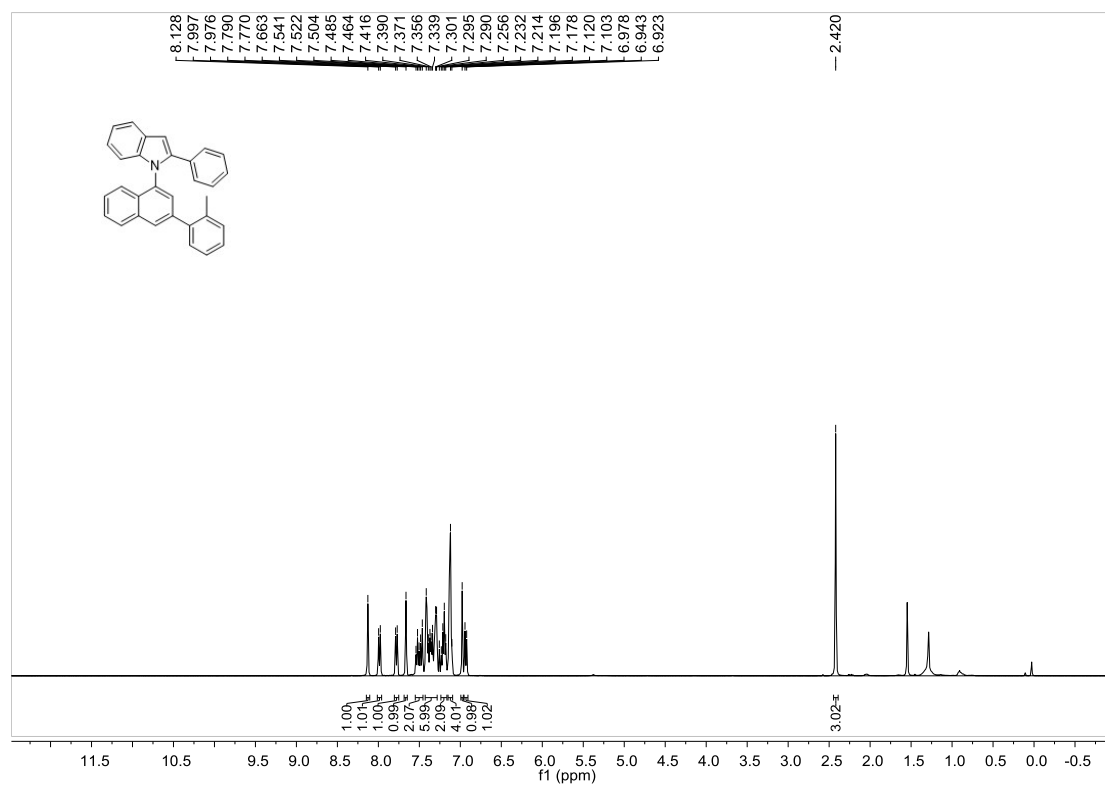

### <sup>13</sup>C NMR Spectrum of **31c**

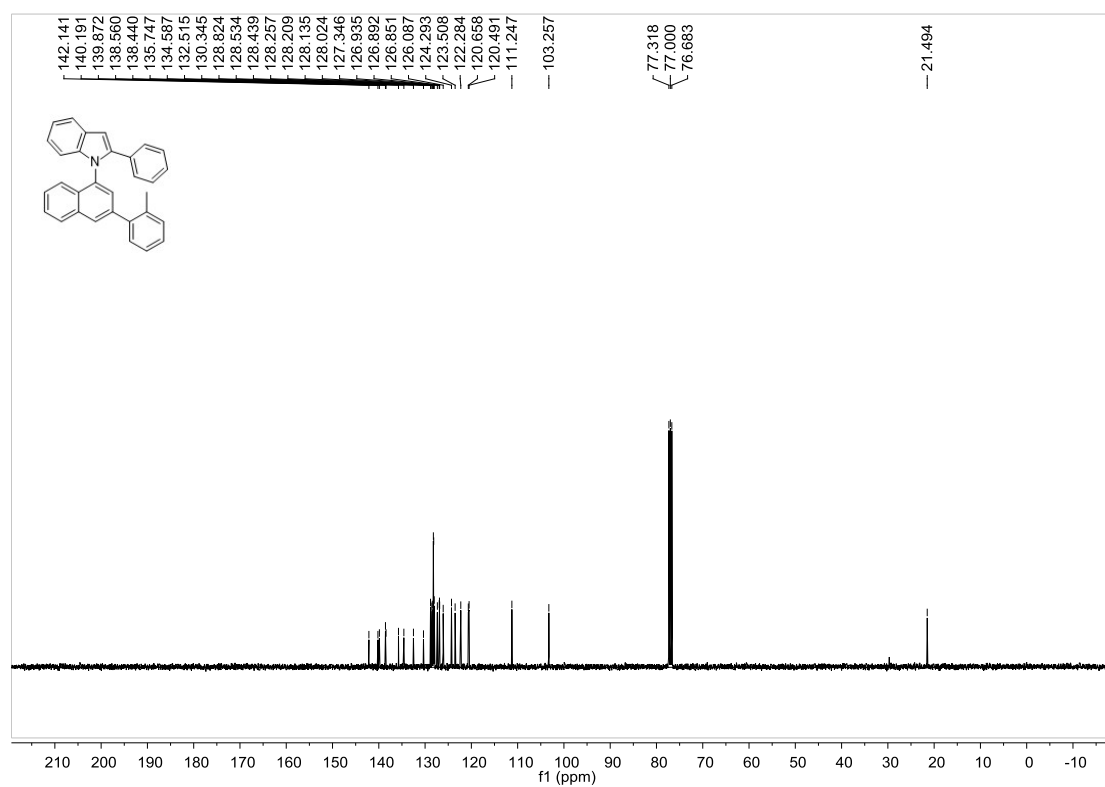

### <sup>1</sup>H NMR Spectrum of **32c**

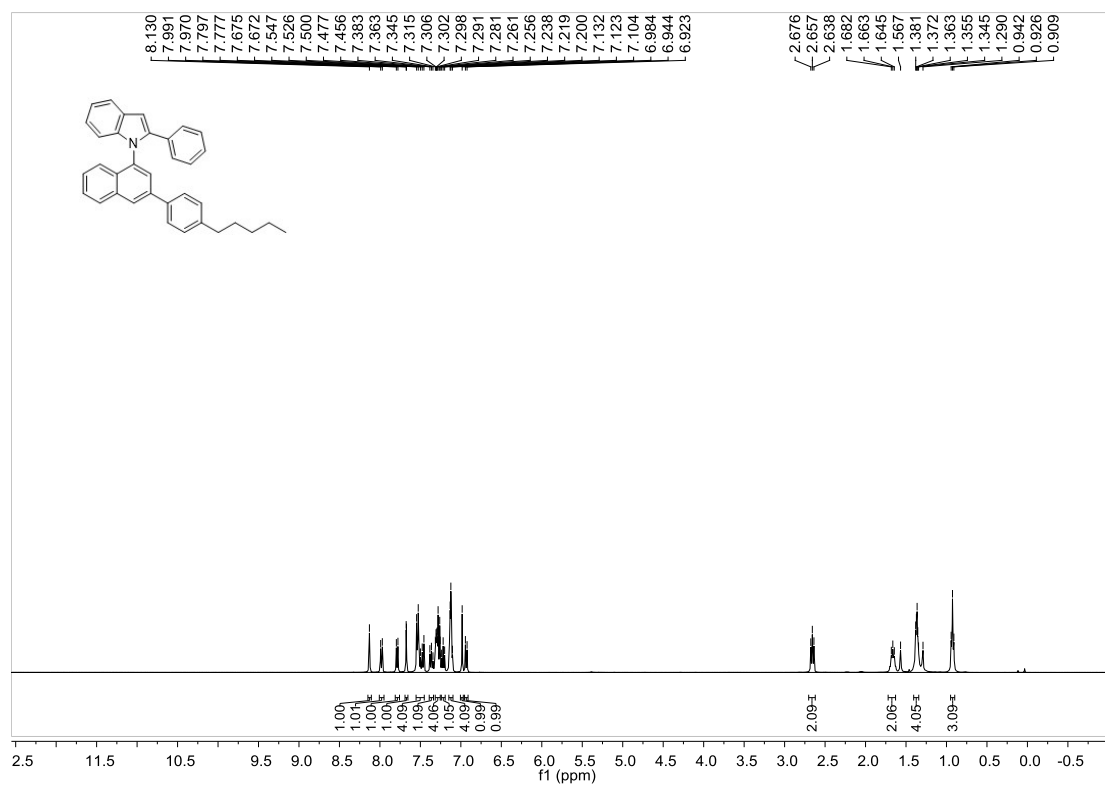

### <sup>13</sup>C NMR Spectrum of **32c**

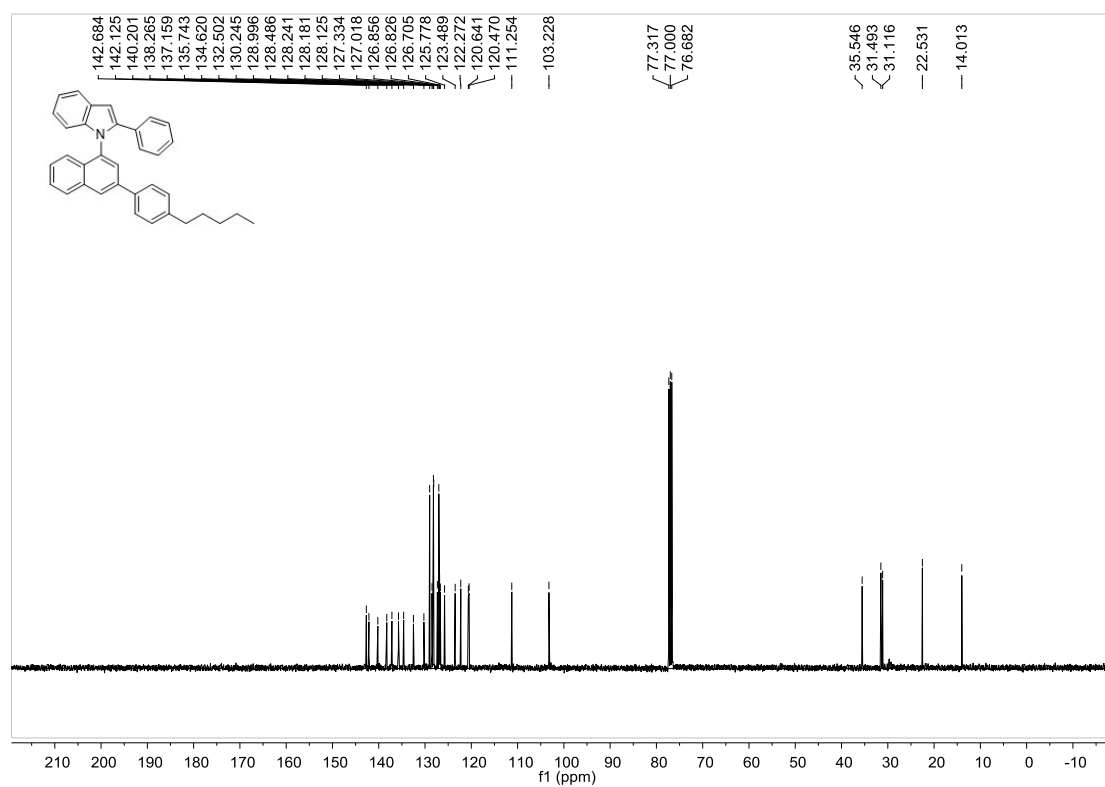

### <sup>1</sup>H NMR Spectrum of **33c**

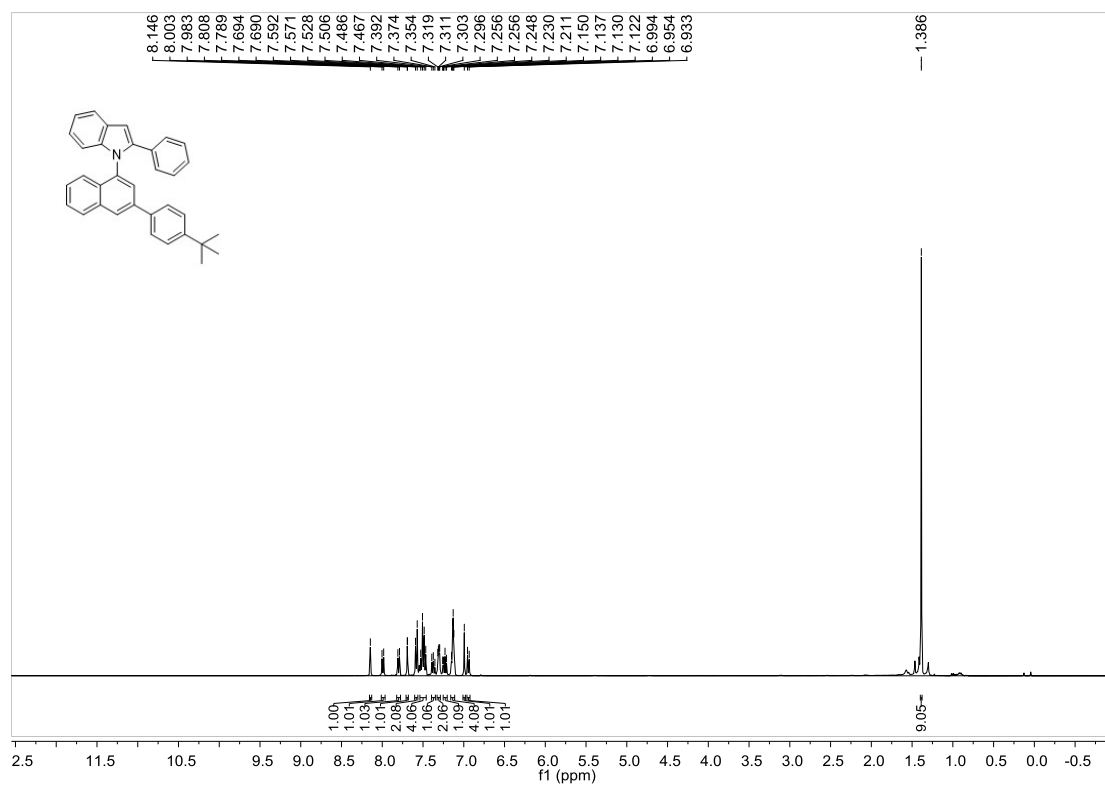

### <sup>13</sup>C NMR Spectrum of **33c**

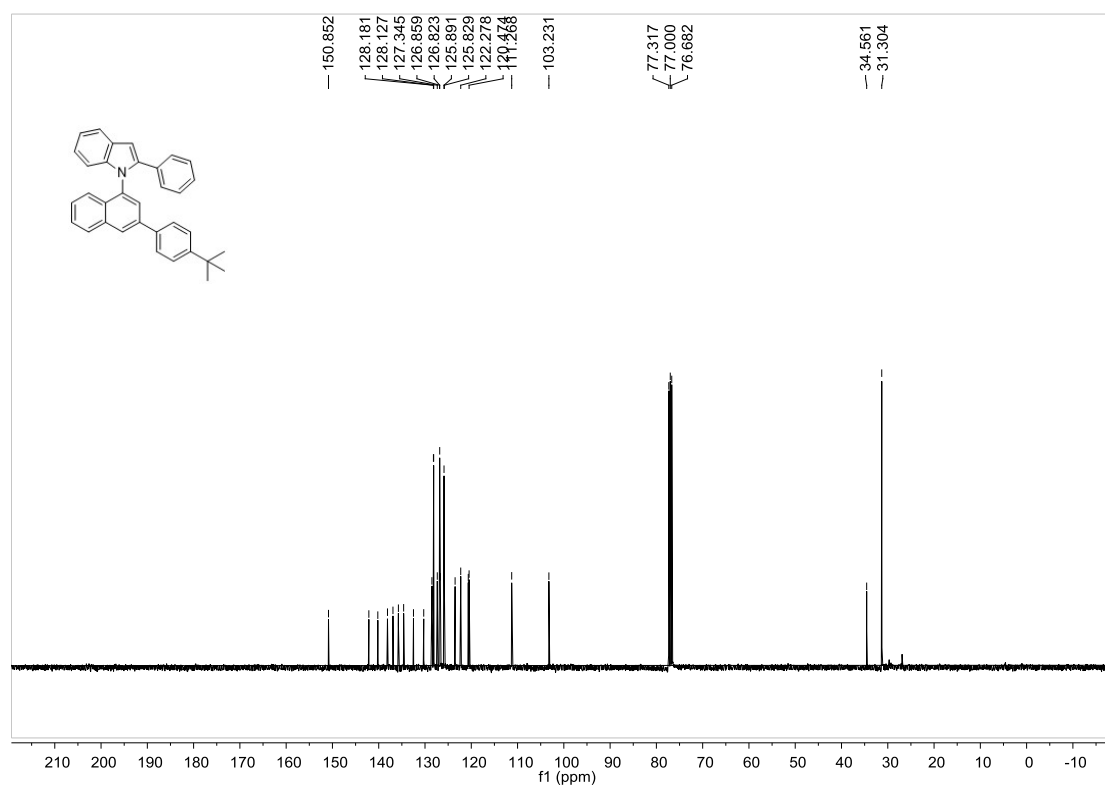

### <sup>1</sup>H NMR Spectrum of **34c**

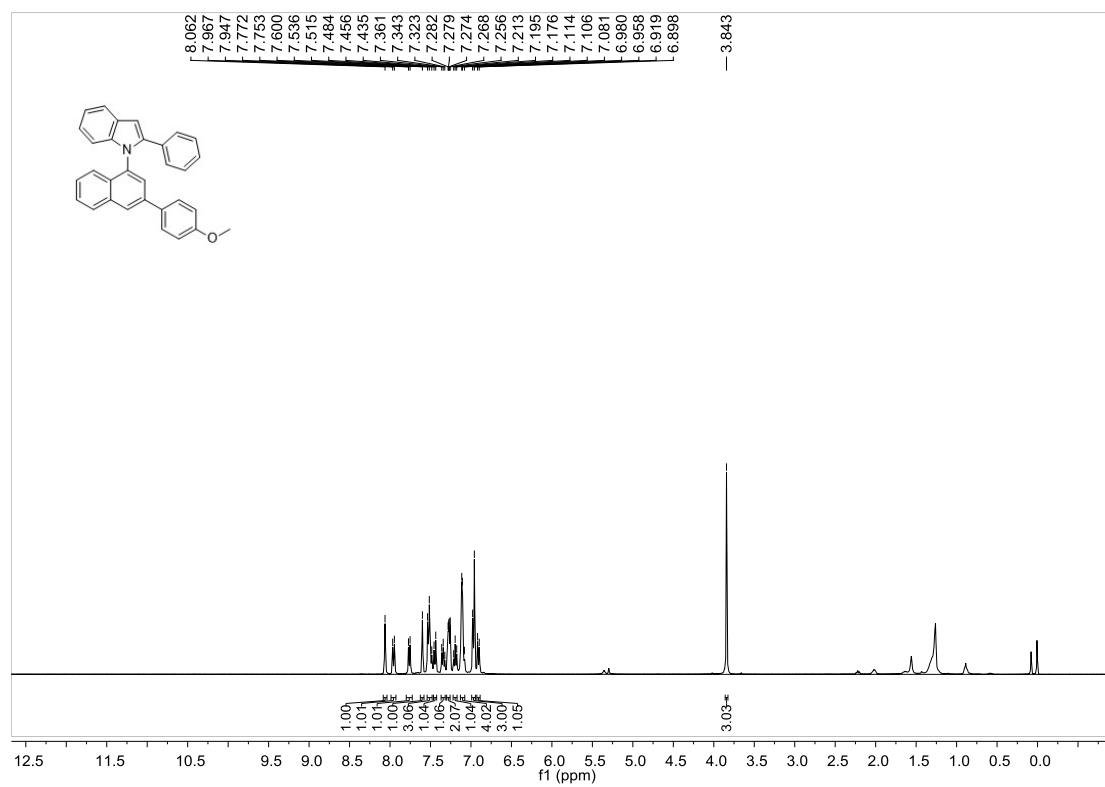

### <sup>13</sup>C NMR Spectrum of **34c**

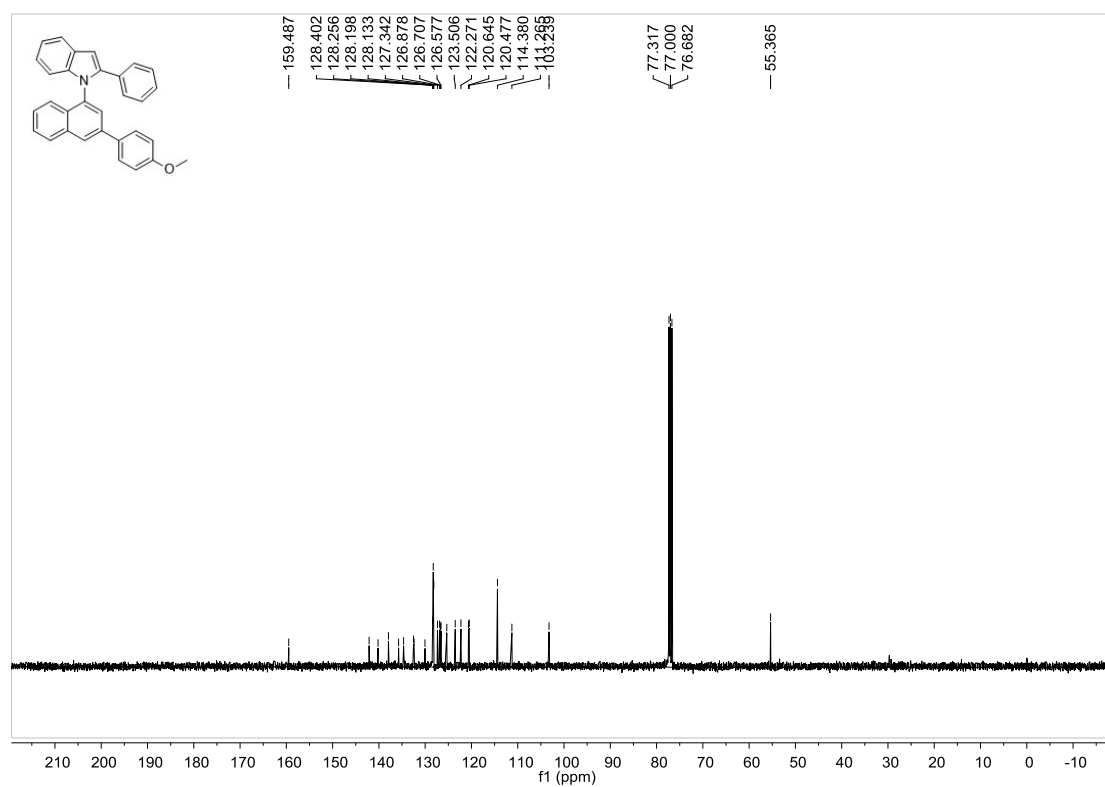

### <sup>1</sup>H NMR Spectrum of **35c**

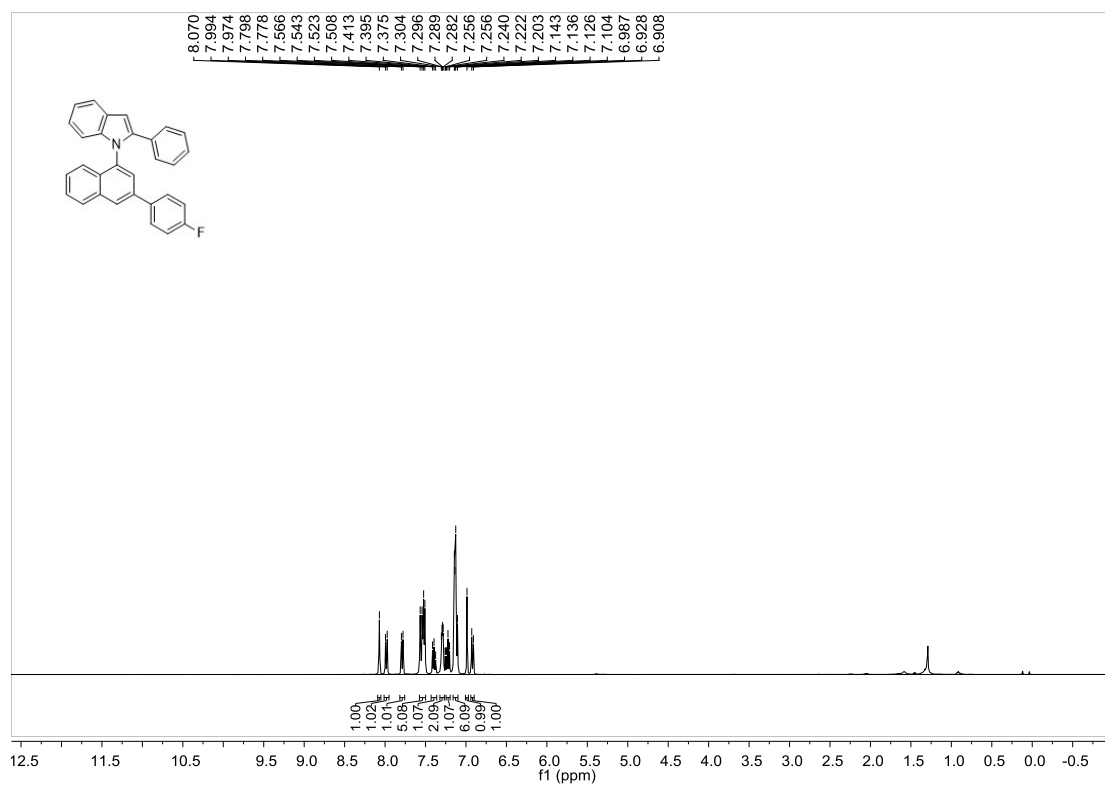

<sup>13</sup>C NMR Spectrum of **35c**

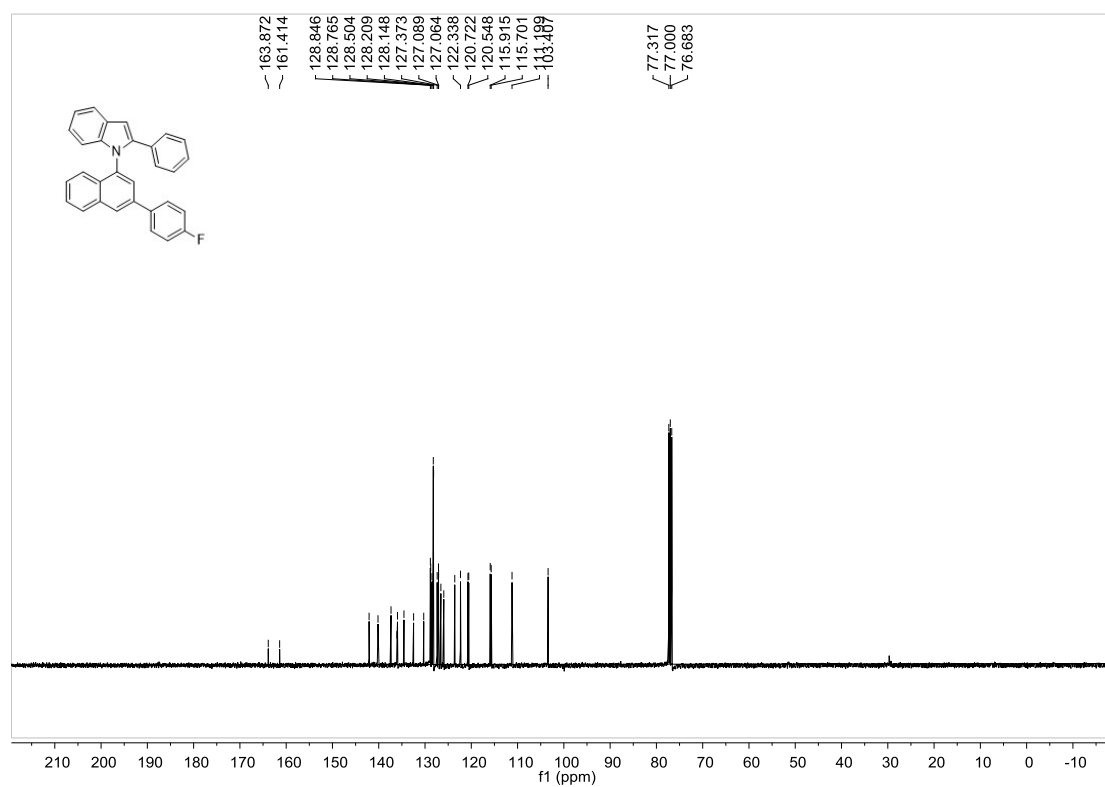

<sup>19</sup>F NMR Spectrum of **35c**

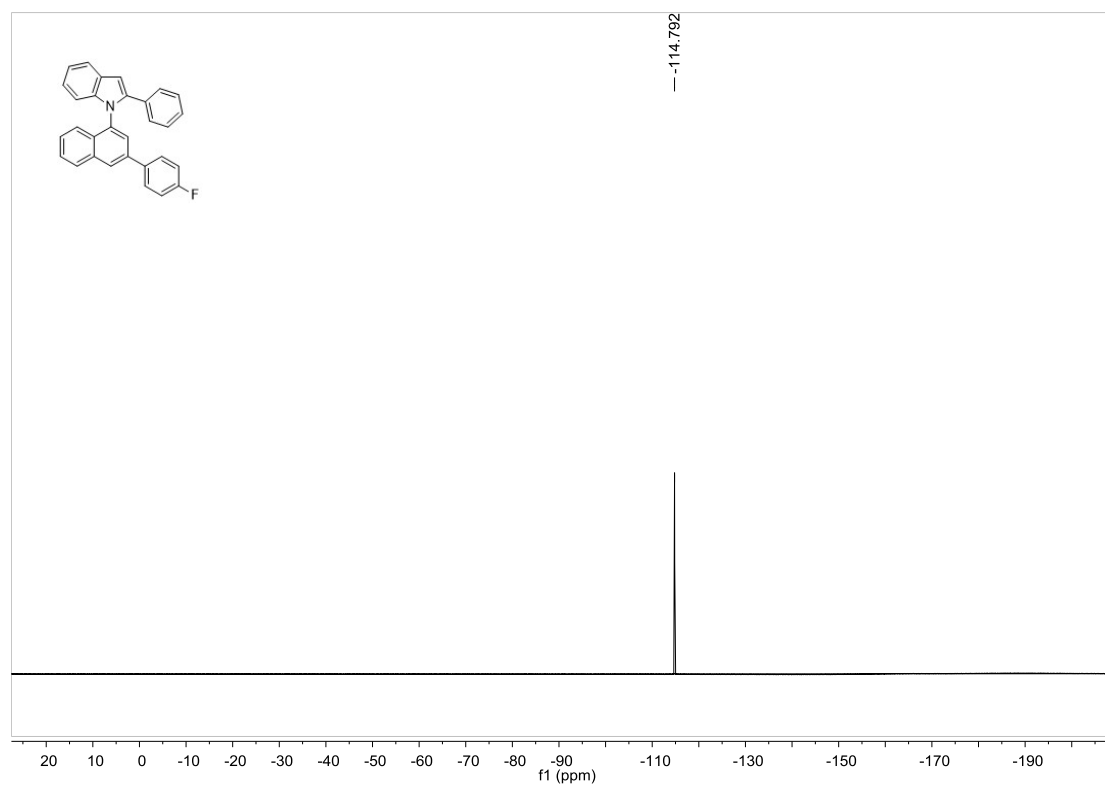

### <sup>1</sup>H NMR Spectrum of **36c**

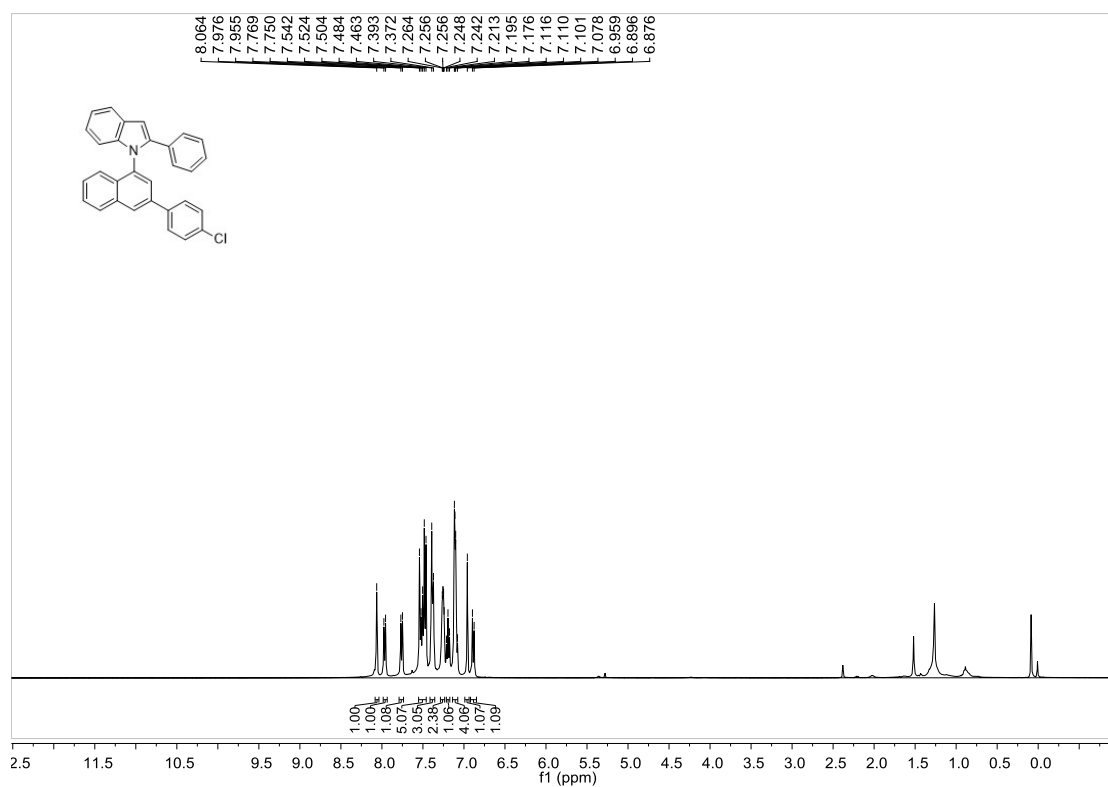

### <sup>13</sup>C NMR Spectrum of **36c**

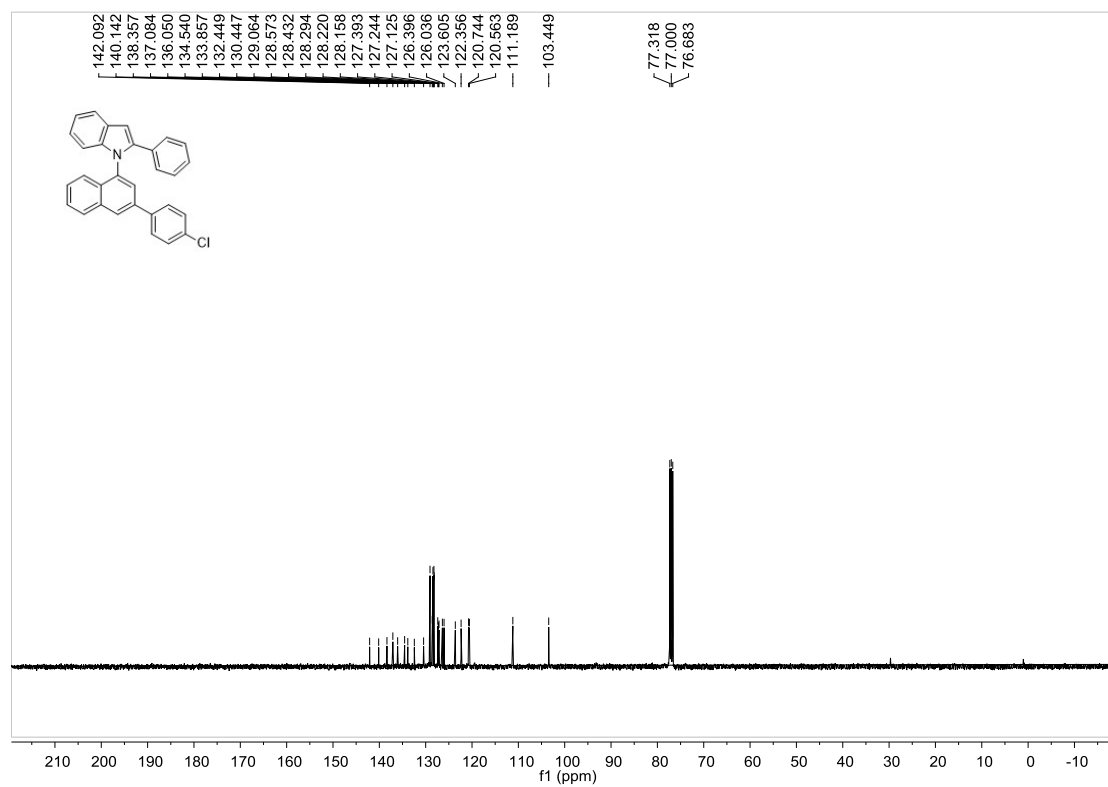



### <sup>1</sup>H NMR Spectrum of **37c**

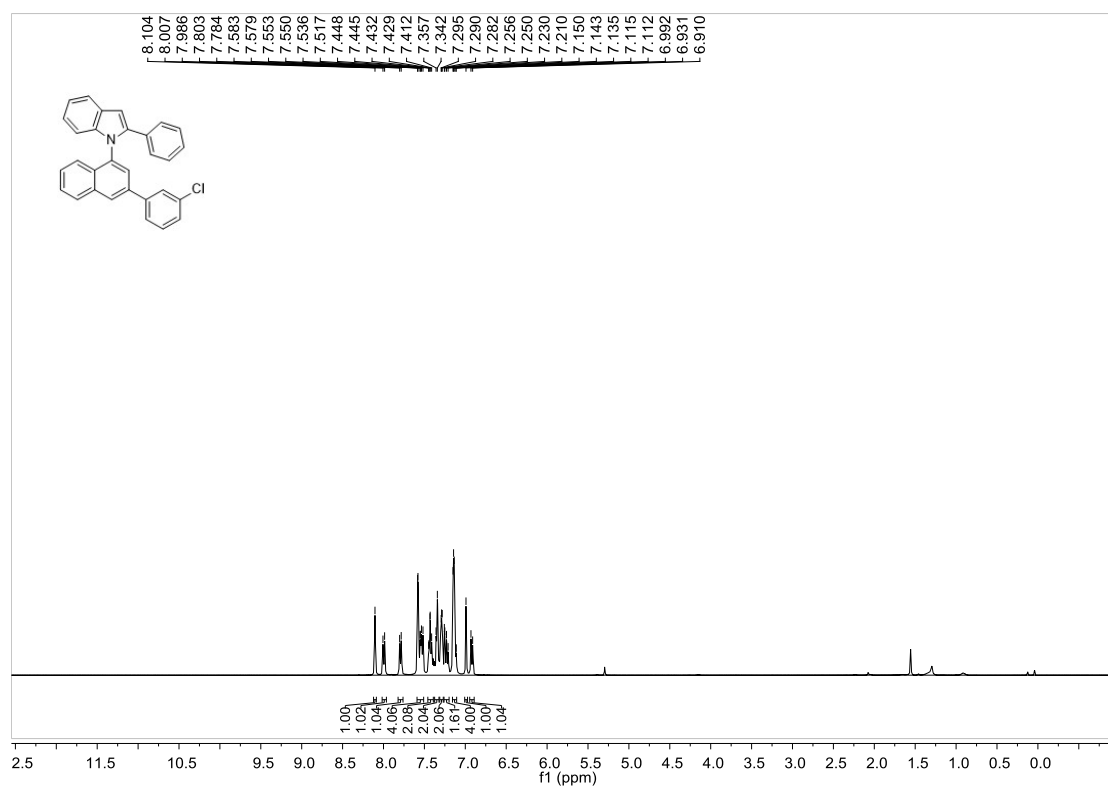

### <sup>13</sup>C NMR Spectrum of **37c**

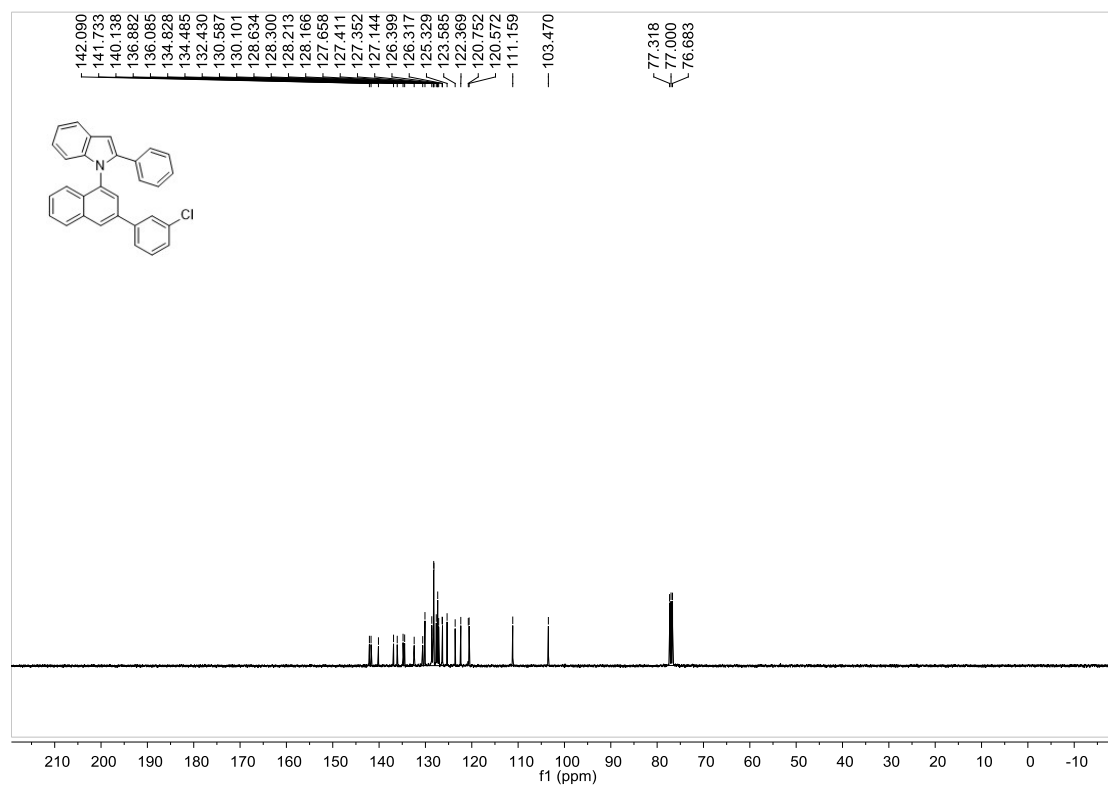

### <sup>1</sup>H NMR Spectrum of **38c**

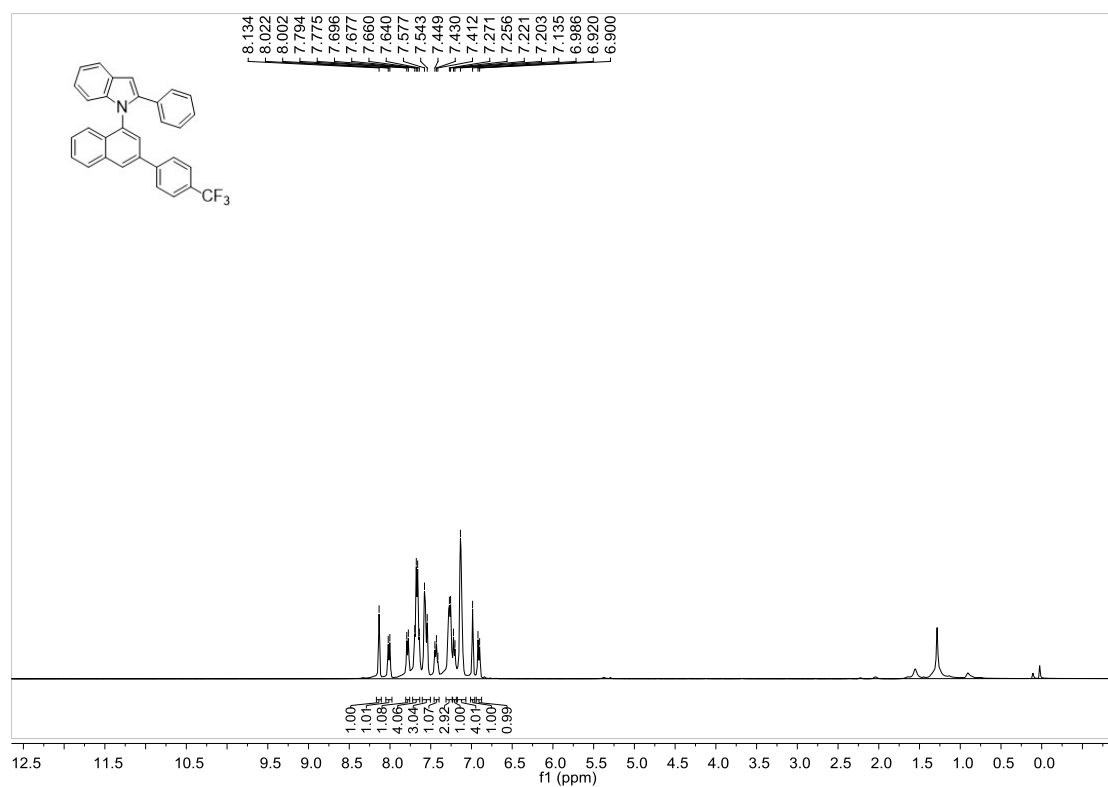

### <sup>13</sup>C NMR Spectrum of **38c**

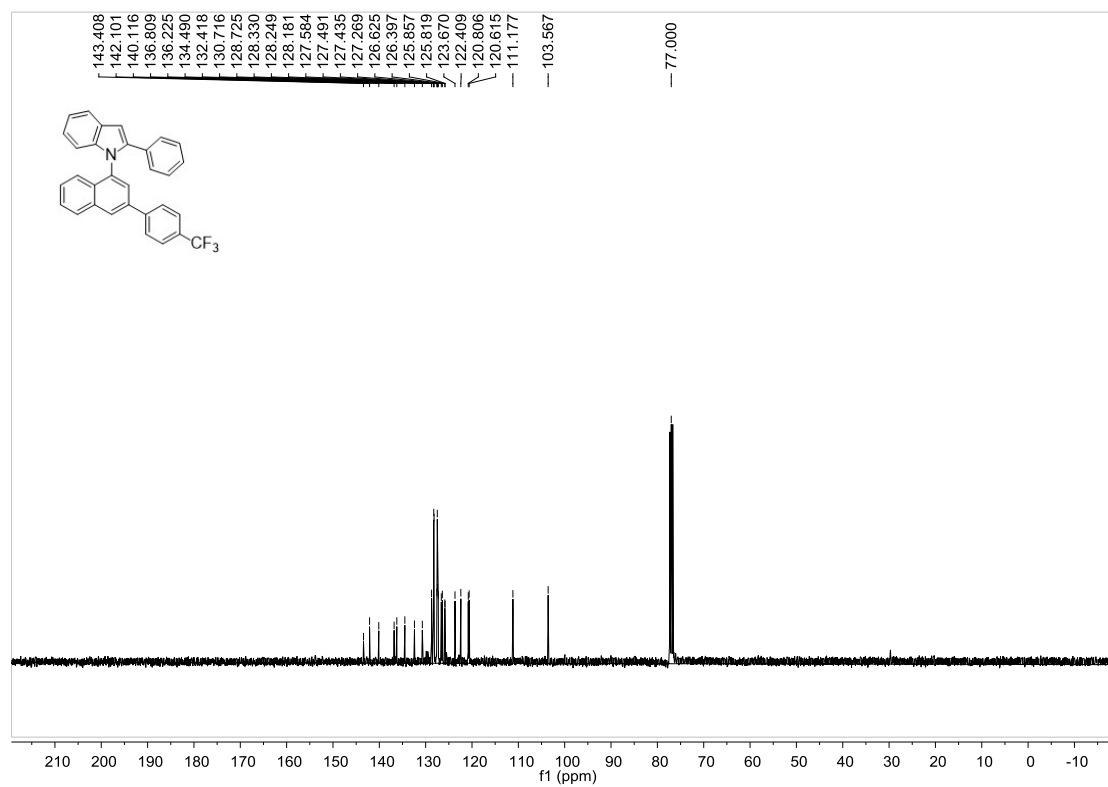

<sup>19</sup>F NMR Spectrum of **38c**

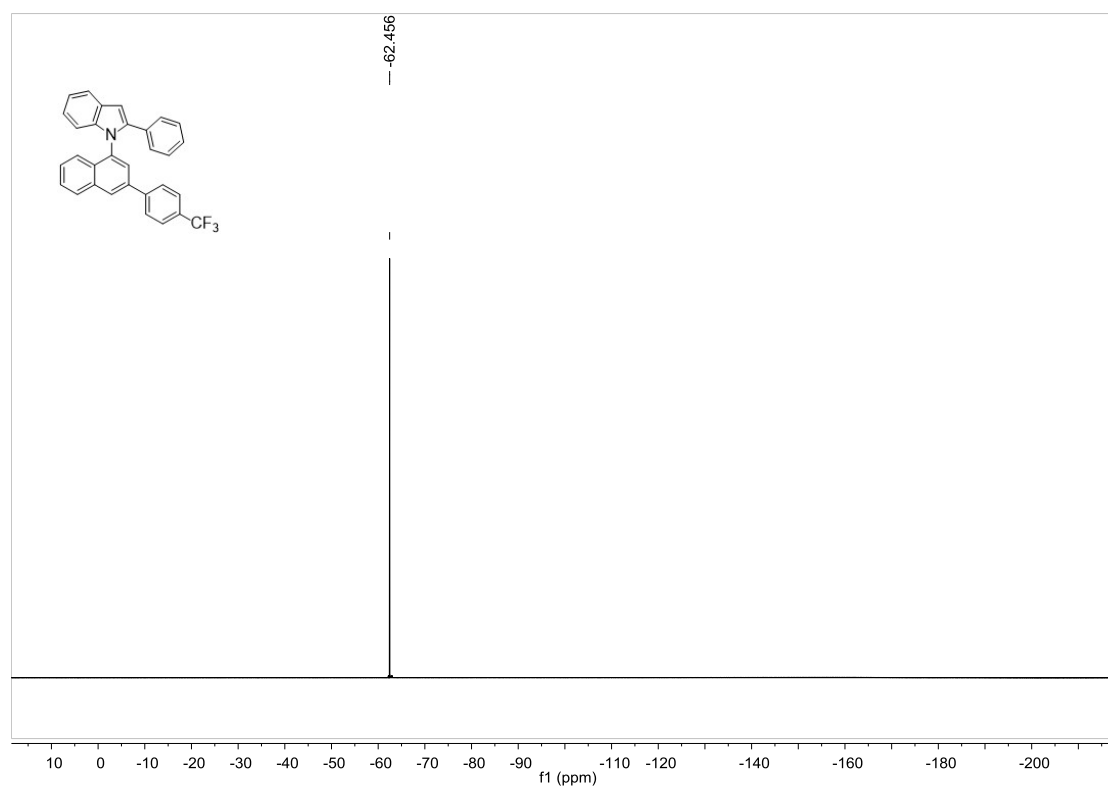

<sup>1</sup>H NMR Spectrum of **39c**

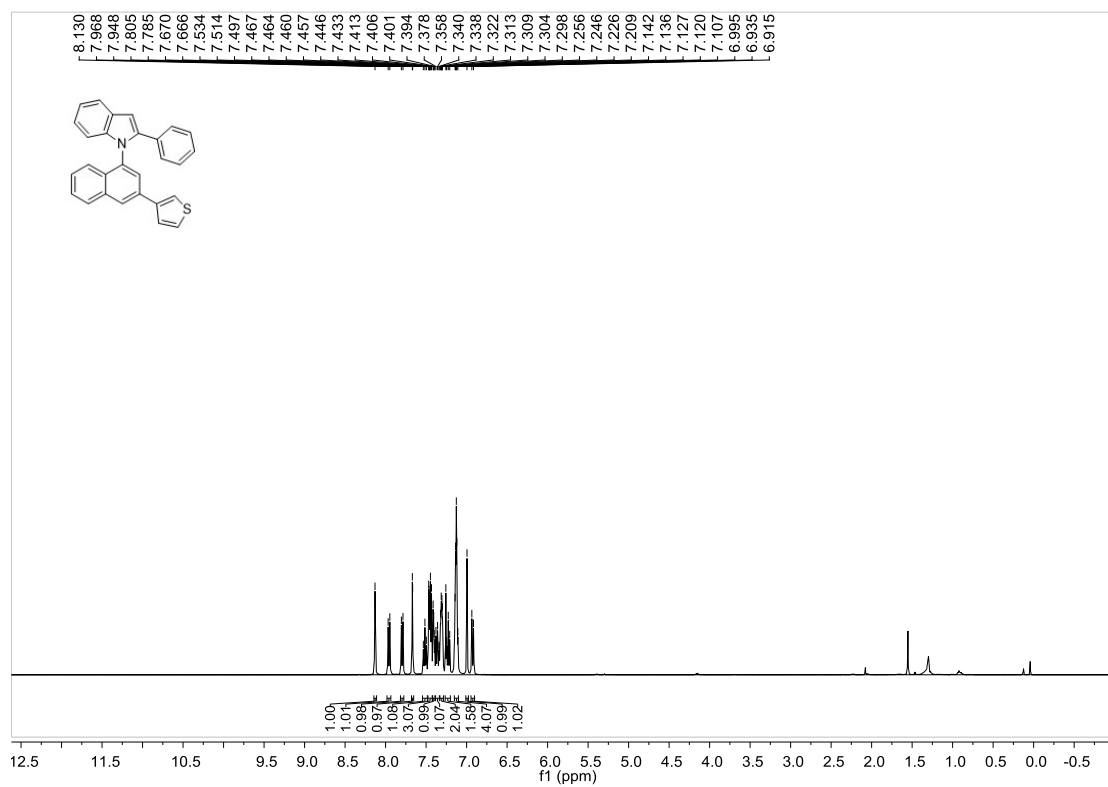

### <sup>13</sup>C NMR Spectrum of **39c**

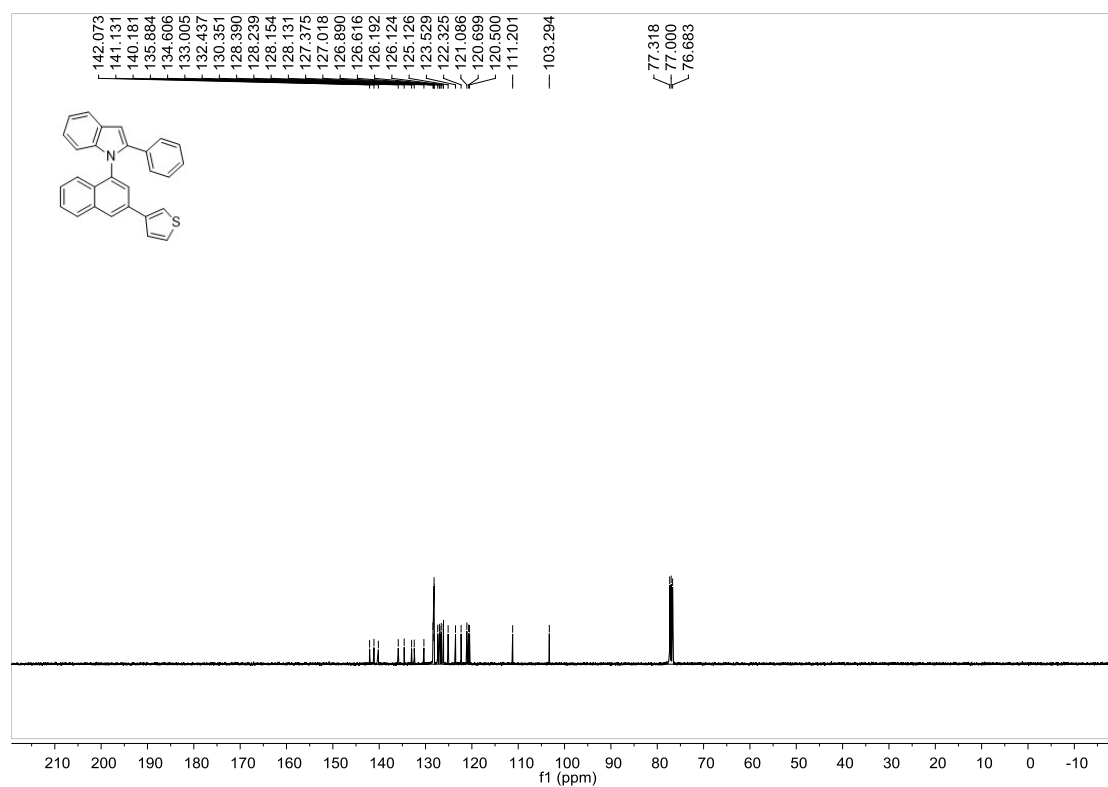

### <sup>1</sup>H NMR Spectrum of **40c**

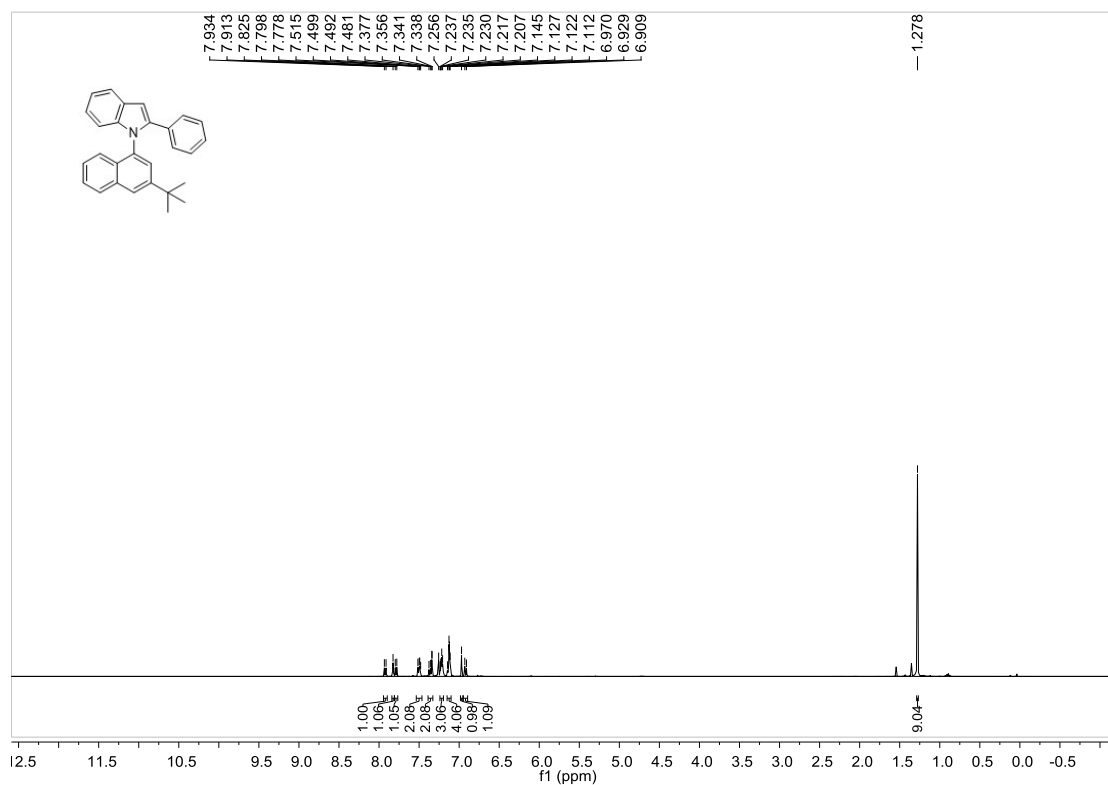

### <sup>13</sup>C NMR Spectrum of **40c**

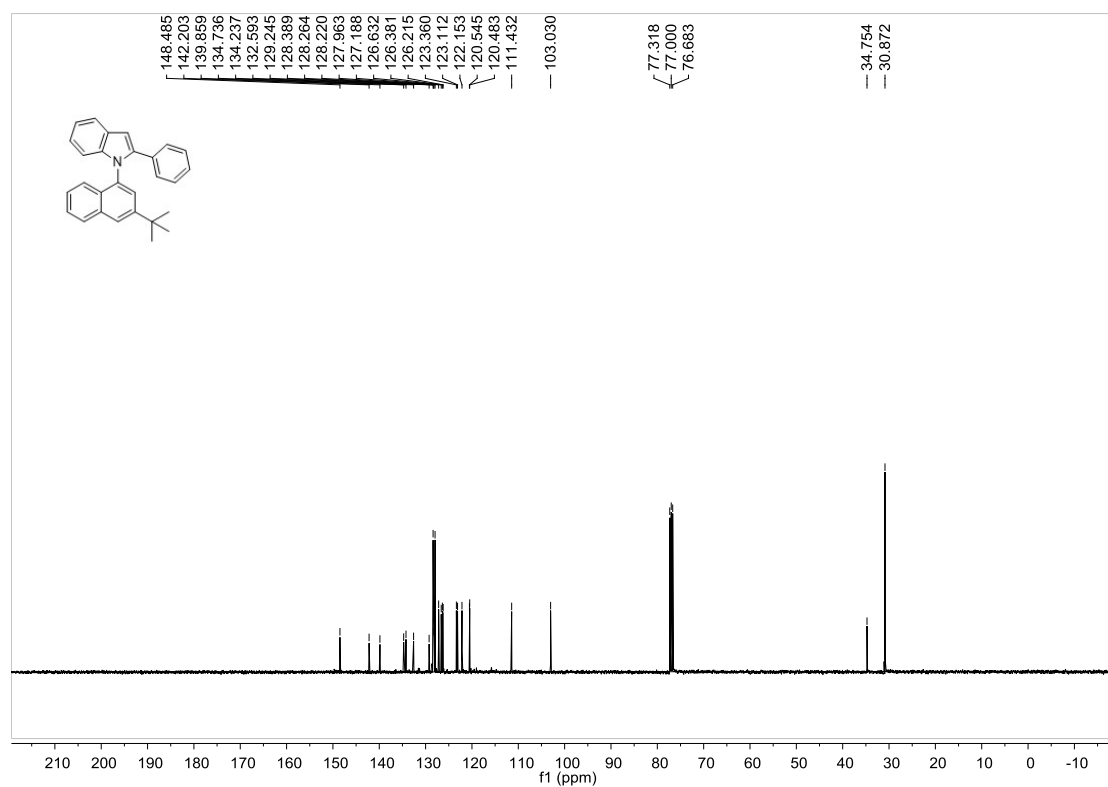

### <sup>1</sup>H NMR Spectrum of **41c**

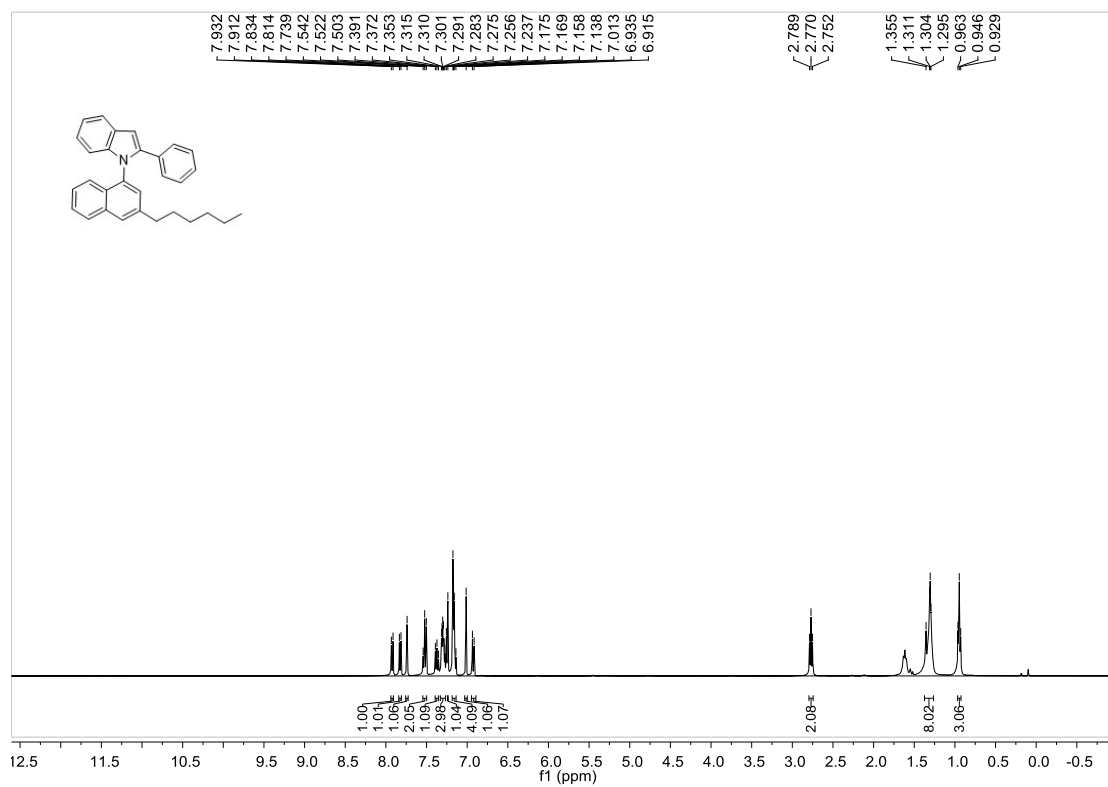

### <sup>13</sup>C NMR Spectrum of **41c**

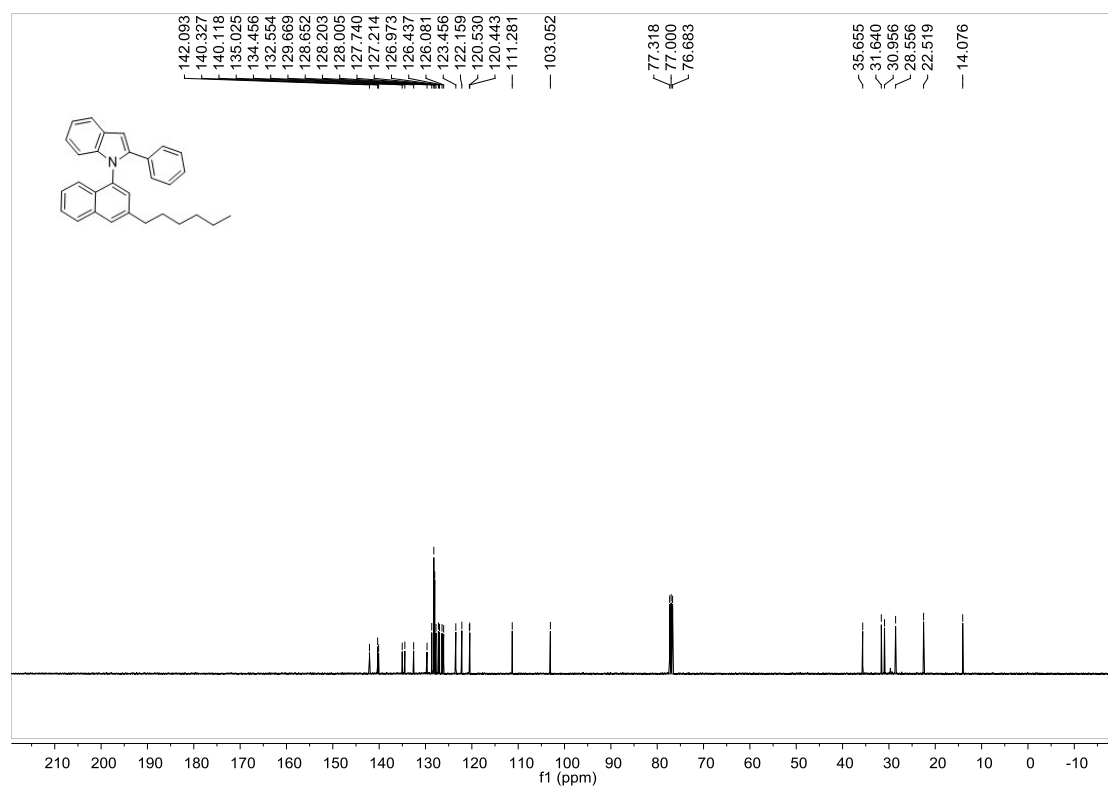

### <sup>1</sup>H NMR Spectrum of **42c**

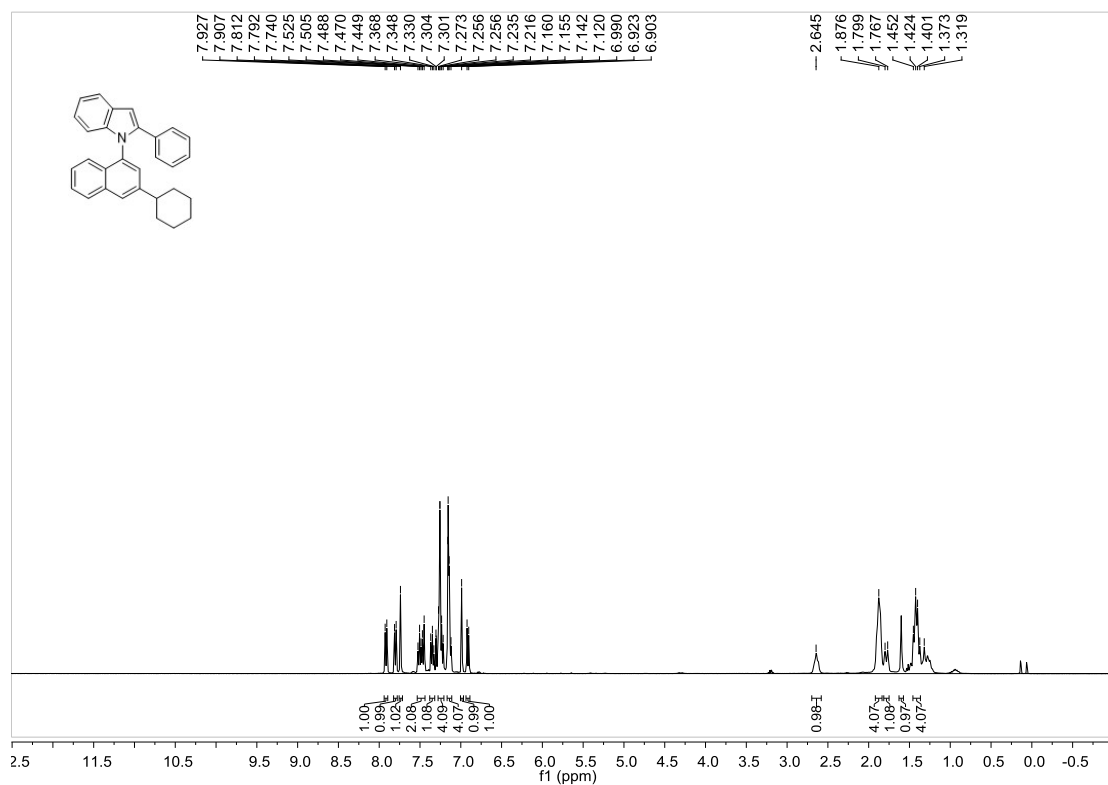

### <sup>13</sup>C NMR Spectrum of **42c**

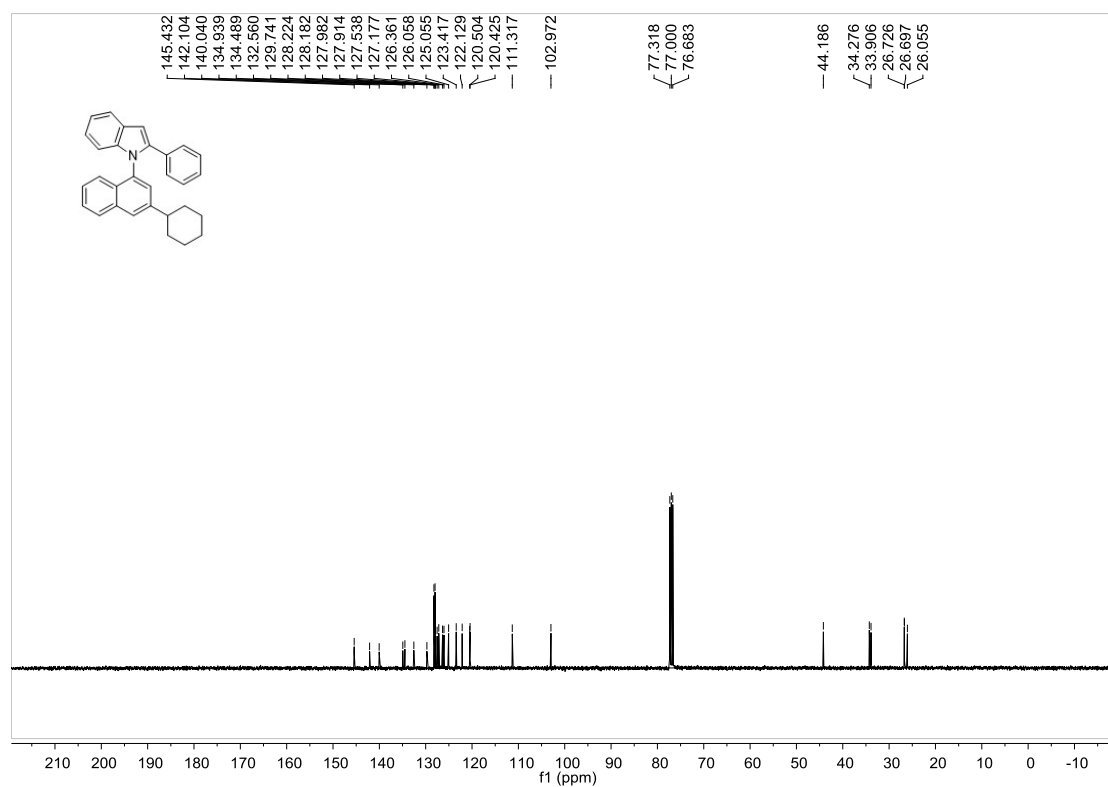

### <sup>1</sup>H NMR Spectrum of **43c**

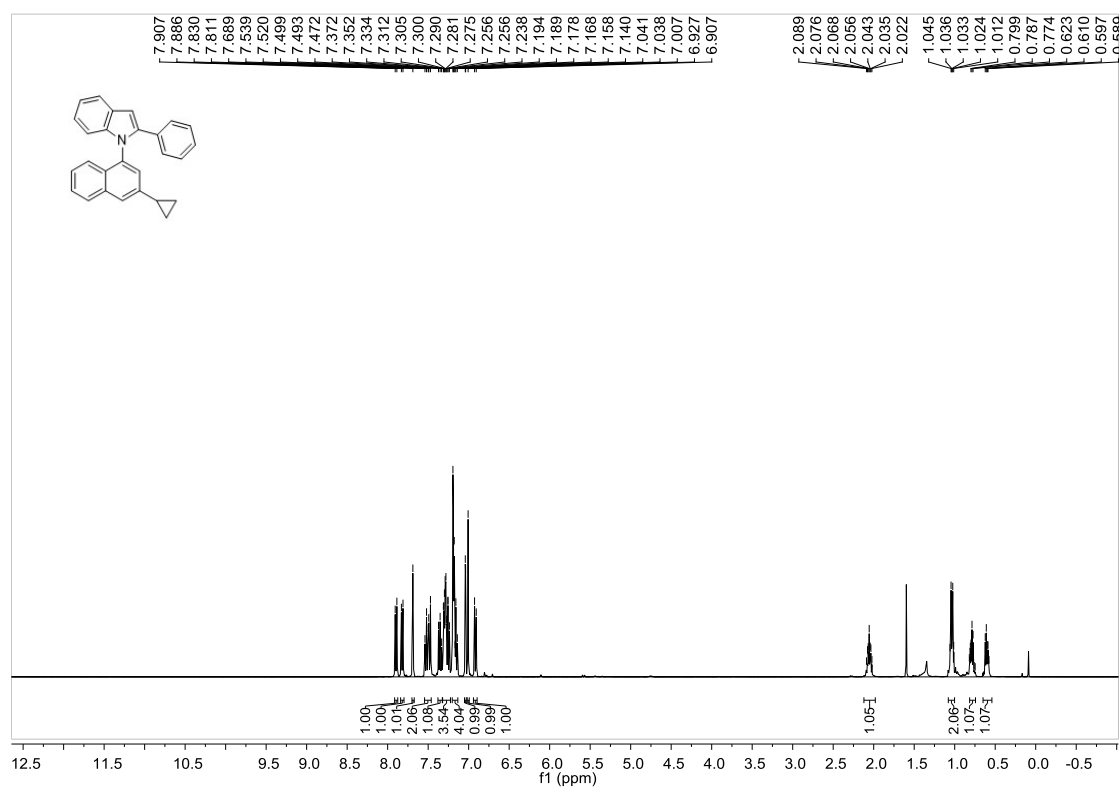

### <sup>13</sup>C NMR Spectrum of **43c**

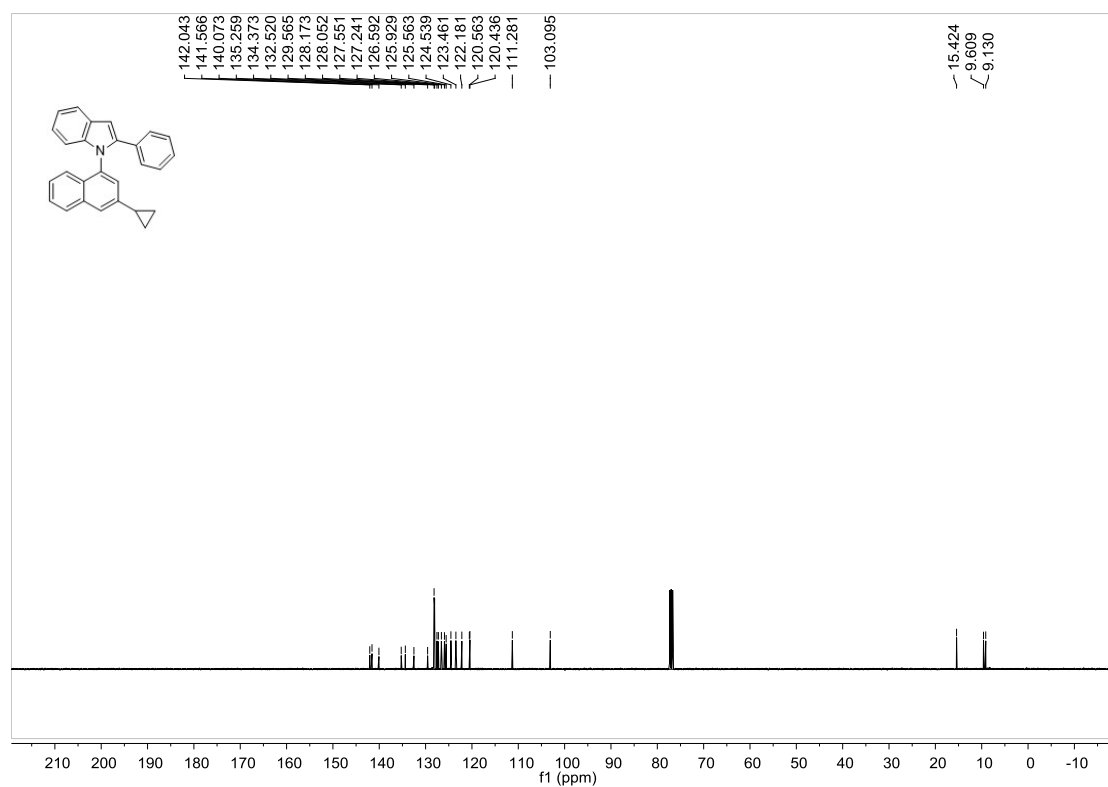

### <sup>1</sup>H NMR Spectrum of **44c**

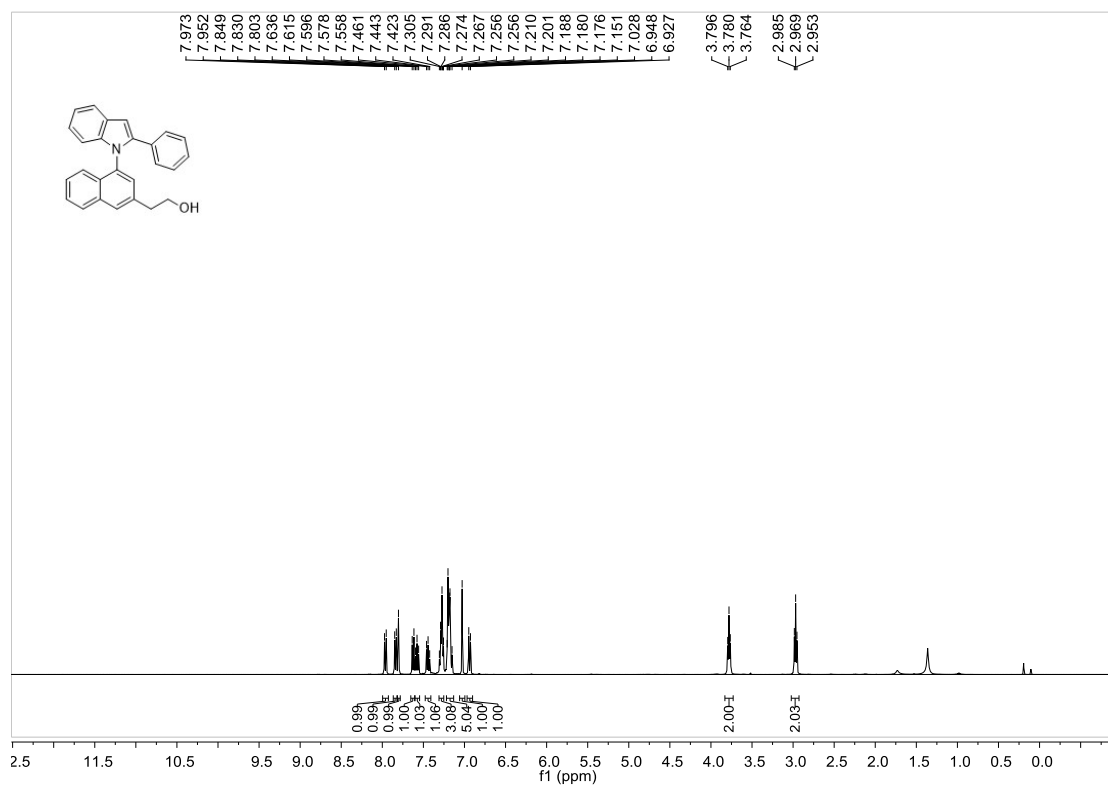



### <sup>13</sup>C NMR Spectrum of **44c**

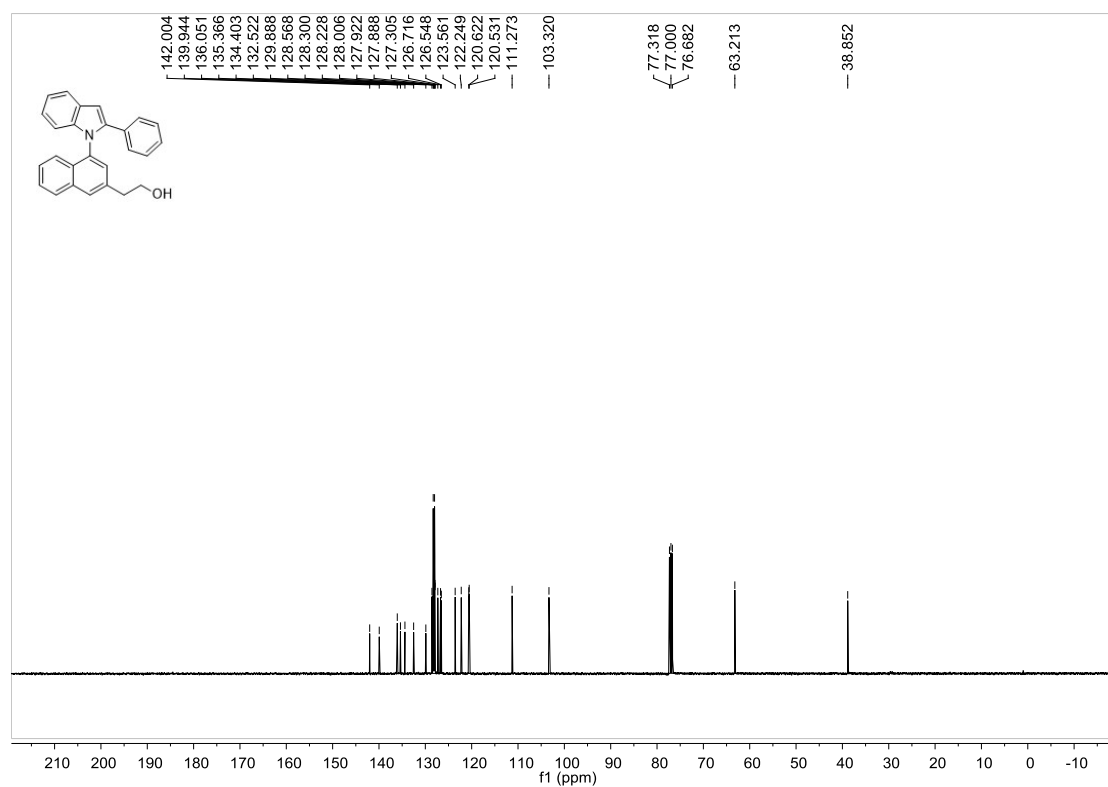

### <sup>1</sup>H NMR Spectrum of **45c**

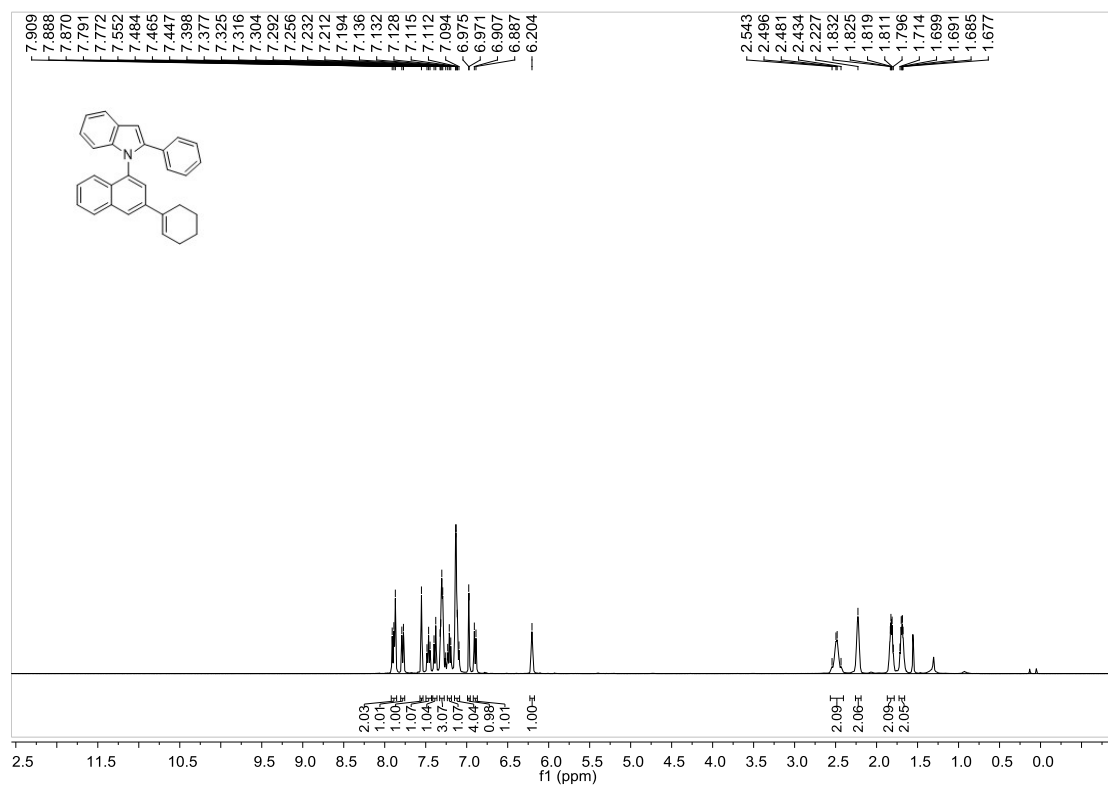

### <sup>13</sup>C NMR Spectrum of 45c

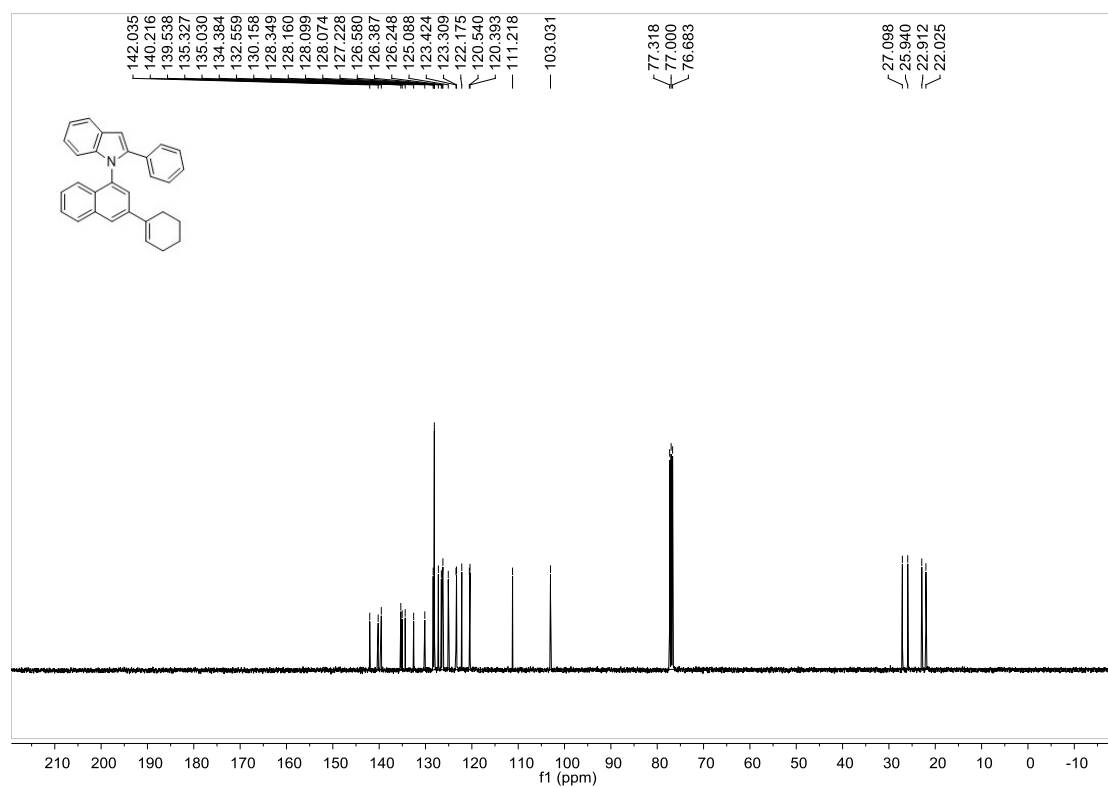

### <sup>1</sup>H NMR Spectrum of 46c

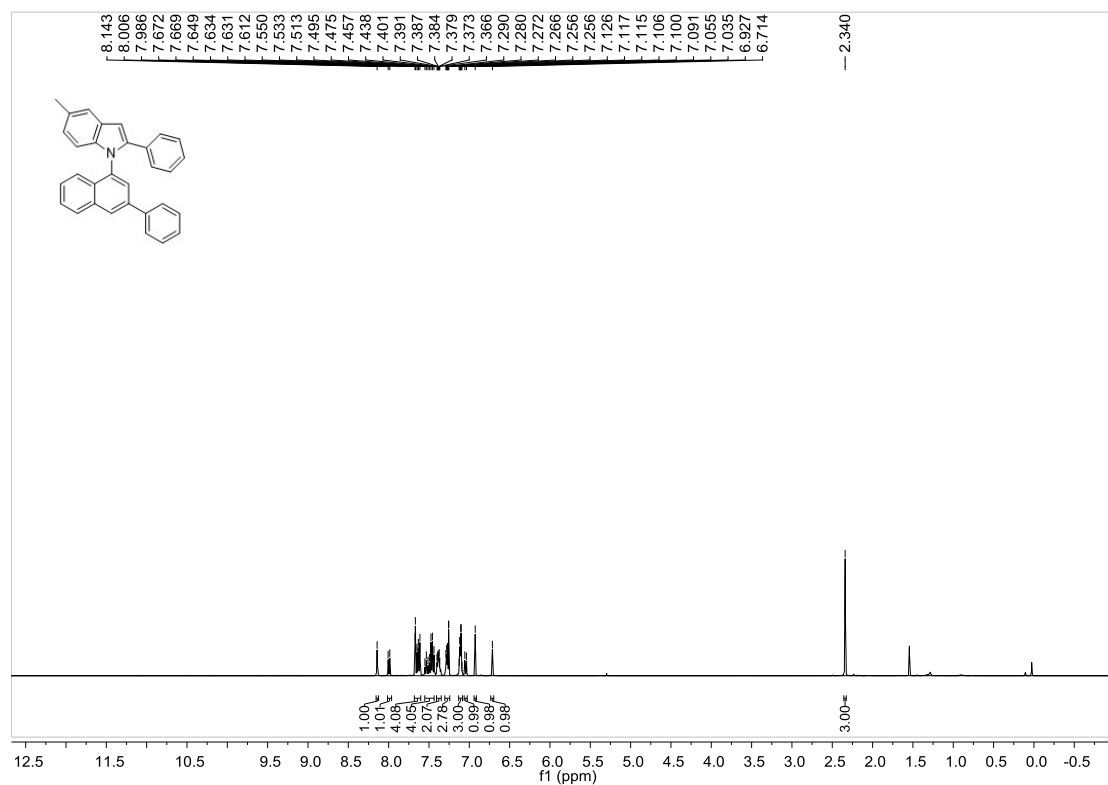

### <sup>13</sup>C NMR Spectrum of **46c**

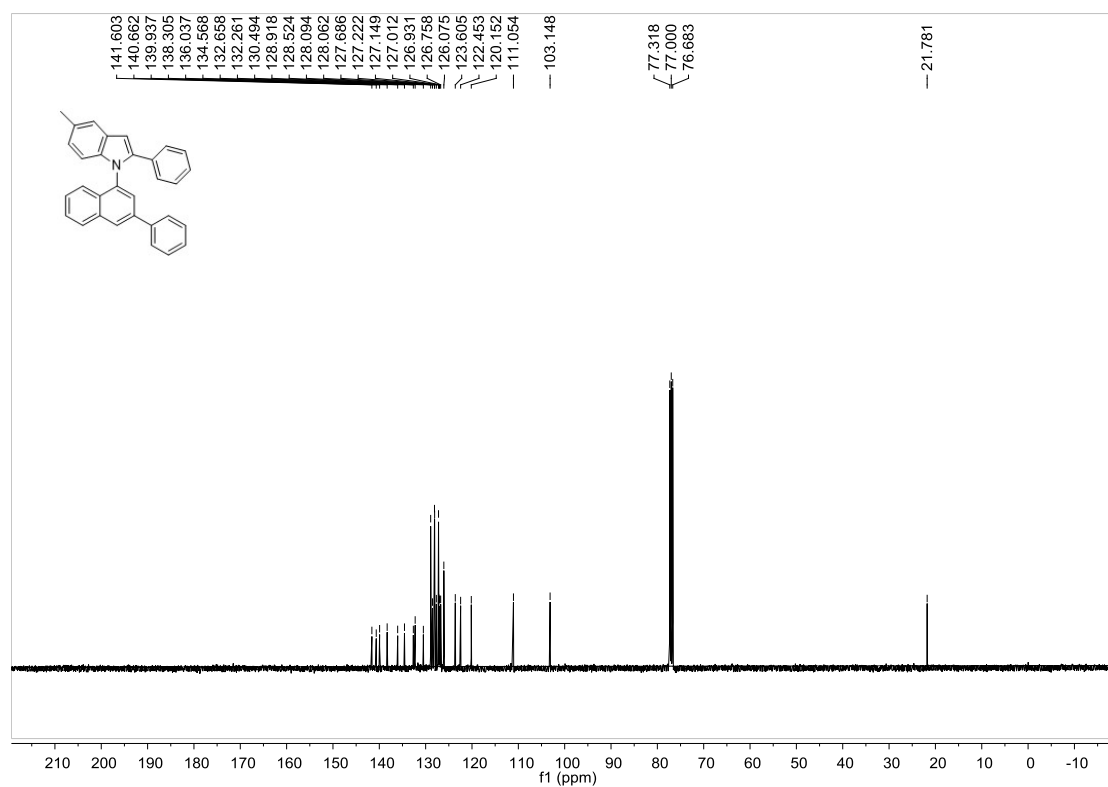

### <sup>1</sup>H NMR Spectrum of **47c**

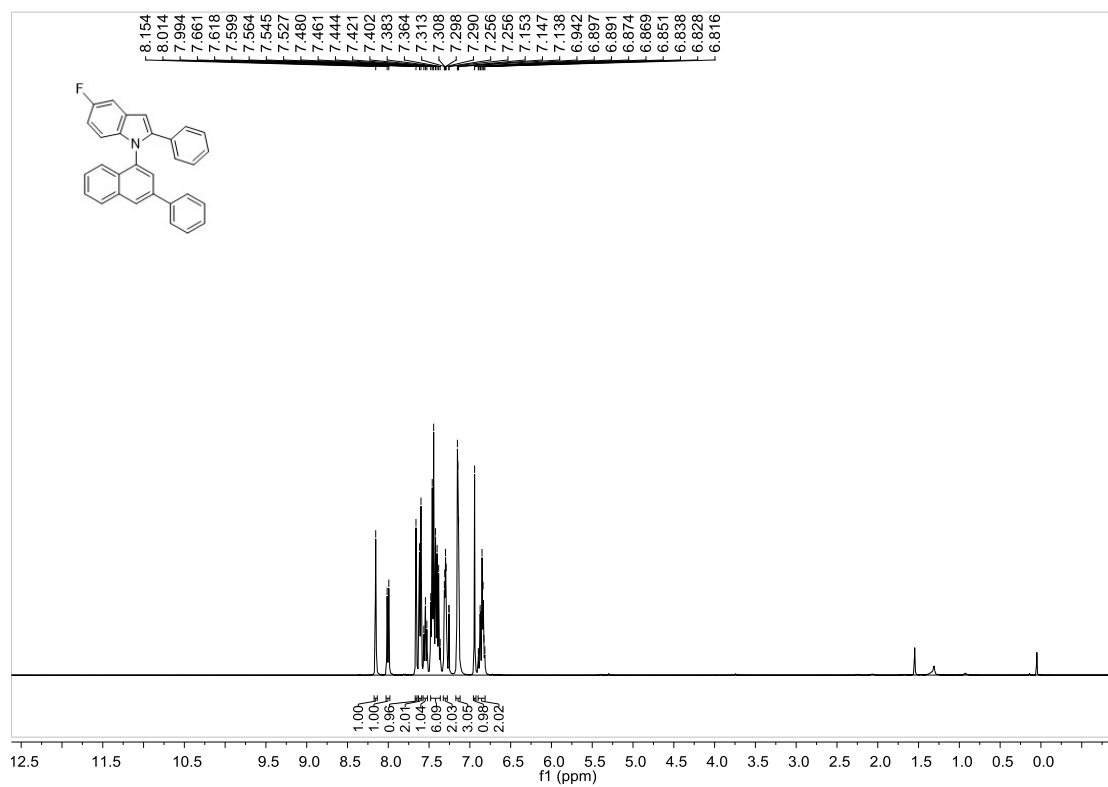

<sup>13</sup>C NMR Spectrum of **47c**

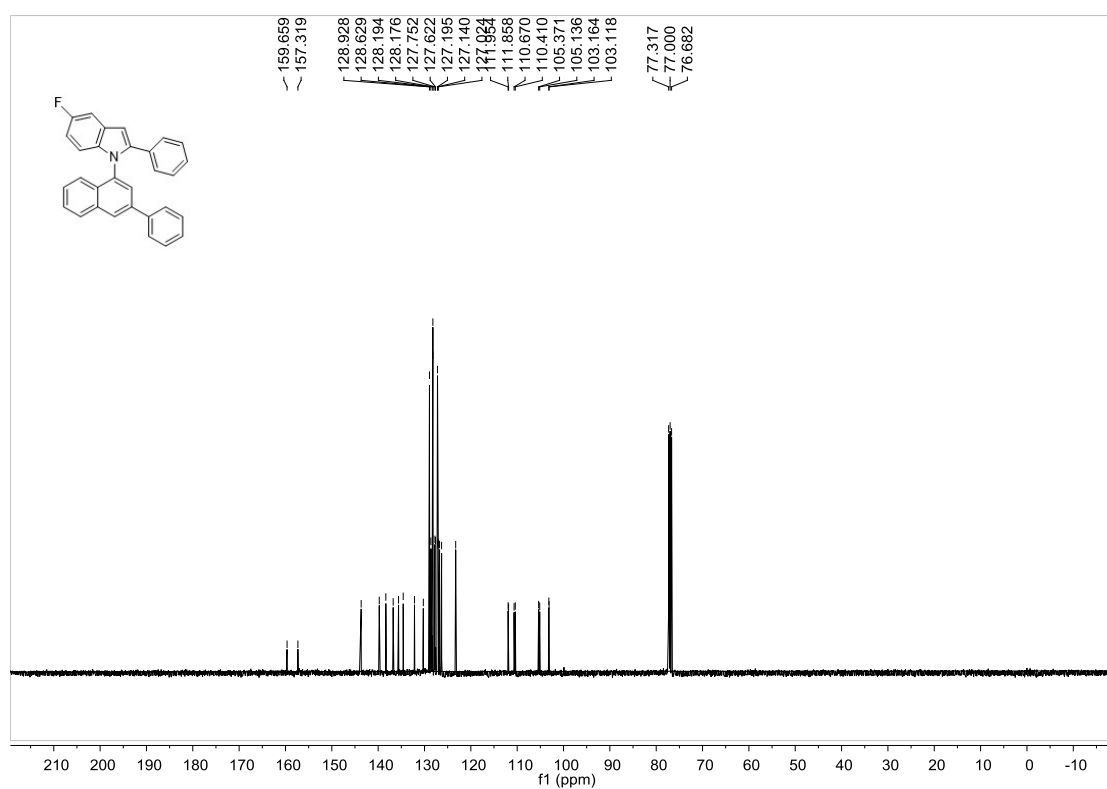

<sup>19</sup>F NMR Spectrum of **47c**

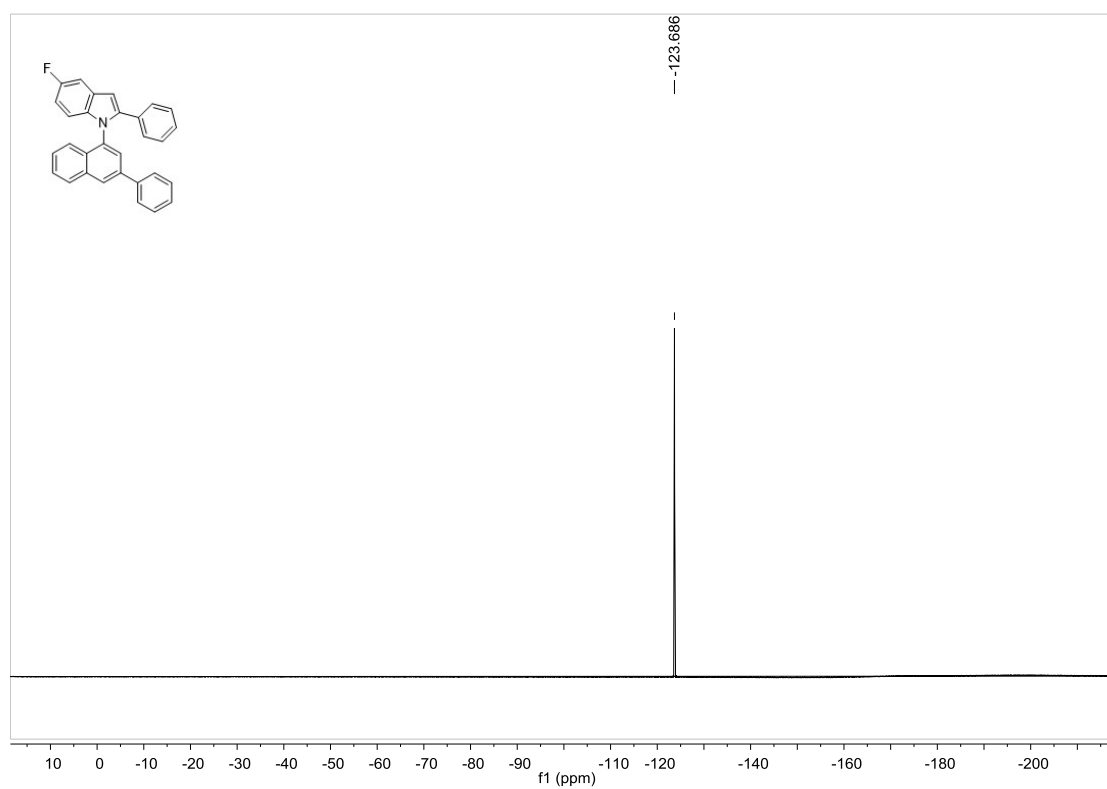

### <sup>1</sup>H NMR Spectrum of **48c**

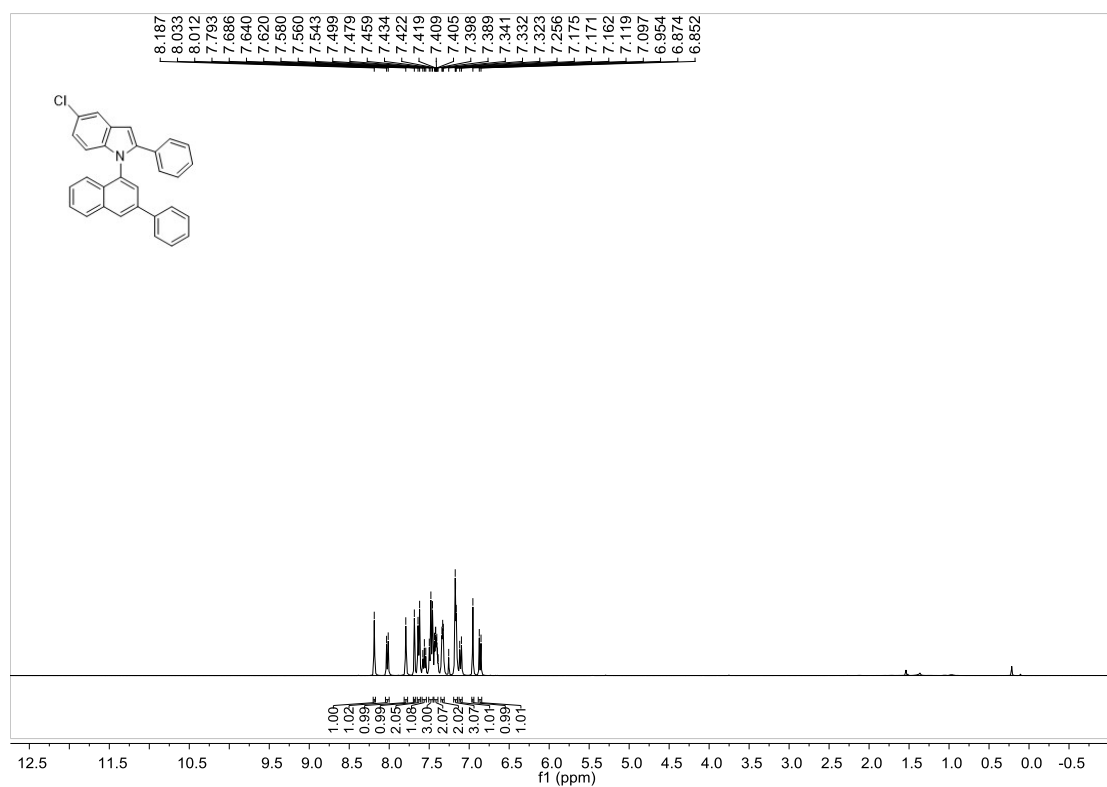

### <sup>13</sup>C NMR Spectrum of **48c**

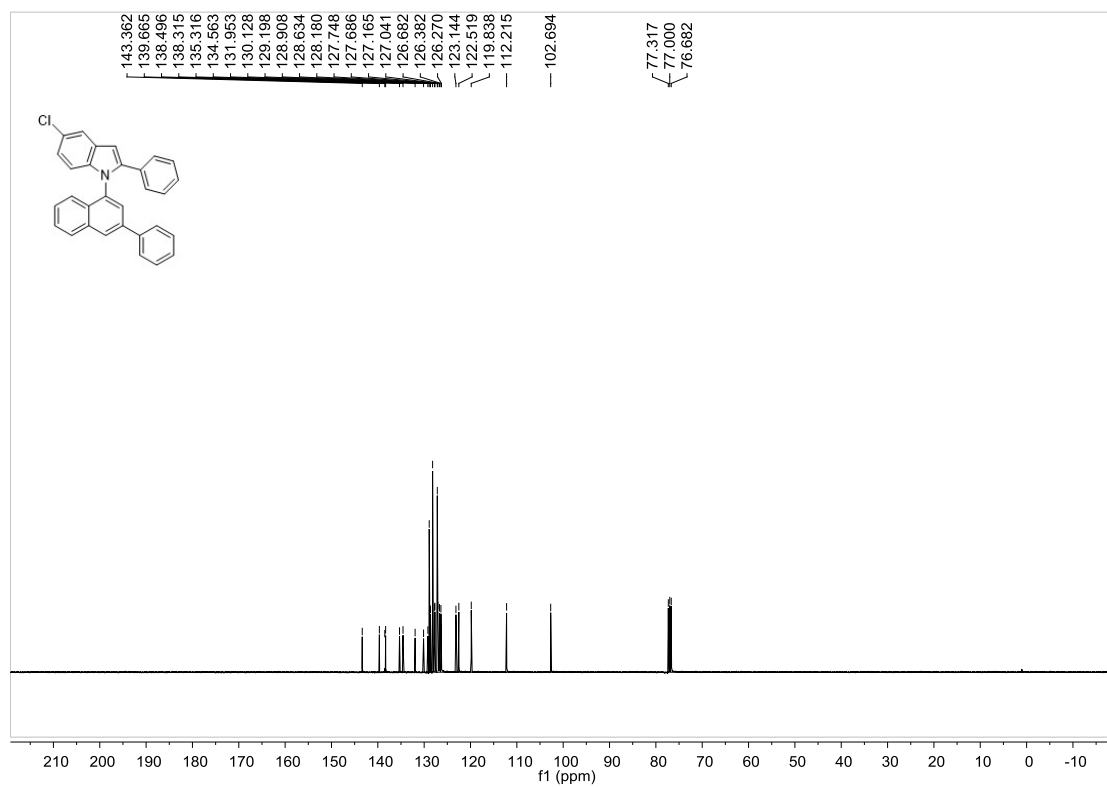

### <sup>1</sup>H NMR Spectrum of **49c**

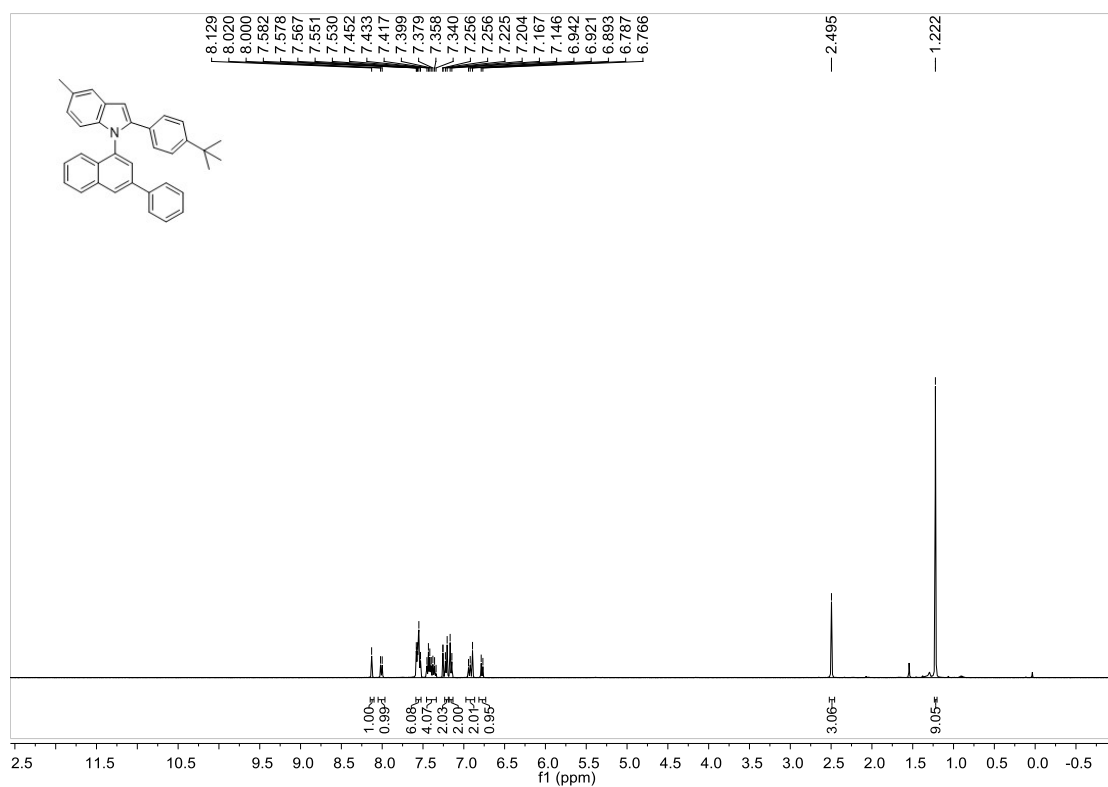

### <sup>13</sup>C NMR Spectrum of **49c**

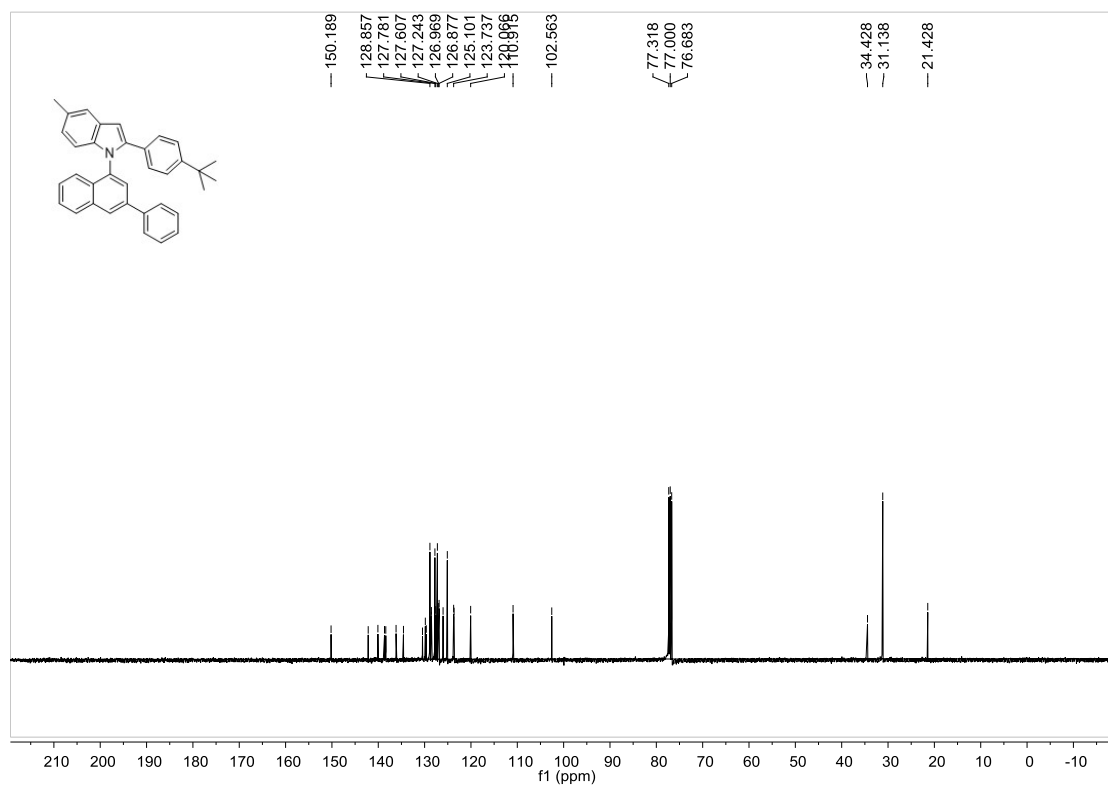

### <sup>1</sup>H NMR Spectrum of 50c

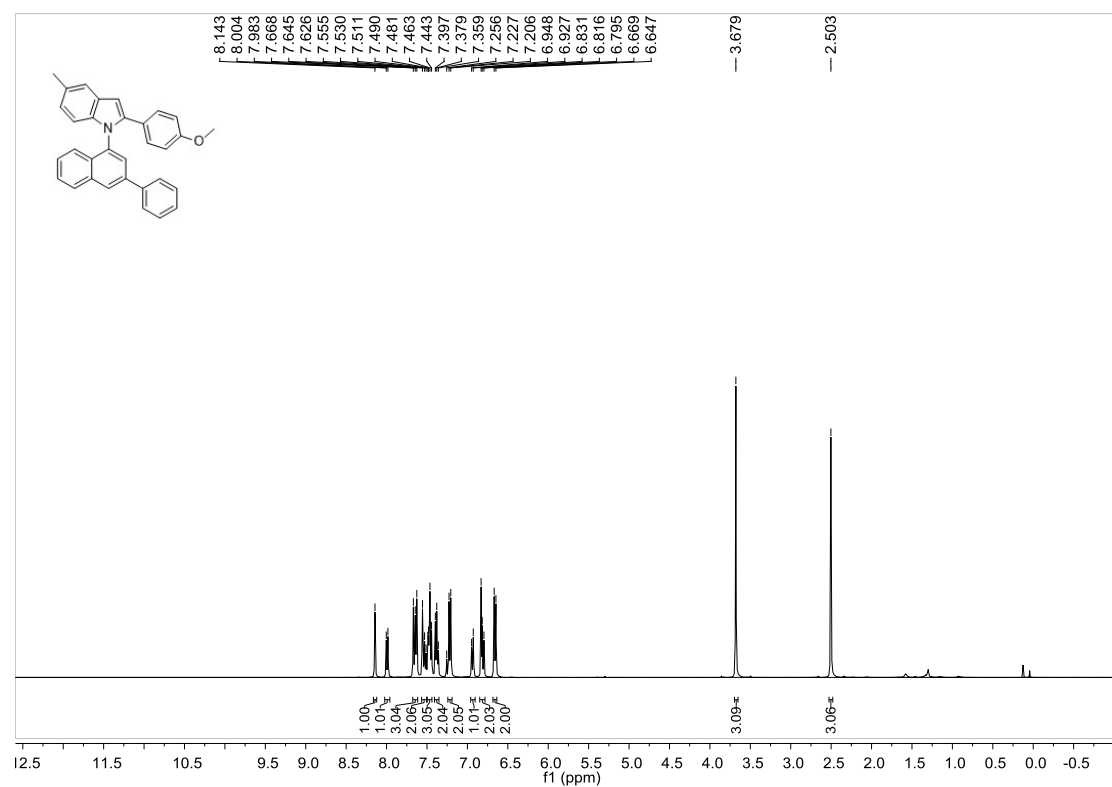

### <sup>13</sup>C NMR Spectrum of 50c

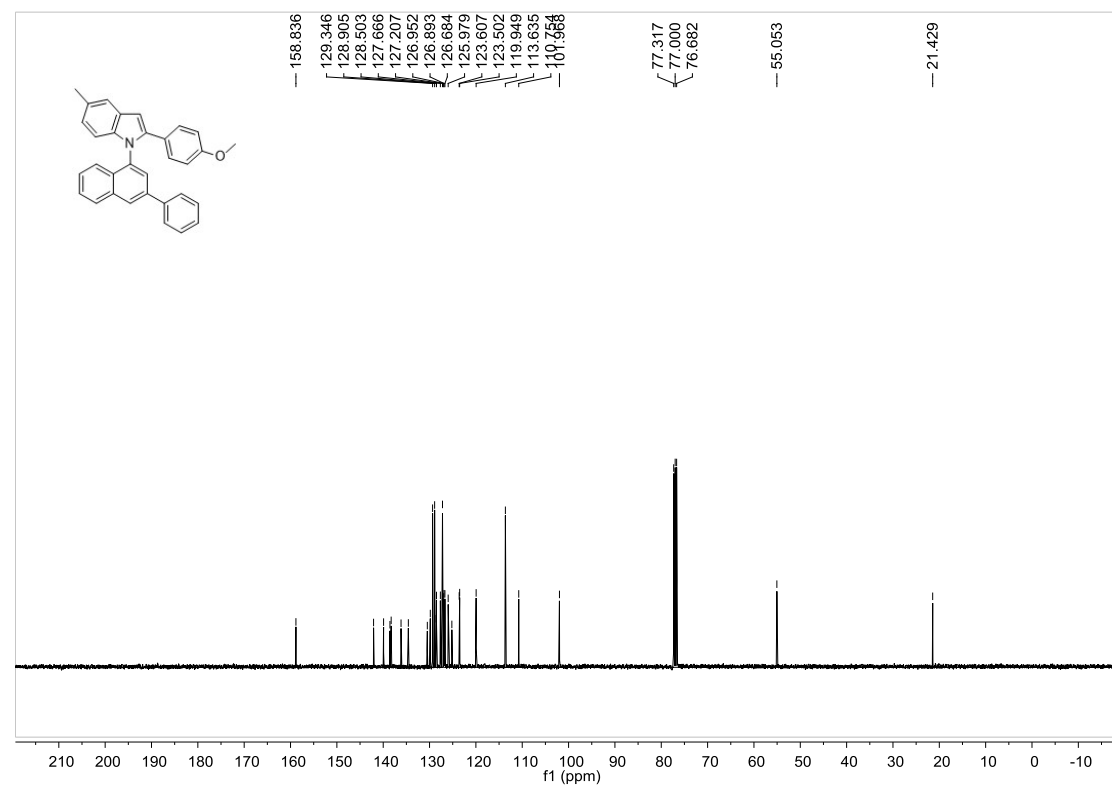

### <sup>1</sup>H NMR Spectrum of **51c**

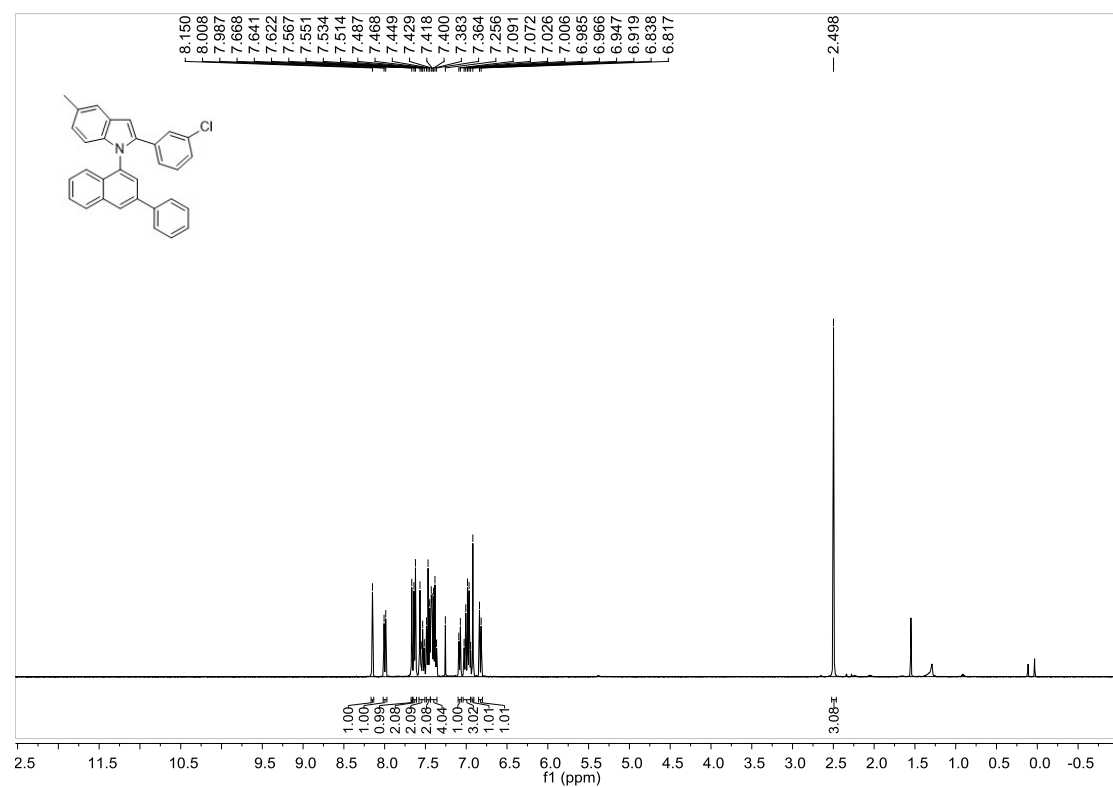

### <sup>13</sup>C NMR Spectrum of **51c**

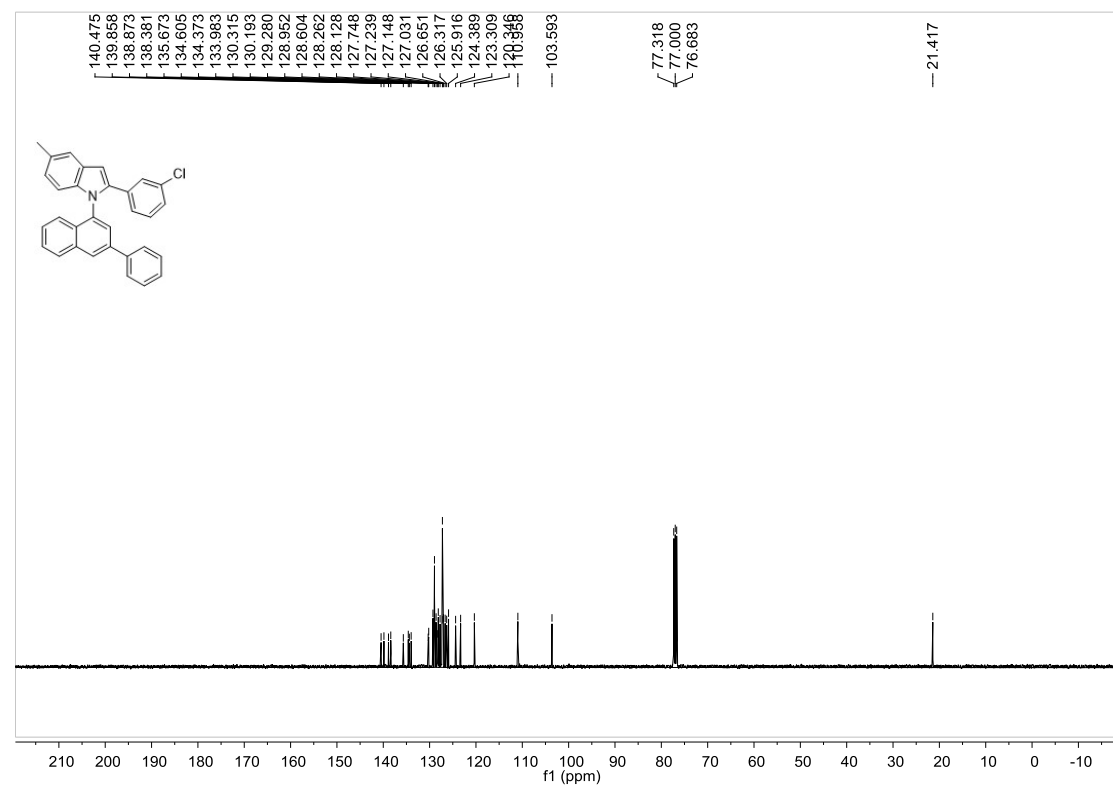



### <sup>1</sup>H NMR Spectrum of **52c**

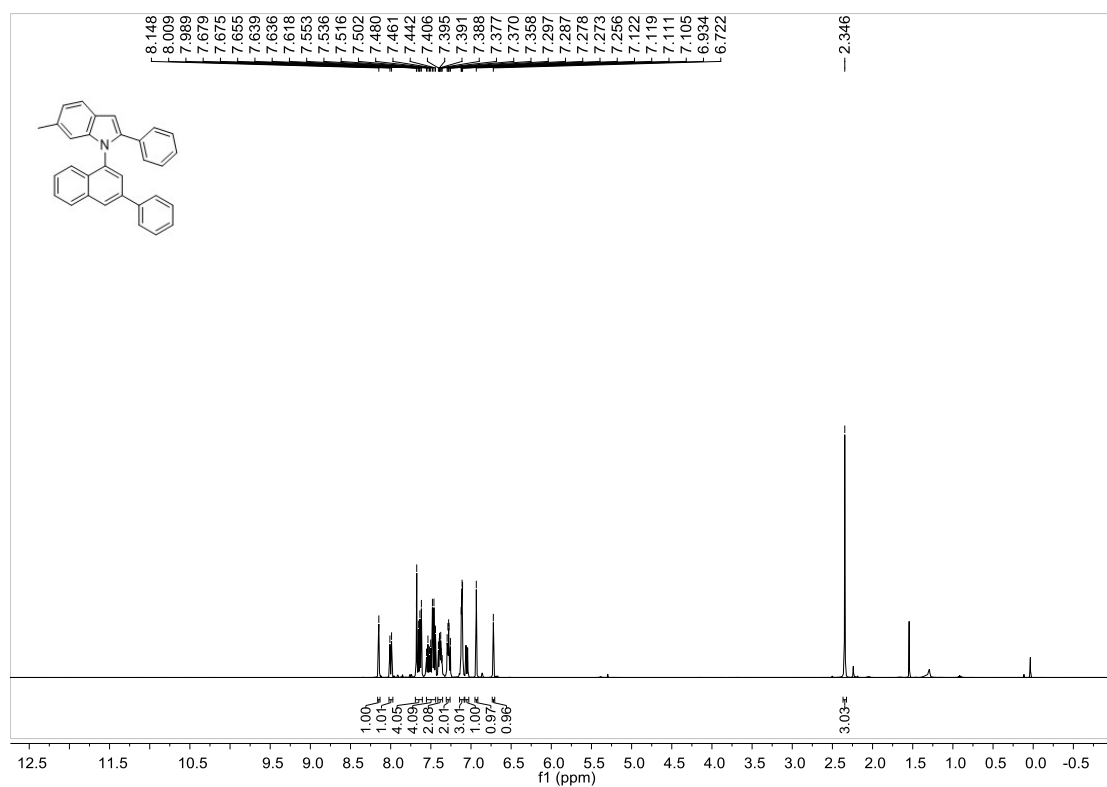

### <sup>13</sup>C NMR Spectrum of **52c**

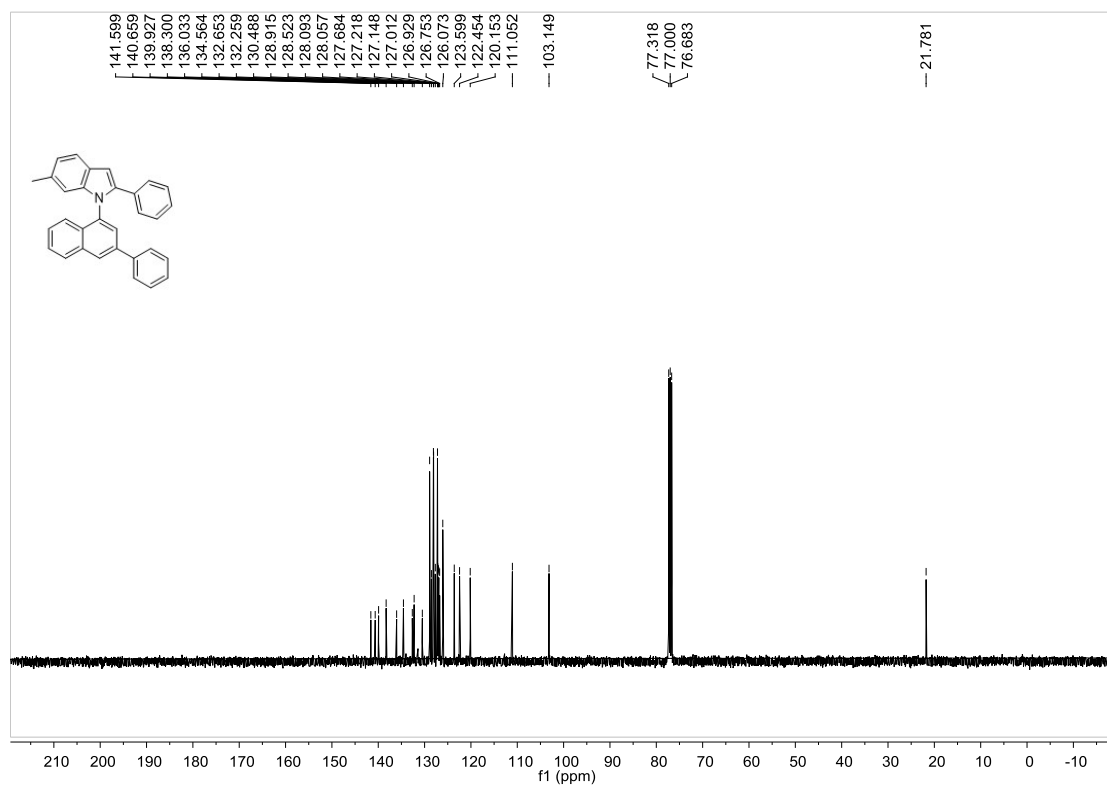

### <sup>1</sup>H NMR Spectrum of **53c**

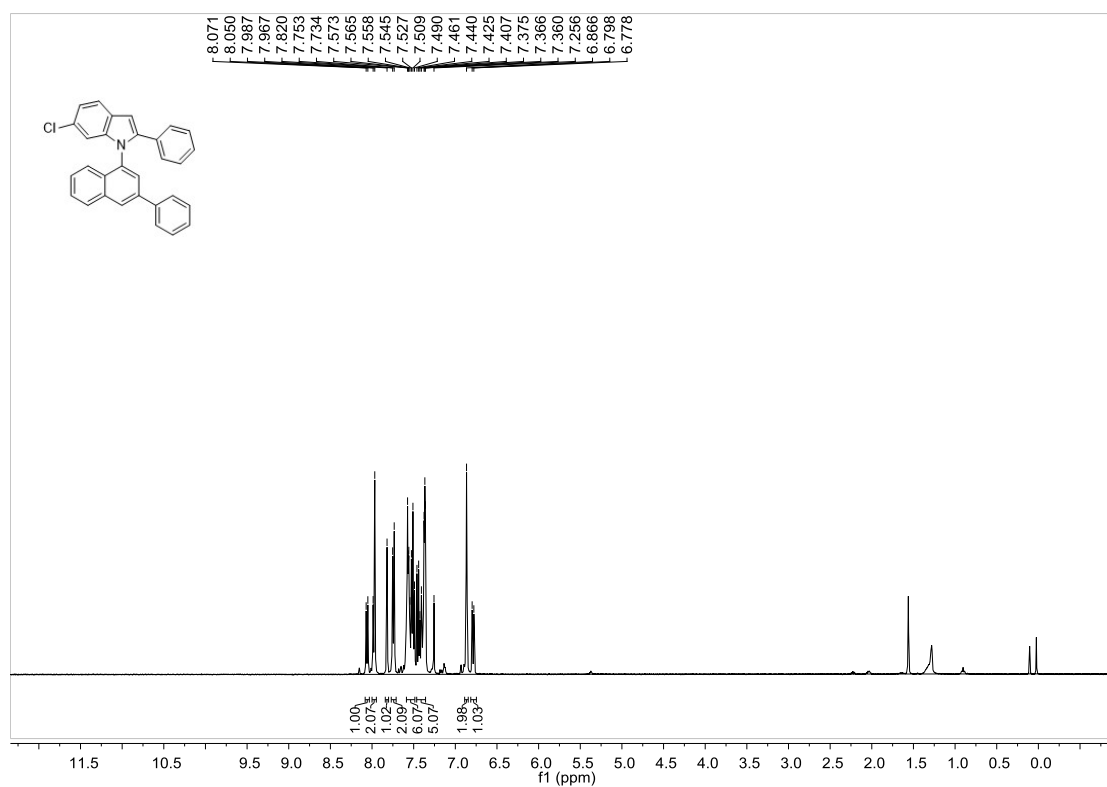

### <sup>13</sup>C NMR Spectrum of **53c**

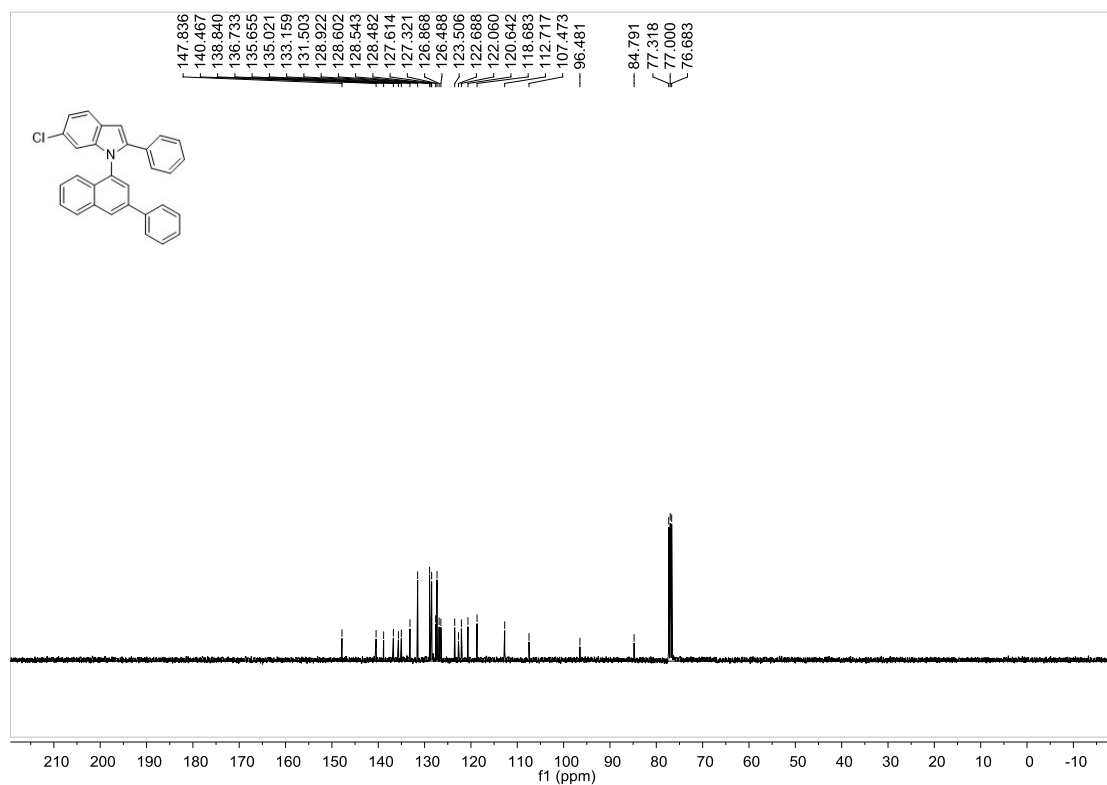

### <sup>1</sup>H NMR Spectrum of 54c

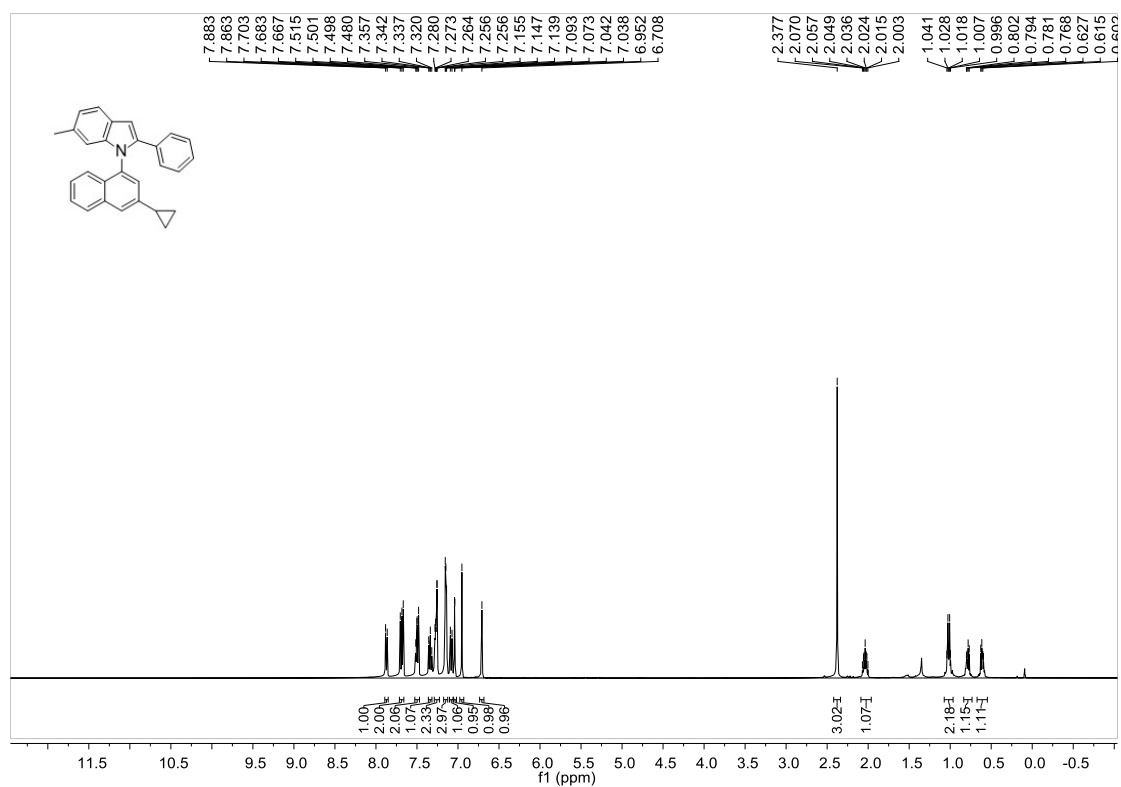

### <sup>13</sup>C NMR Spectrum of 54c

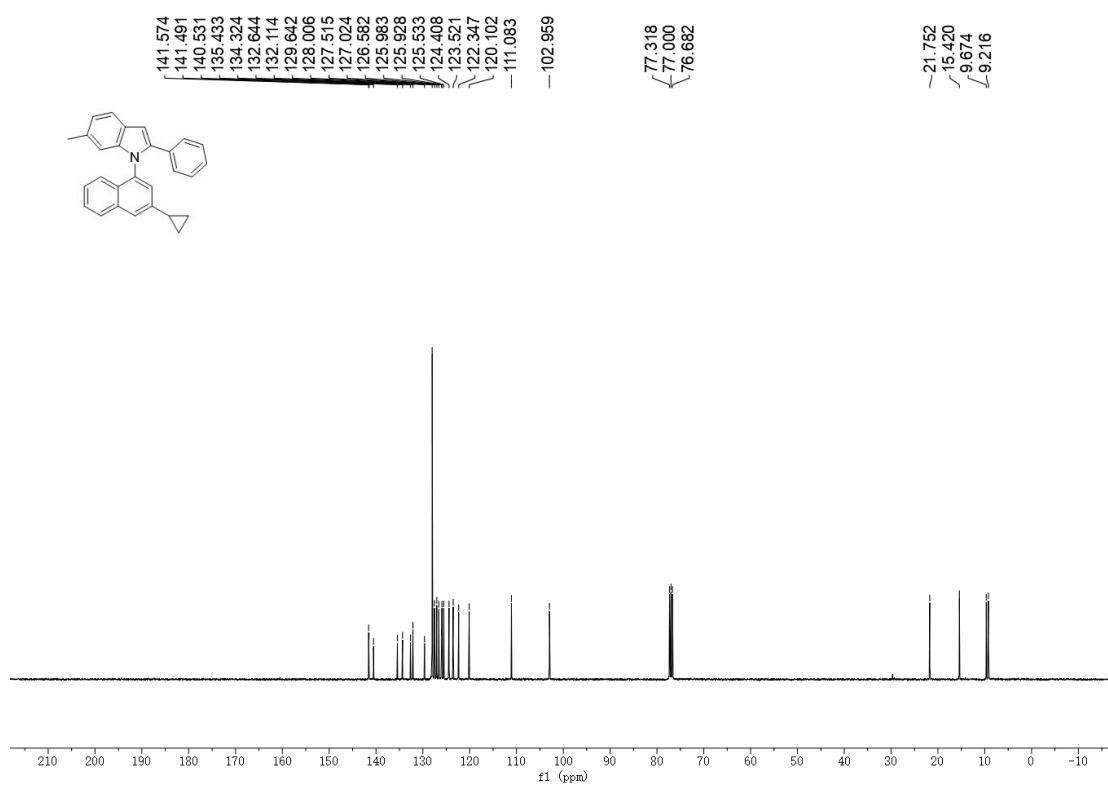

### <sup>1</sup>H NMR Spectrum of **55c**

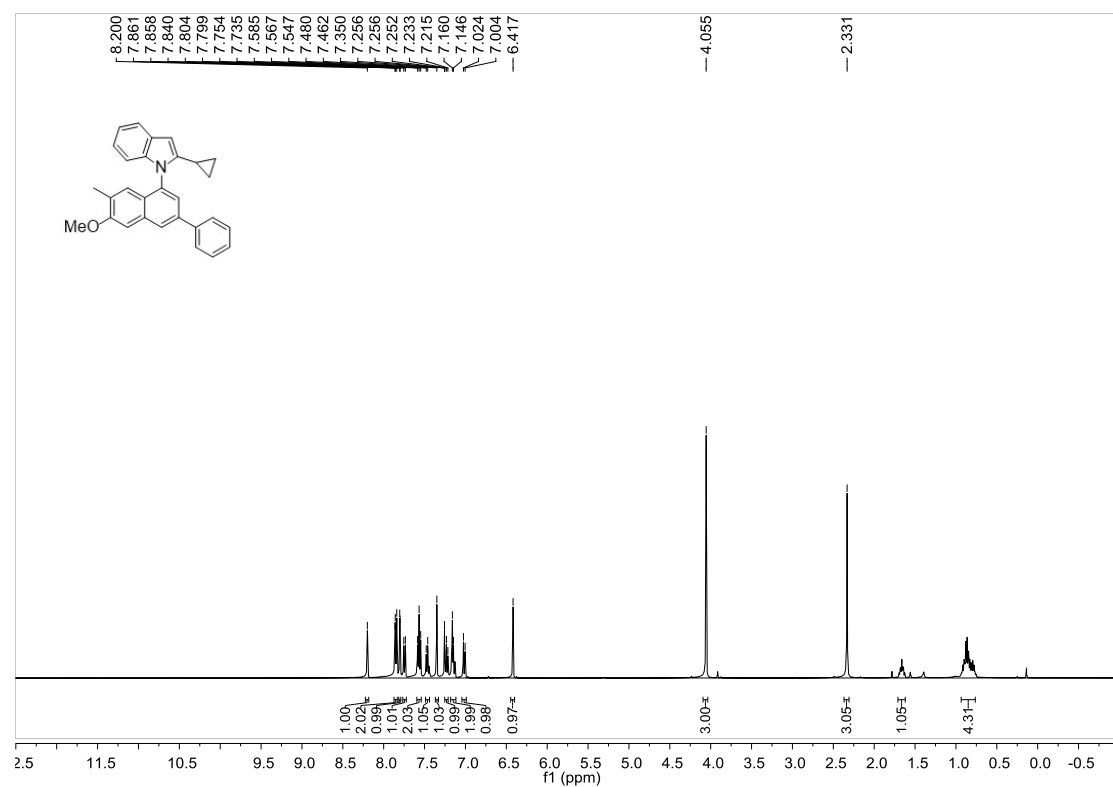

### <sup>13</sup>C NMR Spectrum of **55c**

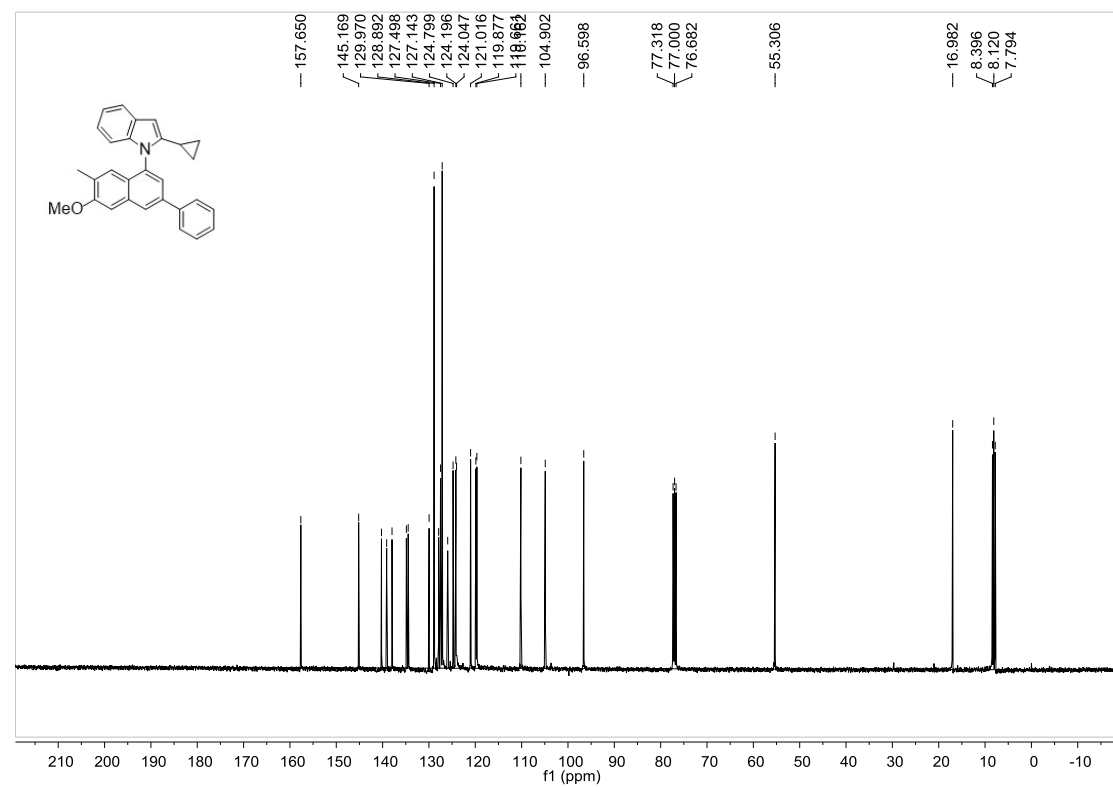

### <sup>1</sup>H NMR Spectrum of **56c**

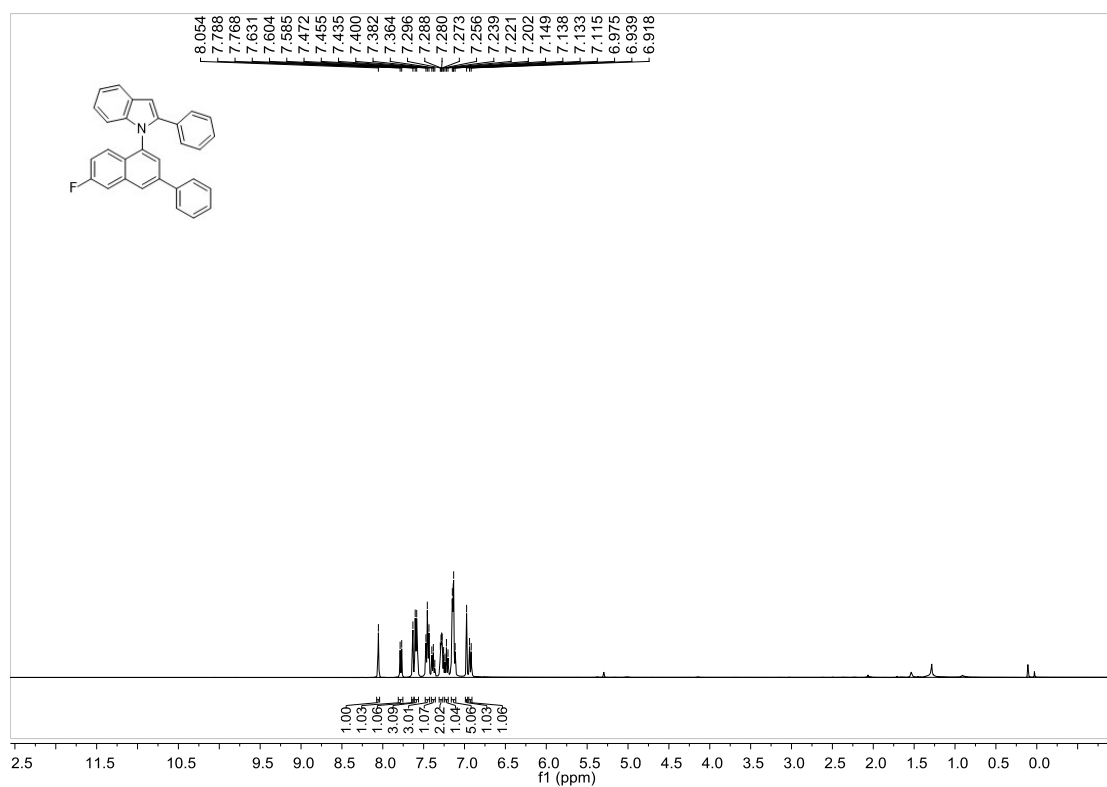

### <sup>13</sup>C NMR Spectrum of **56c**

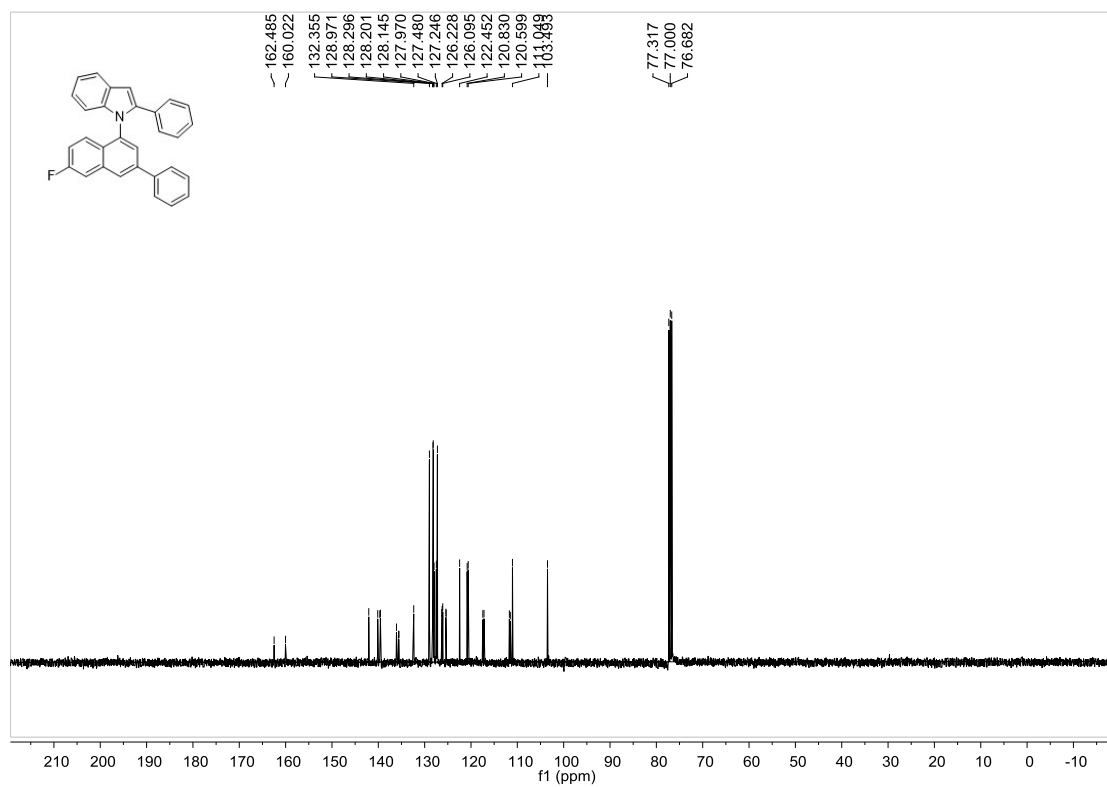

<sup>19</sup>F NMR Spectrum of **56c**

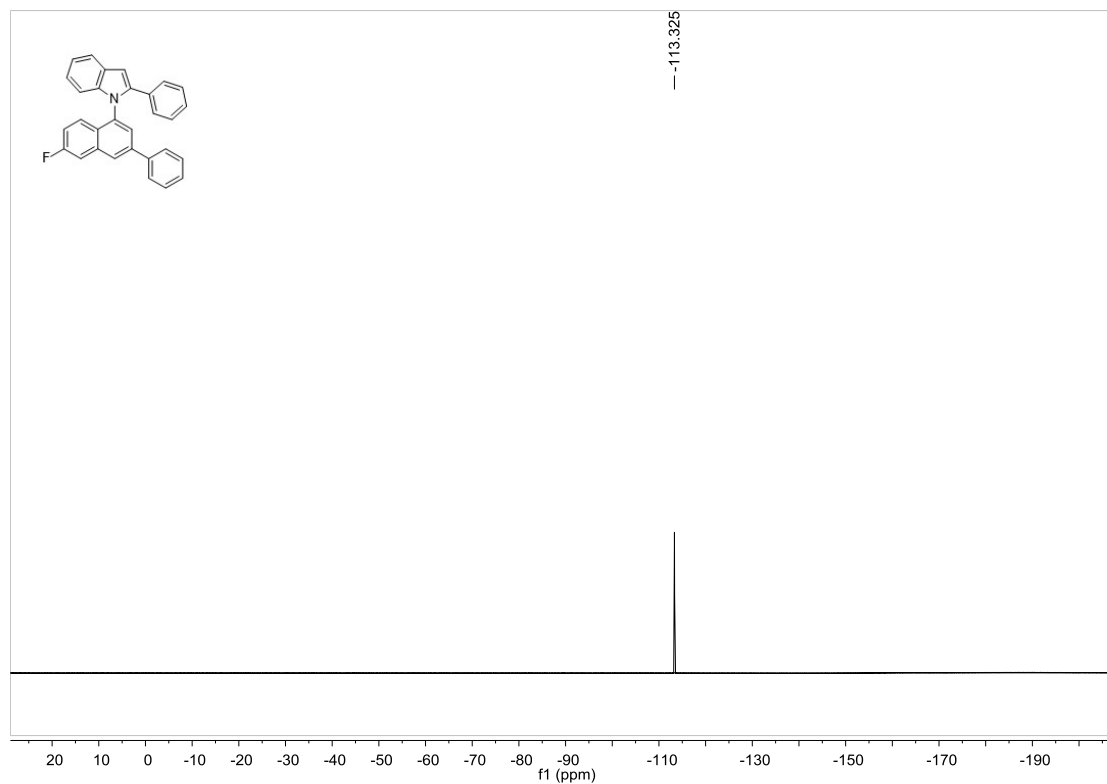

<sup>1</sup>H NMR Spectrum of **57c**

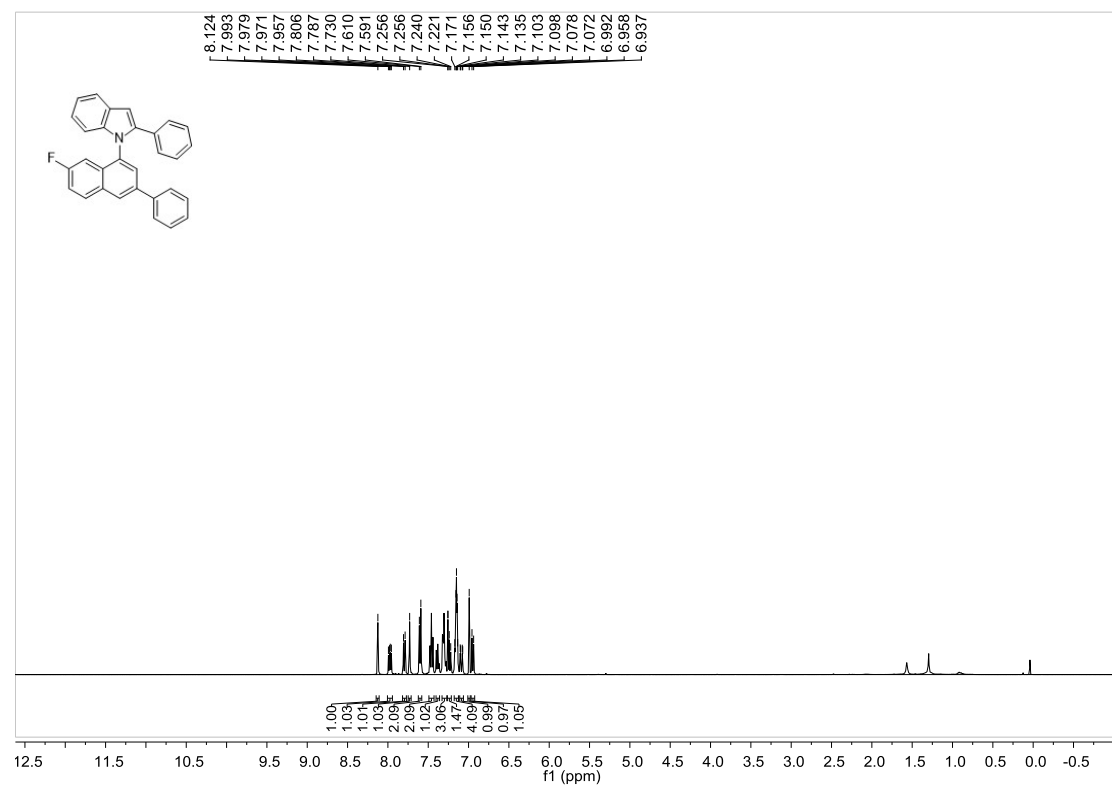

<sup>13</sup>C NMR Spectrum of **57c**

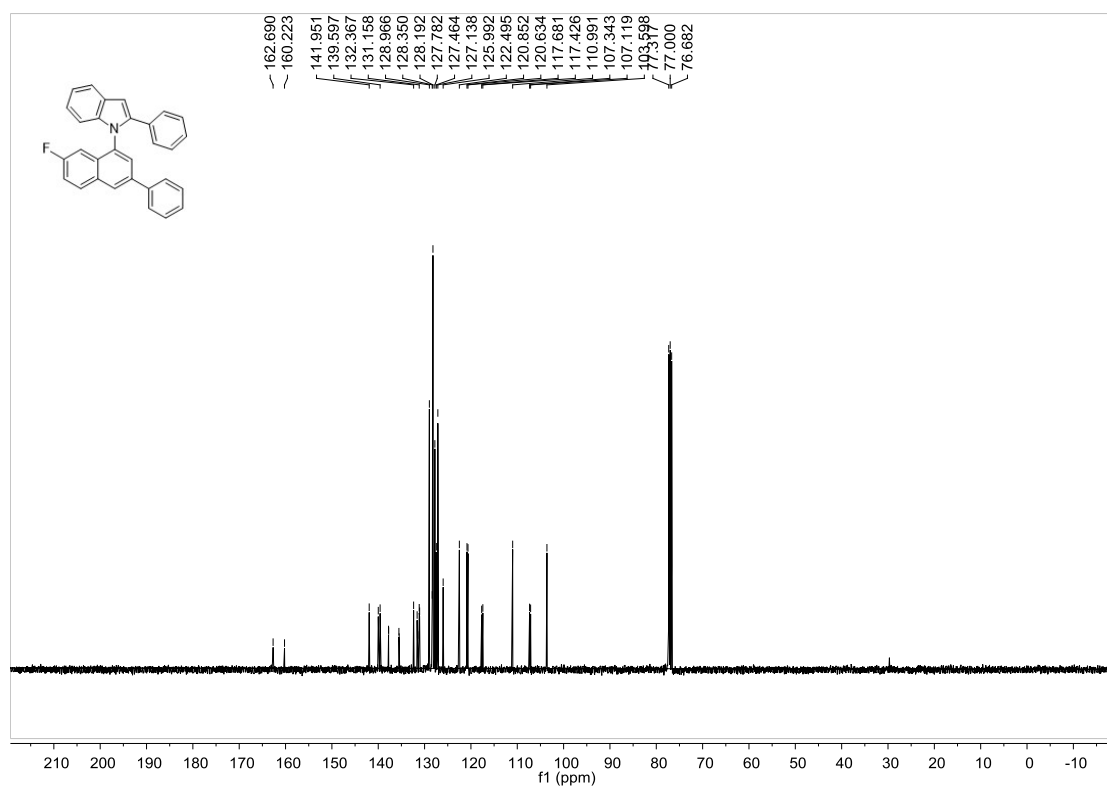

<sup>19</sup>F NMR Spectrum of **57c**

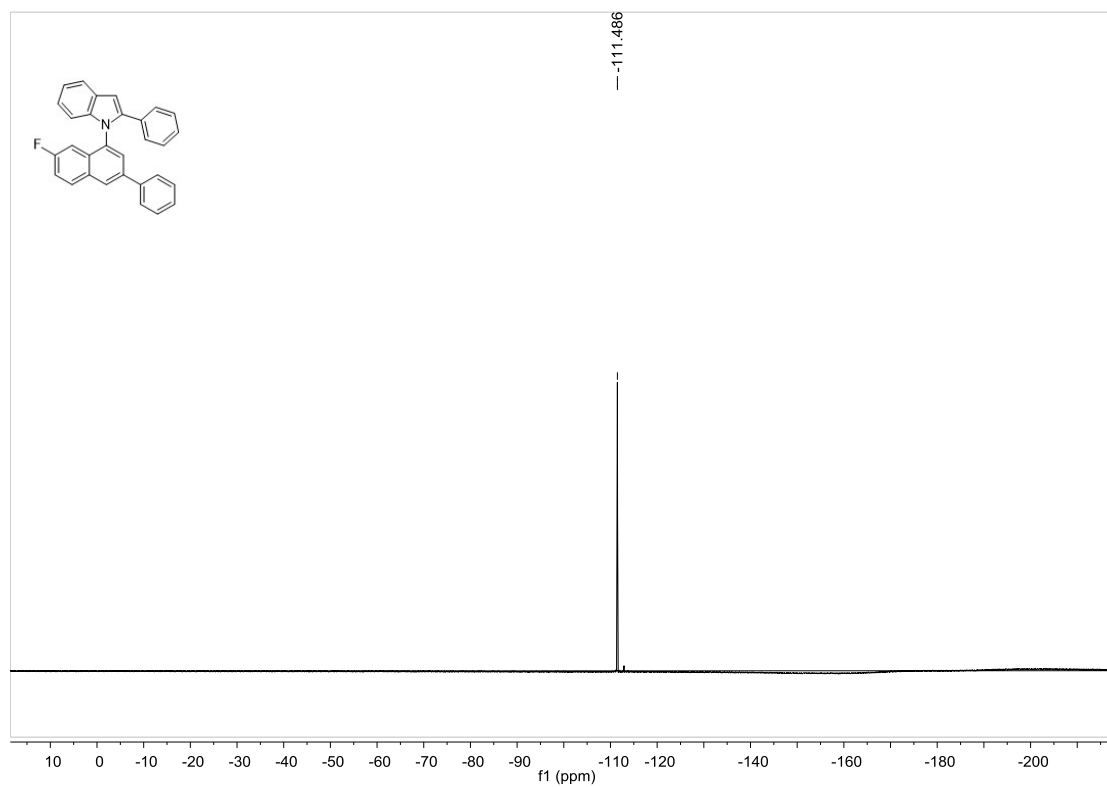

### <sup>1</sup>H NMR Spectrum of **58c**

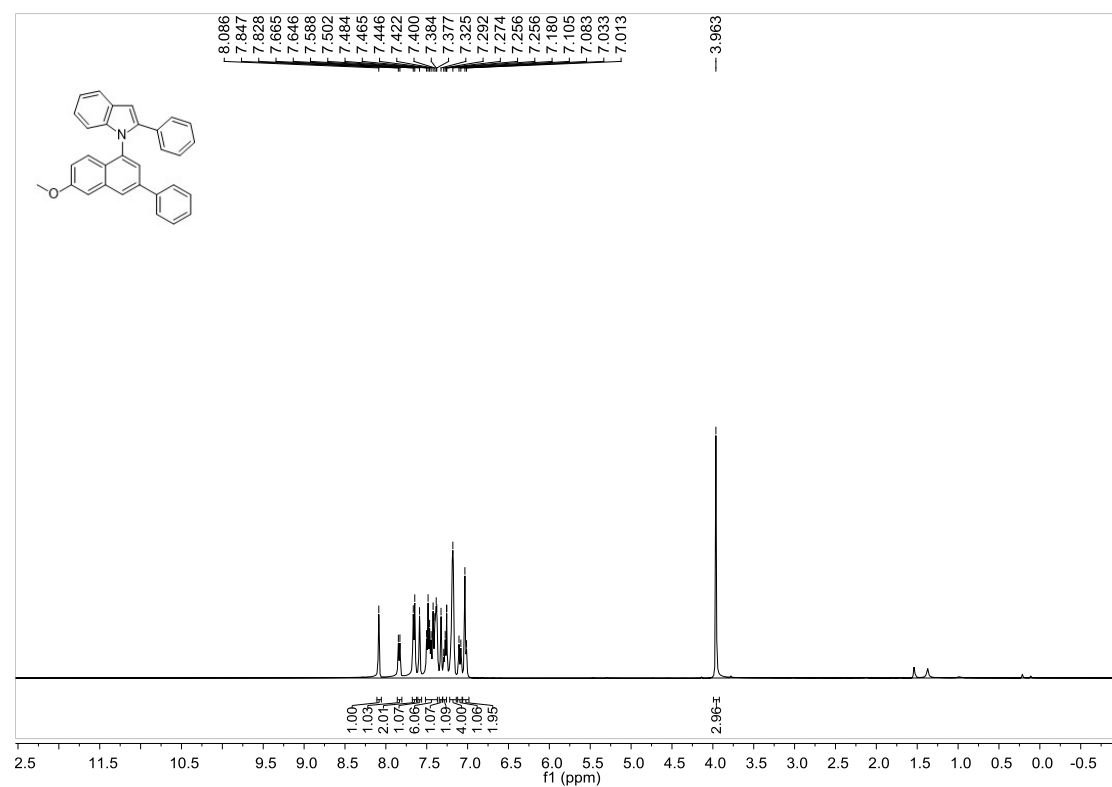

### <sup>13</sup>C NMR Spectrum of **58c**

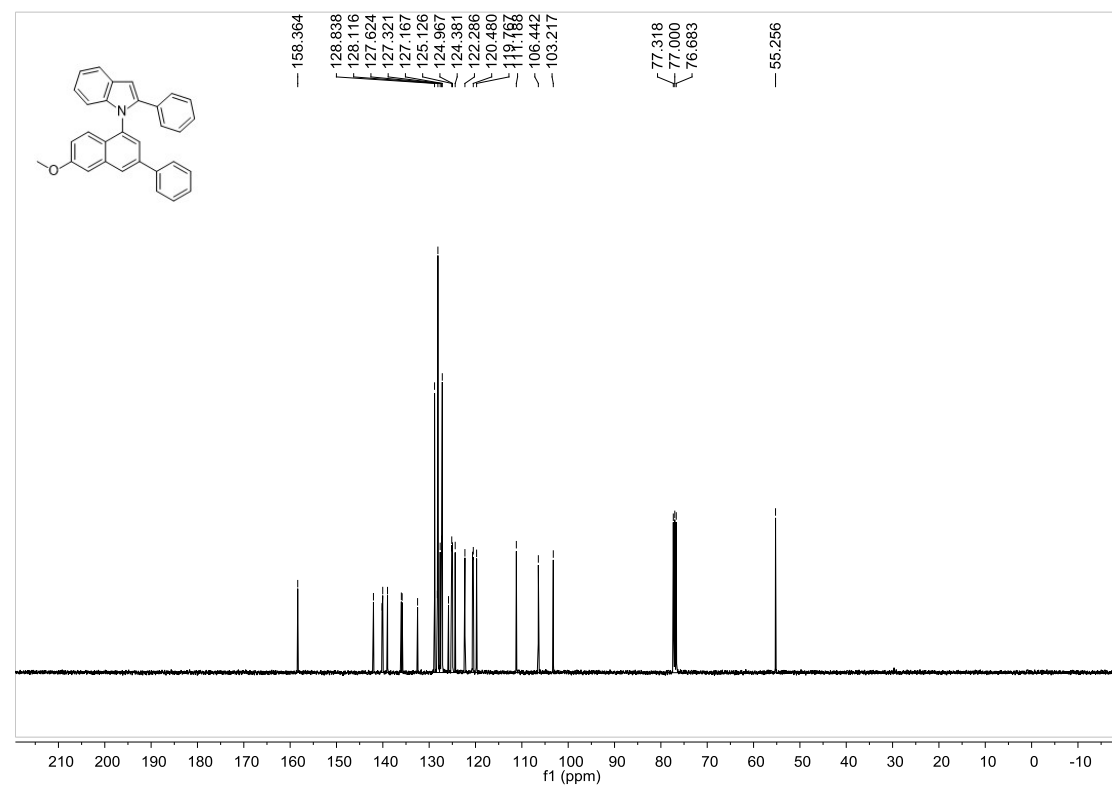



### <sup>1</sup>H NMR Spectrum of **59c**

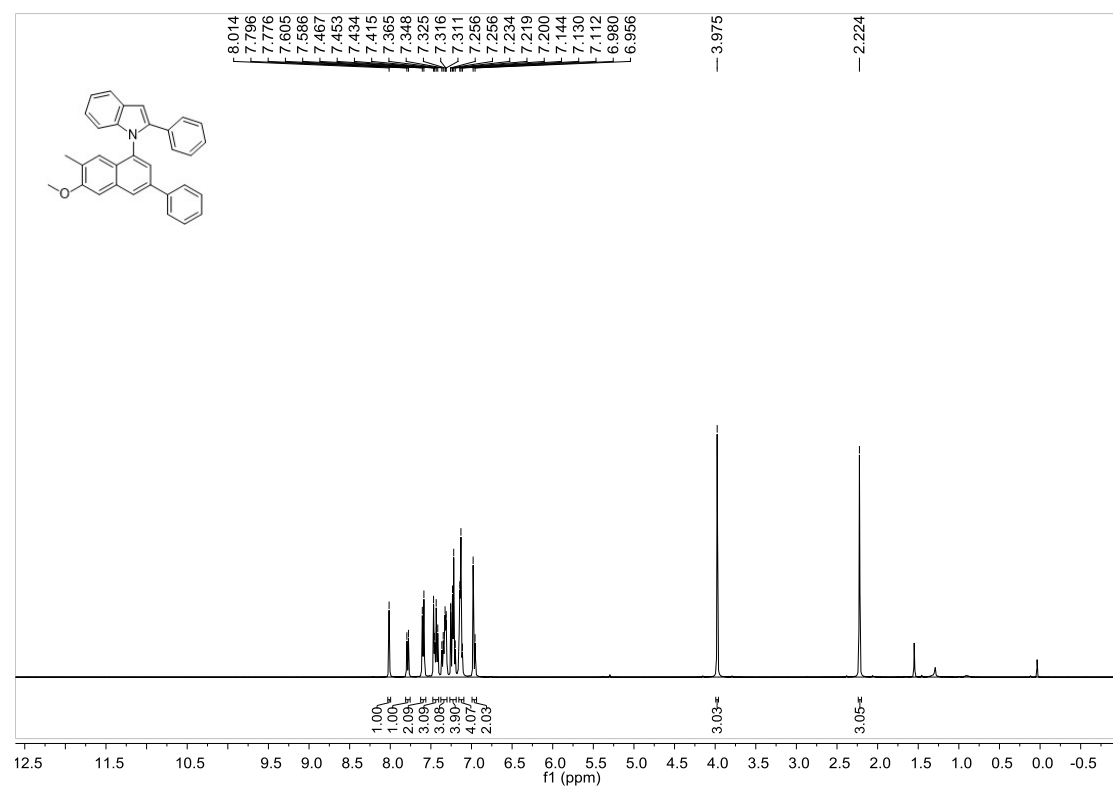

### <sup>13</sup>C NMR Spectrum of **59c**

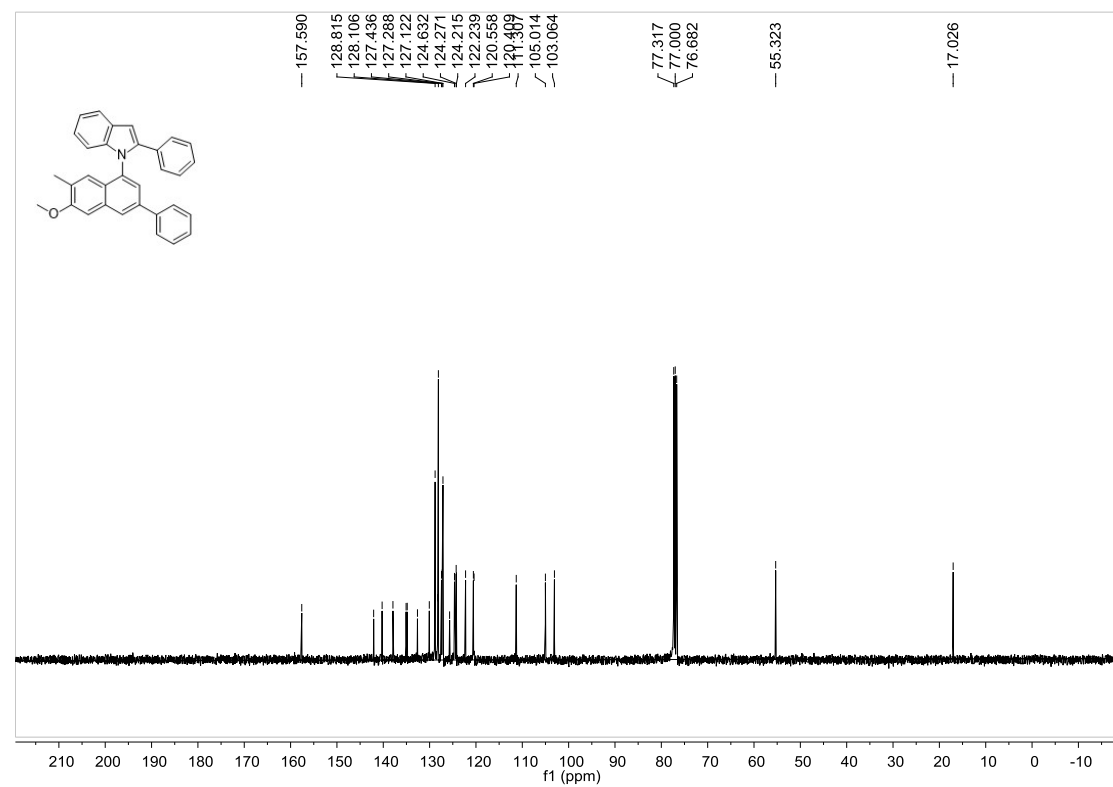

### <sup>1</sup>H NMR Spectrum of **60c**

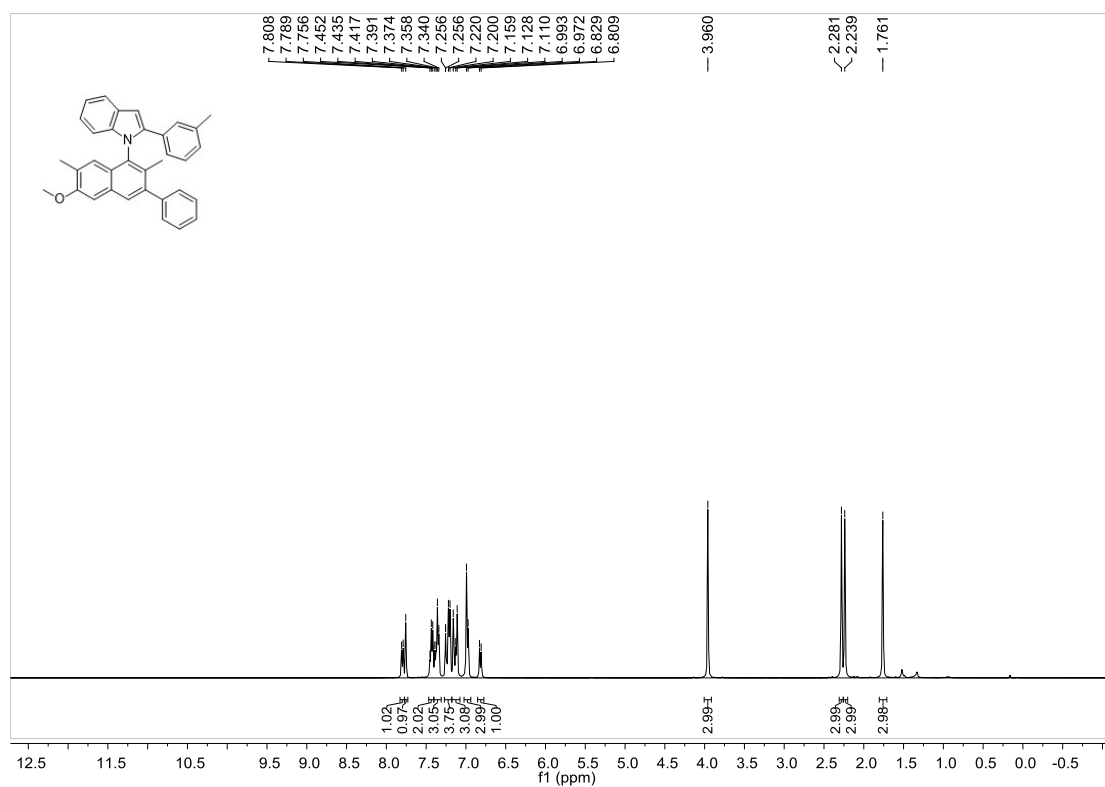

### <sup>13</sup>C NMR Spectrum of **60c**

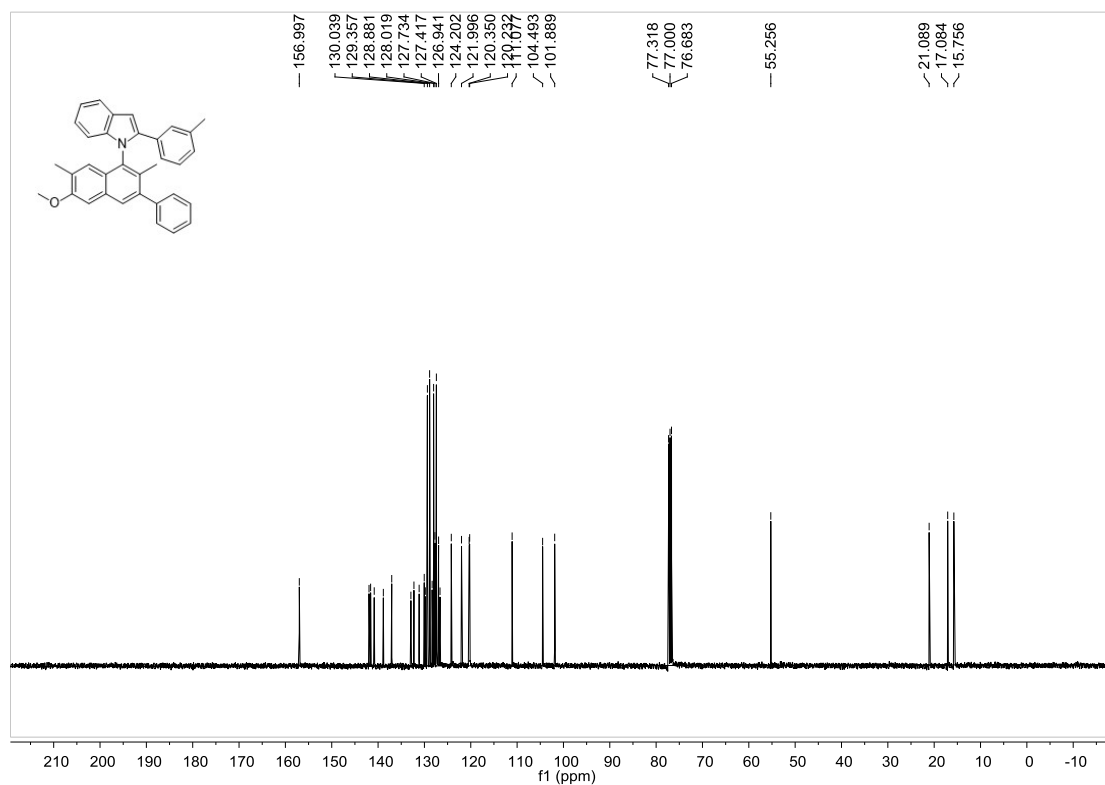

### <sup>1</sup>H NMR Spectrum of **61c**

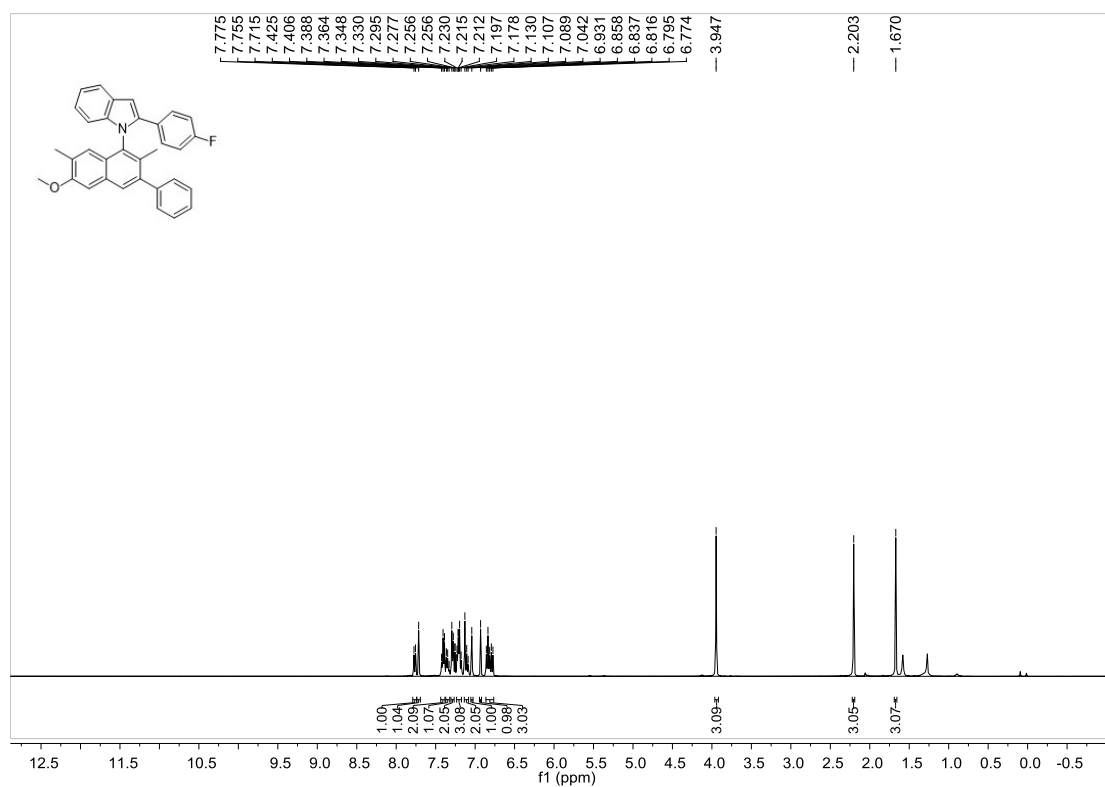

### <sup>13</sup>C NMR Spectrum of **61c**

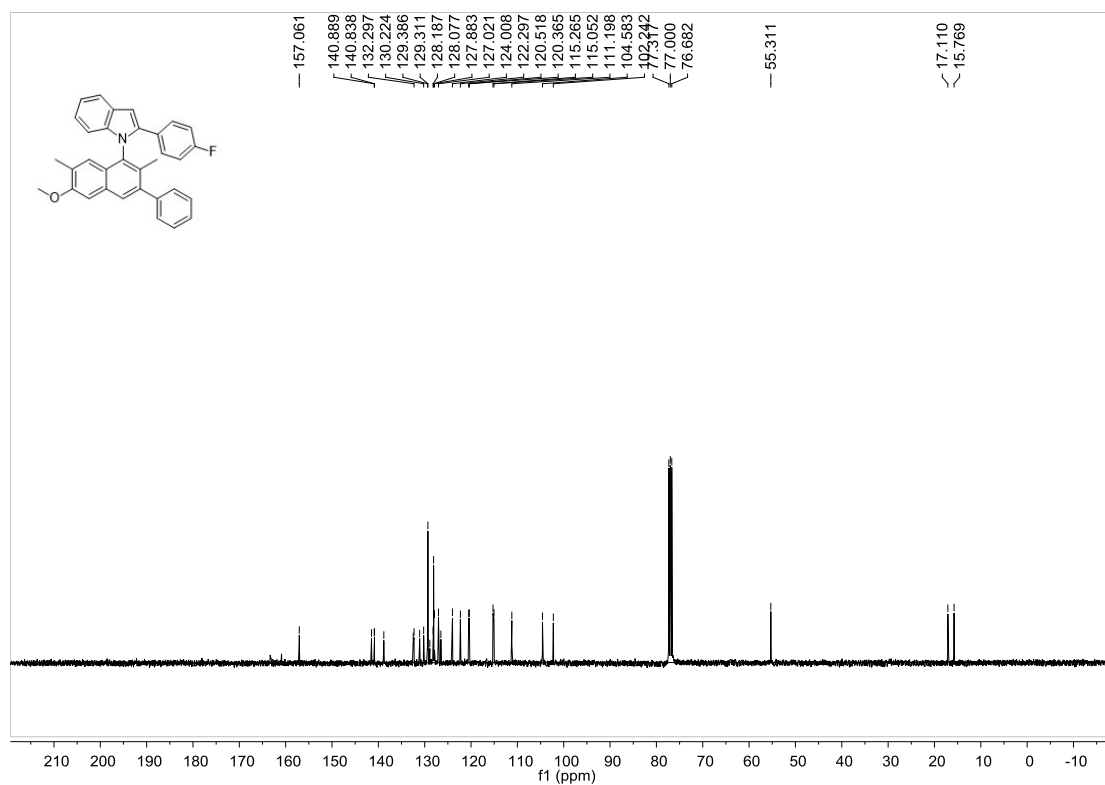

<sup>19</sup>F NMR Spectrum of **61c**

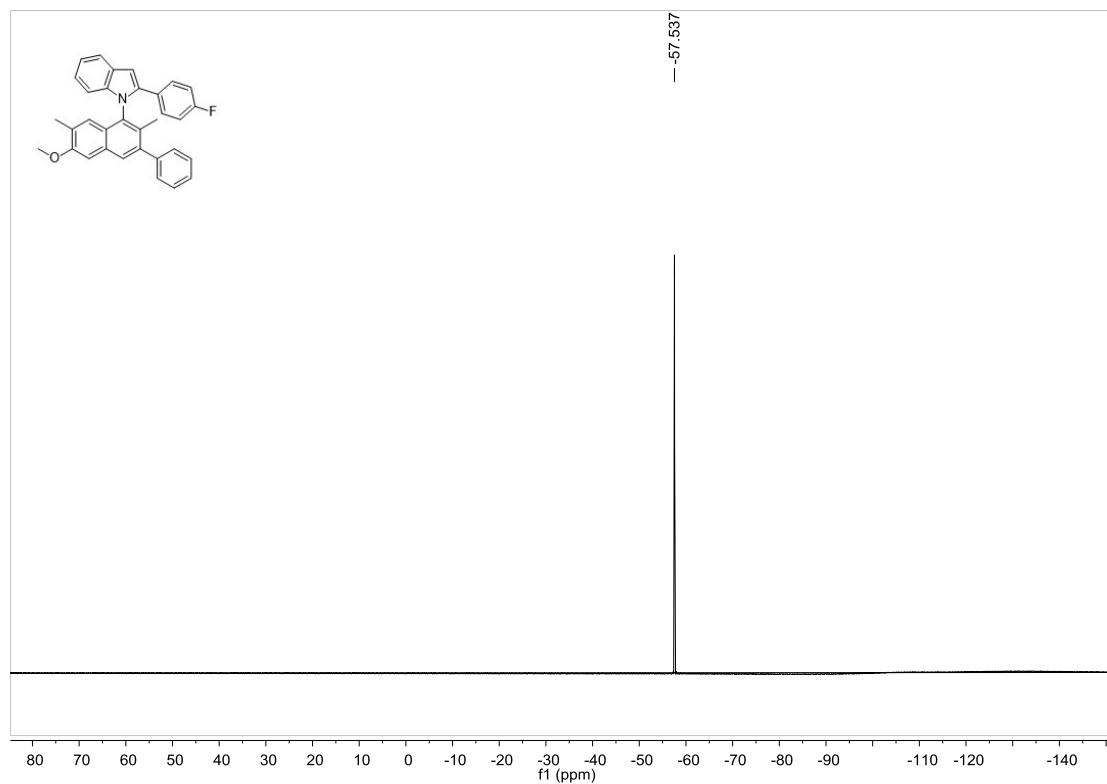

<sup>1</sup>H NMR Spectrum of **62c**

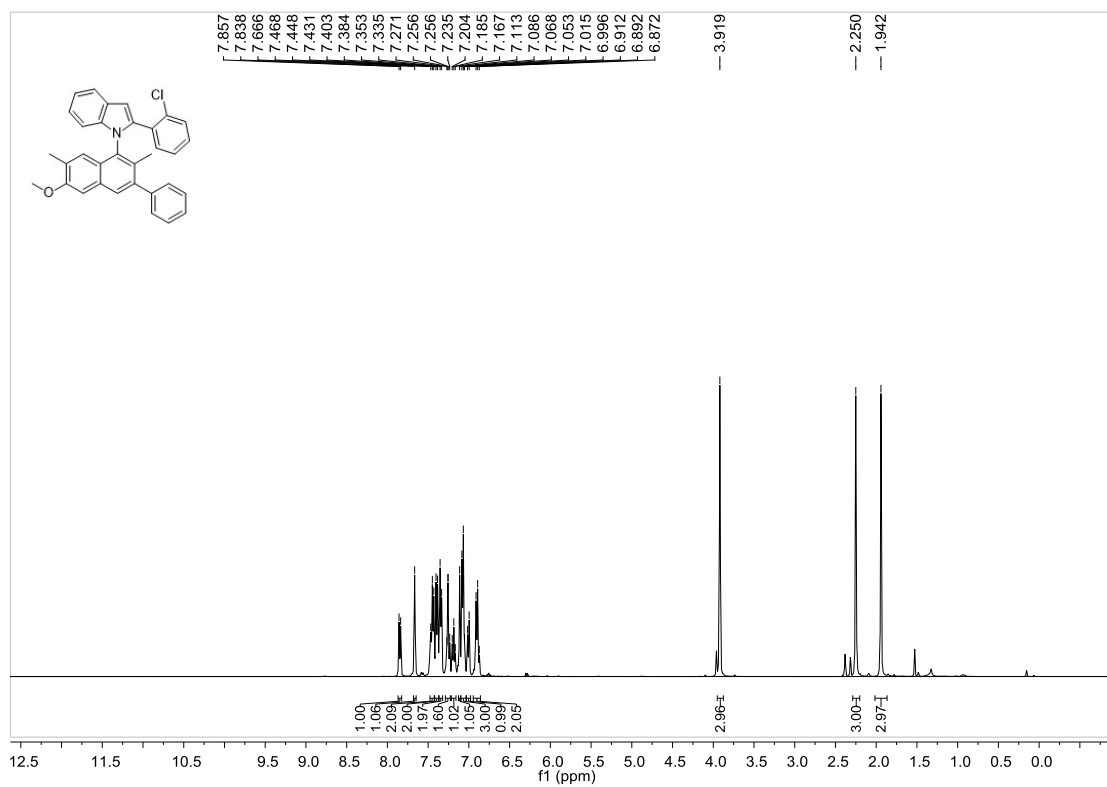

### <sup>13</sup>C NMR Spectrum of **62c**

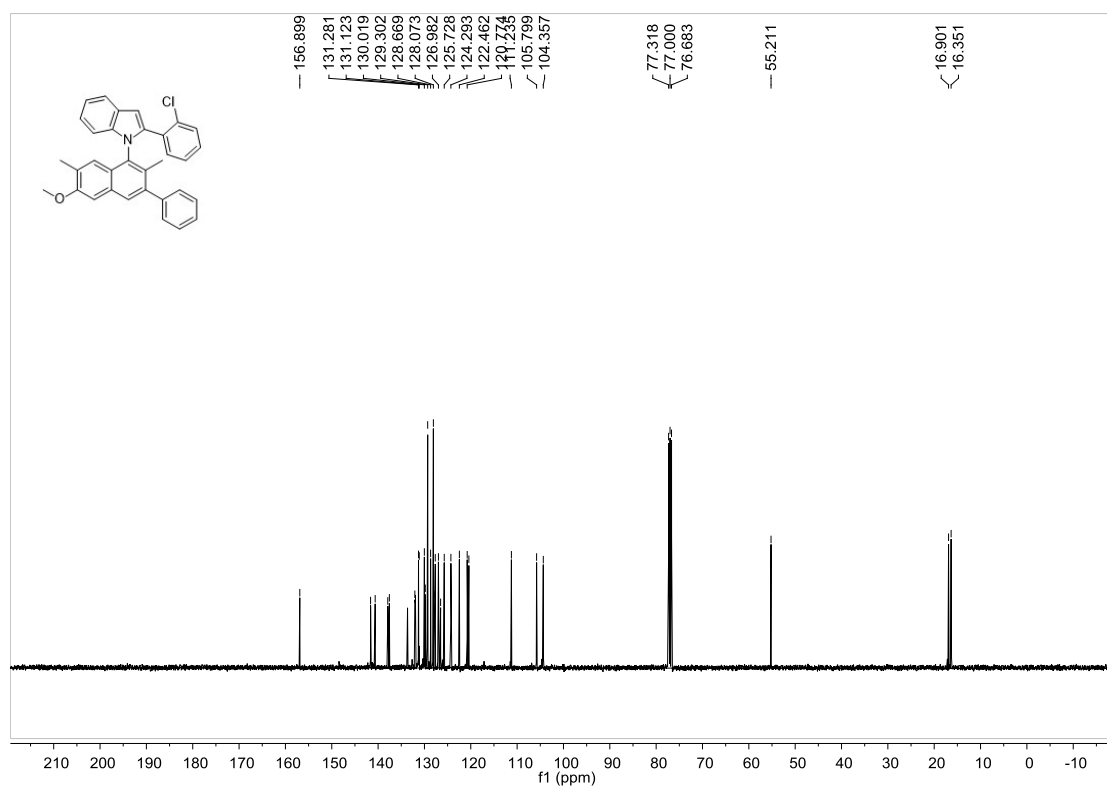

### <sup>1</sup>H NMR Spectrum of **63c**

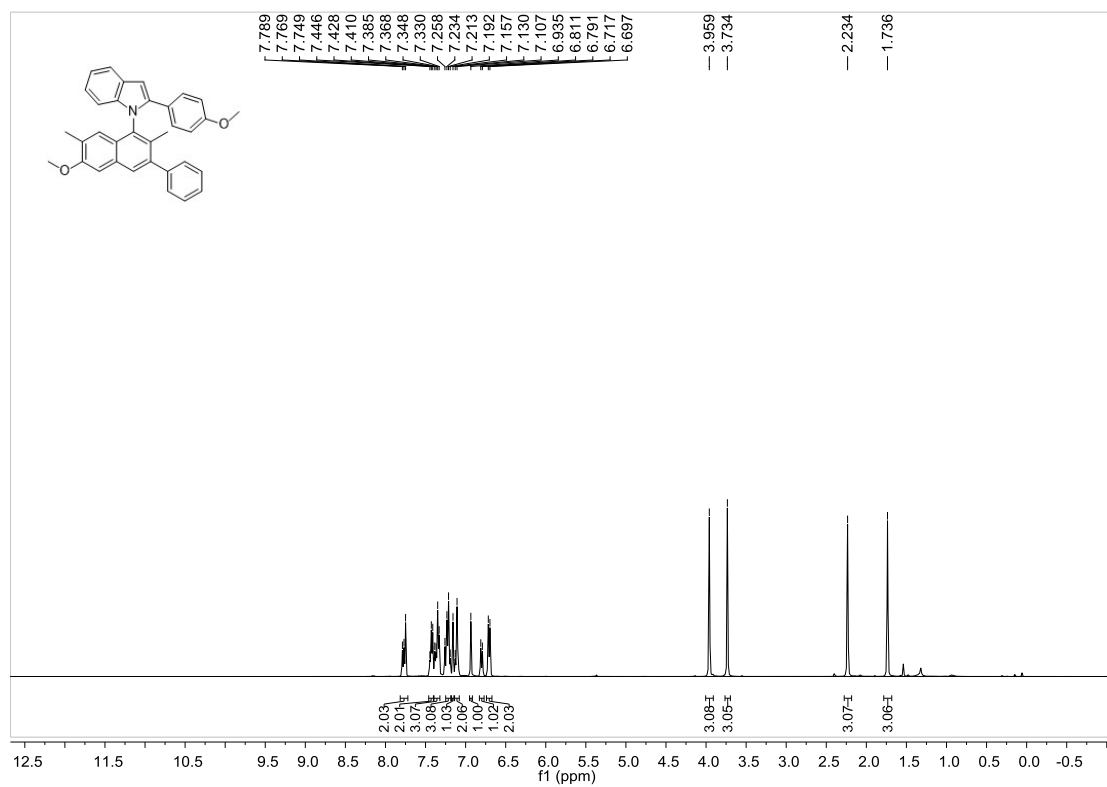

### <sup>13</sup>C NMR Spectrum of **63c**

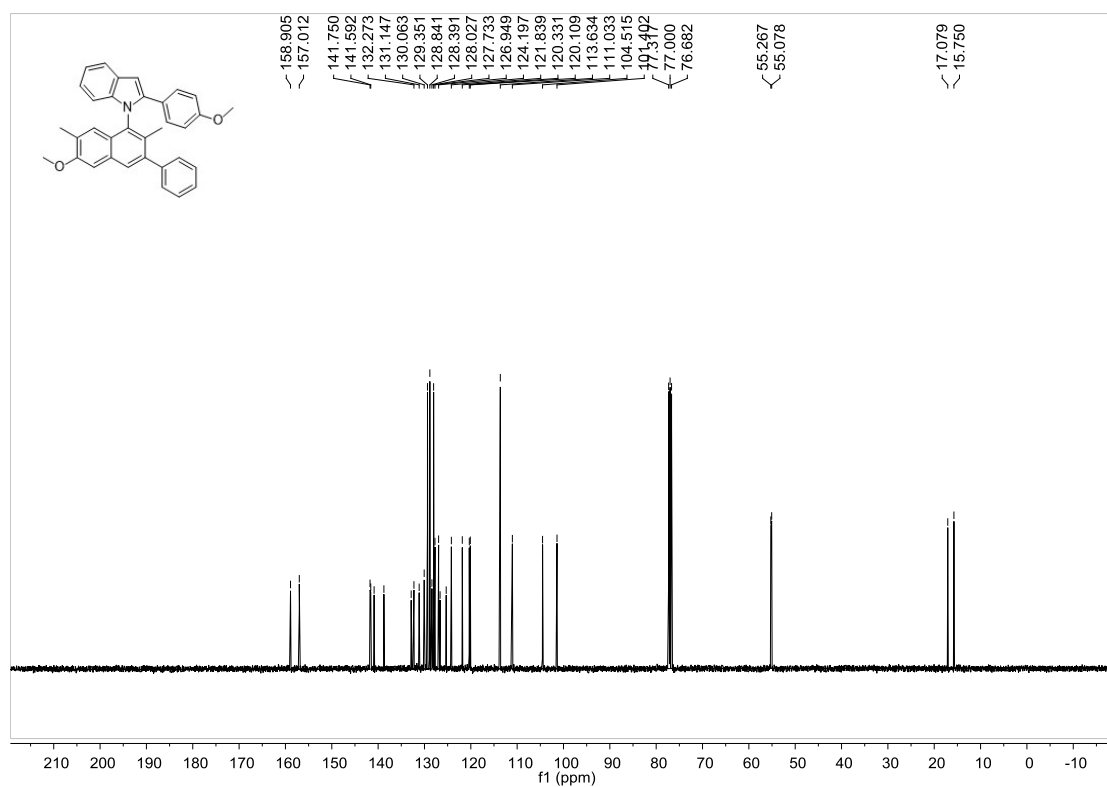

### <sup>1</sup>H NMR Spectrum of **64c**

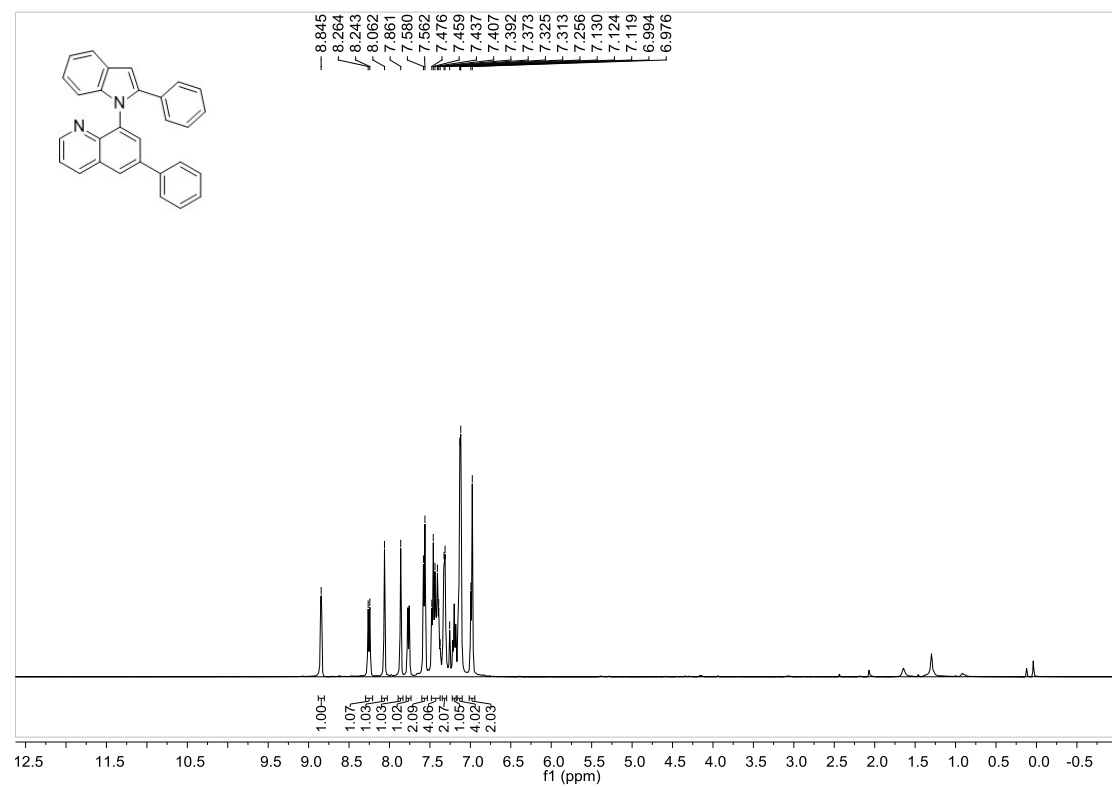

### <sup>13</sup>C NMR Spectrum of **64c**

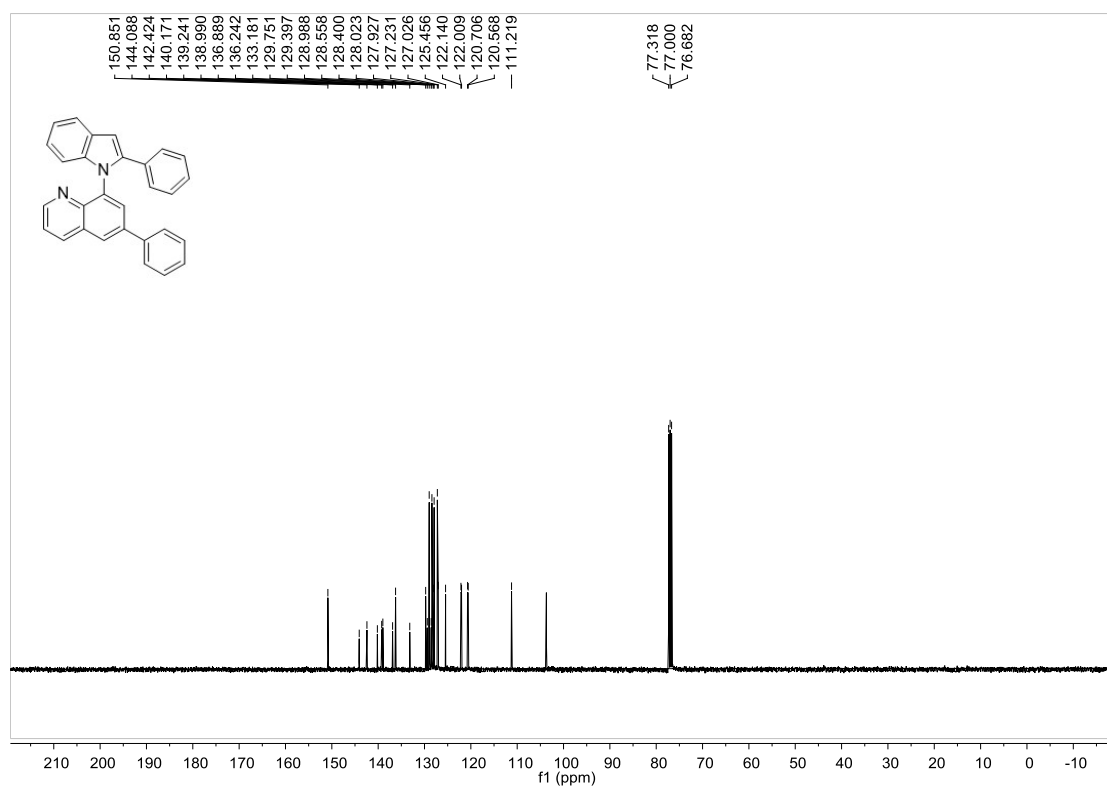

### <sup>1</sup>H NMR Spectrum of **65c**

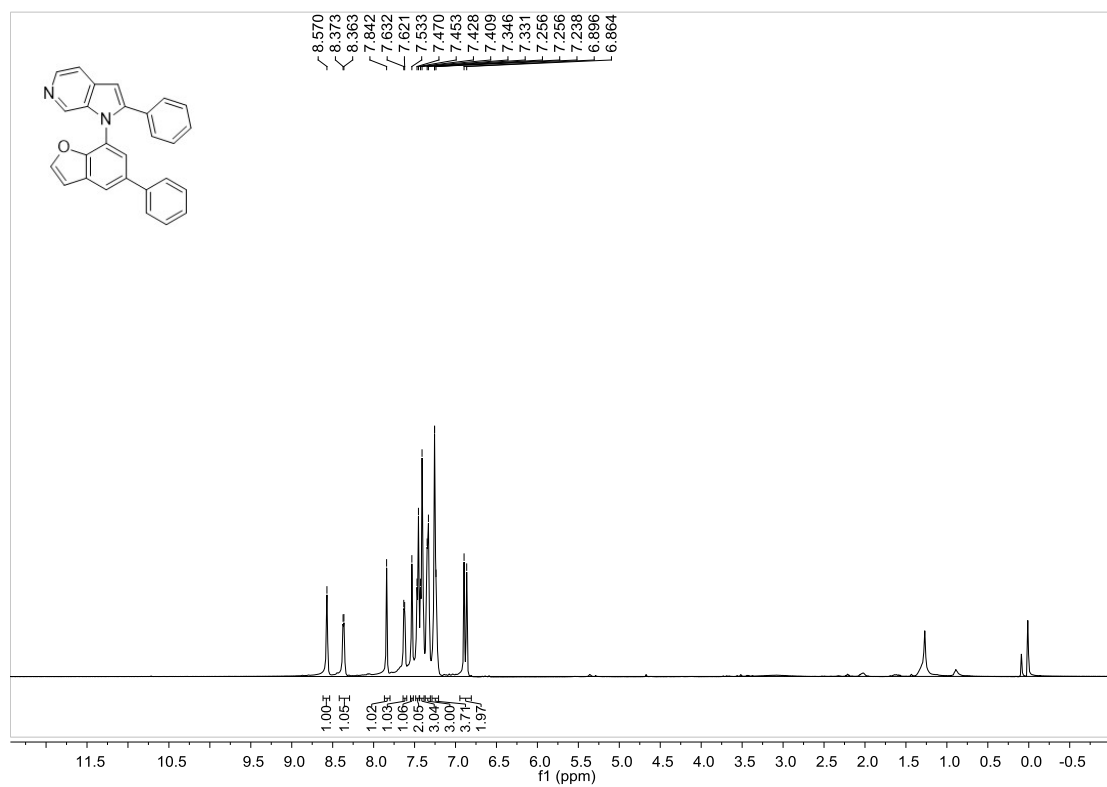

<sup>13</sup>C NMR Spectrum of **65c**

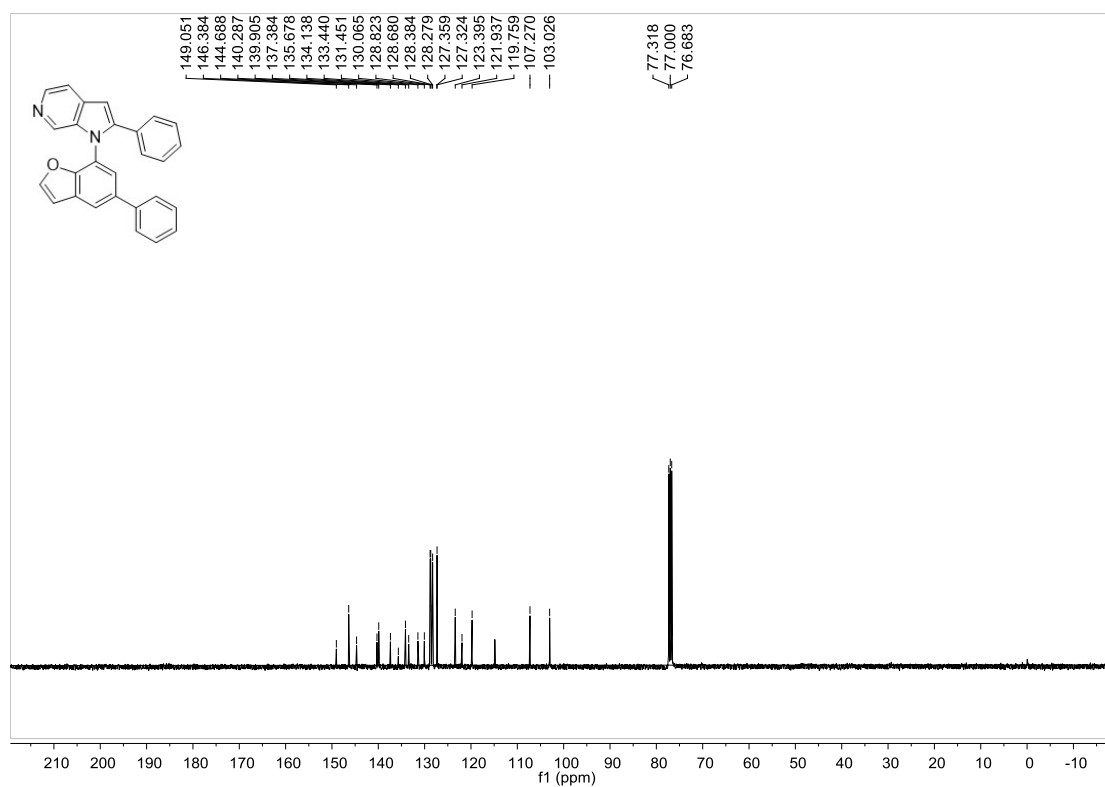

<sup>1</sup>H NMR Spectrum of **66c**

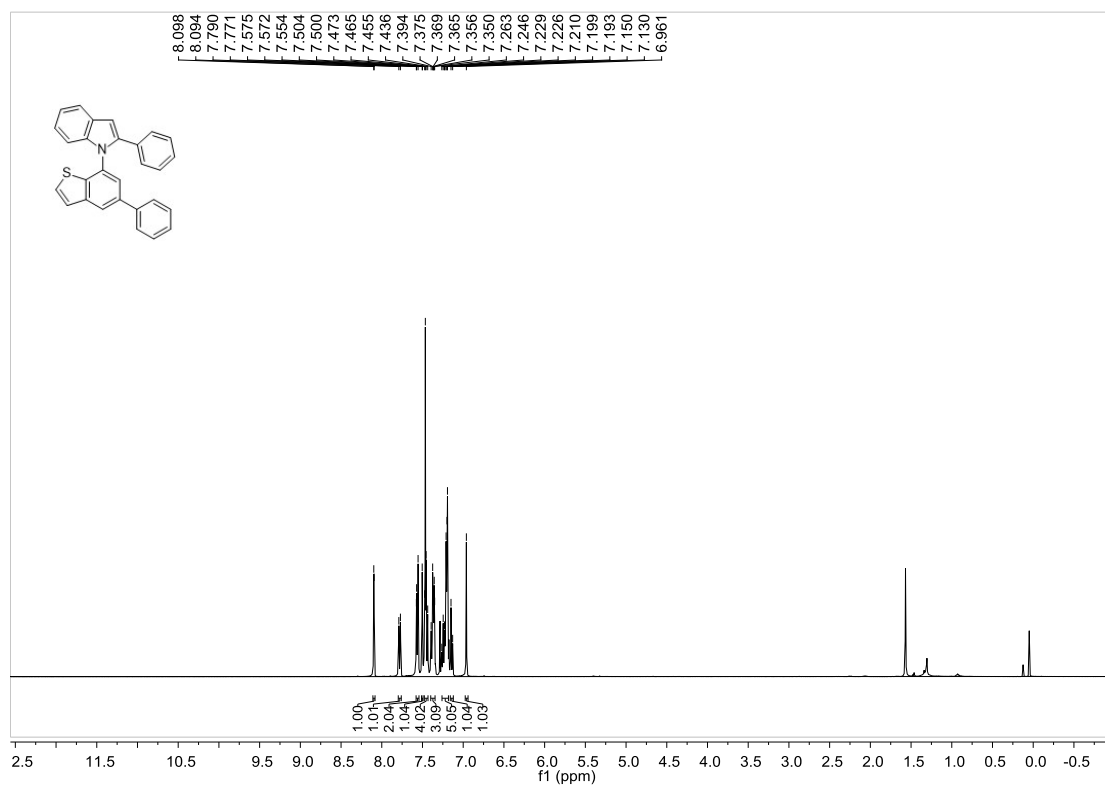



### <sup>13</sup>C NMR Spectrum of **66c**

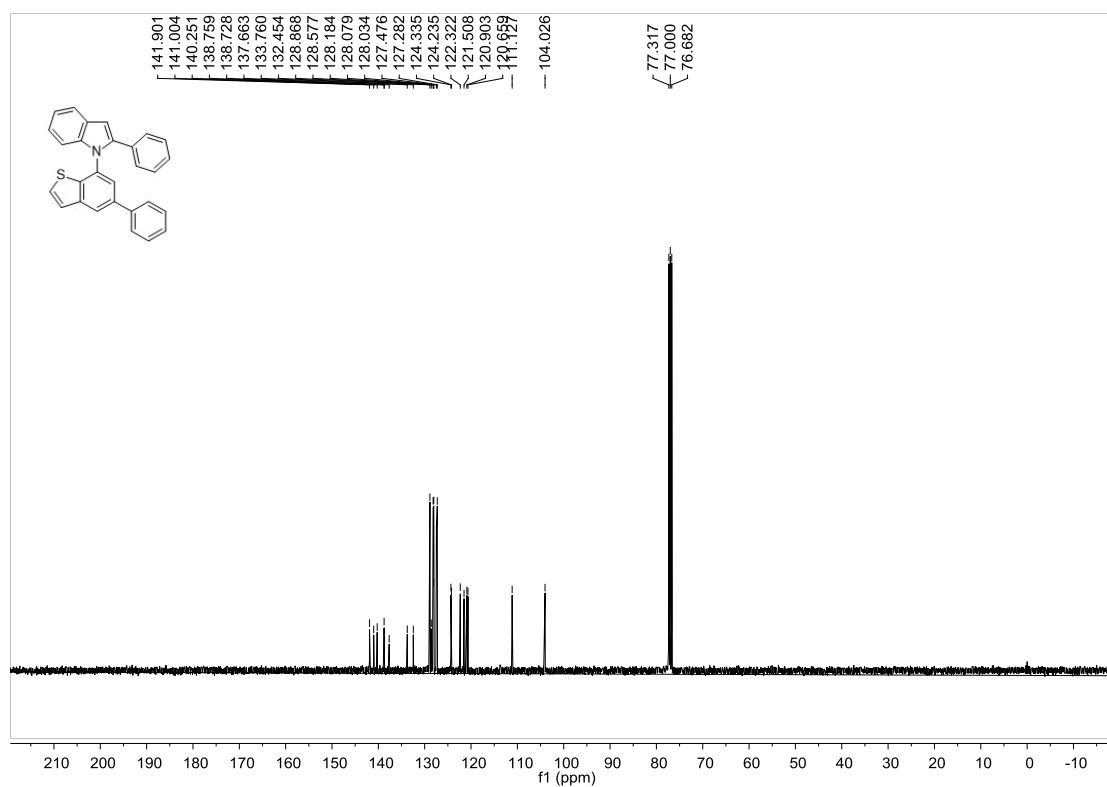

### <sup>1</sup>H NMR Spectrum of **67c**

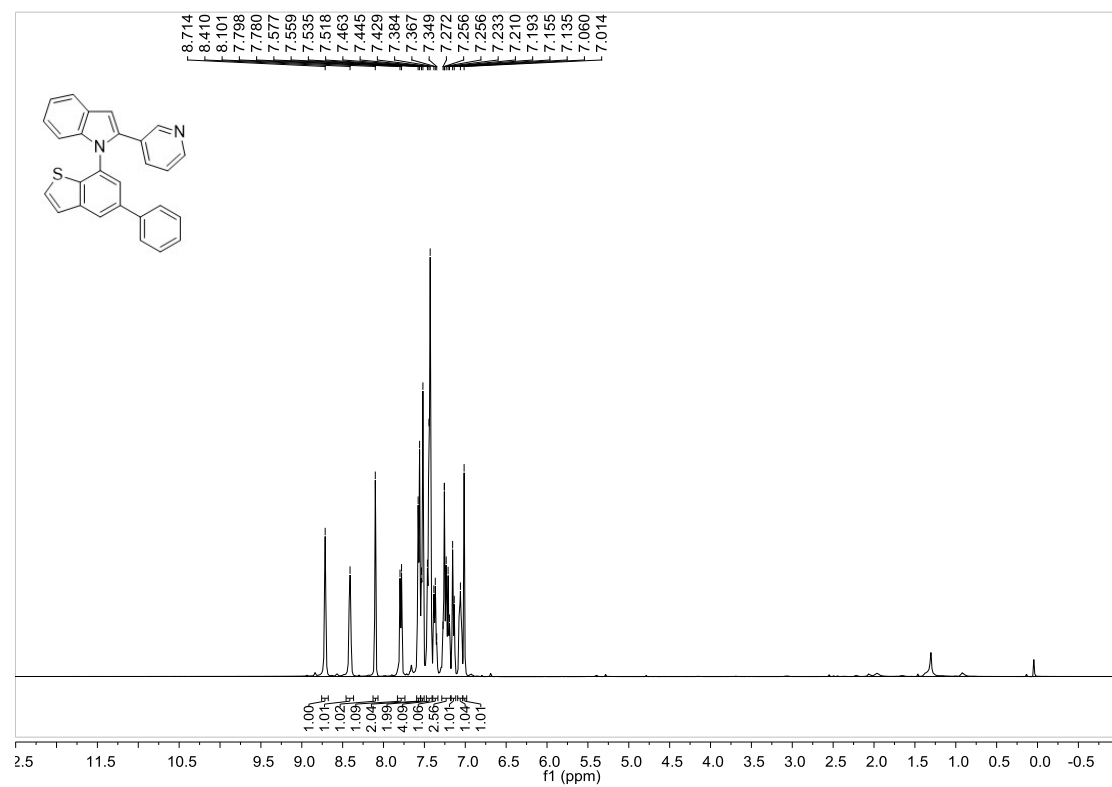

### <sup>13</sup>C NMR Spectrum of **67c**

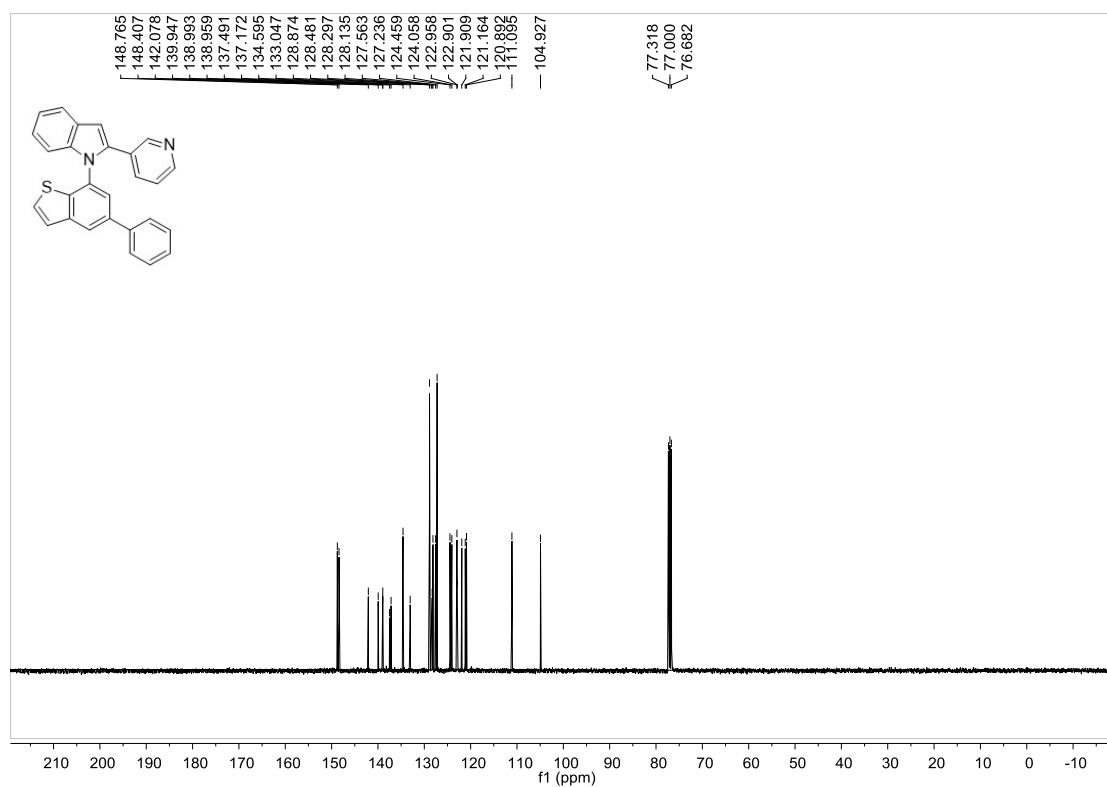

### <sup>1</sup>H NMR Spectrum of **68c**

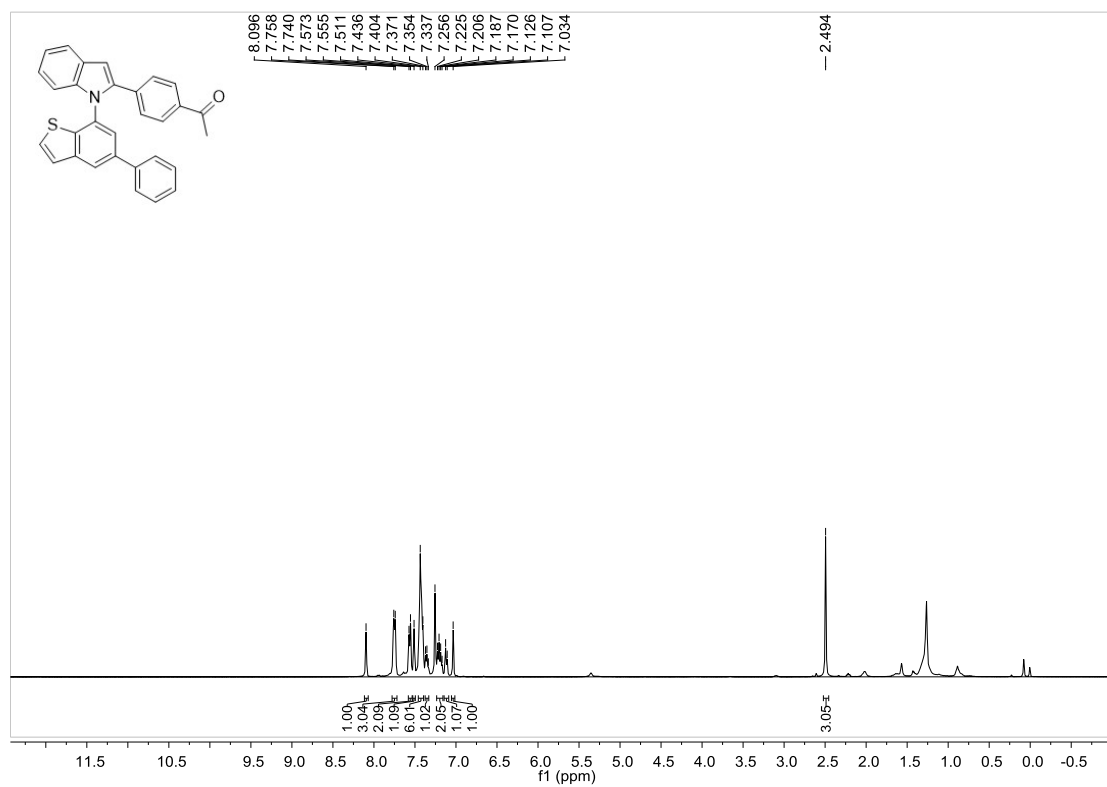

### <sup>13</sup>C NMR Spectrum of **68c**

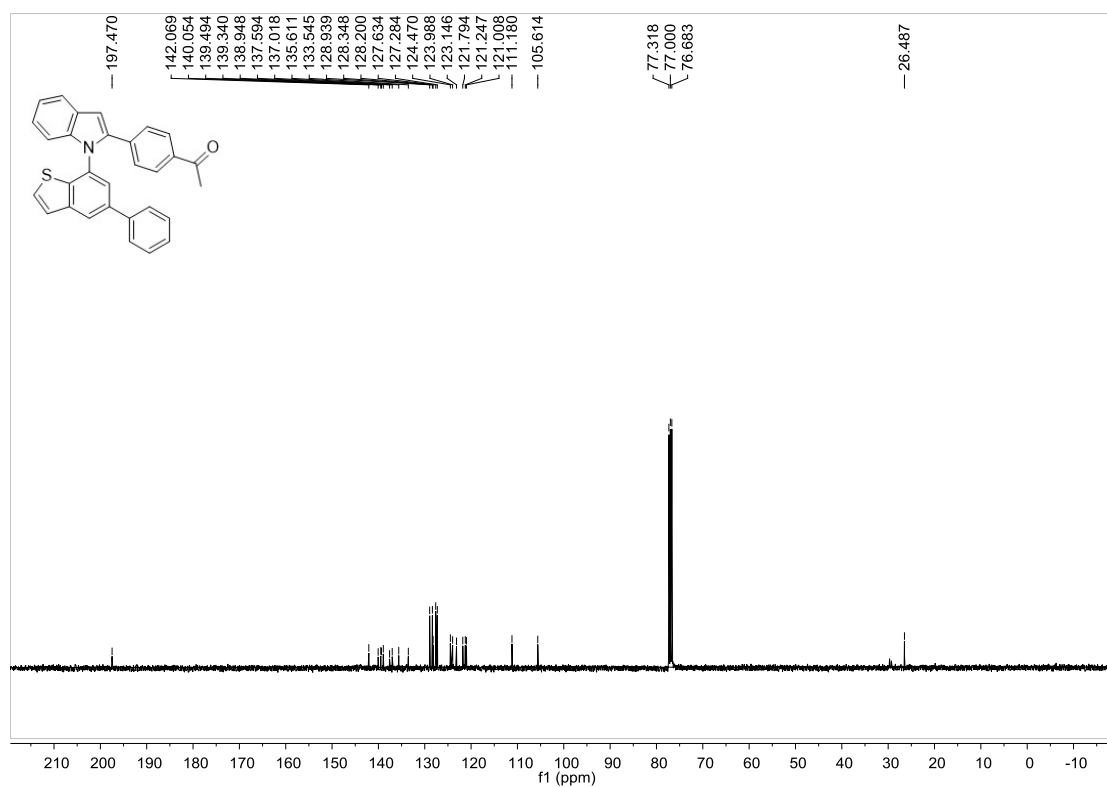

### <sup>1</sup>H NMR Spectrum of **69c**

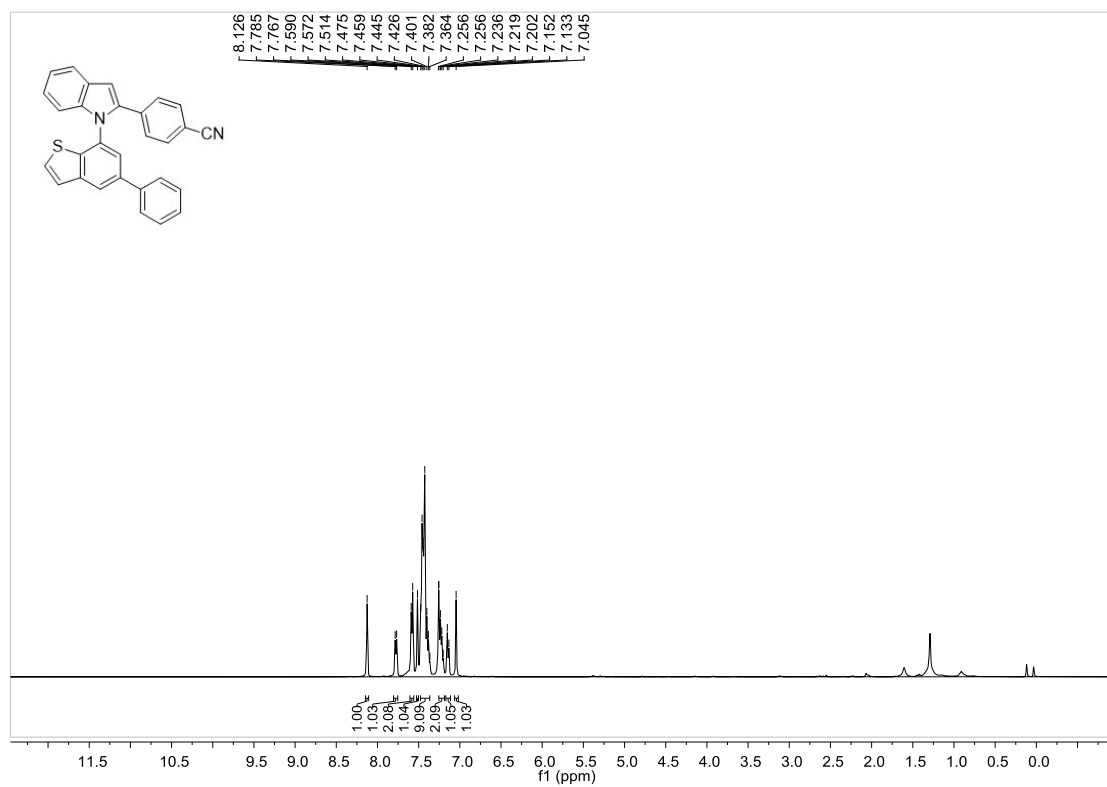

### <sup>13</sup>C NMR Spectrum of **69c**

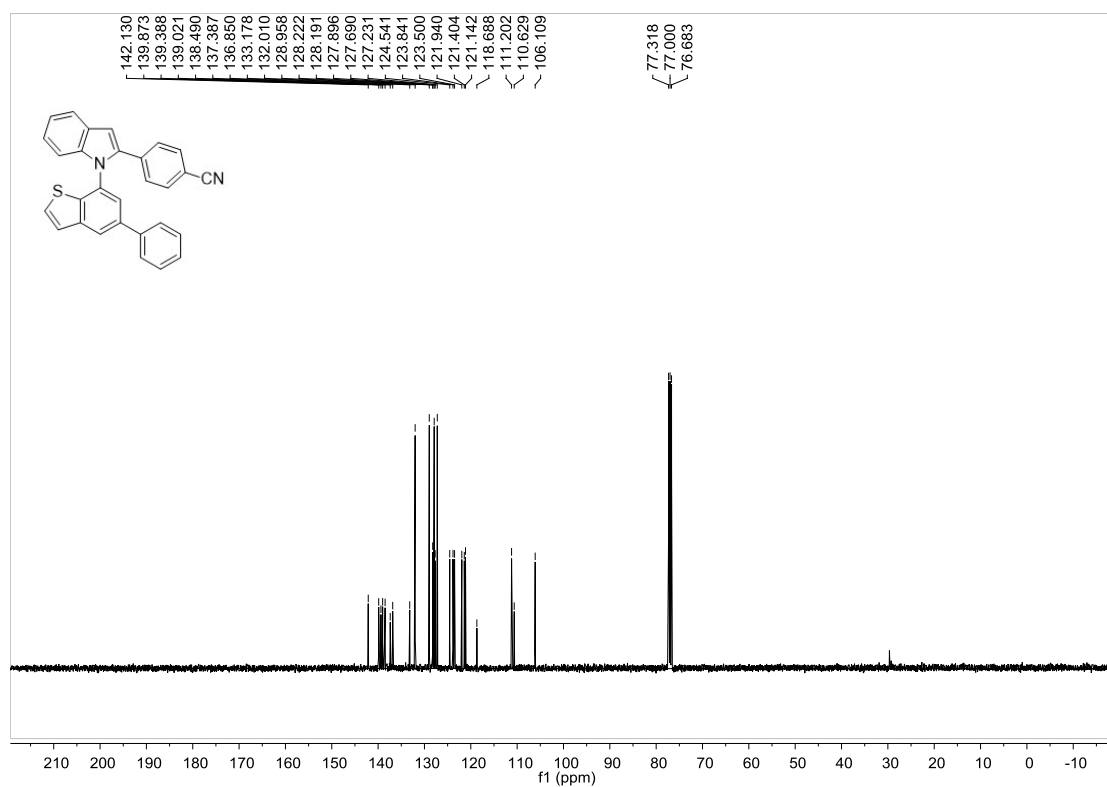

### <sup>1</sup>H NMR Spectrum of **70c**

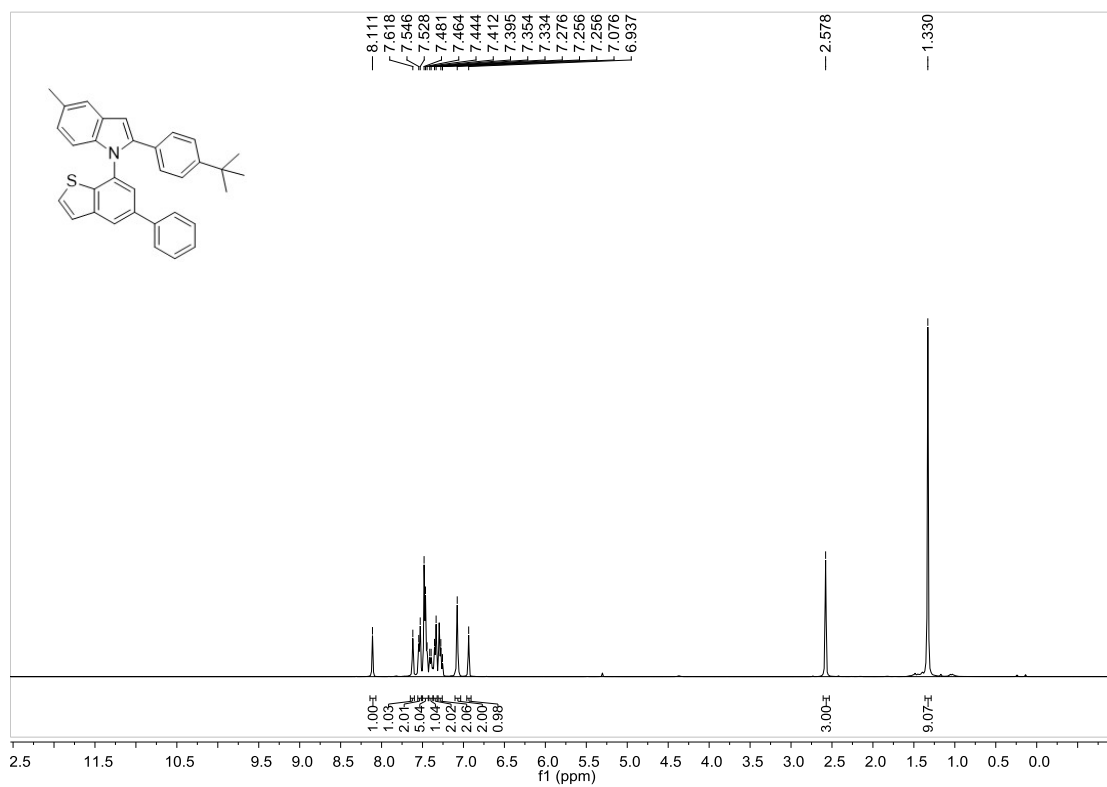

### <sup>13</sup>C NMR Spectrum of 70c

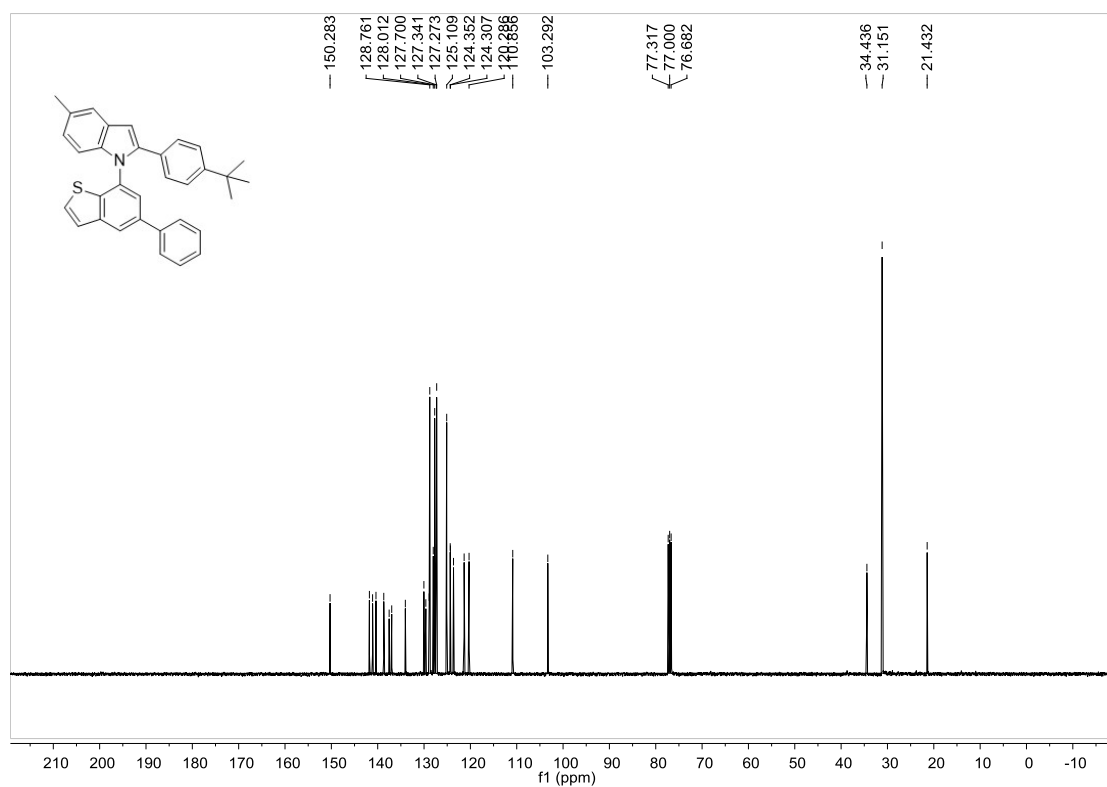

### <sup>1</sup>H NMR Spectrum of 71c

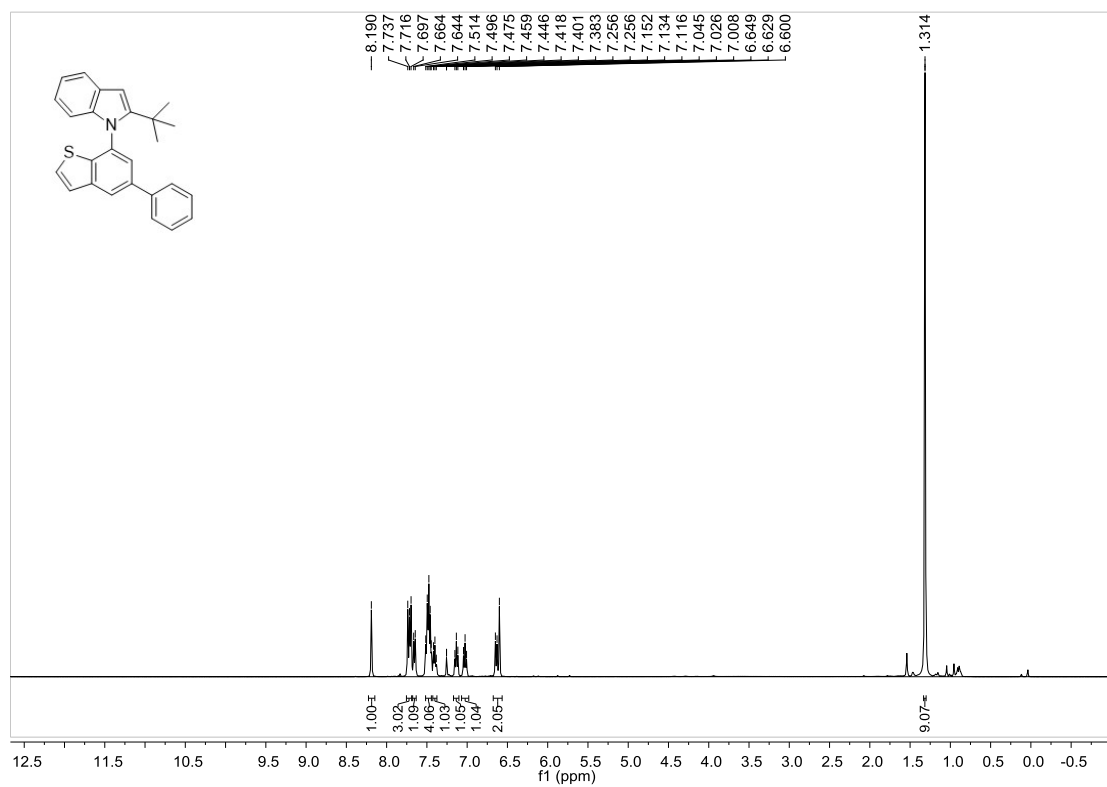

### <sup>13</sup>C NMR Spectrum of **71c**

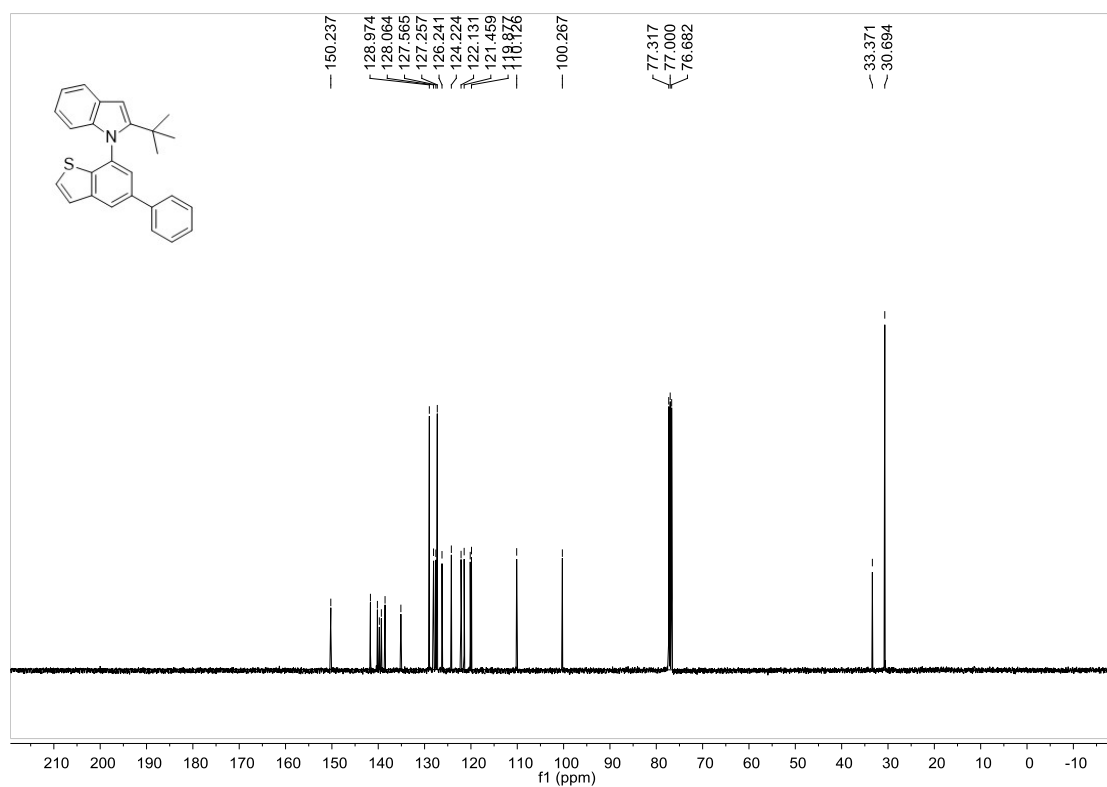

### <sup>1</sup>H NMR Spectrum of **72c**

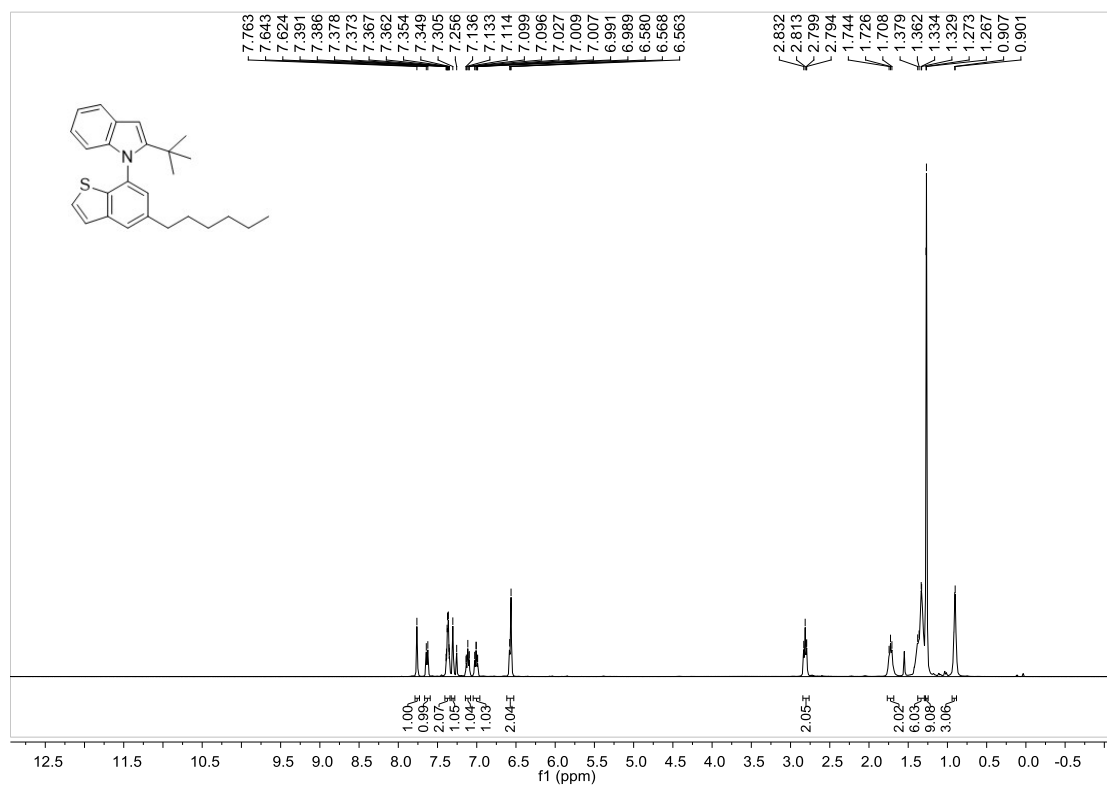

### <sup>13</sup>C NMR Spectrum of **72c**

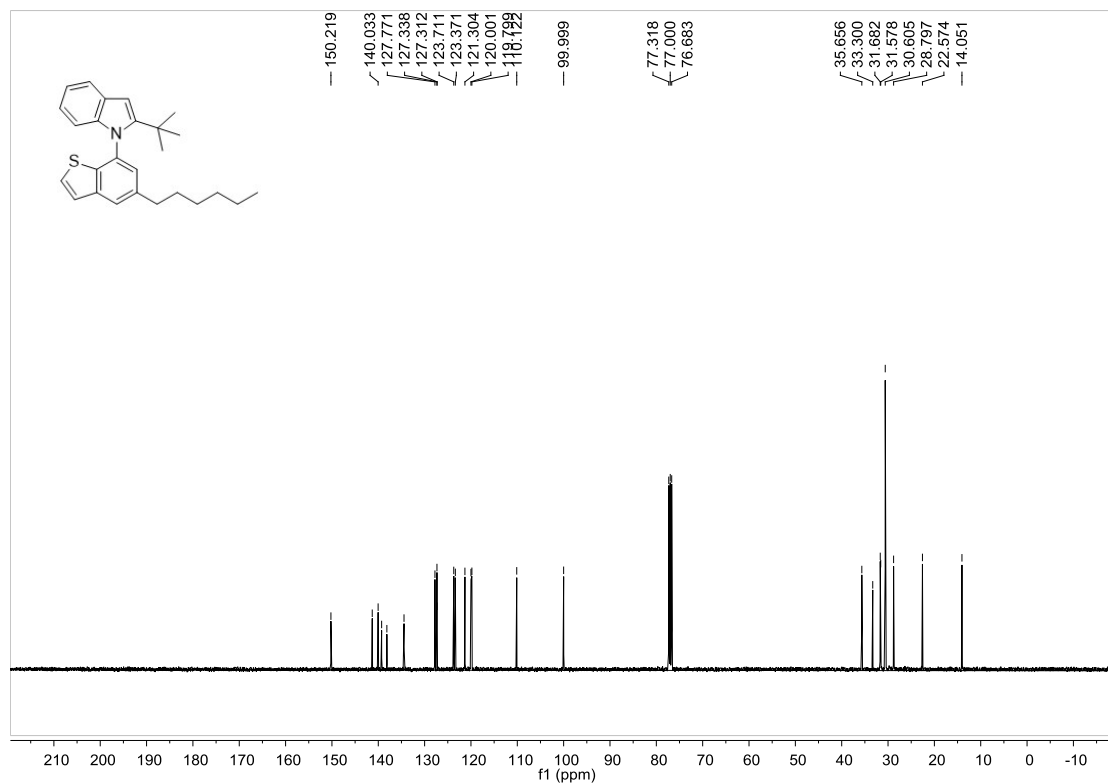

### <sup>1</sup>H NMR Spectrum of **73c**

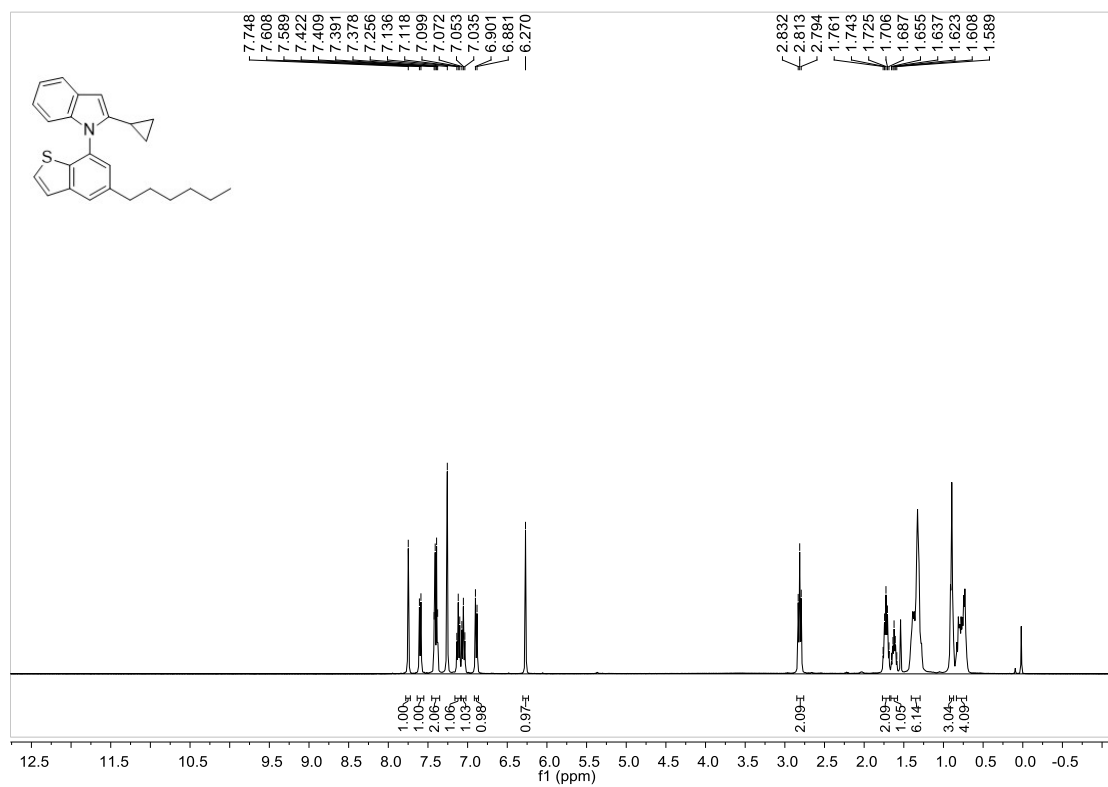

### <sup>13</sup>C NMR Spectrum of **73c**

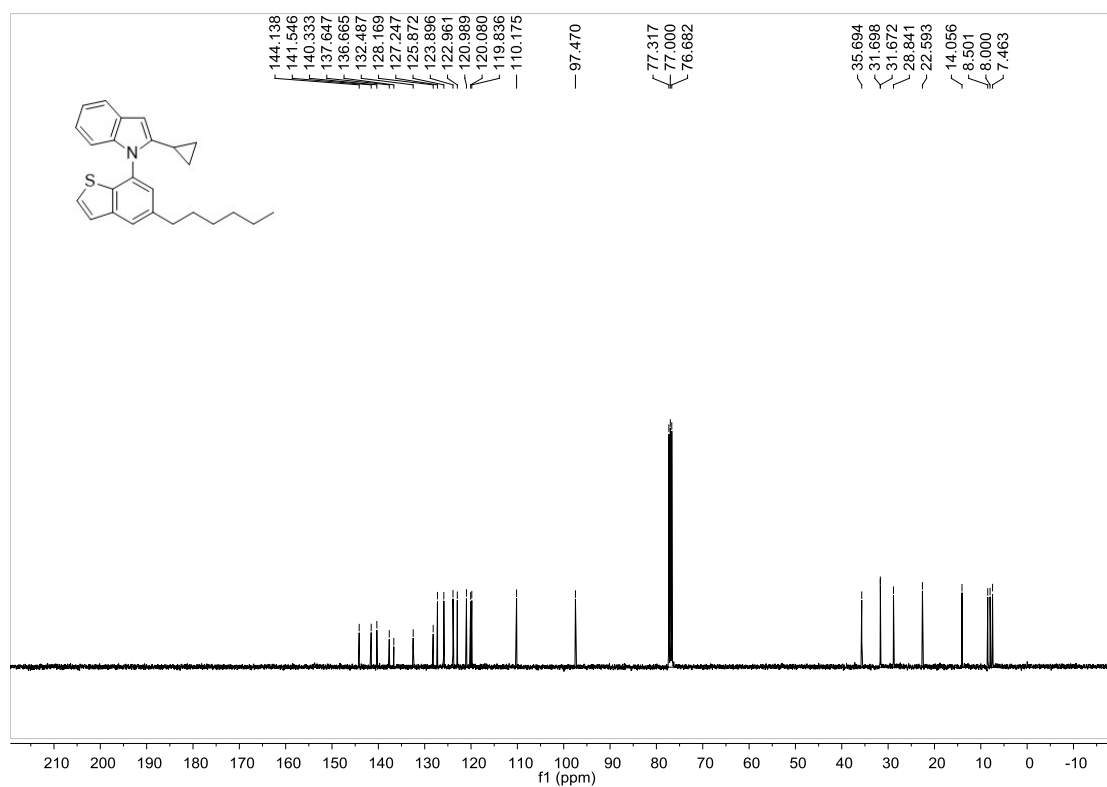

### <sup>1</sup>H NMR Spectrum of **74c**

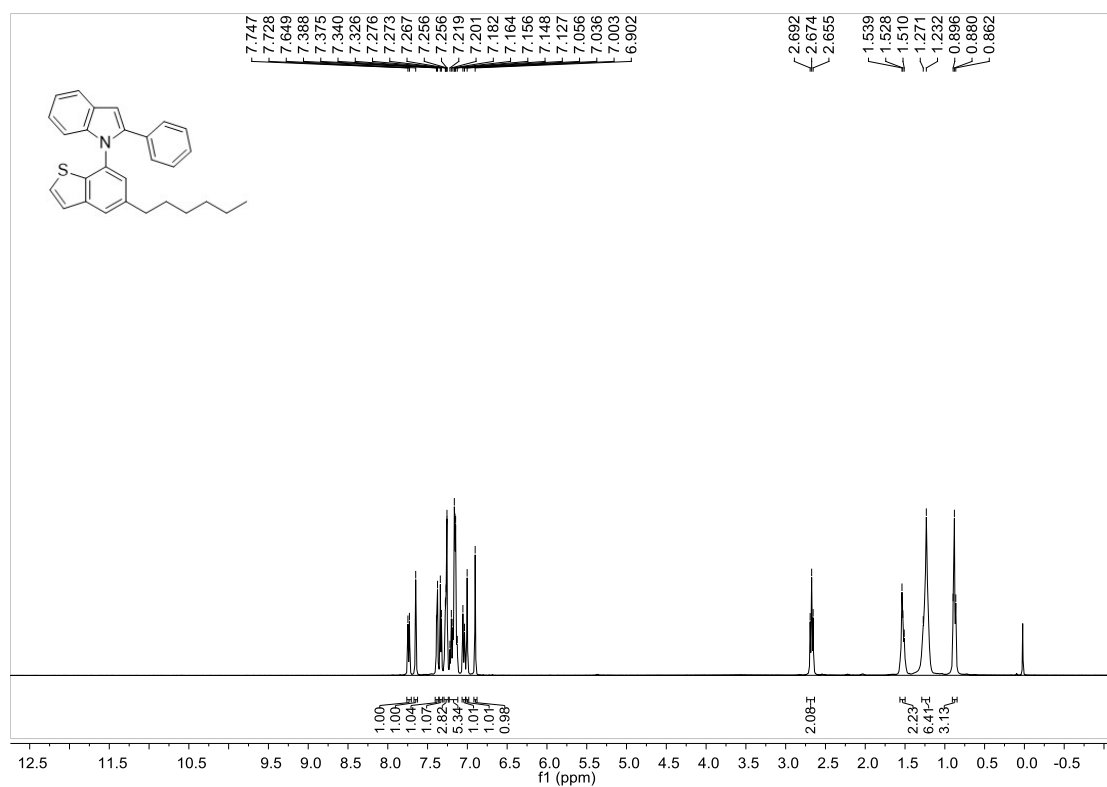



### <sup>13</sup>C NMR Spectrum of 74c

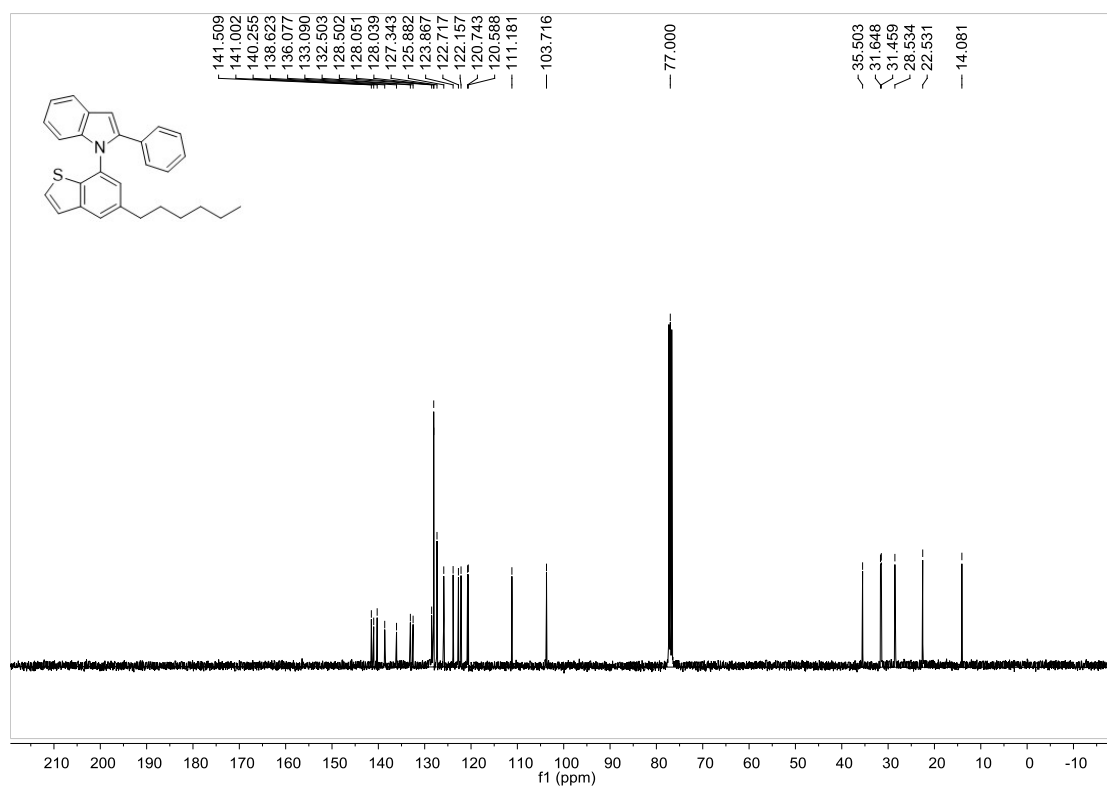

### <sup>1</sup>H NMR Spectrum of 75c

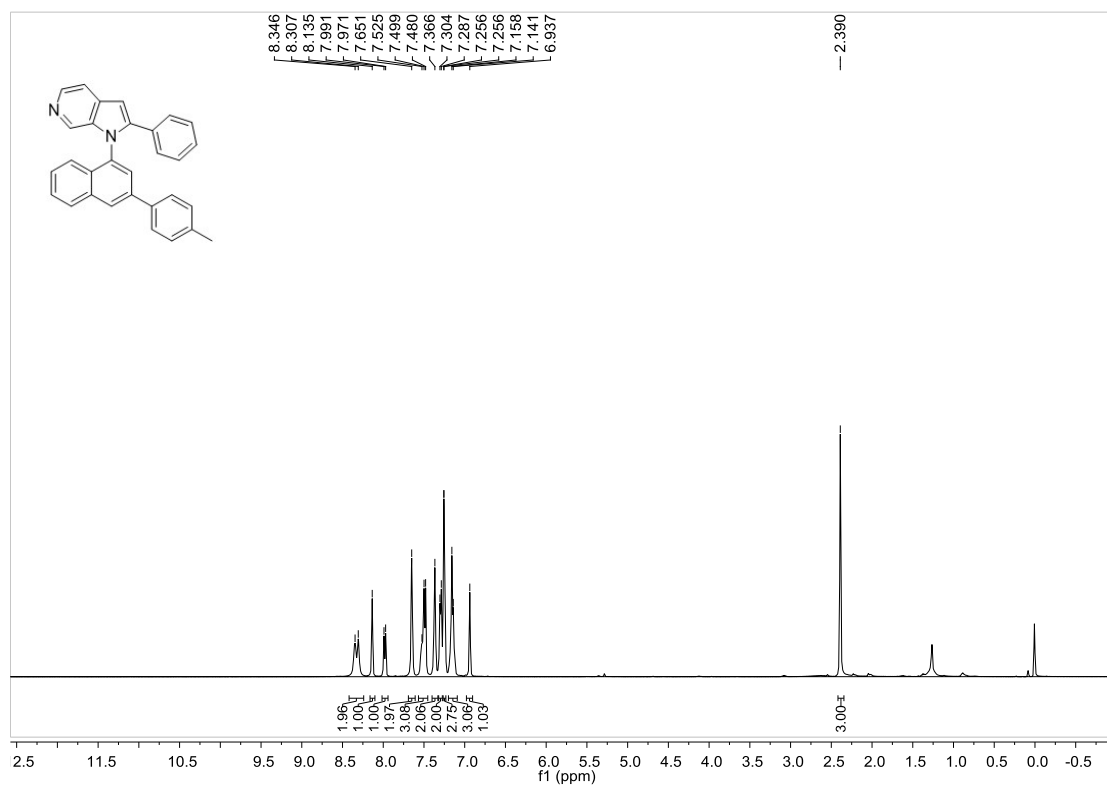

### <sup>13</sup>C NMR Spectrum of 75c

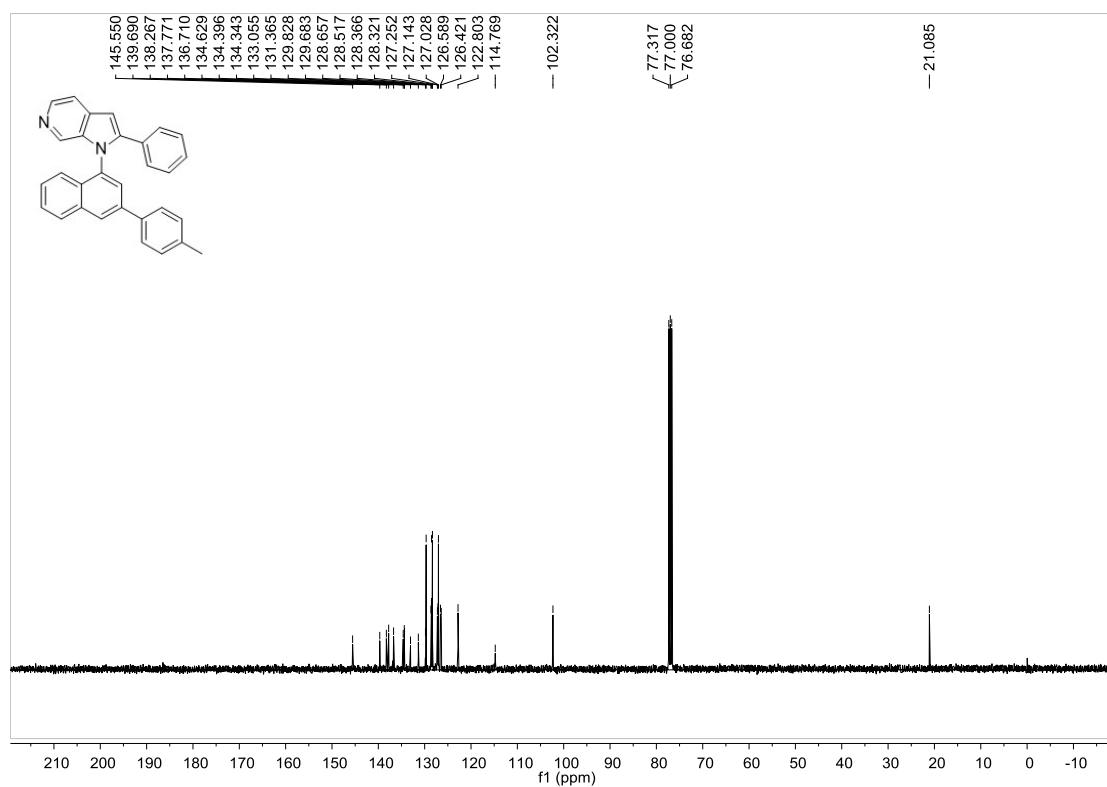

### <sup>1</sup>H NMR Spectrum of 76c

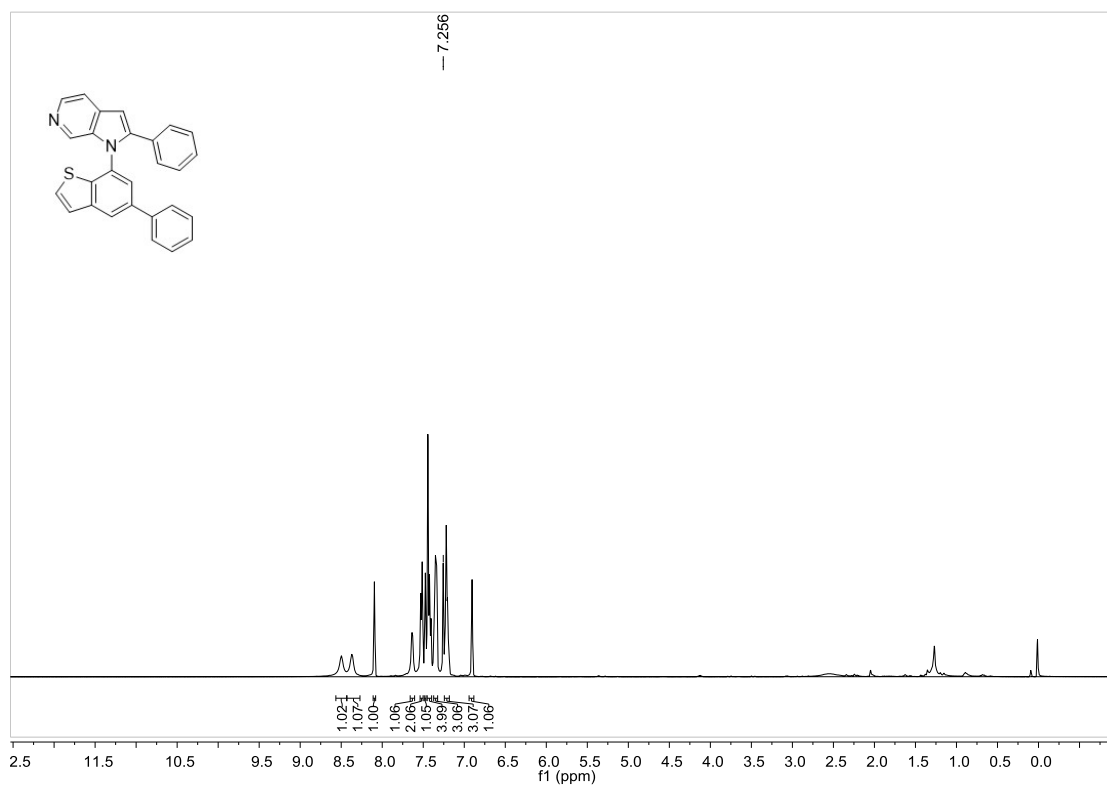

### <sup>13</sup>C NMR Spectrum of **76c**

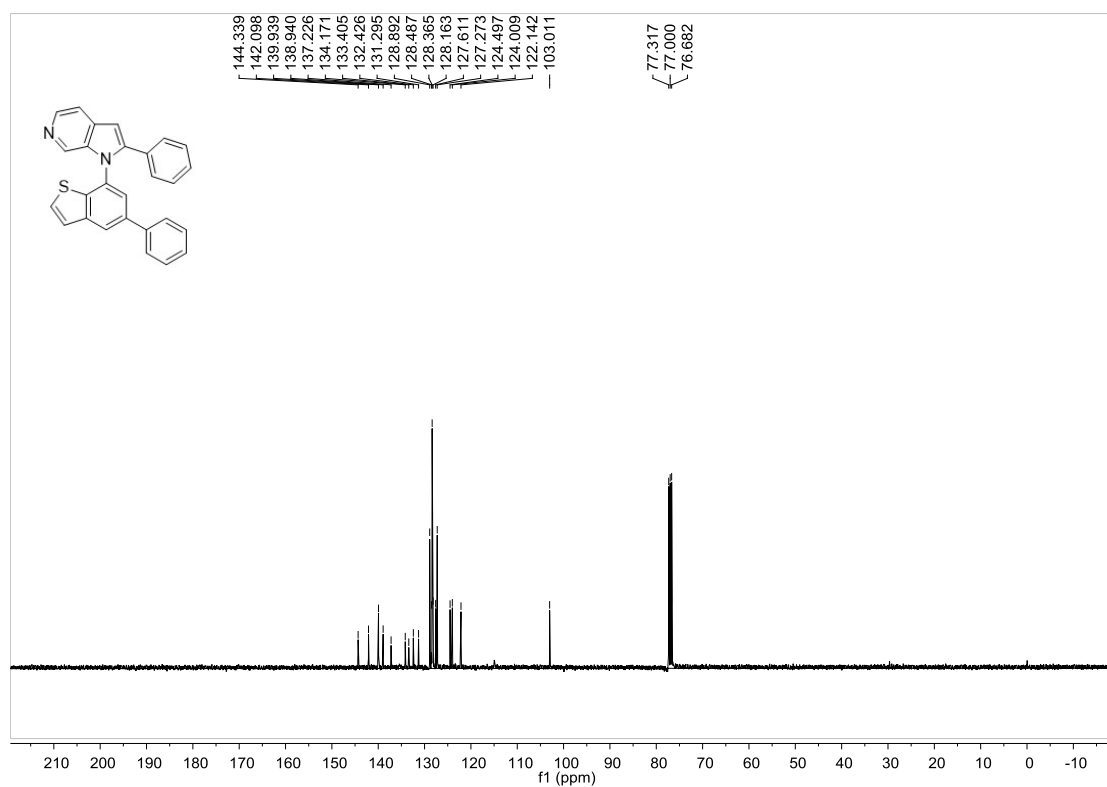

### <sup>1</sup>H NMR Spectrum of **77c**

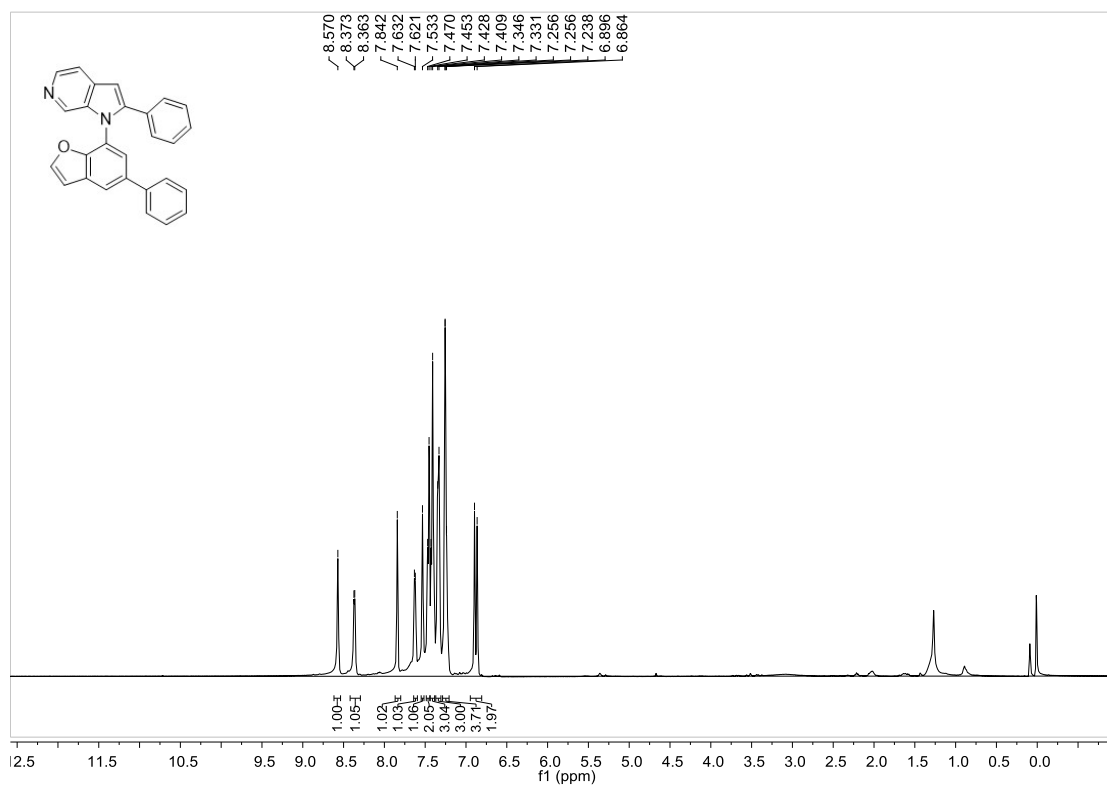

### <sup>13</sup>C NMR Spectrum of **77c**

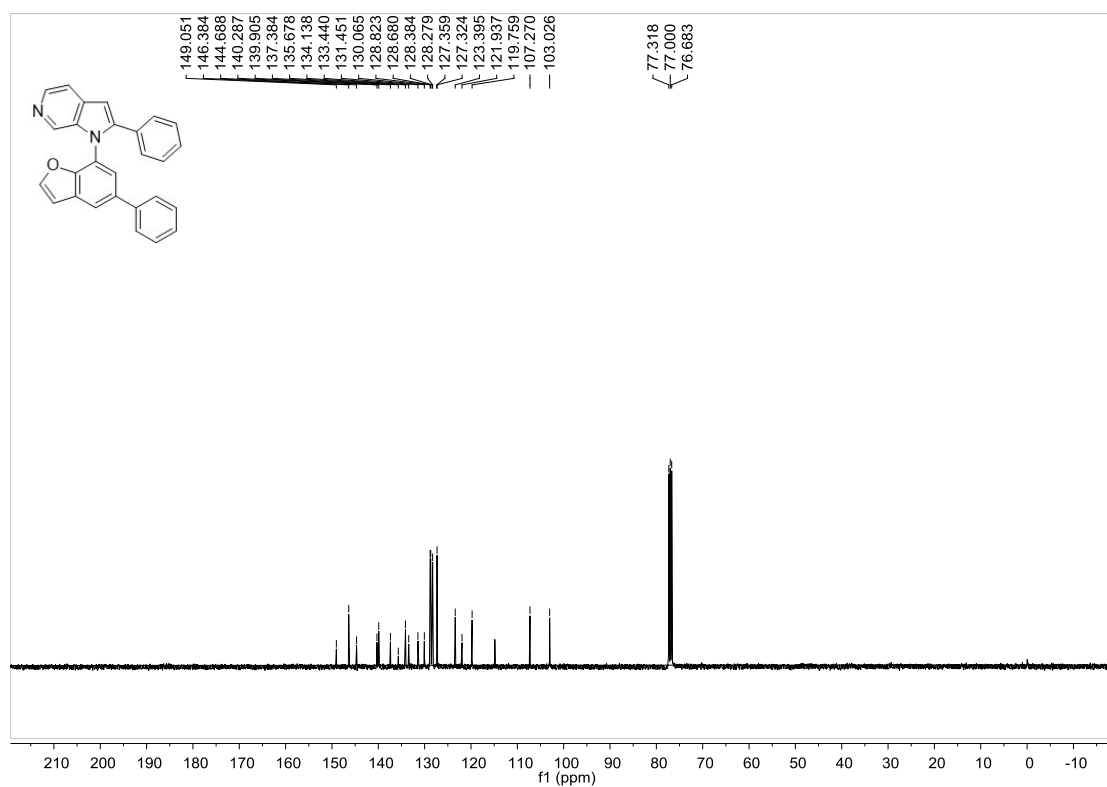

### <sup>1</sup>H NMR Spectrum of **78c**

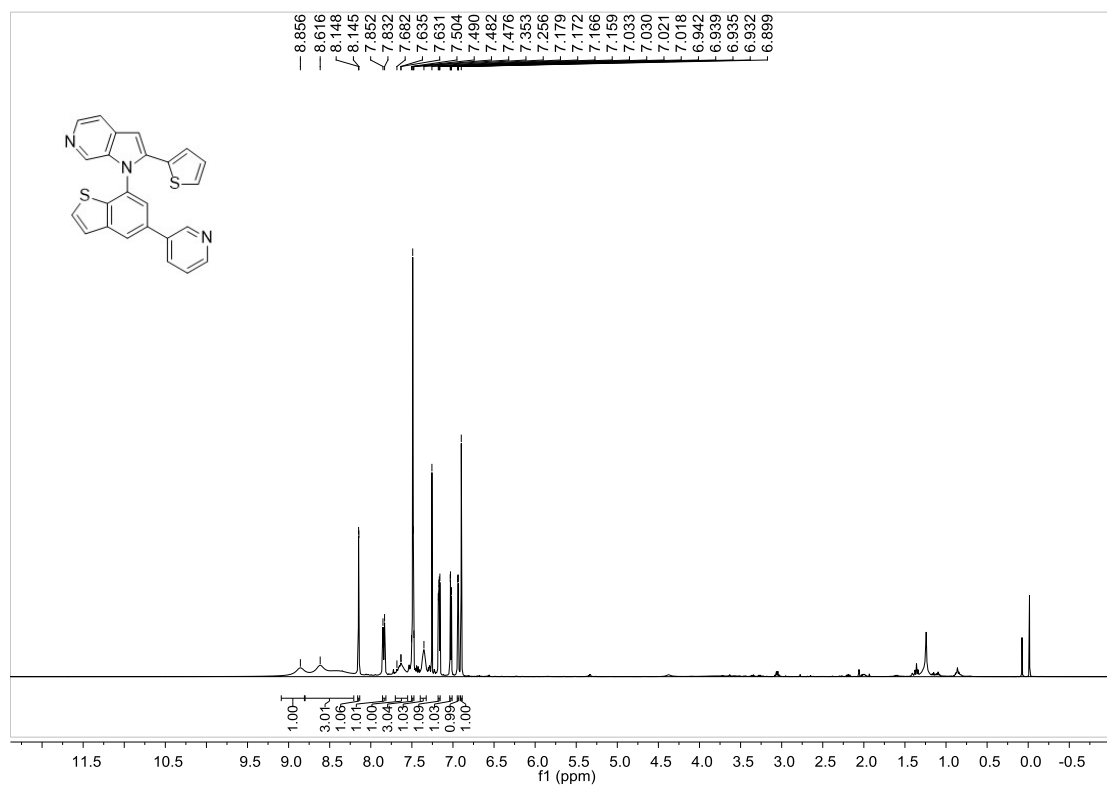

### <sup>13</sup>C NMR Spectrum of 78c

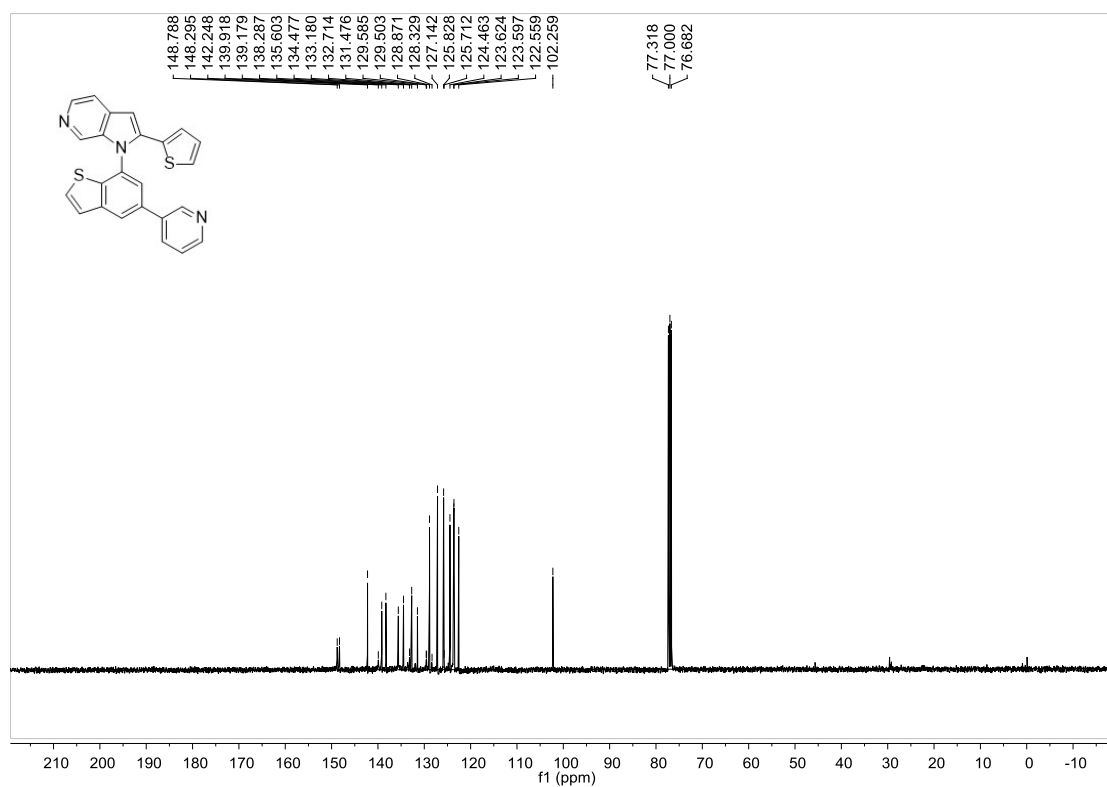

### <sup>1</sup>H NMR Spectrum of 79c

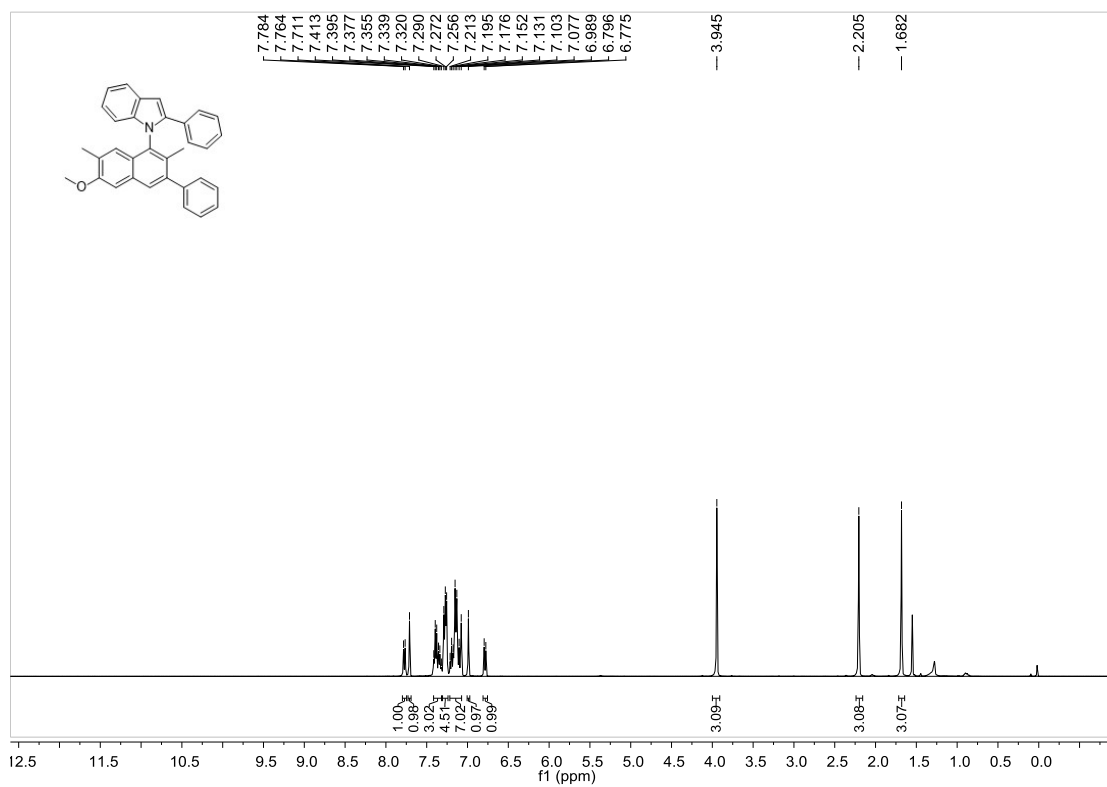

### <sup>13</sup>C NMR Spectrum of **79c**

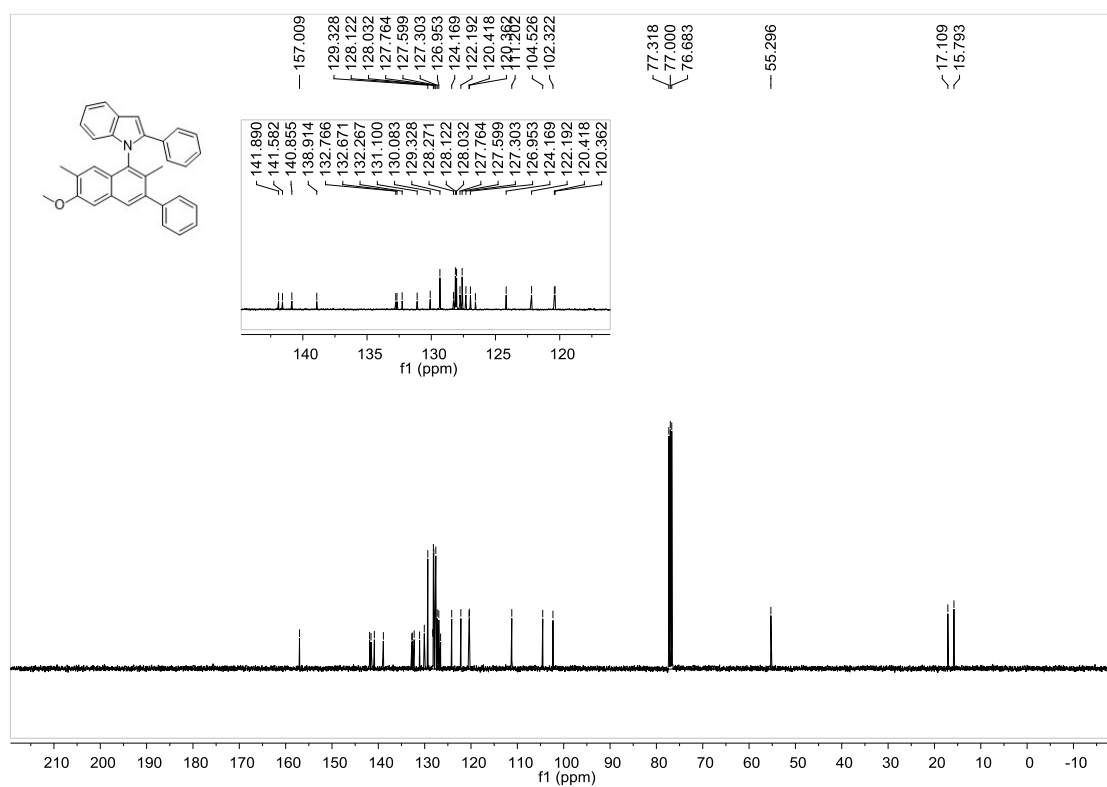

### <sup>1</sup>H NMR Spectrum of **80c**

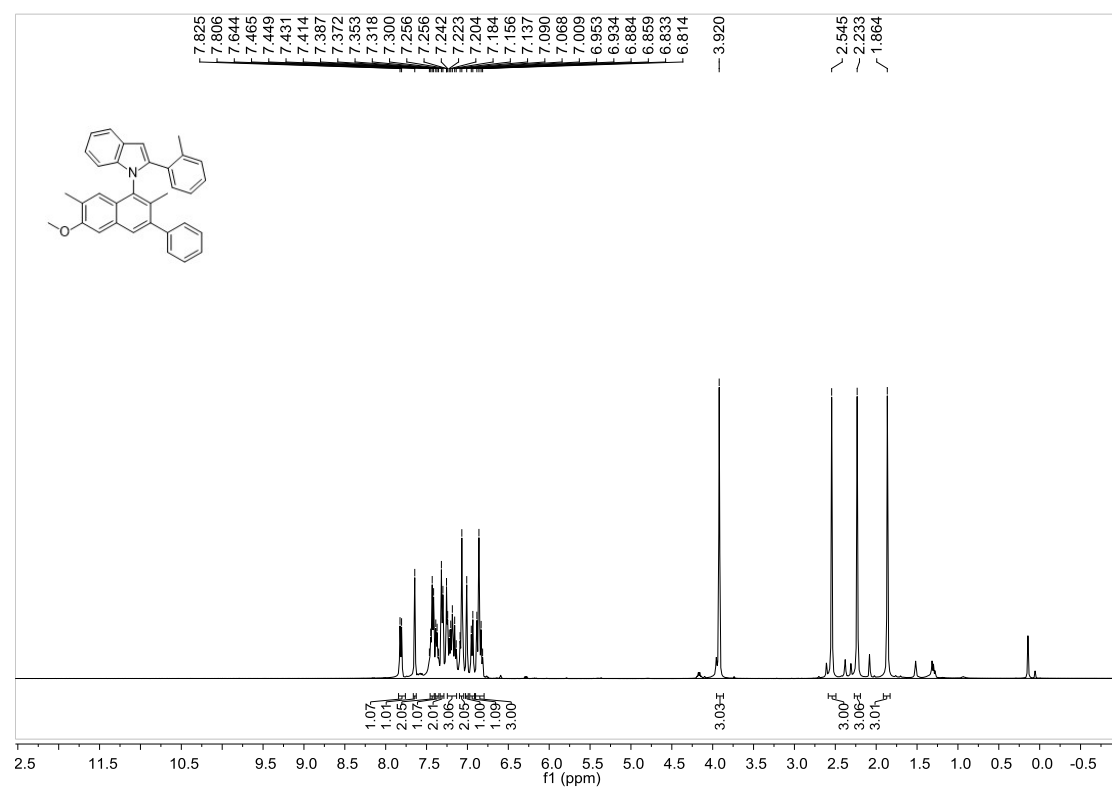

### <sup>13</sup>C NMR Spectrum of **80c**

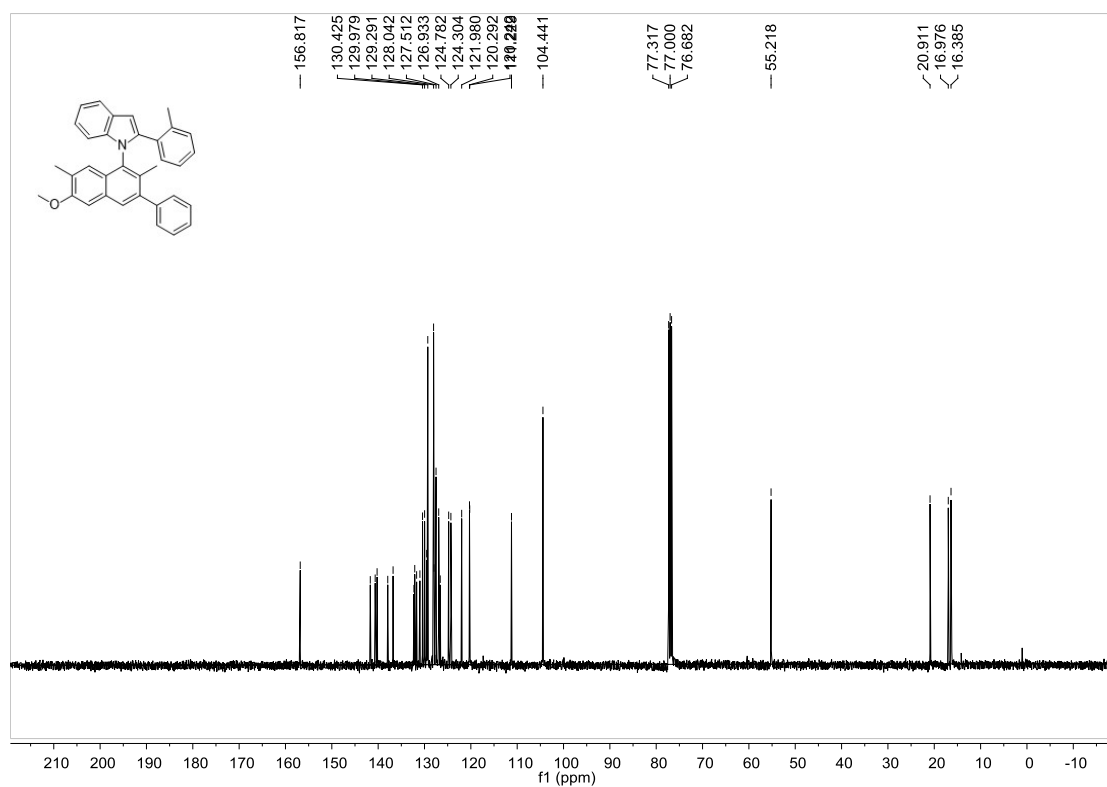

### <sup>1</sup>H NMR Spectrum of **81c**

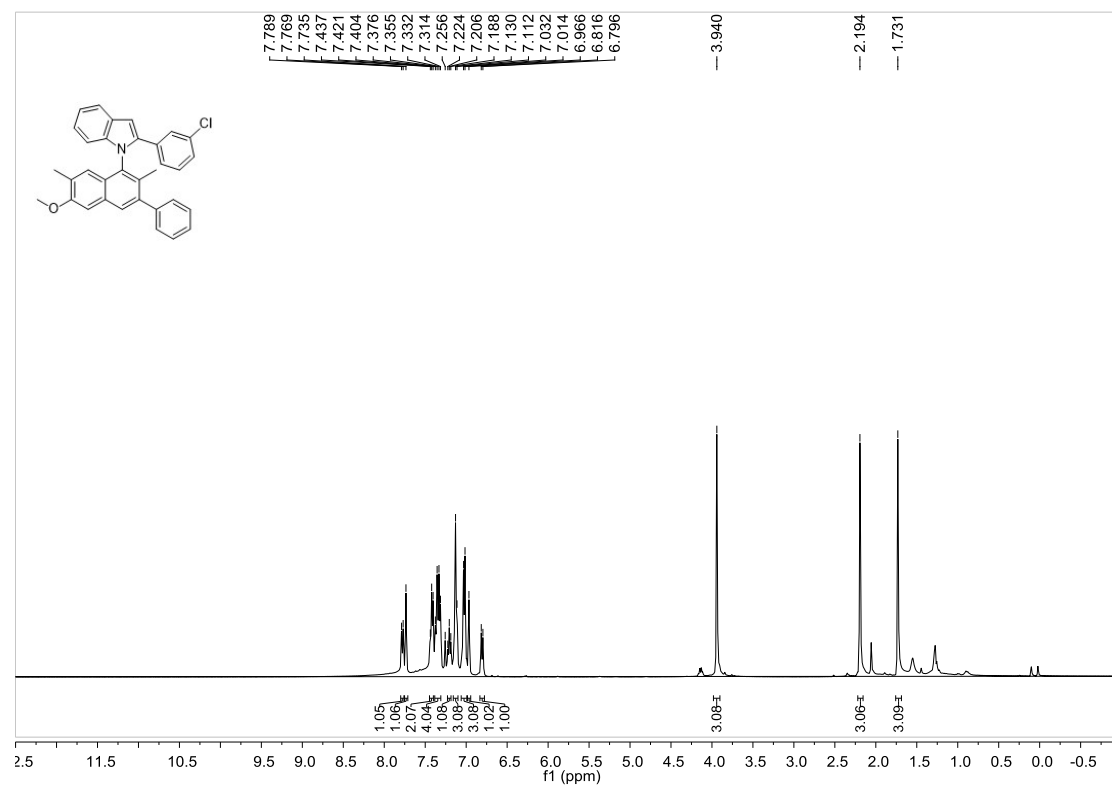

### <sup>13</sup>C NMR Spectrum of **81c**

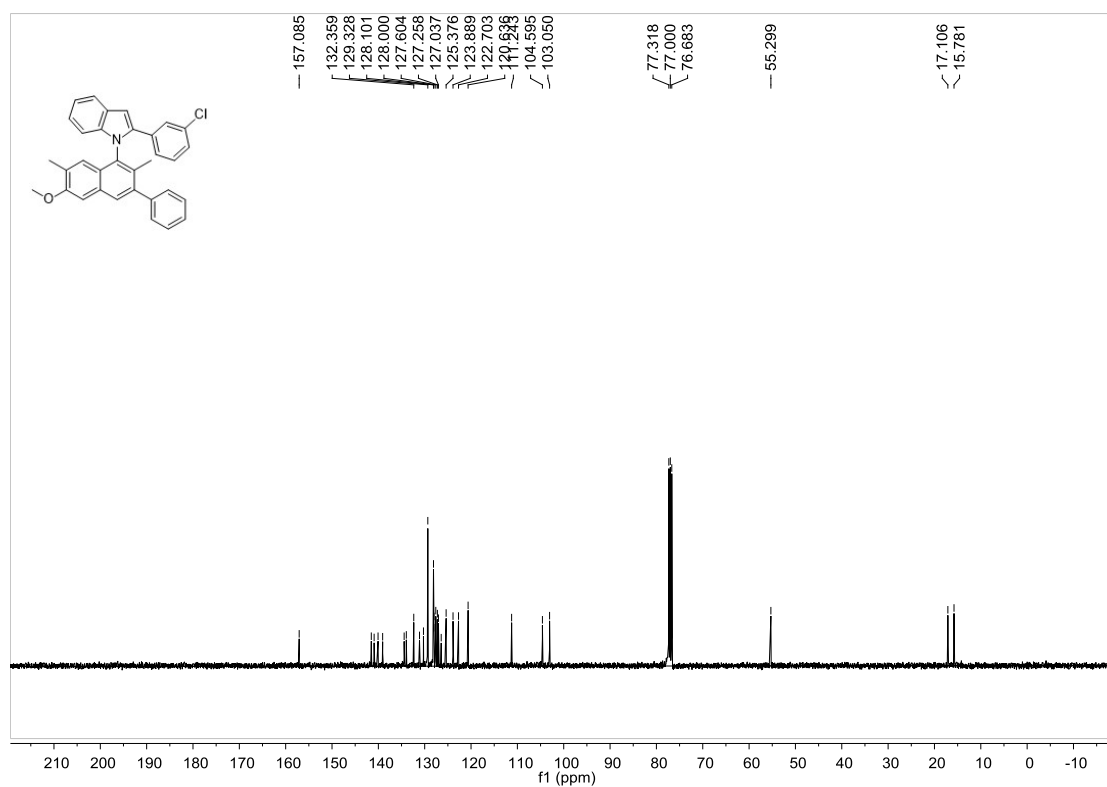

### <sup>1</sup>H NMR Spectrum of **1e**

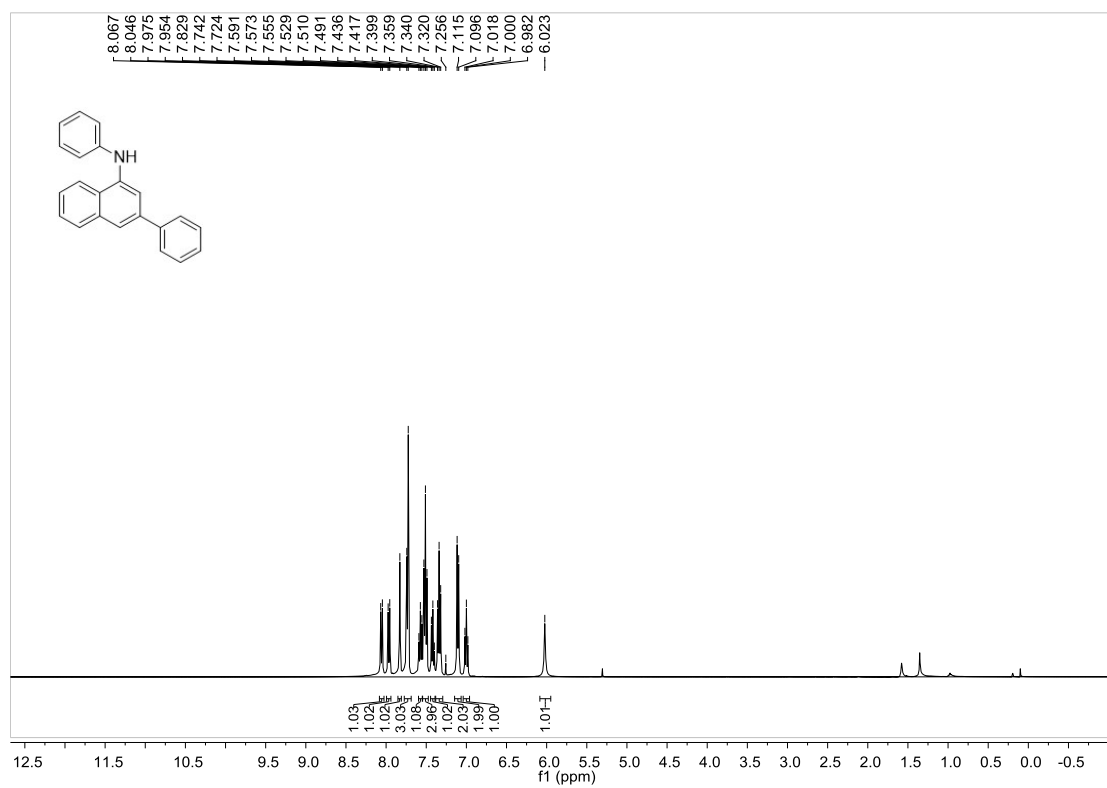



### <sup>13</sup>C NMR Spectrum of **1e**

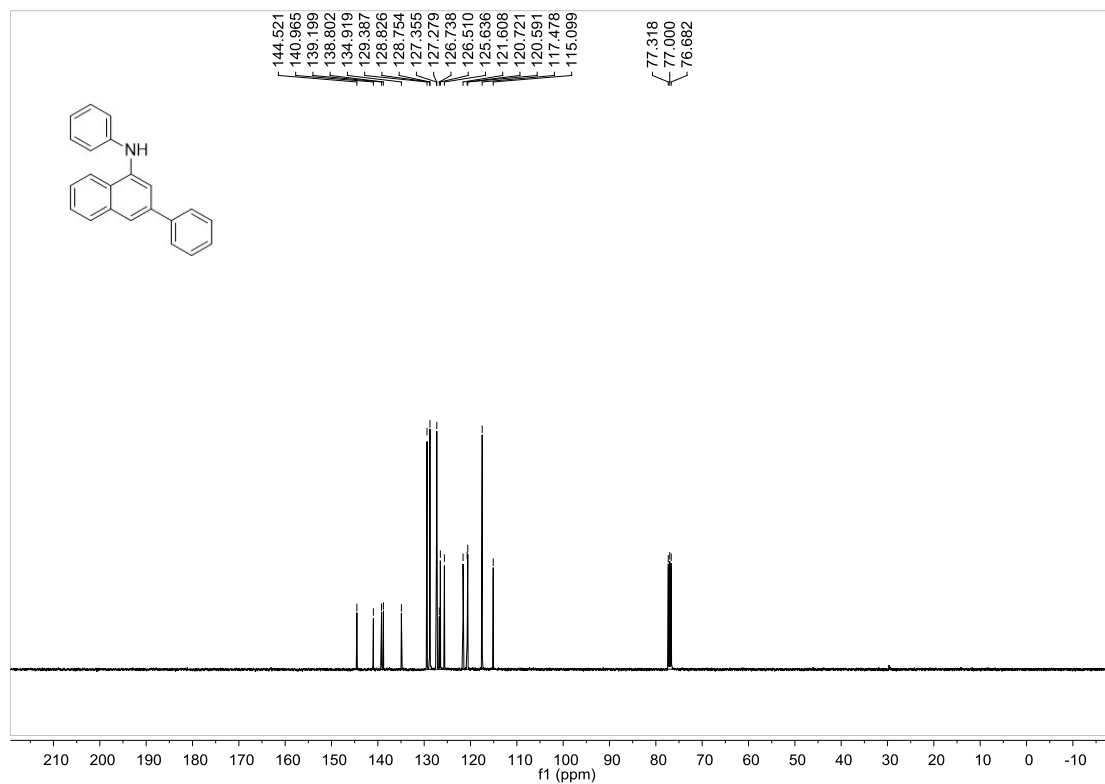

### <sup>1</sup>H NMR Spectrum of **2e**

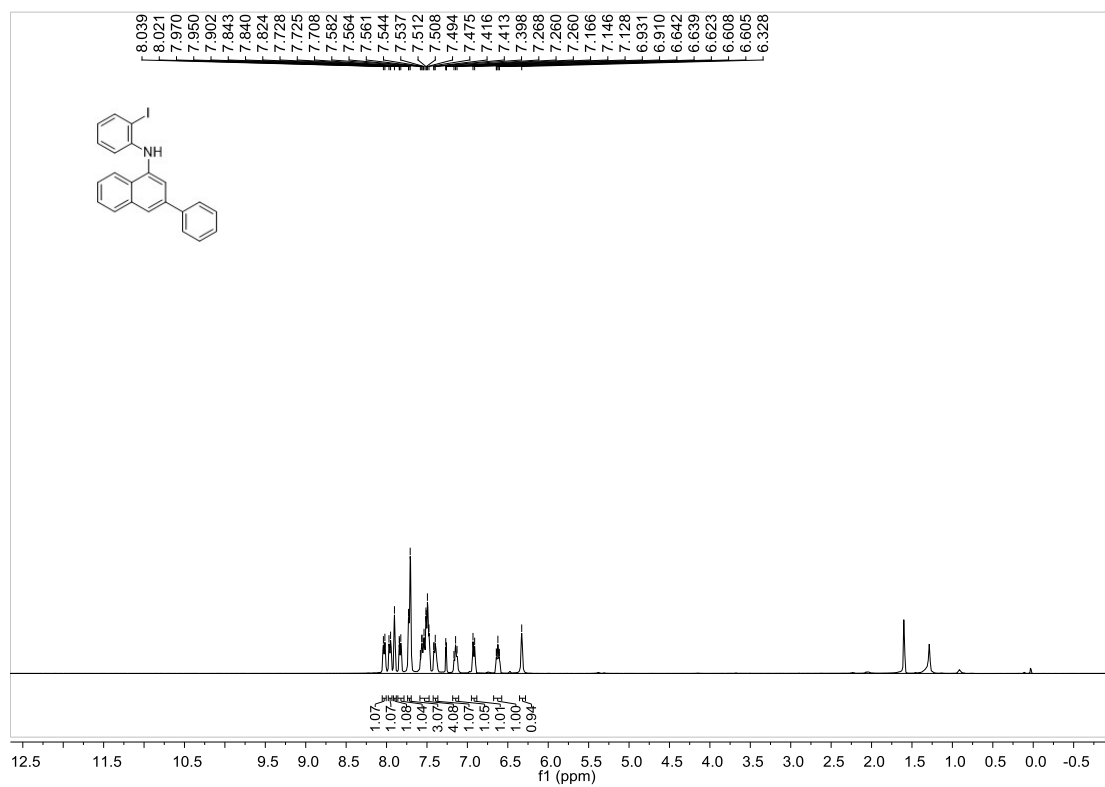

### <sup>13</sup>C NMR Spectrum of **2e**

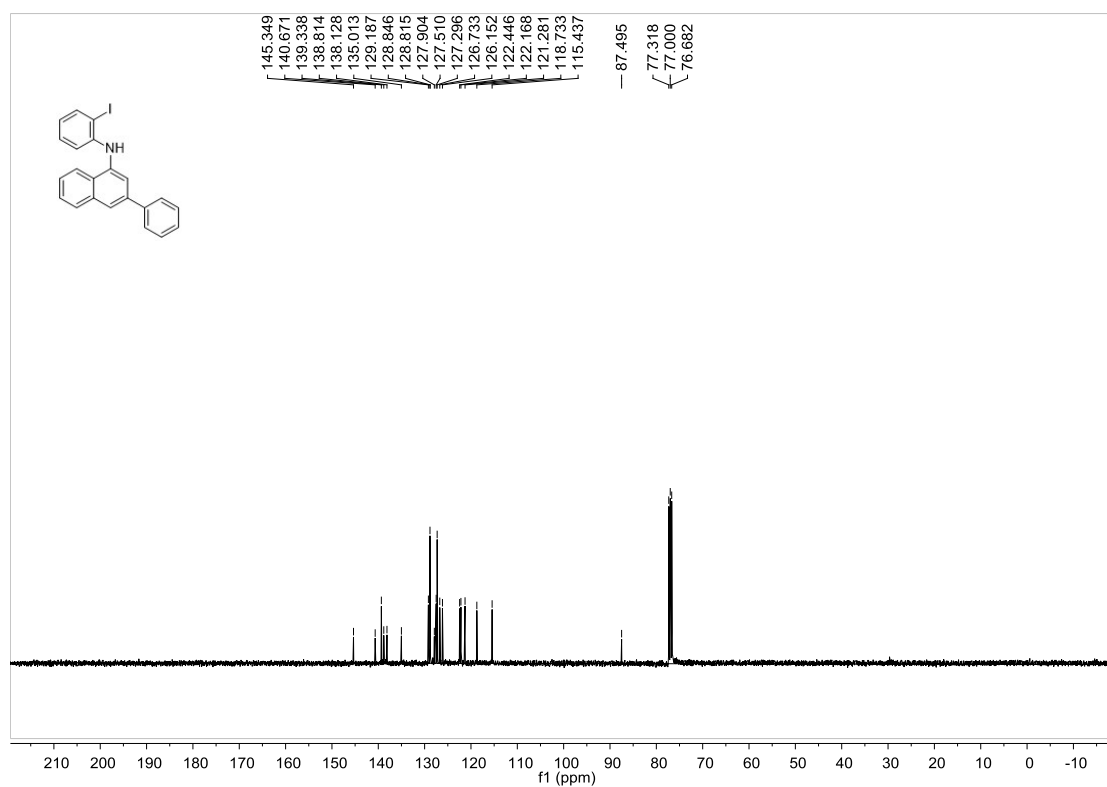

### <sup>1</sup>H NMR Spectrum of **1e'**

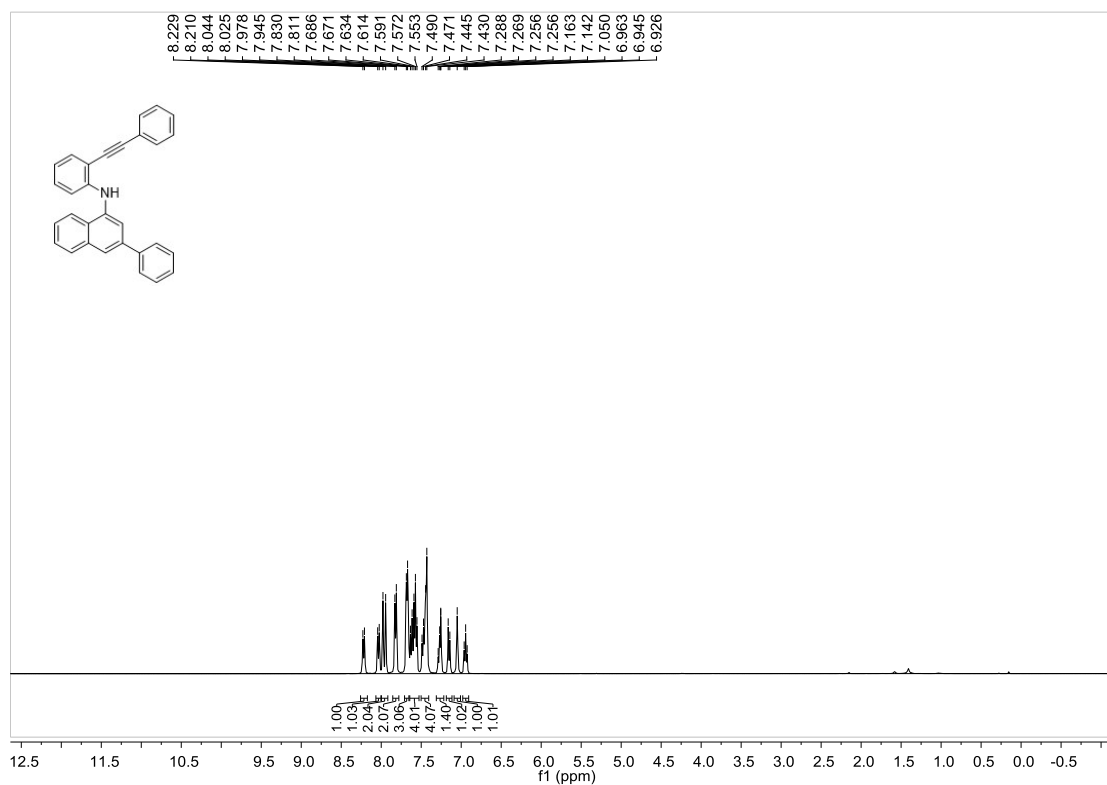

### <sup>13</sup>C NMR Spectrum of **1e'**

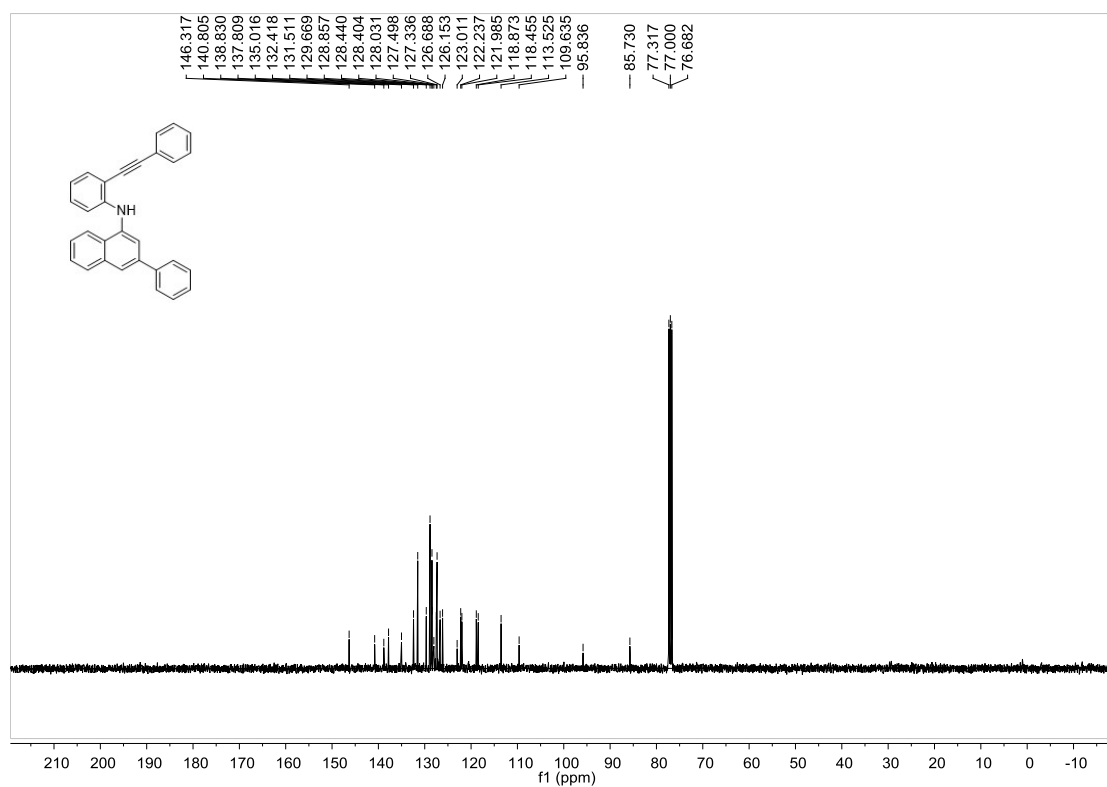

### <sup>1</sup>H NMR Spectrum of **3a**

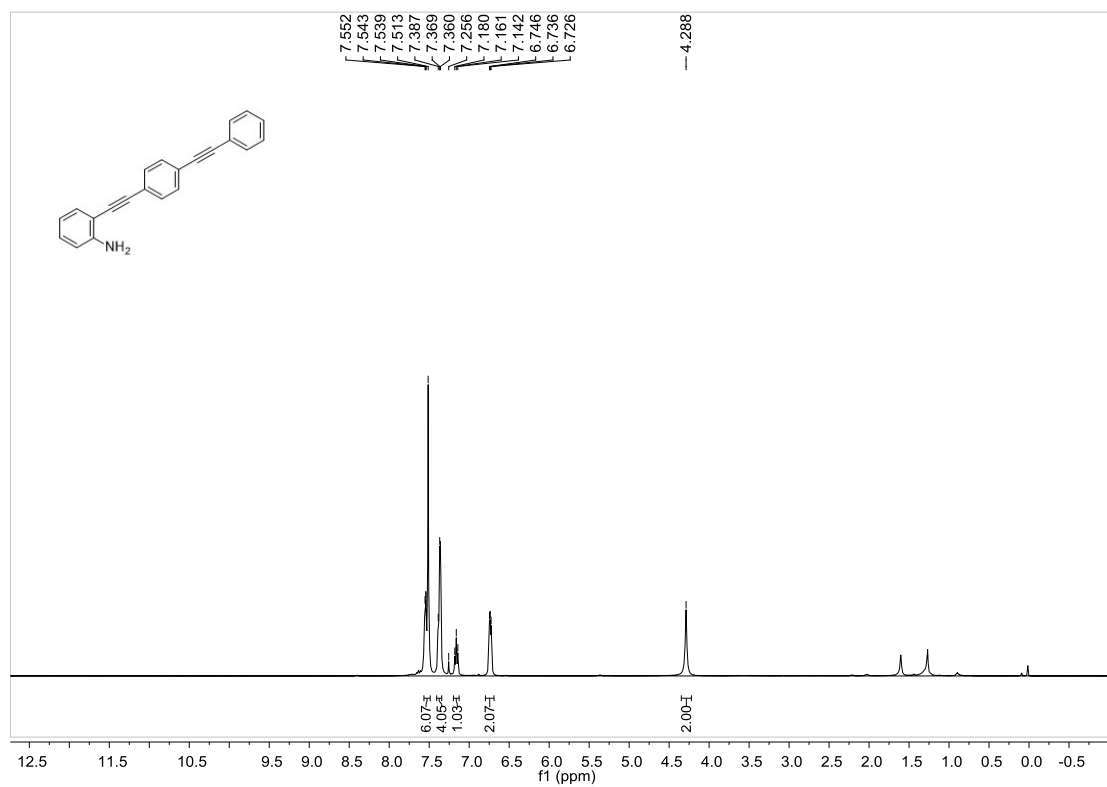

### <sup>13</sup>C NMR Spectrum of **3a**

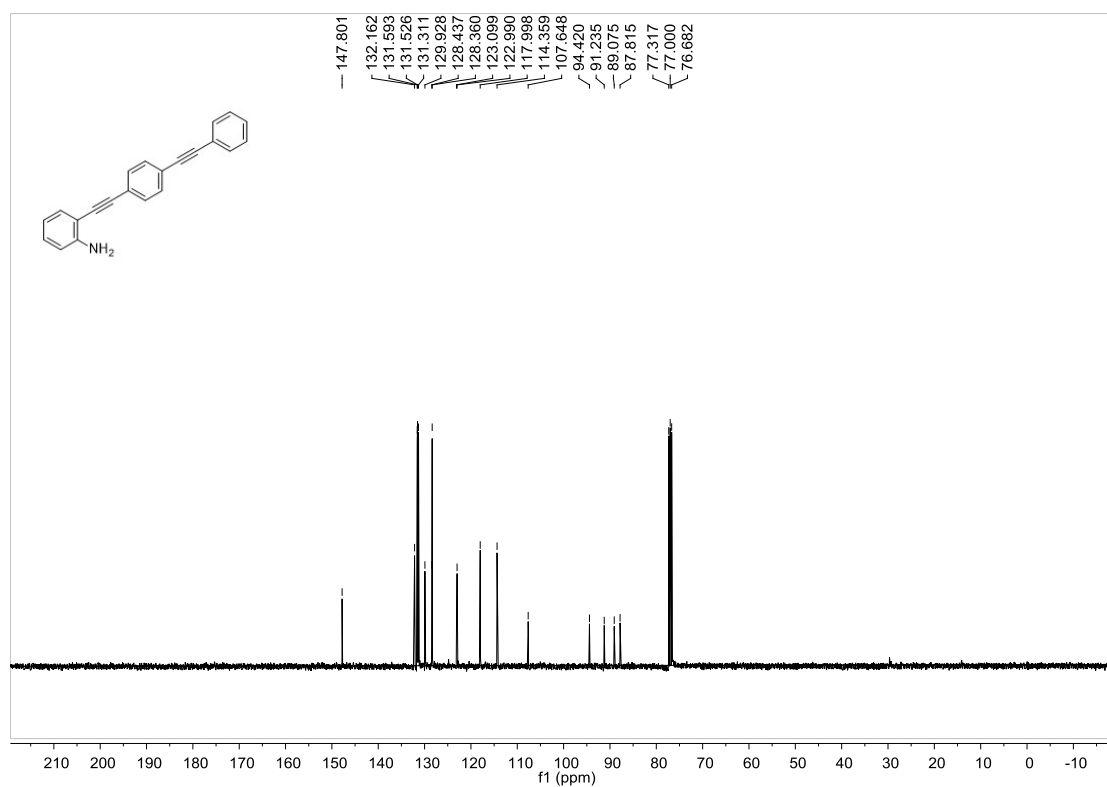

### <sup>1</sup>H NMR Spectrum of **4a**

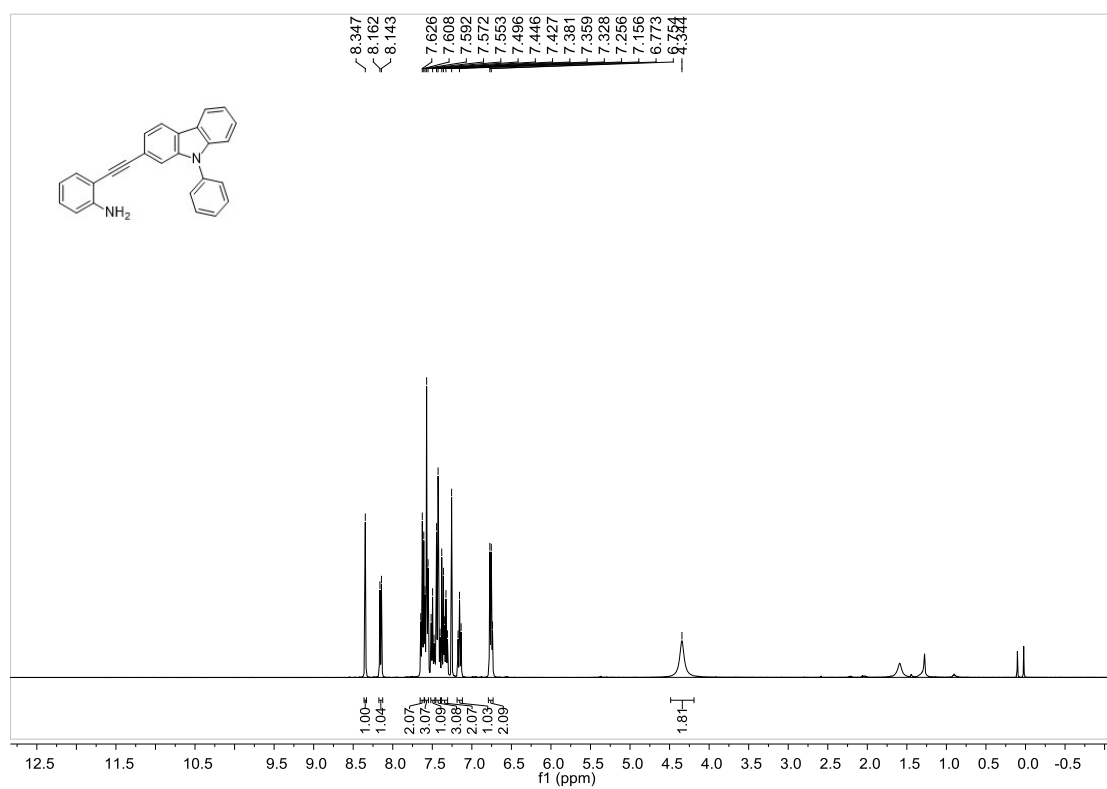

### <sup>13</sup>C NMR Spectrum of **4a**

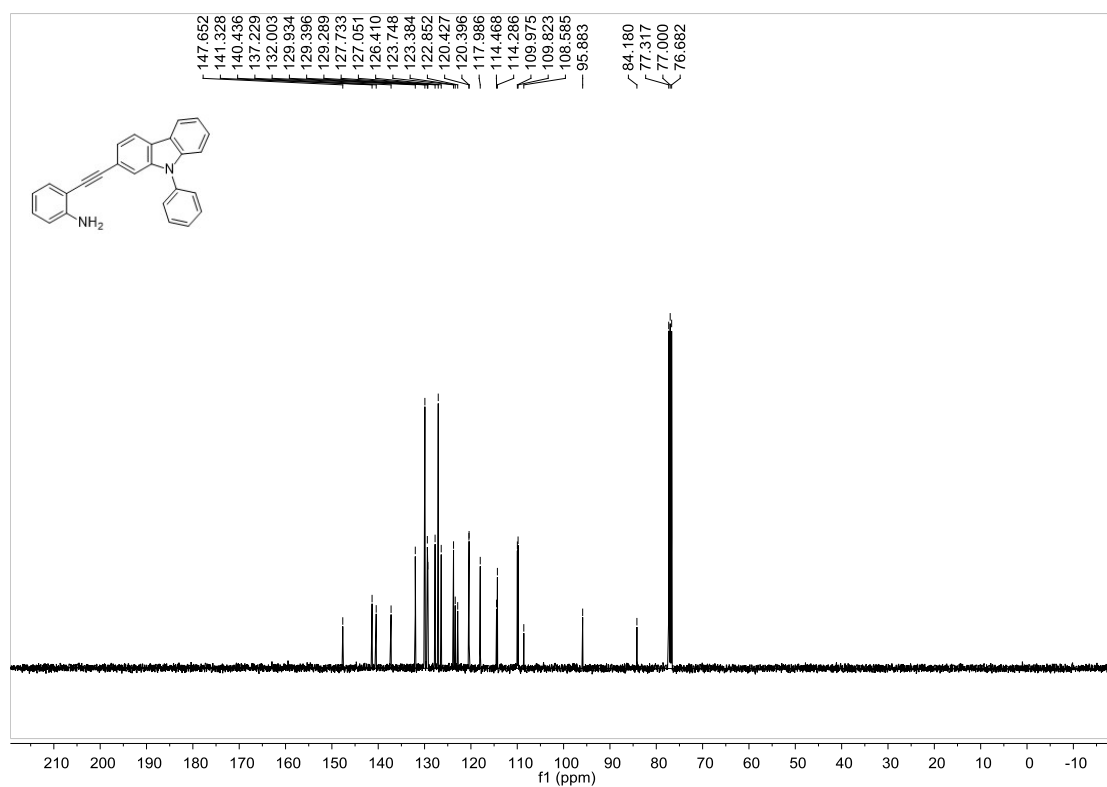

### <sup>1</sup>H NMR Spectrum of **5a**

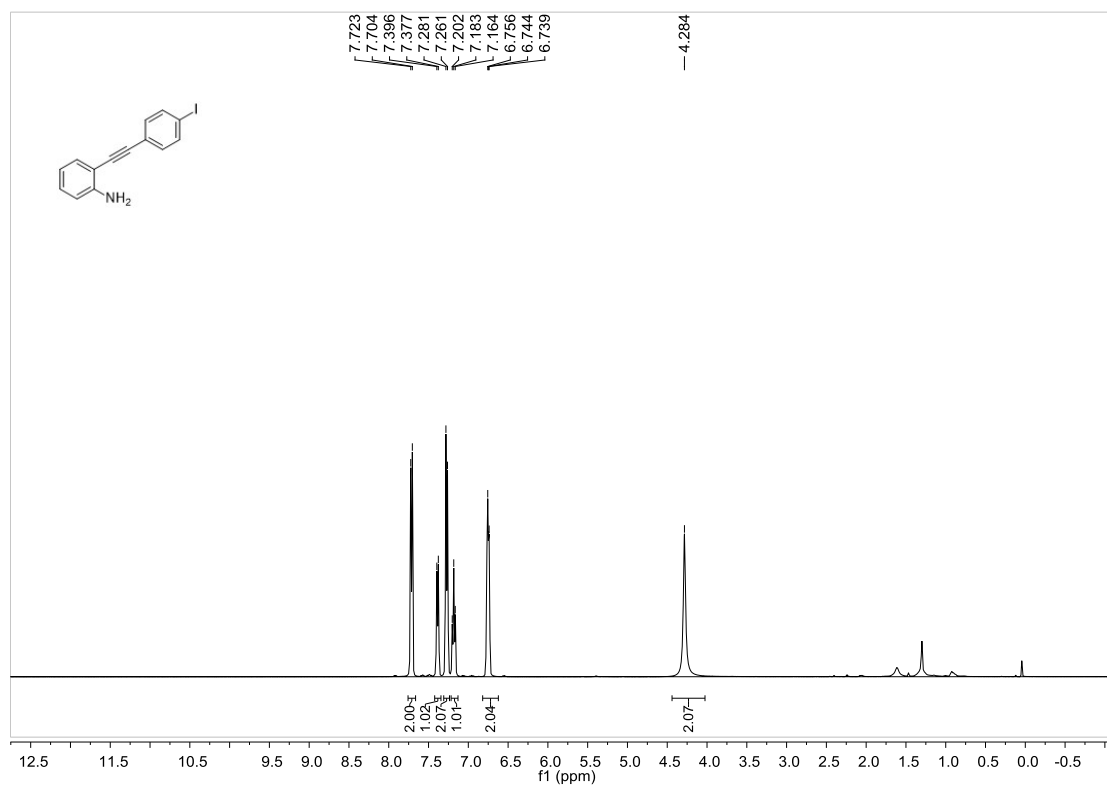

### <sup>13</sup>C NMR Spectrum of **5a**

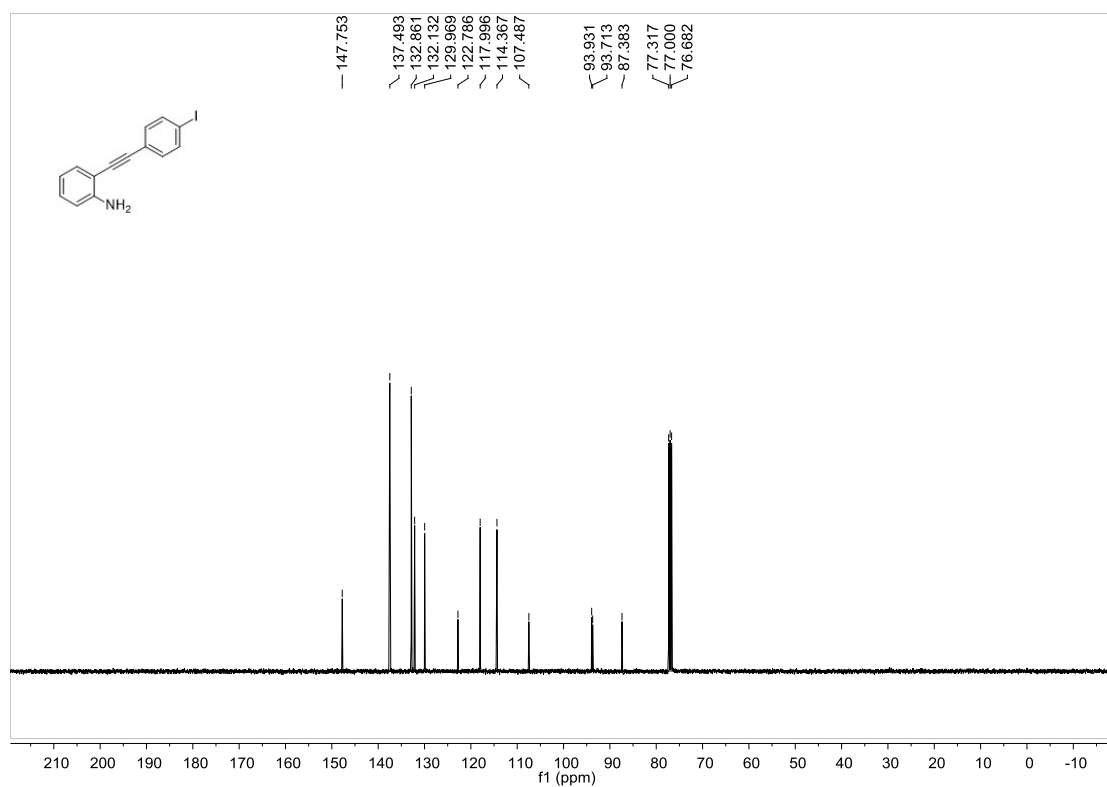

### <sup>1</sup>H NMR Spectrum of **6a**

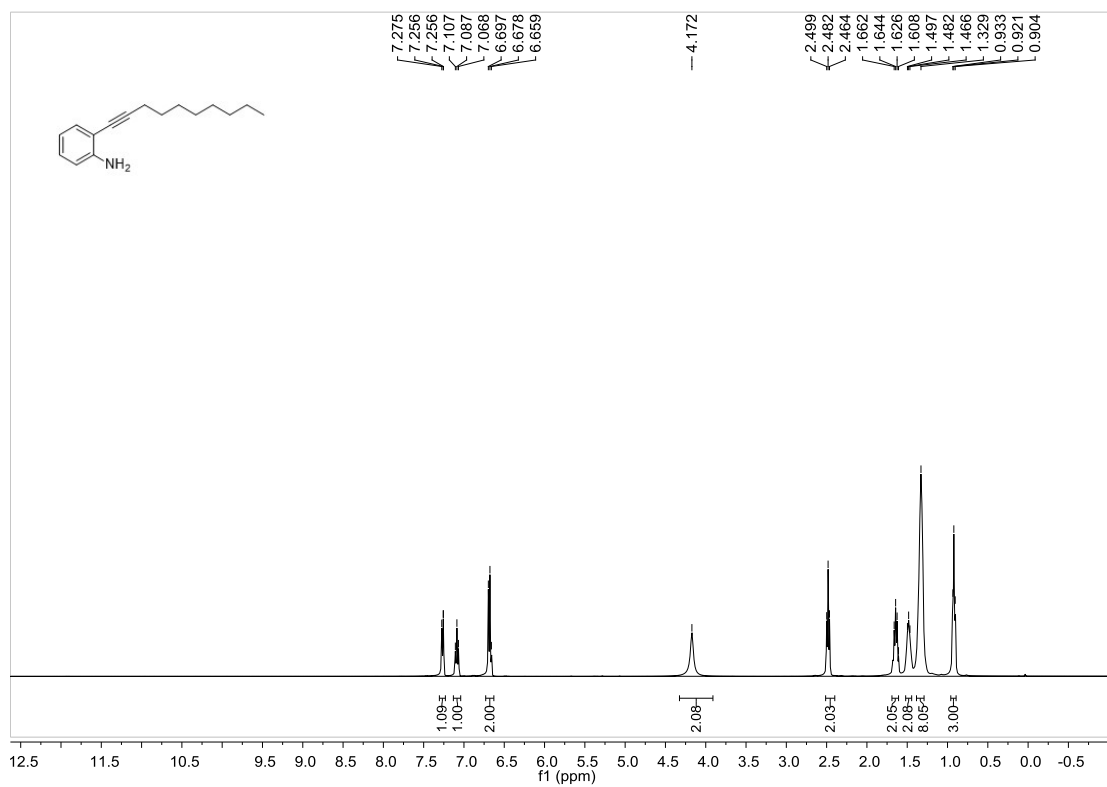

### $^{13}\text{C}$ NMR Spectrum of **6a**

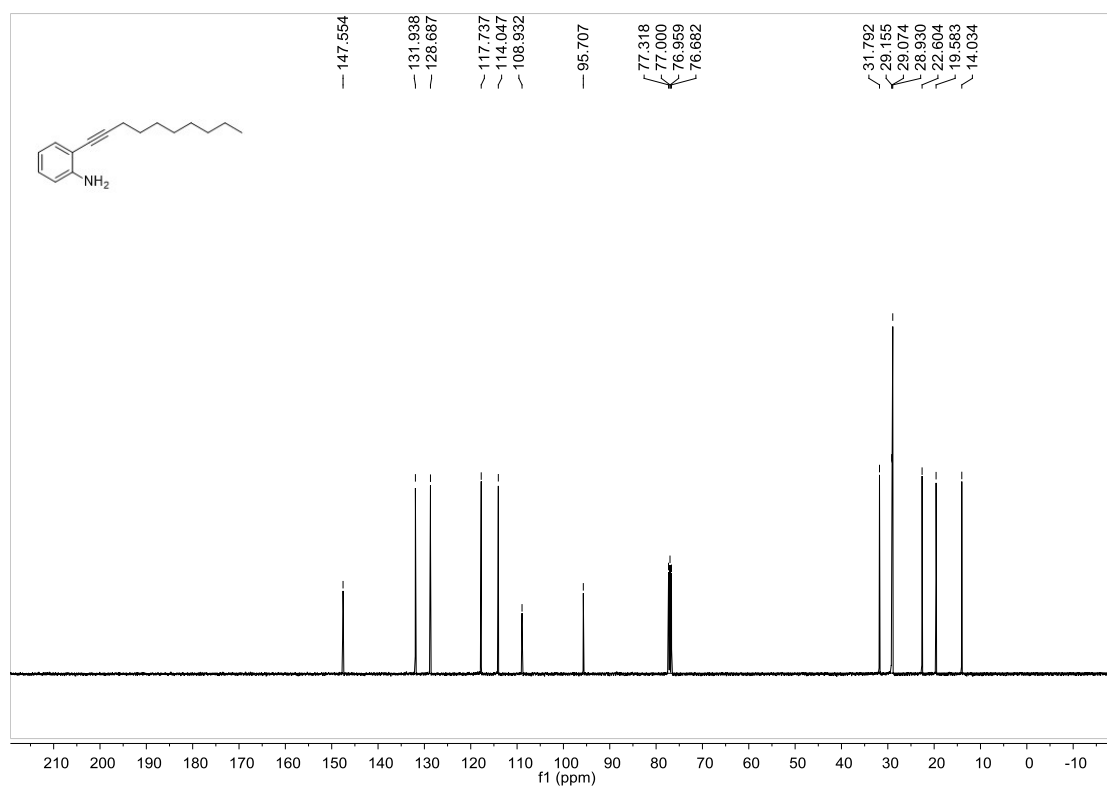

### $^1\text{H}$ NMR Spectrum of **7a**

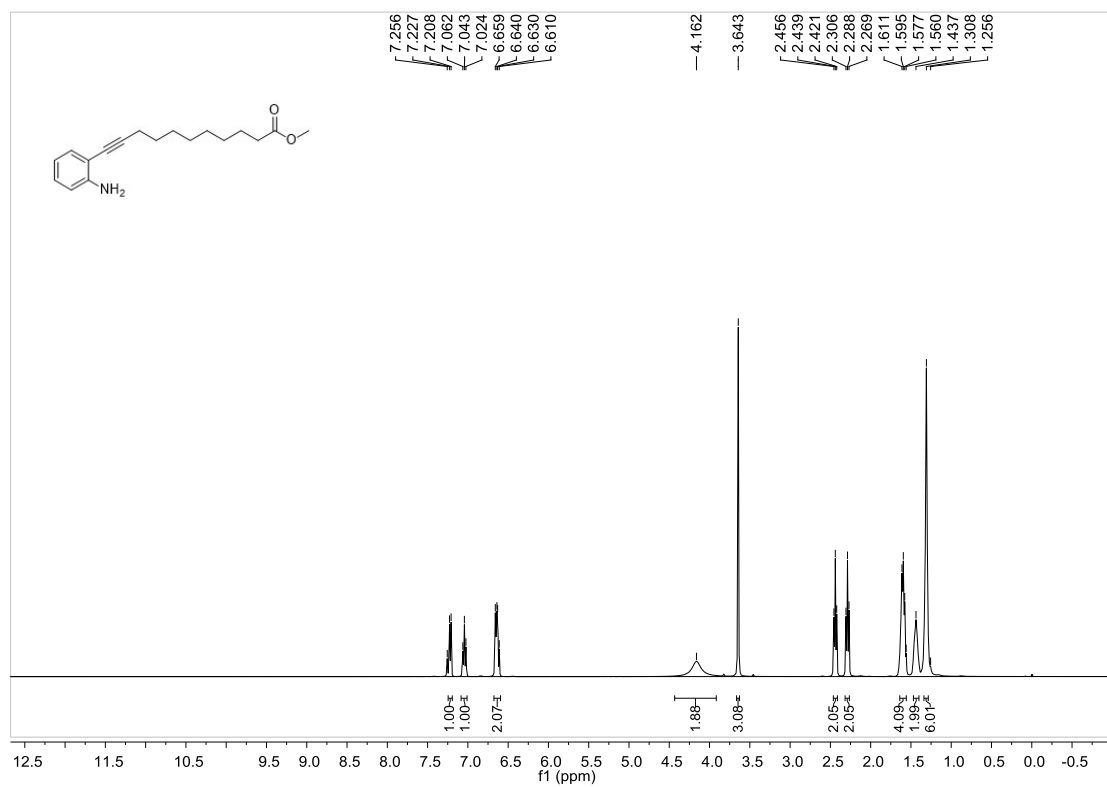

### <sup>13</sup>C NMR Spectrum of **7a**

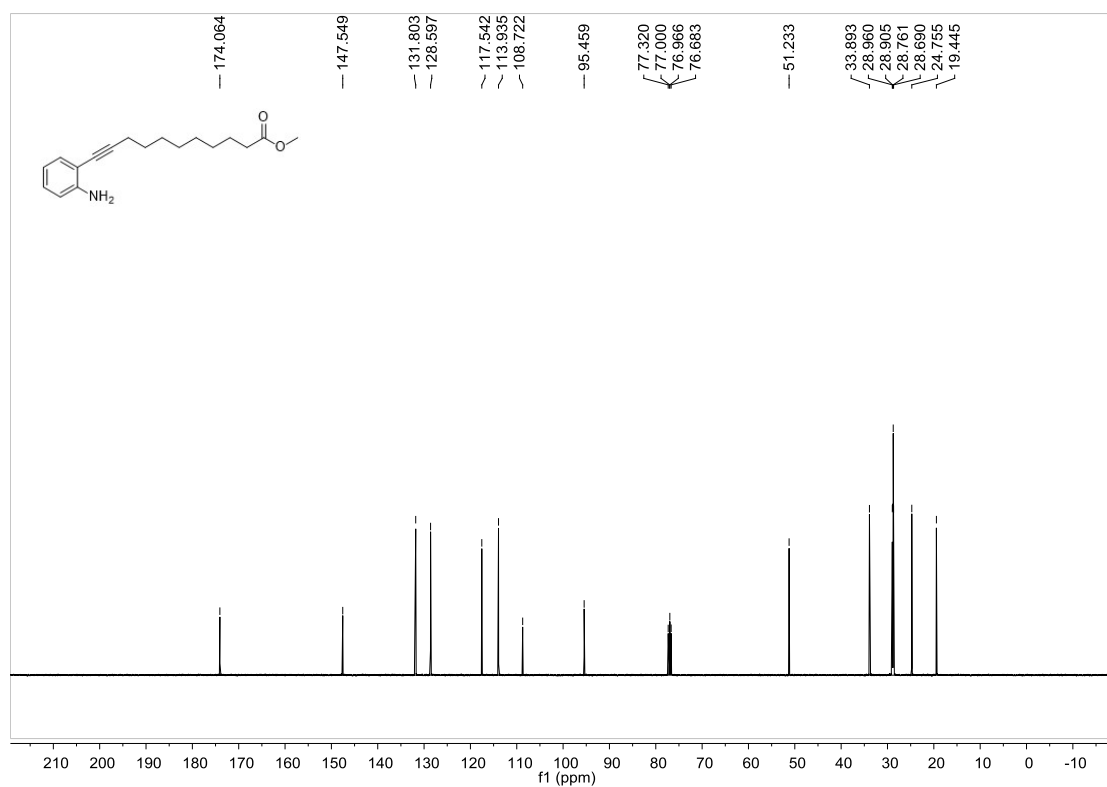

### <sup>1</sup>H NMR Spectrum of **8a**

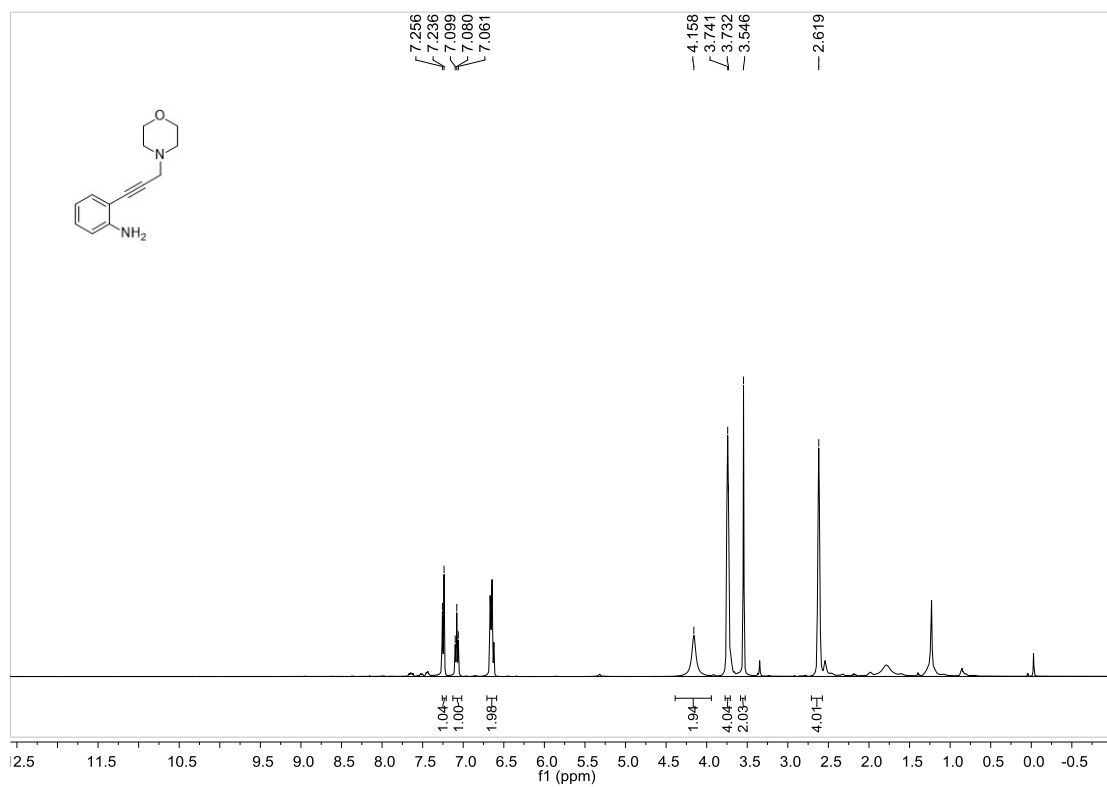



### <sup>13</sup>C NMR Spectrum of **8a**

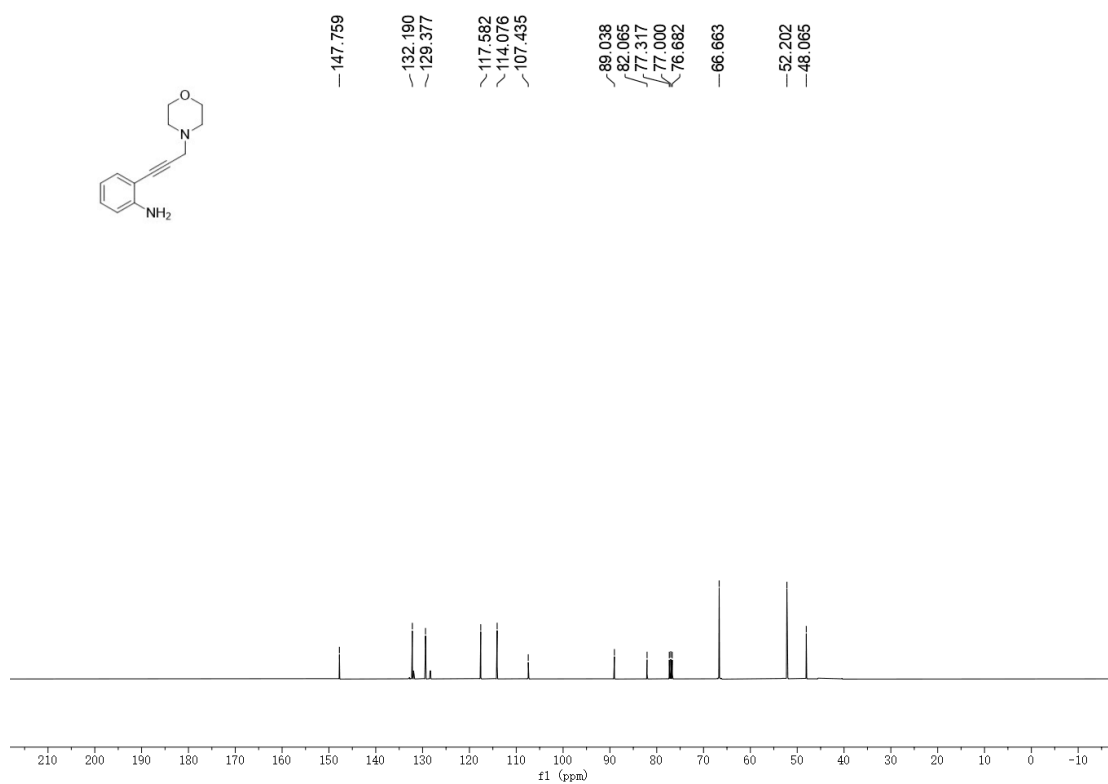

### <sup>1</sup>H NMR Spectrum of **9a**

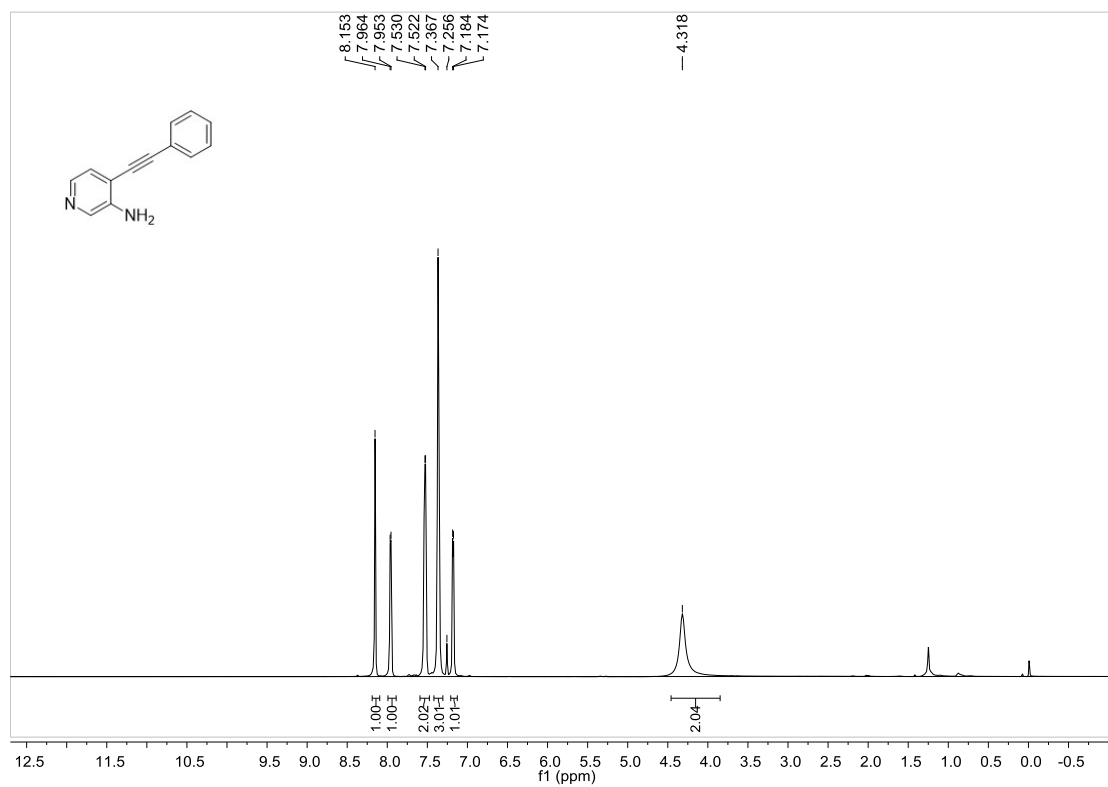

### <sup>13</sup>C NMR Spectrum of **9a**

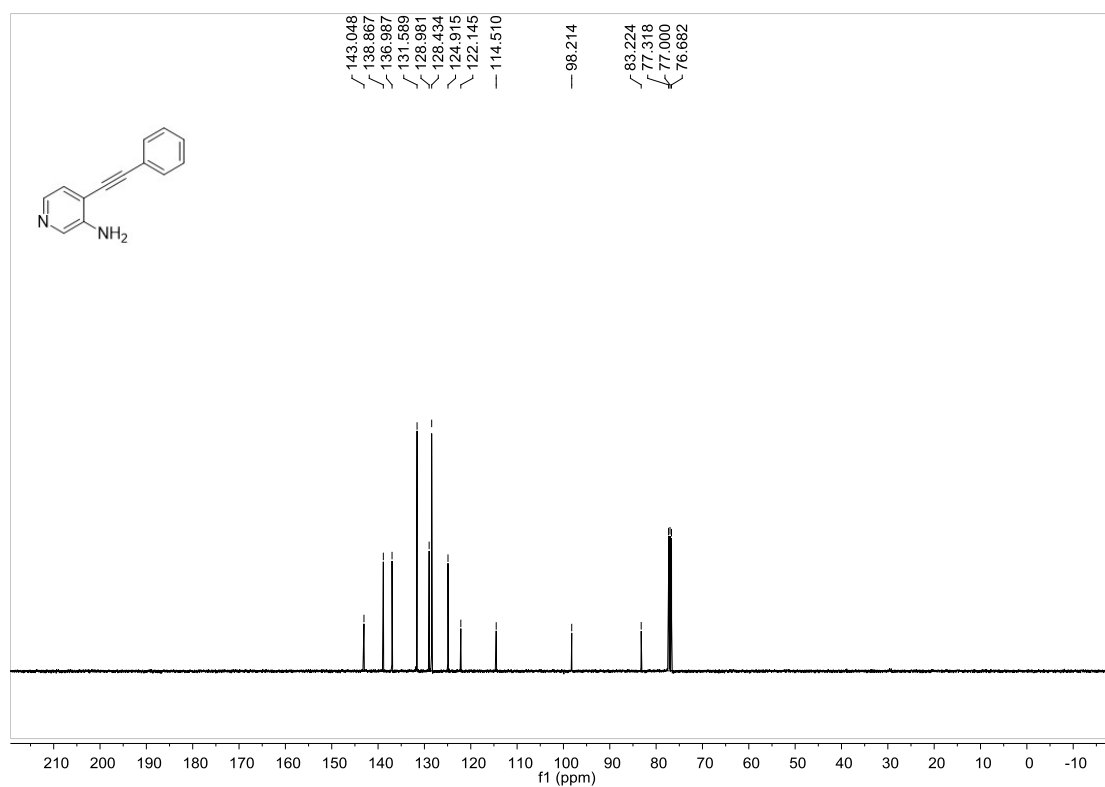

### <sup>1</sup>H NMR Spectrum of **10a**

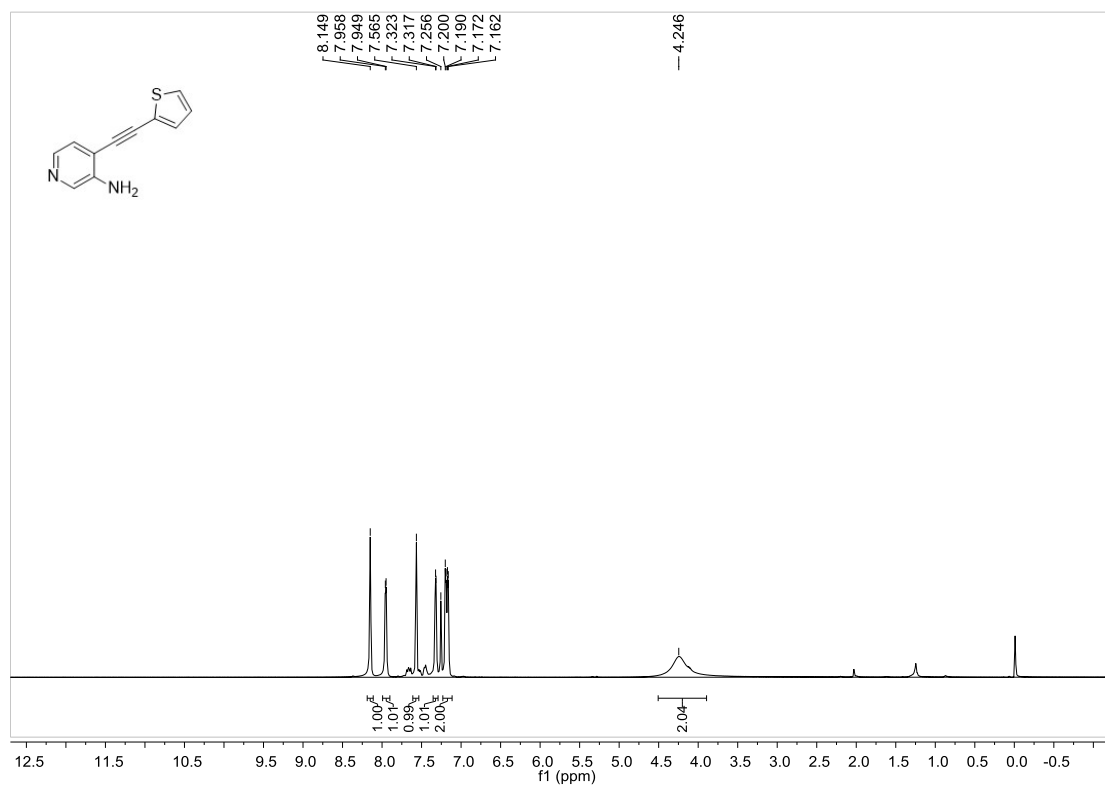

### <sup>13</sup>C NMR Spectrum of **10a**

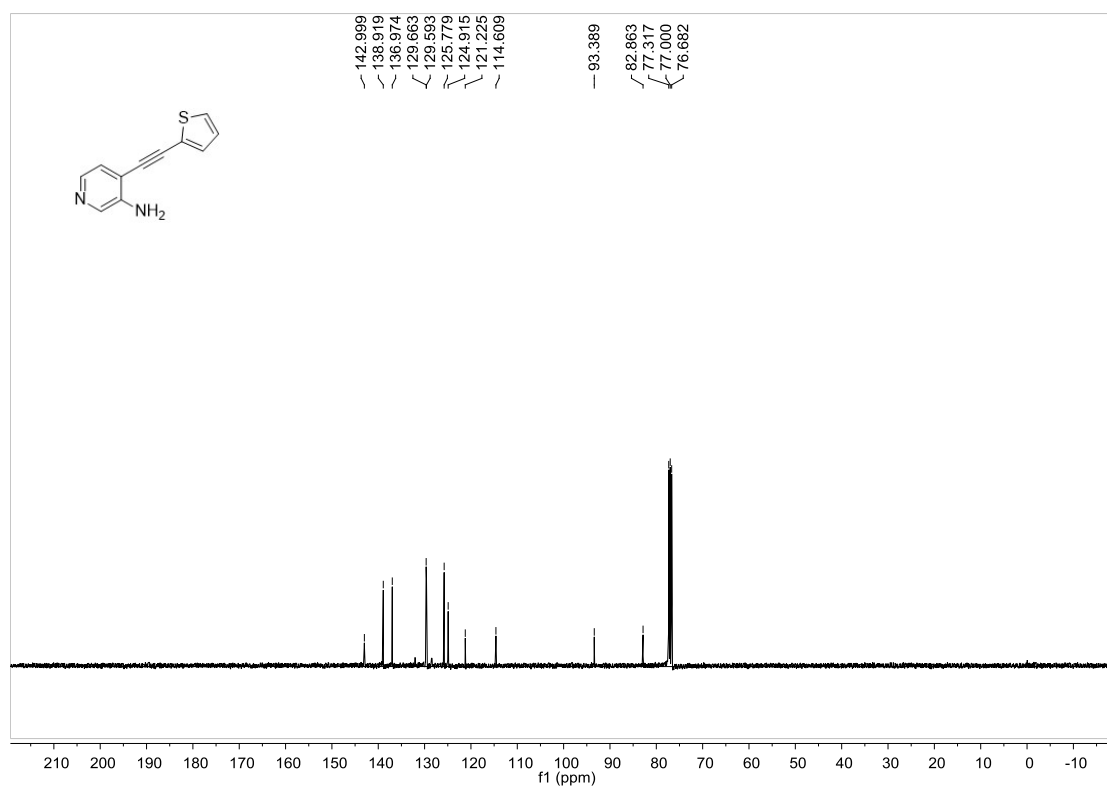

### <sup>1</sup>H NMR Spectrum of **2b**

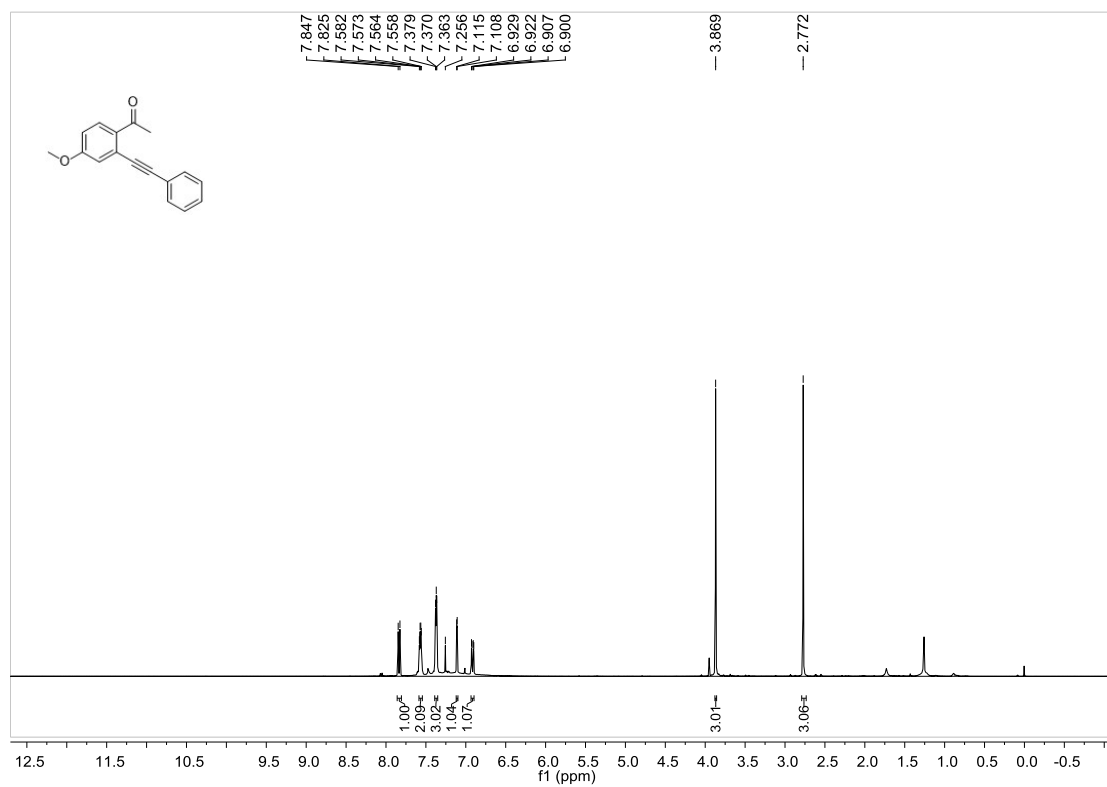

### <sup>1</sup>H NMR Spectrum of **3b**

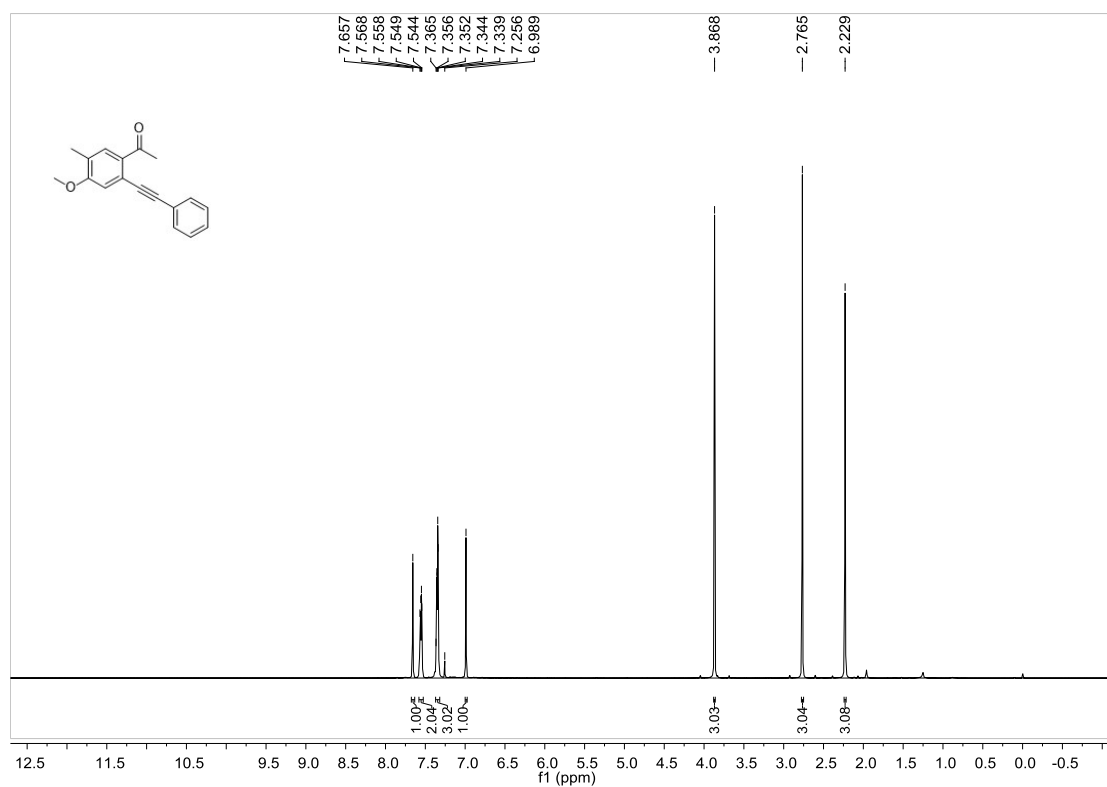

### <sup>13</sup>C NMR Spectrum of **3b**

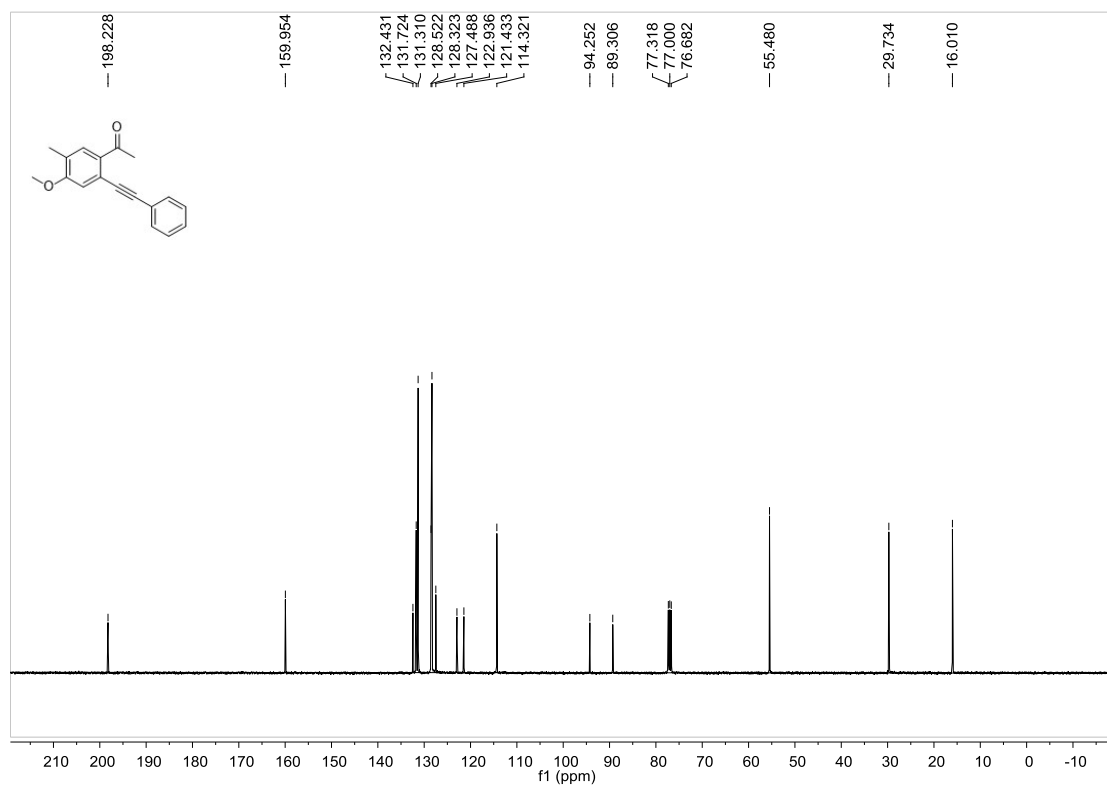

### <sup>1</sup>H NMR Spectrum of **4b**

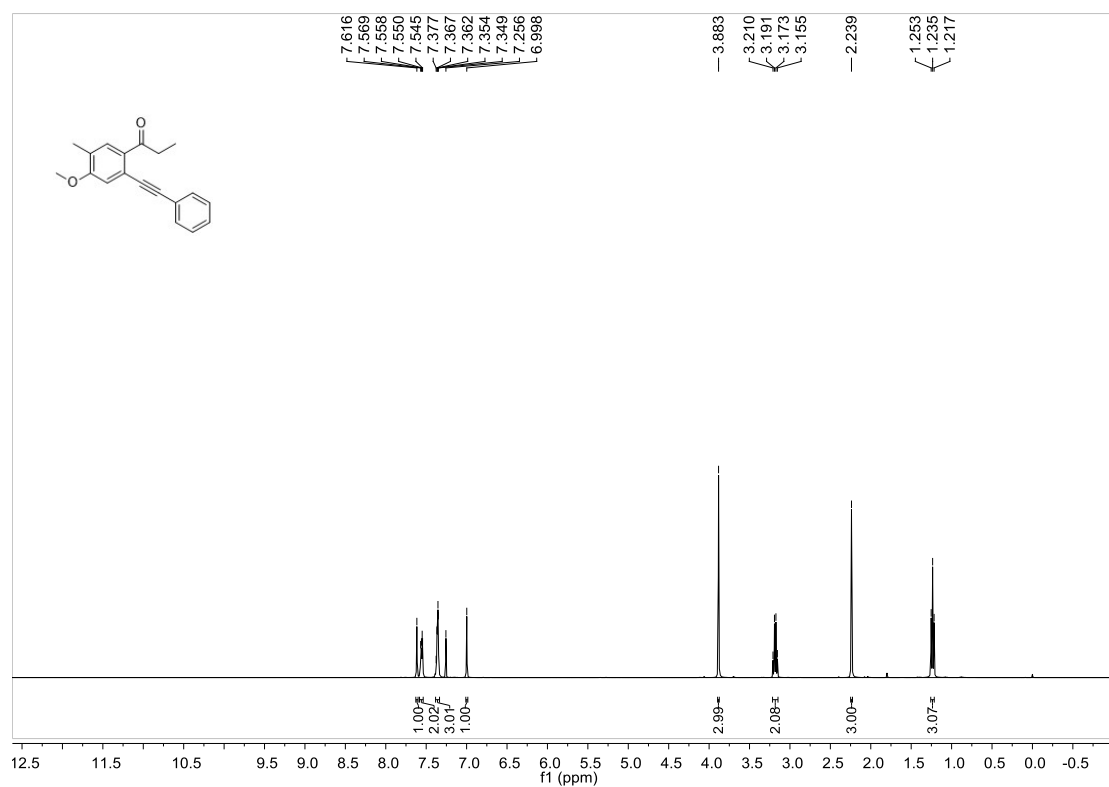

### <sup>13</sup>C NMR Spectrum of **4b**

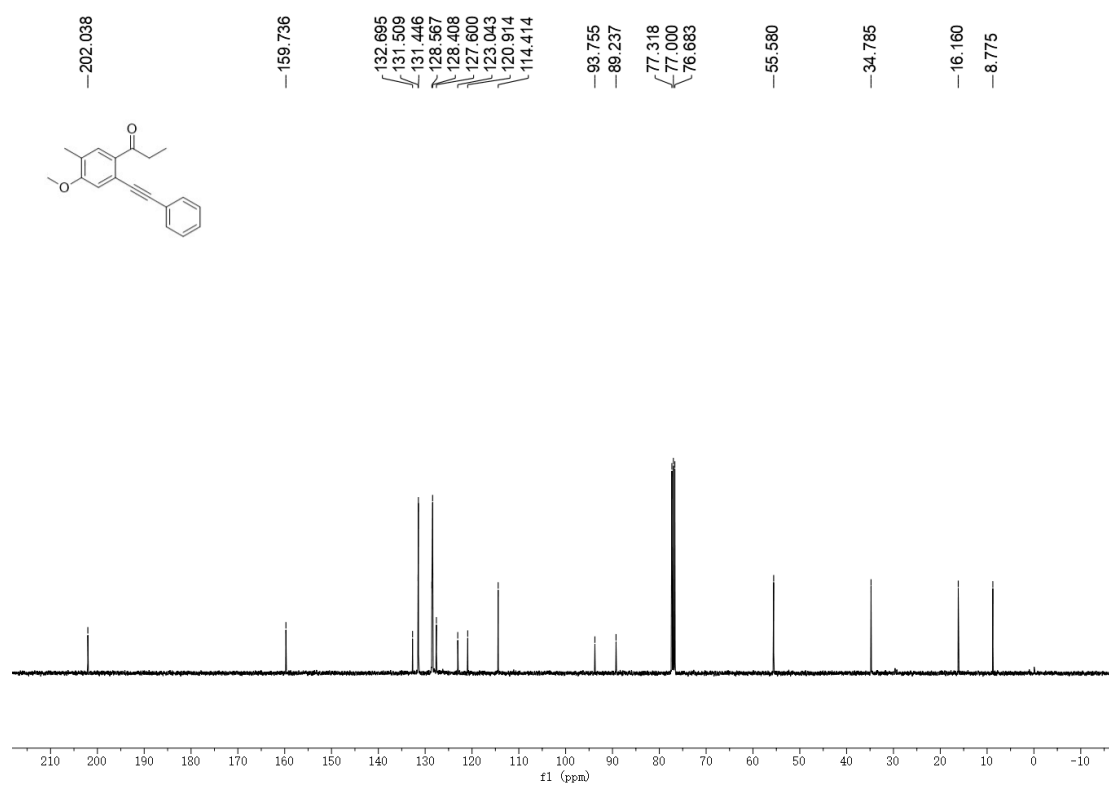

### <sup>1</sup>H NMR Spectrum of **5b**

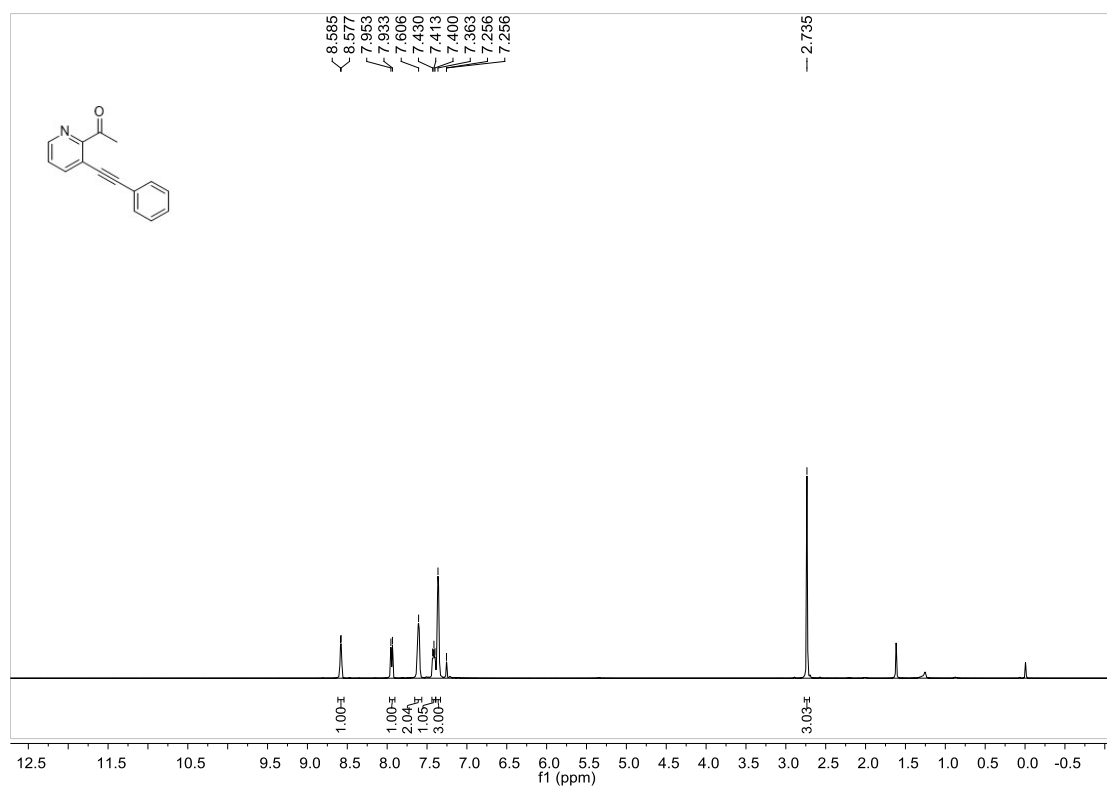

### <sup>13</sup>C NMR Spectrum of **5b**

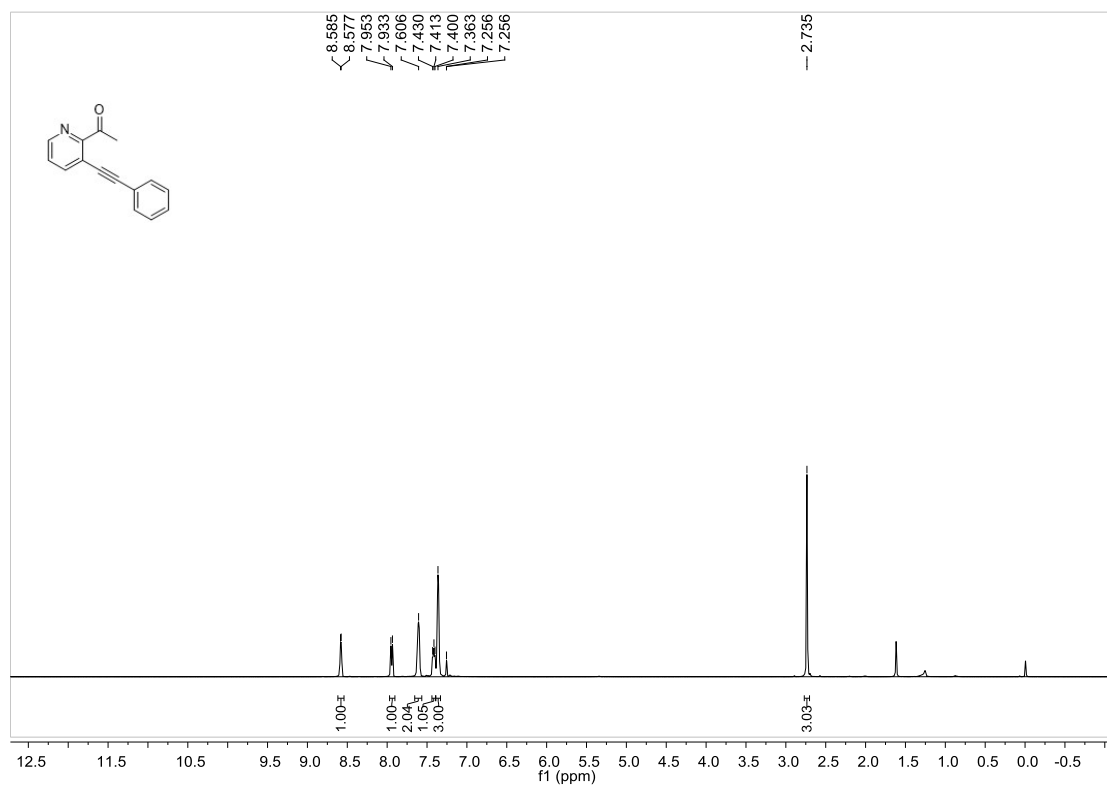

### <sup>1</sup>H NMR Spectrum of **6b**

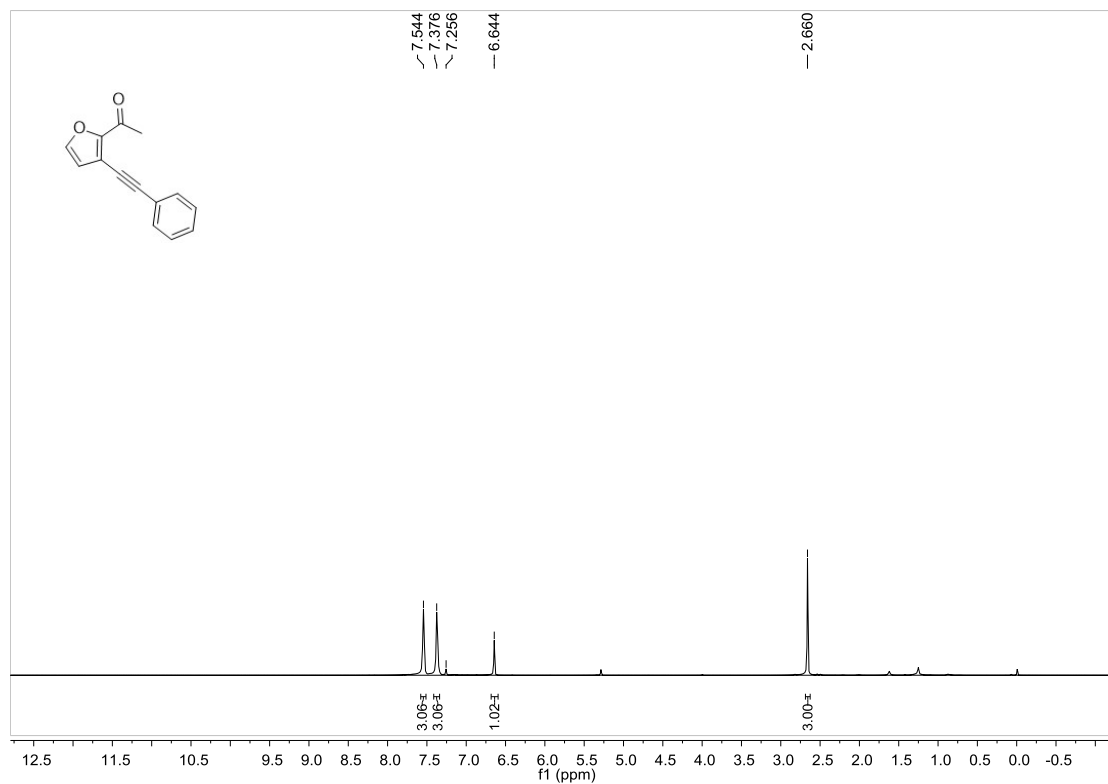

### <sup>13</sup>C NMR Spectrum of **6b**

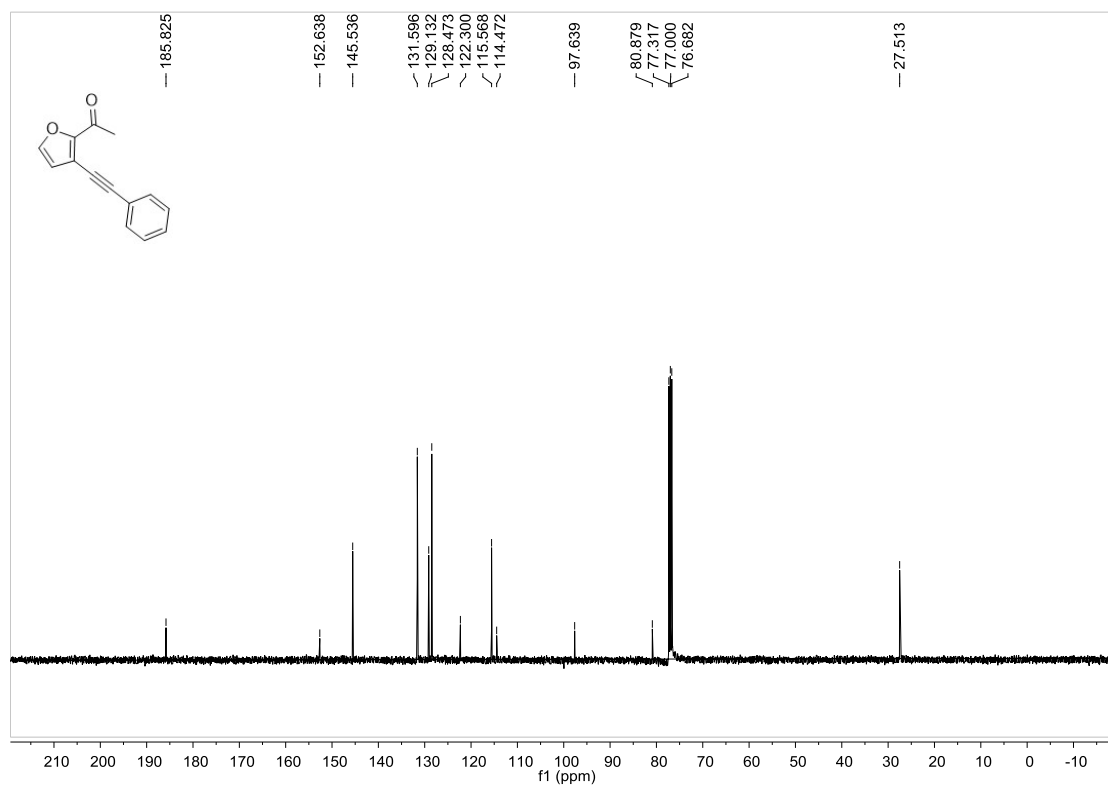

### <sup>1</sup>H NMR Spectrum of **7b**

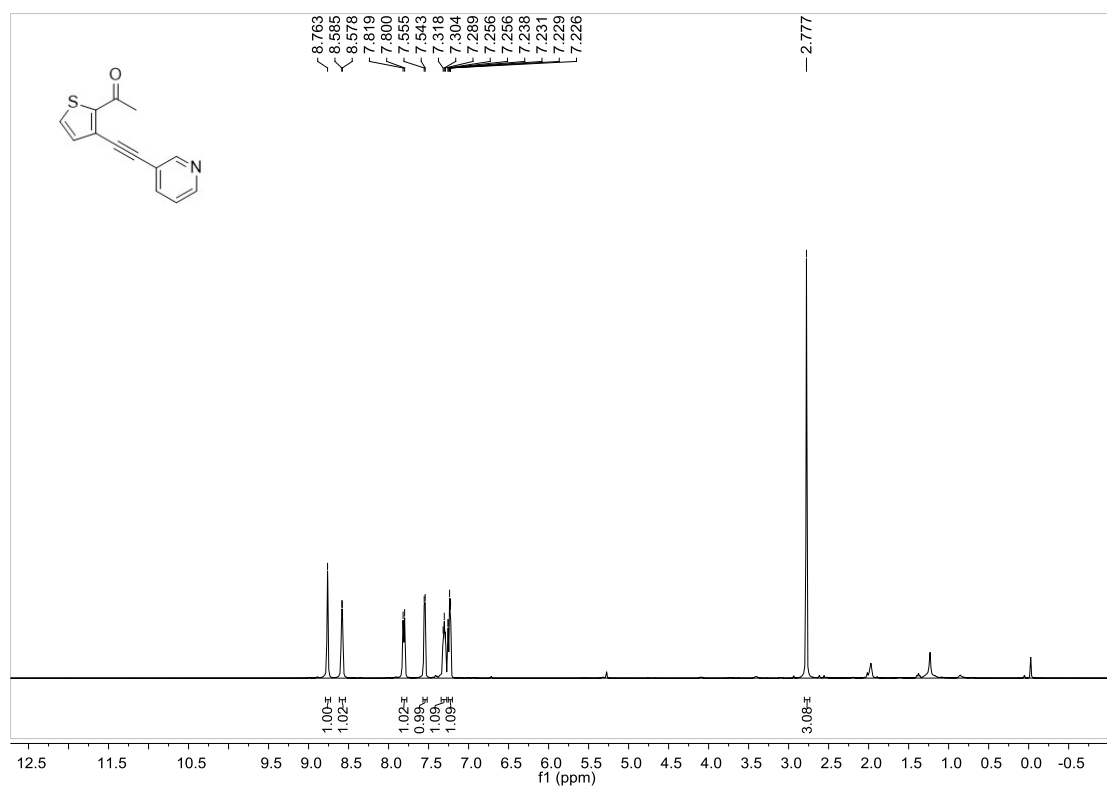

### <sup>13</sup>C NMR Spectrum of **7b**

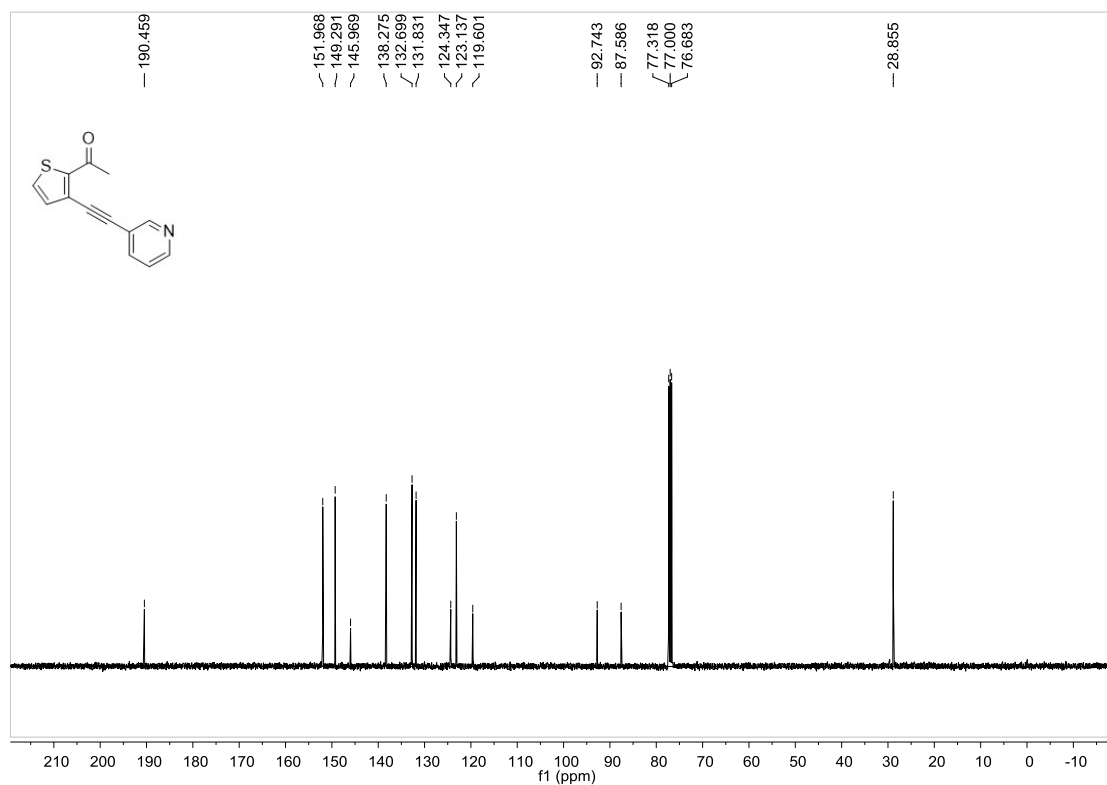



### <sup>1</sup>H NMR Spectrum of 1-ethynyl-4-(phenylethynyl)benzene

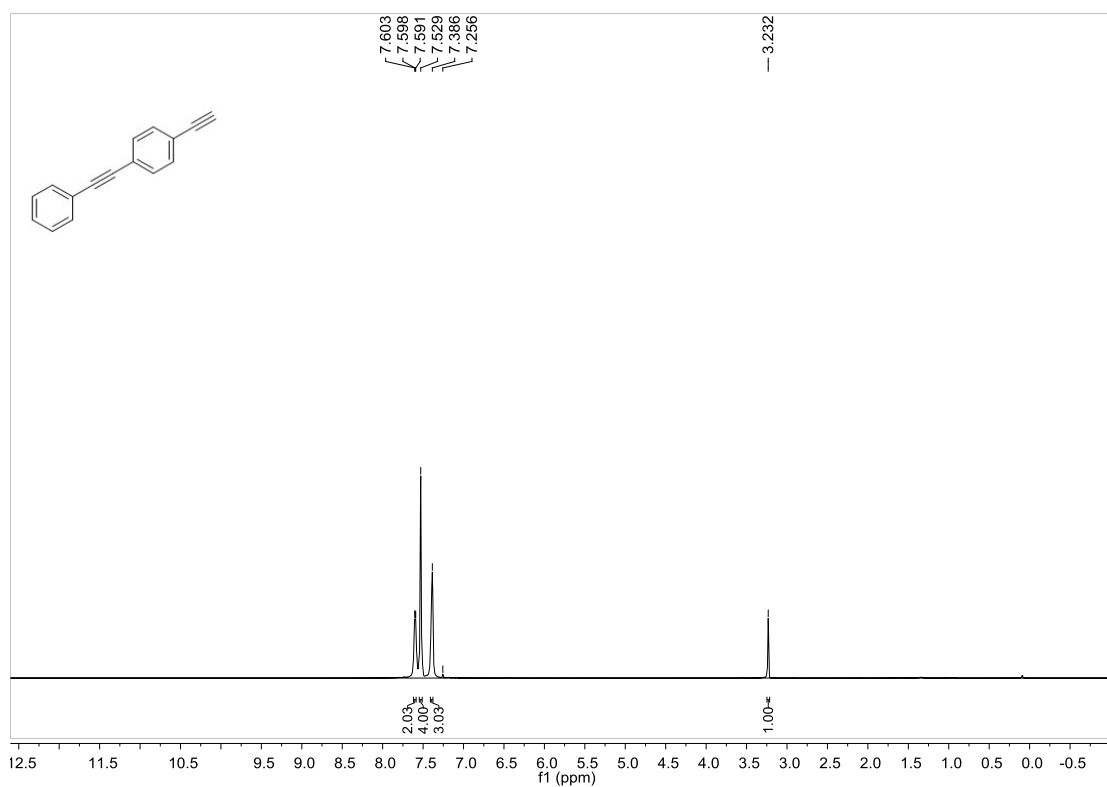

### <sup>13</sup>C NMR Spectrum of 1-ethynyl-4-(phenylethynyl)benzene

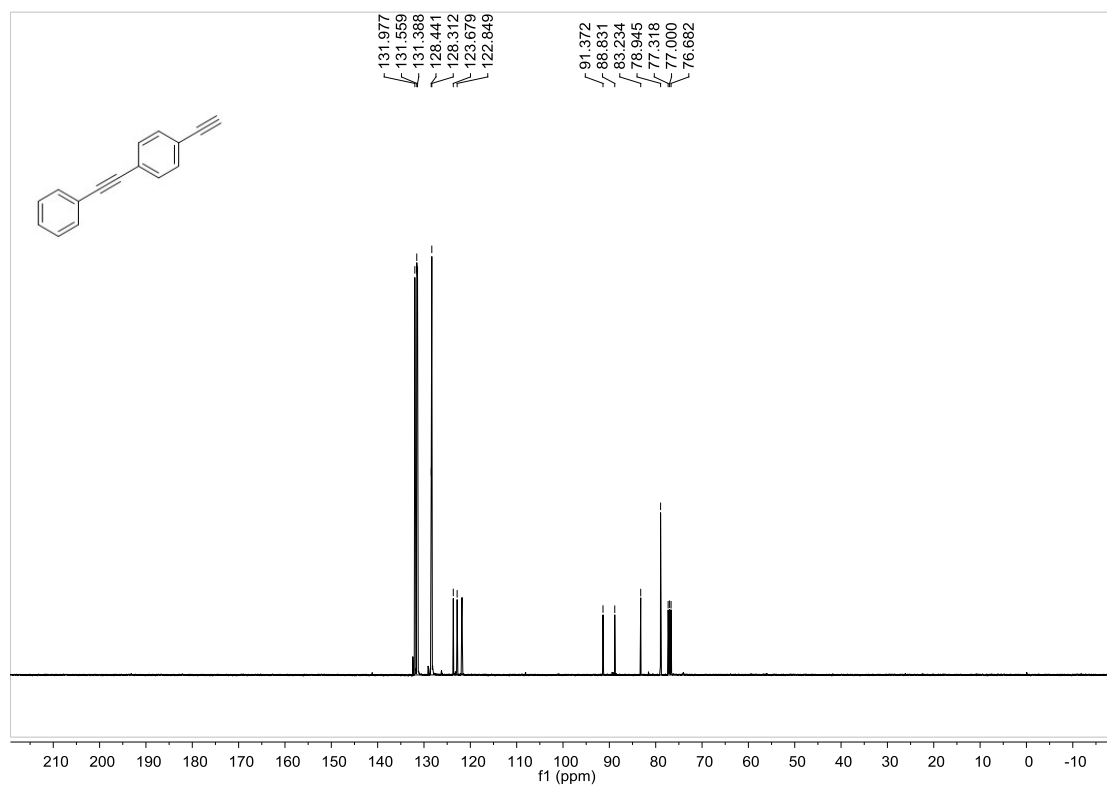

$^1\text{H}$  NMR Spectrum of **1b-d<sub>3</sub>** (98% D)

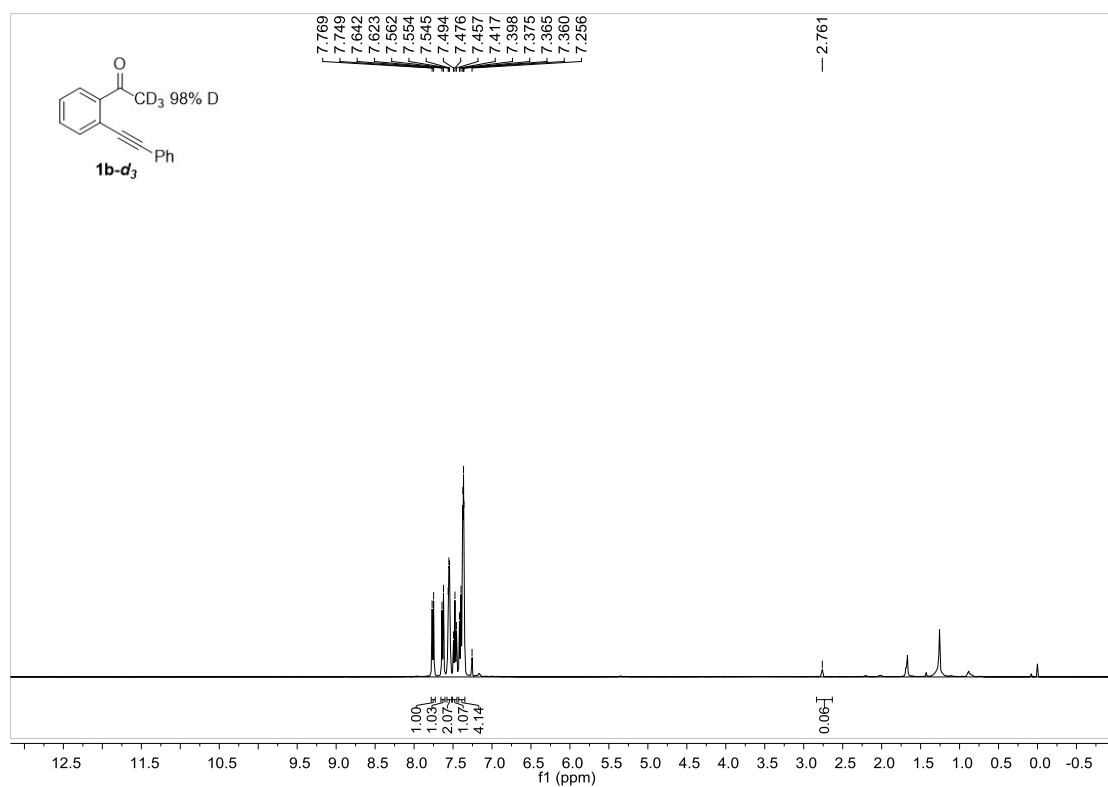

$^1\text{H}$  NMR Spectrum of **1b-d<sub>3</sub>** (95% D)

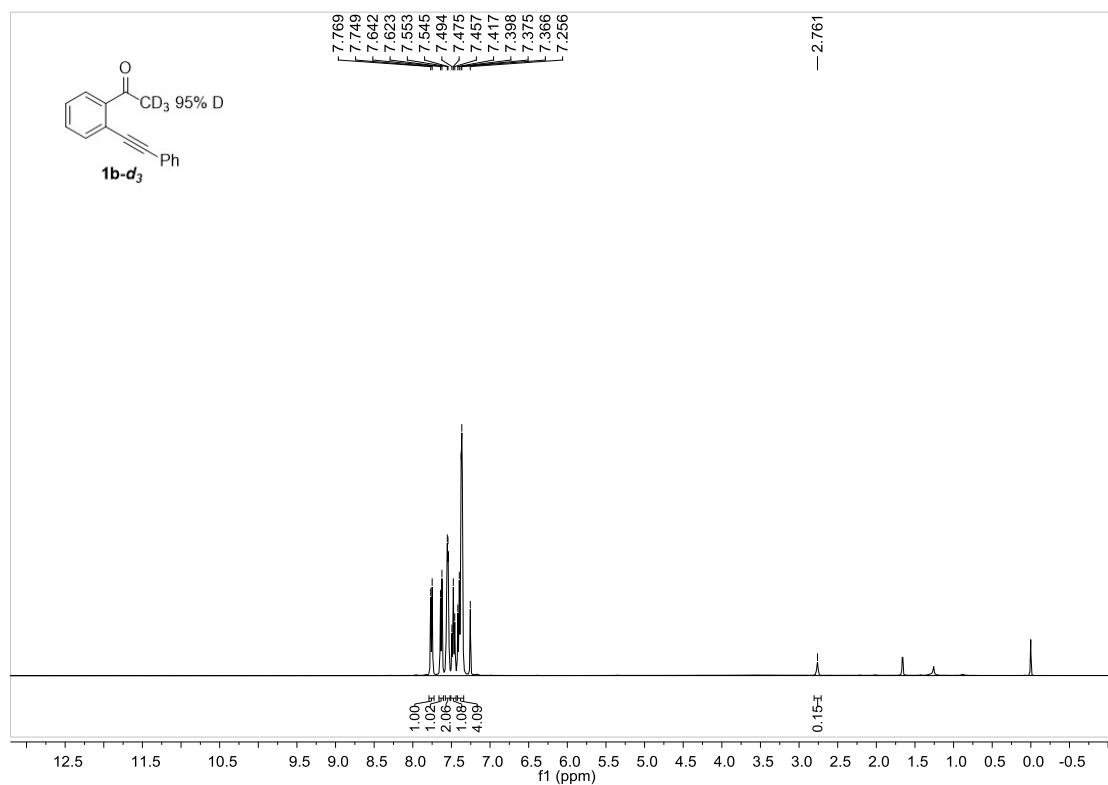

<sup>1</sup>H NMR Spectrum of **1b-d<sub>3</sub>** (83% D)

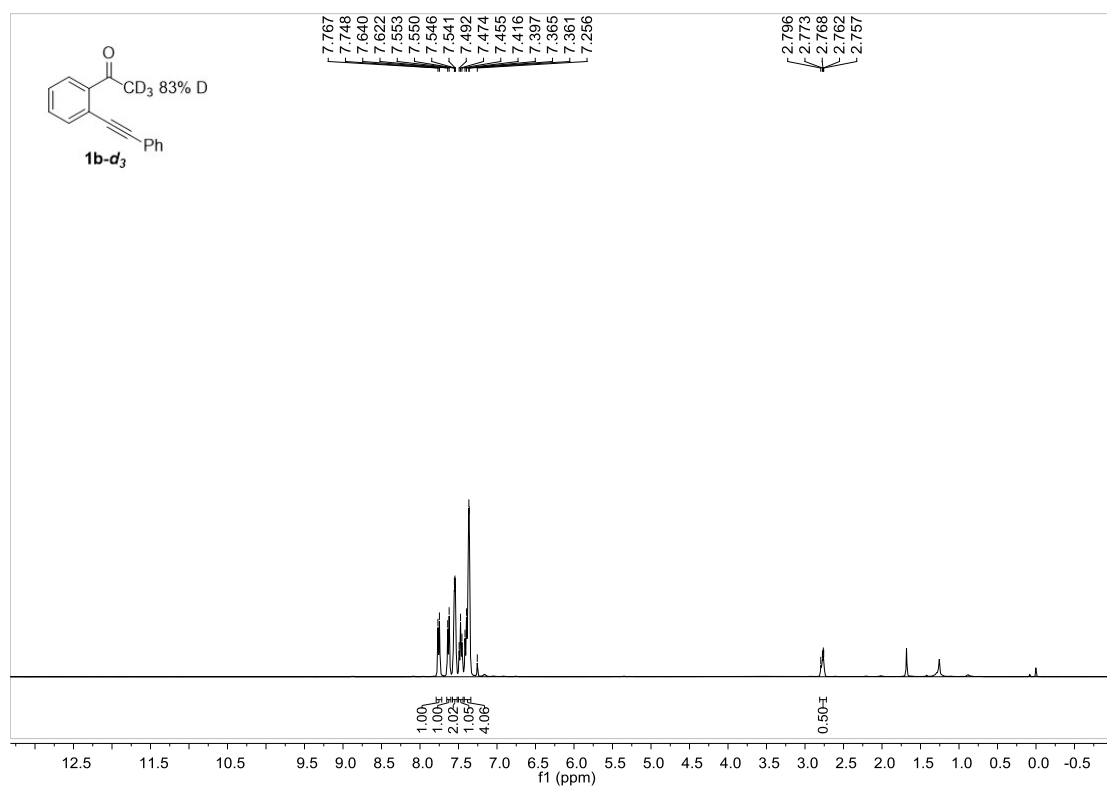

<sup>1</sup>H NMR Spectrum of **1b-d<sub>3</sub>** (13% D)

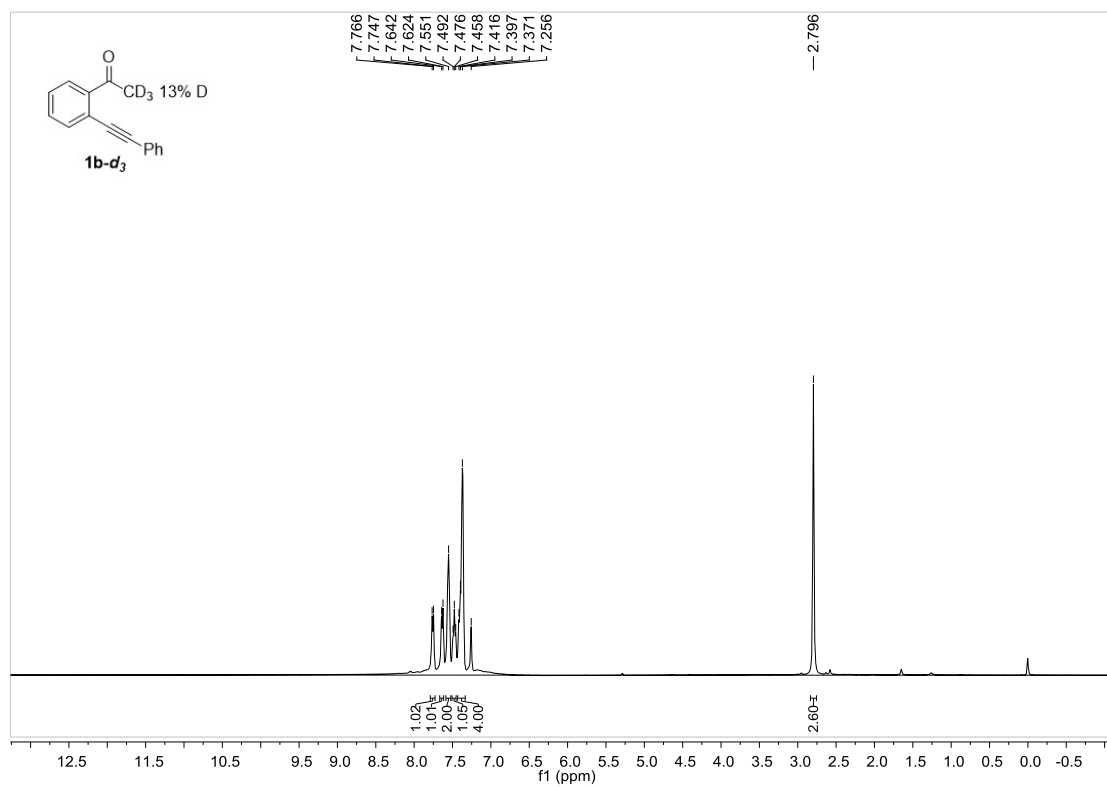

$^1\text{H}$  NMR Spectrum of **1b-d<sub>3</sub>** (0% D)

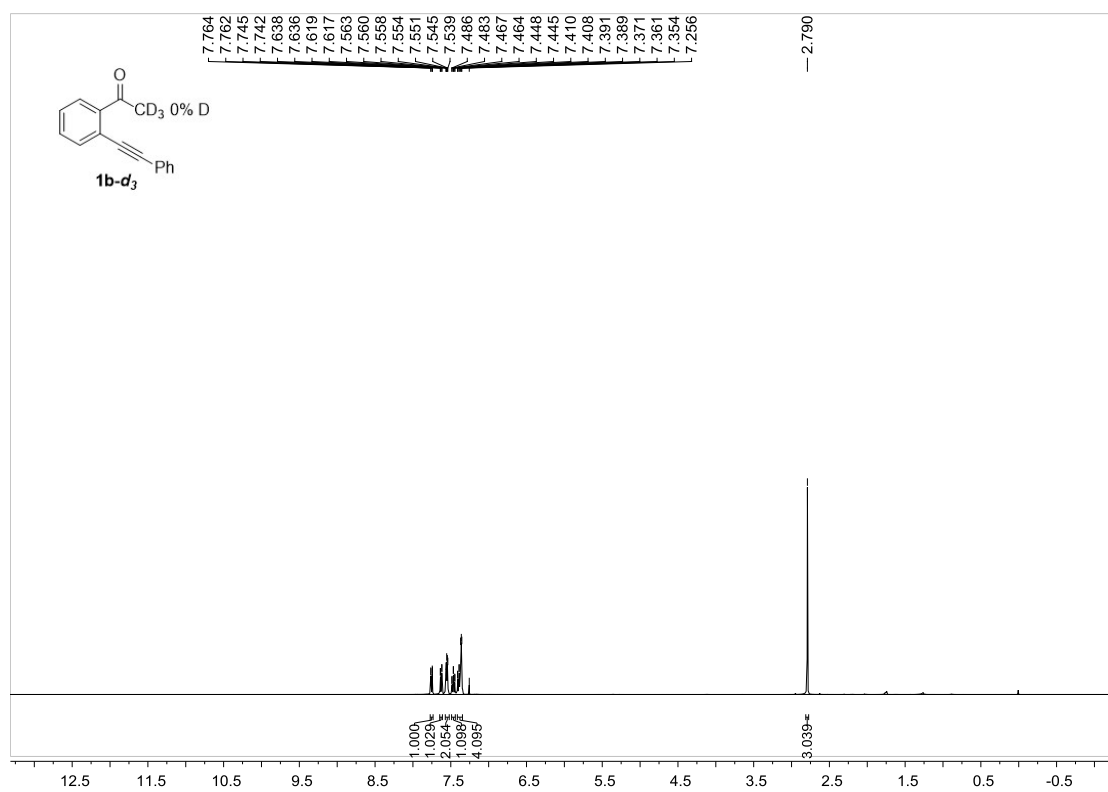

## 11. References

- [1] C. Zhang, M. Liu, M. Ding, H. Xie, F. Zhang, *Org. Lett.* **2017**, *19*, 3418-3421.
- [2] a) J. E. Perea-Buceta, T. Wirtanen, O. V. Laukkanen, M. K. Makela, M. Nieger, M. Melchionna, N. Huittinen, J. A. Lopez-Sanchez, J. Helaja, *Angew. Chem., Int. Ed.* **2013**, *52*, 11835-11839; b) C. N. Voth, G. R. Dake, *Eur. J. Org. Chem.* **2020**, *2020*, 744-748; c) P. Rubio-Marques, M. A. Rivero-Crespo, A. Leyva-Perez, A. Corma, *J. Am. Chem. Soc.* **2015**, *137*, 11832-11837; d) B. Li, Z. Ju, M. Zhou, K. Su, D. Yuan, *Angew. Chem., Int. Ed.* **2019**, *58*, 7687-7691; e) W. C. Yang, X. B. Chen, K. L. Song, B. Wu, W. E. Gan, Z. J. Zheng, J. Cao, L. W. Xu, *Org. Lett.* **2021**, *23*, 1309-1314; f) S. Yuan, D. Q. Zhang, J. Y. Zhang, B. Yu, H. M. Liu, *Org. Lett.* **2020**, *22*, 814-817.
- [3] R. Jia, B. Li, X. Zhang, X. Fan, *Org. Lett.* **2020**, *22*, 6810-6815.
- [4] K. Sakthivel, K. Srinivasan, *Eur. J. Org. Chem.* **2011**, *2011*, 2781-2784.
- [5] S. T. Yuan, H. Zhou, L. Zhang, J. B. Liu, G. Qiu, *Org. Biomol. Chem.* **2017**, *15*, 4867-4874.
- [6] a) N. Chernyak, S. I. Gorelsky, V. Gevorgyan, *Angew. Chem., Int. Ed.* **2011**, *50*, 2342-2345; b) L. Song, G. Tian, E. V. Van der Eycken, *Chem.--Eur. J.* **2019**, *25*, 7645-7648.
- [7] M. E. Domaradzki, Y. Long, Z. She, X. Liu, G. Zhang, Y. Chen, *J. Org. Chem.* **2015**, *80*, 11360-11368.
- [8] S. Barbosa, M. Ottone, M. de Almeida, G. Lage, M. Almeida, D. Nelson, W. dos Santos, G. Clososki, N. Lopes, S. Klein, L. Zanatta, *J. Braz. Chem. Soc.* **2018**.
- [9] a) T. Miao, Z. Y. Tian, Y. M. He, F. Chen, Y. Chen, Z. X. Yu, Q. H. Fan, *Angew. Chem., Int. Ed.* **2017**, *56*, 4135-4139; b) M. Terada, F. Li, Y. Toda, *Angew. Chem., Int. Ed.* **2014**, *53*, 235-239.
- [10] B. Guo, L. Zheng, L. Yang, R. Hua, *J. Org. Chem.* **2014**, *79*, 4352-4357.
- [11] M. Zhang, W. Ruan, H. J. Zhang, W. Li, T. B. Wen, *J. Org. Chem.* **2016**, *81*, 1696-1703.
- [12] M. Chen, N. Sun, H. Chen, Y. Liu, *Chem. Commun.* **2016**, *52*, 6324-6327.
- [13] J. Garcia, J. Sorrentino, E. J. Diller, D. Chapman, T. R. Woydziak, *Synthetic Commun.* **2016**, *46*, 475-481.
- [14] L. Z. Yu, Y. Wei, M. Shi, *Chem. Commun.* **2017**, *53*, 8980-8983.
- [15] H. Tsukamoto, Y. Kondo, *Org. Lett.* **2007**, *9*, 4227-4230.
- [16] H. P. Lin, N. Ibrahim, O. Provot, M. Alami, A. Hamze, *RSC Adv.* **2018**, *8*, 11536-11542.
